# Supplementary material for: Phylogenomics of crabs provides insights into their origin and evolution
Source: Research Square preprint supplement (doi:10.21203/rs.3.rs-5612812/v1), 2025-01-10
Supplement: Supplementary file 1 [file 39e6d6baed6a4554f9f29e44.xlsx]

## Sheet: duanwei-ref_aijiexie-go.result
	ID	Description	GeneRatio	BgRatio	pvalue	p.adjust	qvalue	geneID	Count
GO:0043291	GO:0043291	RAVE complex	131/494	406/12875	3.87473288838617e-88	1.42318938990424e-84	1.23991452428357e-84	A. integerrimus|evm.model.ctg018490_np12.36/A. integerrimus|evm.model.ctg004570_np12.112/A. integerrimus|evm.model.ctg030440_np12.146/A. integerrimus|evm.model.ctg022020_np12.25/A. integerrimus|evm.model.ctg014950_np12.49/A. integerrimus|evm.model.ctg015350_np12.9/A. integerrimus|evm.model.ctg017730_np12.77/A. integerrimus|evm.model.ctg021900_np12.57/A. integerrimus|evm.model.ctg027920_np12.9/A. …	131
GO:0070070	GO:0070070	proton-transporting V-type ATPase complex assembly	131/494	411/12875	2.30686339203592e-87	2.82436974631598e-84	2.46065428483832e-84	A. integerrimus|evm.model.ctg018490_np12.36/A. integerrimus|evm.model.ctg004570_np12.112/A. integerrimus|evm.model.ctg030440_np12.146/A. integerrimus|evm.model.ctg022020_np12.25/A. integerrimus|evm.model.ctg014950_np12.49/A. integerrimus|evm.model.ctg015350_np12.9/A. integerrimus|evm.model.ctg017730_np12.77/A. integerrimus|evm.model.ctg021900_np12.57/A. integerrimus|evm.model.ctg027920_np12.9/A. …	131
GO:0070072	GO:0070072	vacuolar proton-transporting V-type ATPase complex assembly	131/494	411/12875	2.30686339203592e-87	2.82436974631598e-84	2.46065428483832e-84	A. integerrimus|evm.model.ctg018490_np12.36/A. integerrimus|evm.model.ctg004570_np12.112/A. integerrimus|evm.model.ctg030440_np12.146/A. integerrimus|evm.model.ctg022020_np12.25/A. integerrimus|evm.model.ctg014950_np12.49/A. integerrimus|evm.model.ctg015350_np12.9/A. integerrimus|evm.model.ctg017730_np12.77/A. integerrimus|evm.model.ctg021900_np12.57/A. integerrimus|evm.model.ctg027920_np12.9/A. …	131
GO:0070071	GO:0070071	proton-transporting two-sector ATPase complex assembly	131/494	415/12875	9.41753625379239e-87	8.64765266504486e-84	7.53402900303391e-84	A. integerrimus|evm.model.ctg018490_np12.36/A. integerrimus|evm.model.ctg004570_np12.112/A. integerrimus|evm.model.ctg030440_np12.146/A. integerrimus|evm.model.ctg022020_np12.25/A. integerrimus|evm.model.ctg014950_np12.49/A. integerrimus|evm.model.ctg015350_np12.9/A. integerrimus|evm.model.ctg017730_np12.77/A. integerrimus|evm.model.ctg021900_np12.57/A. integerrimus|evm.model.ctg027920_np12.9/A. …	131
GO:0007035	GO:0007035	vacuolar acidification	131/494	423/12875	1.48866158354099e-85	1.09357079926921e-82	9.52743413466233e-83	A. integerrimus|evm.model.ctg018490_np12.36/A. integerrimus|evm.model.ctg004570_np12.112/A. integerrimus|evm.model.ctg030440_np12.146/A. integerrimus|evm.model.ctg022020_np12.25/A. integerrimus|evm.model.ctg014950_np12.49/A. integerrimus|evm.model.ctg015350_np12.9/A. integerrimus|evm.model.ctg017730_np12.77/A. integerrimus|evm.model.ctg021900_np12.57/A. integerrimus|evm.model.ctg027920_np12.9/A. …	131
GO:0035149	GO:0035149	lumen formation, open tracheal system	131/494	427/12875	5.76887818319805e-85	3.53151492781441e-82	3.07673503103896e-82	A. integerrimus|evm.model.ctg018490_np12.36/A. integerrimus|evm.model.ctg004570_np12.112/A. integerrimus|evm.model.ctg030440_np12.146/A. integerrimus|evm.model.ctg022020_np12.25/A. integerrimus|evm.model.ctg014950_np12.49/A. integerrimus|evm.model.ctg015350_np12.9/A. integerrimus|evm.model.ctg017730_np12.77/A. integerrimus|evm.model.ctg021900_np12.57/A. integerrimus|evm.model.ctg027920_np12.9/A. …	131
GO:0051452	GO:0051452	intracellular pH reduction	131/494	432/12875	3.06448446505878e-84	1.60797877716584e-81	1.40090718402687e-81	A. integerrimus|evm.model.ctg018490_np12.36/A. integerrimus|evm.model.ctg004570_np12.112/A. integerrimus|evm.model.ctg030440_np12.146/A. integerrimus|evm.model.ctg022020_np12.25/A. integerrimus|evm.model.ctg014950_np12.49/A. integerrimus|evm.model.ctg015350_np12.9/A. integerrimus|evm.model.ctg017730_np12.77/A. integerrimus|evm.model.ctg021900_np12.57/A. integerrimus|evm.model.ctg027920_np12.9/A. …	131
GO:0045851	GO:0045851	pH reduction	131/494	433/12875	4.2666675027018e-84	1.95893371717796e-81	1.70666700108072e-81	A. integerrimus|evm.model.ctg018490_np12.36/A. integerrimus|evm.model.ctg004570_np12.112/A. integerrimus|evm.model.ctg030440_np12.146/A. integerrimus|evm.model.ctg022020_np12.25/A. integerrimus|evm.model.ctg014950_np12.49/A. integerrimus|evm.model.ctg015350_np12.9/A. integerrimus|evm.model.ctg017730_np12.77/A. integerrimus|evm.model.ctg021900_np12.57/A. integerrimus|evm.model.ctg027920_np12.9/A. …	131
GO:0051453	GO:0051453	regulation of intracellular pH	131/494	453/12875	2.60917407523424e-81	1.06483293092615e-78	9.27706337861062e-79	A. integerrimus|evm.model.ctg018490_np12.36/A. integerrimus|evm.model.ctg004570_np12.112/A. integerrimus|evm.model.ctg030440_np12.146/A. integerrimus|evm.model.ctg022020_np12.25/A. integerrimus|evm.model.ctg014950_np12.49/A. integerrimus|evm.model.ctg015350_np12.9/A. integerrimus|evm.model.ctg017730_np12.77/A. integerrimus|evm.model.ctg021900_np12.57/A. integerrimus|evm.model.ctg027920_np12.9/A. …	131
GO:0030641	GO:0030641	regulation of cellular pH	131/494	455/12875	4.85601885766561e-81	1.78361572642058e-78	1.55392603445299e-78	A. integerrimus|evm.model.ctg018490_np12.36/A. integerrimus|evm.model.ctg004570_np12.112/A. integerrimus|evm.model.ctg030440_np12.146/A. integerrimus|evm.model.ctg022020_np12.25/A. integerrimus|evm.model.ctg014950_np12.49/A. integerrimus|evm.model.ctg015350_np12.9/A. integerrimus|evm.model.ctg017730_np12.77/A. integerrimus|evm.model.ctg021900_np12.57/A. integerrimus|evm.model.ctg027920_np12.9/A. …	131
GO:0030004	GO:0030004	GO:0030004	131/494	465/12875	1.02879902867129e-79	3.43525348391785e-77	2.9928699015892e-77	A. integerrimus|evm.model.ctg018490_np12.36/A. integerrimus|evm.model.ctg004570_np12.112/A. integerrimus|evm.model.ctg030440_np12.146/A. integerrimus|evm.model.ctg022020_np12.25/A. integerrimus|evm.model.ctg014950_np12.49/A. integerrimus|evm.model.ctg015350_np12.9/A. integerrimus|evm.model.ctg017730_np12.77/A. integerrimus|evm.model.ctg021900_np12.57/A. integerrimus|evm.model.ctg027920_np12.9/A. …	131
GO:0006885	GO:0006885	regulation of pH	131/494	472/12875	8.29179092204497e-79	2.5379790047226e-76	2.21114424587866e-76	A. integerrimus|evm.model.ctg018490_np12.36/A. integerrimus|evm.model.ctg004570_np12.112/A. integerrimus|evm.model.ctg030440_np12.146/A. integerrimus|evm.model.ctg022020_np12.25/A. integerrimus|evm.model.ctg014950_np12.49/A. integerrimus|evm.model.ctg015350_np12.9/A. integerrimus|evm.model.ctg017730_np12.77/A. integerrimus|evm.model.ctg021900_np12.57/A. integerrimus|evm.model.ctg027920_np12.9/A. …	131
GO:0030672	GO:0030672	synaptic vesicle membrane	131/494	482/12875	1.52572494720668e-77	4.31075979314625e-75	3.75563063927798e-75	A. integerrimus|evm.model.ctg018490_np12.36/A. integerrimus|evm.model.ctg004570_np12.112/A. integerrimus|evm.model.ctg030440_np12.146/A. integerrimus|evm.model.ctg022020_np12.25/A. integerrimus|evm.model.ctg014950_np12.49/A. integerrimus|evm.model.ctg015350_np12.9/A. integerrimus|evm.model.ctg017730_np12.77/A. integerrimus|evm.model.ctg021900_np12.57/A. integerrimus|evm.model.ctg027920_np12.9/A. …	131
GO:0099501	GO:0099501	exocytic vesicle membrane	131/494	483/12875	2.03273489942956e-77	5.33302520400341e-75	4.64625119869613e-75	A. integerrimus|evm.model.ctg018490_np12.36/A. integerrimus|evm.model.ctg004570_np12.112/A. integerrimus|evm.model.ctg030440_np12.146/A. integerrimus|evm.model.ctg022020_np12.25/A. integerrimus|evm.model.ctg014950_np12.49/A. integerrimus|evm.model.ctg015350_np12.9/A. integerrimus|evm.model.ctg017730_np12.77/A. integerrimus|evm.model.ctg021900_np12.57/A. integerrimus|evm.model.ctg027920_np12.9/A. …	131
GO:0055067	GO:0055067	GO:0055067	131/494	488/12875	8.43554857395058e-77	2.06558466080803e-74	1.79958369577612e-74	A. integerrimus|evm.model.ctg018490_np12.36/A. integerrimus|evm.model.ctg004570_np12.112/A. integerrimus|evm.model.ctg030440_np12.146/A. integerrimus|evm.model.ctg022020_np12.25/A. integerrimus|evm.model.ctg014950_np12.49/A. integerrimus|evm.model.ctg015350_np12.9/A. integerrimus|evm.model.ctg017730_np12.77/A. integerrimus|evm.model.ctg021900_np12.57/A. integerrimus|evm.model.ctg027920_np12.9/A. …	131
GO:0005328	GO:0005328	neurotransmitter:sodium symporter activity	34/494	47/12875	2.07829262446928e-38	4.7709805060473e-36	4.15658524893856e-36	A. integerrimus|evm.model.ctg021930_np12.128/A. integerrimus|evm.model.ctg018440_np12.504/A. integerrimus|evm.model.ctg030550_np12.192/A. integerrimus|evm.model.ctg005780_np12.111/A. integerrimus|evm.model.ctg013130_np12.25/A. integerrimus|evm.model.ctg011570_np12.114/A. integerrimus|evm.model.ctg012130_np12.70/A. integerrimus|evm.model.ctg024520_np12.507/A. integerrimus|evm.model.ctg014310_np12.…	34
GO:0008514	GO:0008514	organic anion transmembrane transporter activity	80/494	378/12875	1.15902000660458e-37	2.50416499074036e-35	2.1816847183145e-35	A. integerrimus|evm.model.ctg021930_np12.128/A. integerrimus|evm.model.ctg018440_np12.504/A. integerrimus|evm.model.ctg030550_np12.192/A. integerrimus|evm.model.ctg005780_np12.111/A. integerrimus|evm.model.ctg013130_np12.25/A. integerrimus|evm.model.ctg012130_np12.70/A. integerrimus|evm.model.ctg024520_np12.507/A. integerrimus|evm.model.ctg015380_np12.3/A. integerrimus|evm.model.ctg022290_np12.55…	80
GO:0005326	GO:0005326	neurotransmitter transmembrane transporter activity	34/494	74/12875	7.78758399522192e-29	1.58909977858056e-26	1.38445937692834e-26	A. integerrimus|evm.model.ctg021930_np12.128/A. integerrimus|evm.model.ctg018440_np12.504/A. integerrimus|evm.model.ctg030550_np12.192/A. integerrimus|evm.model.ctg005780_np12.111/A. integerrimus|evm.model.ctg013130_np12.25/A. integerrimus|evm.model.ctg011570_np12.114/A. integerrimus|evm.model.ctg012130_np12.70/A. integerrimus|evm.model.ctg024520_np12.507/A. integerrimus|evm.model.ctg014310_np12.…	34
GO:0015175	GO:0015175	neutral L-amino acid transmembrane transporter activity	26/494	38/12875	1.41299927123138e-28	2.73155069643835e-26	2.37978824628443e-26	A. integerrimus|evm.model.ctg021930_np12.128/A. integerrimus|evm.model.ctg018440_np12.504/A. integerrimus|evm.model.ctg030550_np12.192/A. integerrimus|evm.model.ctg005780_np12.111/A. integerrimus|evm.model.ctg015380_np12.3/A. integerrimus|evm.model.ctg022290_np12.55/A. integerrimus|evm.model.ctg028100_np12.31/A. integerrimus|evm.model.ctg020310_np12.29/A. integerrimus|evm.model.ctg016780_np12.92/…	26
GO:0015732	GO:0015732	prostaglandin transport	19/494	19/12875	8.89488081037152e-28	1.63354486082473e-25	1.42318092965944e-25	A. integerrimus|evm.model.ctg015520_np12.6/A. integerrimus|evm.model.ctg029050_np12.204/A. integerrimus|evm.model.ctg018280_np12.28/A. integerrimus|evm.model.ctg029050_np12.193/A. integerrimus|evm.model.ctg019620_np12.254/A. integerrimus|evm.model.ctg019620_np12.252/A. integerrimus|evm.model.ctg019620_np12.263/A. integerrimus|evm.model.ctg017440_np12.6/A. integerrimus|evm.model.ctg015860_np12.1/A…	19
GO:0043225	GO:0043225	ATPase-coupled inorganic anion transmembrane transporter activity	19/494	21/12875	1.73909779558636e-25	2.90350281963122e-23	2.52959679358016e-23	A. integerrimus|evm.model.ctg015520_np12.6/A. integerrimus|evm.model.ctg029050_np12.204/A. integerrimus|evm.model.ctg018280_np12.28/A. integerrimus|evm.model.ctg029050_np12.193/A. integerrimus|evm.model.ctg019620_np12.254/A. integerrimus|evm.model.ctg019620_np12.252/A. integerrimus|evm.model.ctg019620_np12.263/A. integerrimus|evm.model.ctg017440_np12.6/A. integerrimus|evm.model.ctg015860_np12.1/A…	19
GO:0099133	GO:0099133	GO:0099133	19/494	21/12875	1.73909779558636e-25	2.90350281963122e-23	2.52959679358016e-23	A. integerrimus|evm.model.ctg015520_np12.6/A. integerrimus|evm.model.ctg029050_np12.204/A. integerrimus|evm.model.ctg018280_np12.28/A. integerrimus|evm.model.ctg029050_np12.193/A. integerrimus|evm.model.ctg019620_np12.254/A. integerrimus|evm.model.ctg019620_np12.252/A. integerrimus|evm.model.ctg019620_np12.263/A. integerrimus|evm.model.ctg017440_np12.6/A. integerrimus|evm.model.ctg015860_np12.1/A…	19
GO:0004970	GO:0004970	ionotropic glutamate receptor activity	53/494	272/12875	3.12934018277545e-23	4.99742021362357e-21	4.35386460212236e-21	A. integerrimus|evm.model.ctg018440_np12.241/A. integerrimus|evm.model.ctg027350_np12.137/A. integerrimus|evm.model.ctg027350_np12.170/A. integerrimus|evm.model.ctg025520_np12.3/A. integerrimus|evm.model.ctg024540_np12.157/A. integerrimus|evm.model.ctg019070_np12.14/A. integerrimus|evm.model.ctg019070_np12.34/A. integerrimus|evm.model.ctg025520_np12.5/A. integerrimus|evm.model.ctg025520_np12.7/A.…	53
GO:0015193	GO:0015193	L-proline transmembrane transporter activity	17/494	19/12875	1.03120809833735e-22	1.45677974815119e-20	1.26917919795367e-20	A. integerrimus|evm.model.ctg015380_np12.3/A. integerrimus|evm.model.ctg022290_np12.55/A. integerrimus|evm.model.ctg028100_np12.31/A. integerrimus|evm.model.ctg020310_np12.29/A. integerrimus|evm.model.ctg016780_np12.92/A. integerrimus|evm.model.ctg024200_np12.230/A. integerrimus|evm.model.ctg016780_np12.66/A. integerrimus|evm.model.ctg001280_np12.17/A. integerrimus|evm.model.ctg020460_np12.86/A. …	17
GO:0015824	GO:0015824	proline transport	17/494	19/12875	1.03120809833735e-22	1.45677974815119e-20	1.26917919795367e-20	A. integerrimus|evm.model.ctg015380_np12.3/A. integerrimus|evm.model.ctg022290_np12.55/A. integerrimus|evm.model.ctg028100_np12.31/A. integerrimus|evm.model.ctg020310_np12.29/A. integerrimus|evm.model.ctg016780_np12.92/A. integerrimus|evm.model.ctg024200_np12.230/A. integerrimus|evm.model.ctg016780_np12.66/A. integerrimus|evm.model.ctg001280_np12.17/A. integerrimus|evm.model.ctg020460_np12.86/A. …	17
GO:0035524	GO:0035524	proline transmembrane transport	17/494	19/12875	1.03120809833735e-22	1.45677974815119e-20	1.26917919795367e-20	A. integerrimus|evm.model.ctg015380_np12.3/A. integerrimus|evm.model.ctg022290_np12.55/A. integerrimus|evm.model.ctg028100_np12.31/A. integerrimus|evm.model.ctg020310_np12.29/A. integerrimus|evm.model.ctg016780_np12.92/A. integerrimus|evm.model.ctg024200_np12.230/A. integerrimus|evm.model.ctg016780_np12.66/A. integerrimus|evm.model.ctg001280_np12.17/A. integerrimus|evm.model.ctg020460_np12.86/A. …	17
GO:0006855	GO:0006855	xenobiotic transmembrane transport	41/494	164/12875	1.81122744125971e-22	2.41336899151099e-20	2.10258120687046e-20	A. integerrimus|evm.model.ctg011570_np12.114/A. integerrimus|evm.model.ctg012130_np12.70/A. integerrimus|evm.model.ctg014310_np12.80/A. integerrimus|evm.model.ctg015380_np12.3/A. integerrimus|evm.model.ctg022290_np12.55/A. integerrimus|evm.model.ctg028100_np12.31/A. integerrimus|evm.model.ctg020310_np12.29/A. integerrimus|evm.model.ctg016780_np12.92/A. integerrimus|evm.model.ctg024200_np12.230/A.…	41
GO:0035235	GO:0035235	ionotropic glutamate receptor signaling pathway	53/494	282/12875	1.83975855601165e-22	2.41336899151099e-20	2.10258120687046e-20	A. integerrimus|evm.model.ctg018440_np12.241/A. integerrimus|evm.model.ctg027350_np12.137/A. integerrimus|evm.model.ctg027350_np12.170/A. integerrimus|evm.model.ctg025520_np12.3/A. integerrimus|evm.model.ctg024540_np12.157/A. integerrimus|evm.model.ctg019070_np12.14/A. integerrimus|evm.model.ctg019070_np12.34/A. integerrimus|evm.model.ctg025520_np12.5/A. integerrimus|evm.model.ctg025520_np12.7/A.…	53
GO:0008066	GO:0008066	glutamate receptor activity	53/494	286/12875	3.65051556688574e-22	4.62356678523149e-20	4.02815510828771e-20	A. integerrimus|evm.model.ctg018440_np12.241/A. integerrimus|evm.model.ctg027350_np12.137/A. integerrimus|evm.model.ctg027350_np12.170/A. integerrimus|evm.model.ctg025520_np12.3/A. integerrimus|evm.model.ctg024540_np12.157/A. integerrimus|evm.model.ctg019070_np12.14/A. integerrimus|evm.model.ctg019070_np12.34/A. integerrimus|evm.model.ctg025520_np12.5/A. integerrimus|evm.model.ctg025520_np12.7/A.…	53
GO:0015804	GO:0015804	neutral amino acid transport	26/494	59/12875	9.76109673498973e-22	1.19508361025391e-19	1.04118365173224e-19	A. integerrimus|evm.model.ctg021930_np12.128/A. integerrimus|evm.model.ctg018440_np12.504/A. integerrimus|evm.model.ctg030550_np12.192/A. integerrimus|evm.model.ctg005780_np12.111/A. integerrimus|evm.model.ctg015380_np12.3/A. integerrimus|evm.model.ctg022290_np12.55/A. integerrimus|evm.model.ctg028100_np12.31/A. integerrimus|evm.model.ctg020310_np12.29/A. integerrimus|evm.model.ctg016780_np12.92/…	26
GO:0015370	GO:0015370	solute:sodium symporter activity	34/494	114/12875	1.64917457600626e-21	1.95400587666806e-19	1.70237375587743e-19	A. integerrimus|evm.model.ctg021930_np12.128/A. integerrimus|evm.model.ctg018440_np12.504/A. integerrimus|evm.model.ctg030550_np12.192/A. integerrimus|evm.model.ctg005780_np12.111/A. integerrimus|evm.model.ctg013130_np12.25/A. integerrimus|evm.model.ctg011570_np12.114/A. integerrimus|evm.model.ctg012130_np12.70/A. integerrimus|evm.model.ctg024520_np12.507/A. integerrimus|evm.model.ctg014310_np12.…	34
GO:0007215	GO:0007215	glutamate receptor signaling pathway	53/494	305/12875	8.0038771666232e-21	9.18695026031469e-19	8.0038771666232e-19	A. integerrimus|evm.model.ctg018440_np12.241/A. integerrimus|evm.model.ctg027350_np12.137/A. integerrimus|evm.model.ctg027350_np12.170/A. integerrimus|evm.model.ctg025520_np12.3/A. integerrimus|evm.model.ctg024540_np12.157/A. integerrimus|evm.model.ctg019070_np12.14/A. integerrimus|evm.model.ctg019070_np12.34/A. integerrimus|evm.model.ctg025520_np12.5/A. integerrimus|evm.model.ctg025520_np12.7/A.…	53
GO:0006836	GO:0006836	neurotransmitter transport	50/494	273/12875	1.01043671985512e-20	1.12464668849329e-18	9.79817425314055e-19	A. integerrimus|evm.model.ctg021930_np12.128/A. integerrimus|evm.model.ctg018440_np12.504/A. integerrimus|evm.model.ctg030550_np12.192/A. integerrimus|evm.model.ctg005780_np12.111/A. integerrimus|evm.model.ctg013130_np12.25/A. integerrimus|evm.model.ctg011570_np12.114/A. integerrimus|evm.model.ctg012130_np12.70/A. integerrimus|evm.model.ctg024520_np12.507/A. integerrimus|evm.model.ctg014310_np12.…	50
GO:0015127	GO:0015127	bilirubin transmembrane transporter activity	14/494	14/12875	1.25327426626696e-20	1.1803272769227e-18	1.02832760309084e-18	A. integerrimus|evm.model.ctg015520_np12.6/A. integerrimus|evm.model.ctg029050_np12.204/A. integerrimus|evm.model.ctg018280_np12.28/A. integerrimus|evm.model.ctg029050_np12.193/A. integerrimus|evm.model.ctg019620_np12.254/A. integerrimus|evm.model.ctg019620_np12.252/A. integerrimus|evm.model.ctg019620_np12.263/A. integerrimus|evm.model.ctg017440_np12.6/A. integerrimus|evm.model.ctg015860_np12.1/A…	14
GO:0015694	GO:0015694	mercury ion transport	14/494	14/12875	1.25327426626696e-20	1.1803272769227e-18	1.02832760309084e-18	A. integerrimus|evm.model.ctg015520_np12.6/A. integerrimus|evm.model.ctg029050_np12.204/A. integerrimus|evm.model.ctg018280_np12.28/A. integerrimus|evm.model.ctg029050_np12.193/A. integerrimus|evm.model.ctg019620_np12.254/A. integerrimus|evm.model.ctg019620_np12.252/A. integerrimus|evm.model.ctg019620_np12.263/A. integerrimus|evm.model.ctg017440_np12.6/A. integerrimus|evm.model.ctg015860_np12.1/A…	14
GO:0015723	GO:0015723	bilirubin transport	14/494	14/12875	1.25327426626696e-20	1.1803272769227e-18	1.02832760309084e-18	A. integerrimus|evm.model.ctg015520_np12.6/A. integerrimus|evm.model.ctg029050_np12.204/A. integerrimus|evm.model.ctg018280_np12.28/A. integerrimus|evm.model.ctg029050_np12.193/A. integerrimus|evm.model.ctg019620_np12.254/A. integerrimus|evm.model.ctg019620_np12.252/A. integerrimus|evm.model.ctg019620_np12.263/A. integerrimus|evm.model.ctg017440_np12.6/A. integerrimus|evm.model.ctg015860_np12.1/A…	14
GO:0030653	GO:0030653	beta-lactam antibiotic metabolic process	14/494	14/12875	1.25327426626696e-20	1.1803272769227e-18	1.02832760309084e-18	A. integerrimus|evm.model.ctg015520_np12.6/A. integerrimus|evm.model.ctg029050_np12.204/A. integerrimus|evm.model.ctg018280_np12.28/A. integerrimus|evm.model.ctg029050_np12.193/A. integerrimus|evm.model.ctg019620_np12.254/A. integerrimus|evm.model.ctg019620_np12.252/A. integerrimus|evm.model.ctg019620_np12.263/A. integerrimus|evm.model.ctg017440_np12.6/A. integerrimus|evm.model.ctg015860_np12.1/A…	14
GO:0042316	GO:0042316	penicillin metabolic process	14/494	14/12875	1.25327426626696e-20	1.1803272769227e-18	1.02832760309084e-18	A. integerrimus|evm.model.ctg015520_np12.6/A. integerrimus|evm.model.ctg029050_np12.204/A. integerrimus|evm.model.ctg018280_np12.28/A. integerrimus|evm.model.ctg029050_np12.193/A. integerrimus|evm.model.ctg019620_np12.254/A. integerrimus|evm.model.ctg019620_np12.252/A. integerrimus|evm.model.ctg019620_np12.263/A. integerrimus|evm.model.ctg017440_np12.6/A. integerrimus|evm.model.ctg015860_np12.1/A…	14
GO:1901086	GO:1901086	benzylpenicillin metabolic process	14/494	14/12875	1.25327426626696e-20	1.1803272769227e-18	1.02832760309084e-18	A. integerrimus|evm.model.ctg015520_np12.6/A. integerrimus|evm.model.ctg029050_np12.204/A. integerrimus|evm.model.ctg018280_np12.28/A. integerrimus|evm.model.ctg029050_np12.193/A. integerrimus|evm.model.ctg019620_np12.254/A. integerrimus|evm.model.ctg019620_np12.252/A. integerrimus|evm.model.ctg019620_np12.263/A. integerrimus|evm.model.ctg017440_np12.6/A. integerrimus|evm.model.ctg015860_np12.1/A…	14
GO:0071715	GO:0071715	icosanoid transport	19/494	30/12875	3.27996597121584e-20	2.93836951518921e-18	2.55997344094895e-18	A. integerrimus|evm.model.ctg015520_np12.6/A. integerrimus|evm.model.ctg029050_np12.204/A. integerrimus|evm.model.ctg018280_np12.28/A. integerrimus|evm.model.ctg029050_np12.193/A. integerrimus|evm.model.ctg019620_np12.254/A. integerrimus|evm.model.ctg019620_np12.252/A. integerrimus|evm.model.ctg019620_np12.263/A. integerrimus|evm.model.ctg017440_np12.6/A. integerrimus|evm.model.ctg015860_np12.1/A…	19
GO:1901571	GO:1901571	fatty acid derivative transport	19/494	30/12875	3.27996597121584e-20	2.93836951518921e-18	2.55997344094895e-18	A. integerrimus|evm.model.ctg015520_np12.6/A. integerrimus|evm.model.ctg029050_np12.204/A. integerrimus|evm.model.ctg018280_np12.28/A. integerrimus|evm.model.ctg029050_np12.193/A. integerrimus|evm.model.ctg019620_np12.254/A. integerrimus|evm.model.ctg019620_np12.252/A. integerrimus|evm.model.ctg019620_np12.263/A. integerrimus|evm.model.ctg017440_np12.6/A. integerrimus|evm.model.ctg015860_np12.1/A…	19
GO:1903344	GO:1903344	regulation of protein polyglycylation	15/494	17/12875	5.92488400223147e-20	4.94593157731732e-18	4.30900654707744e-18	A. integerrimus|evm.model.ctg015380_np12.3/A. integerrimus|evm.model.ctg022290_np12.55/A. integerrimus|evm.model.ctg028100_np12.31/A. integerrimus|evm.model.ctg020310_np12.29/A. integerrimus|evm.model.ctg016780_np12.92/A. integerrimus|evm.model.ctg024200_np12.230/A. integerrimus|evm.model.ctg016780_np12.66/A. integerrimus|evm.model.ctg001280_np12.17/A. integerrimus|evm.model.ctg020460_np12.86/A. …	15
GO:1903346	GO:1903346	positive regulation of protein polyglycylation	15/494	17/12875	5.92488400223147e-20	4.94593157731732e-18	4.30900654707744e-18	A. integerrimus|evm.model.ctg015380_np12.3/A. integerrimus|evm.model.ctg022290_np12.55/A. integerrimus|evm.model.ctg028100_np12.31/A. integerrimus|evm.model.ctg020310_np12.29/A. integerrimus|evm.model.ctg016780_np12.92/A. integerrimus|evm.model.ctg024200_np12.230/A. integerrimus|evm.model.ctg016780_np12.66/A. integerrimus|evm.model.ctg001280_np12.17/A. integerrimus|evm.model.ctg020460_np12.86/A. …	15
GO:1903804	GO:1903804	glycine import across plasma membrane	15/494	17/12875	5.92488400223147e-20	4.94593157731732e-18	4.30900654707744e-18	A. integerrimus|evm.model.ctg015380_np12.3/A. integerrimus|evm.model.ctg022290_np12.55/A. integerrimus|evm.model.ctg028100_np12.31/A. integerrimus|evm.model.ctg020310_np12.29/A. integerrimus|evm.model.ctg016780_np12.92/A. integerrimus|evm.model.ctg024200_np12.230/A. integerrimus|evm.model.ctg016780_np12.66/A. integerrimus|evm.model.ctg001280_np12.17/A. integerrimus|evm.model.ctg020460_np12.86/A. …	15
GO:0046943	GO:0046943	carboxylic acid transmembrane transporter activity	44/494	222/12875	9.73864593255078e-20	7.948899224502e-18	6.92525932981389e-18	A. integerrimus|evm.model.ctg021930_np12.128/A. integerrimus|evm.model.ctg018440_np12.504/A. integerrimus|evm.model.ctg030550_np12.192/A. integerrimus|evm.model.ctg005780_np12.111/A. integerrimus|evm.model.ctg013130_np12.25/A. integerrimus|evm.model.ctg012130_np12.70/A. integerrimus|evm.model.ctg024520_np12.507/A. integerrimus|evm.model.ctg015380_np12.3/A. integerrimus|evm.model.ctg022290_np12.55…	44
GO:0022804	GO:0022804	active transmembrane transporter activity	62/494	435/12875	1.26764439672303e-19	1.01218649329646e-17	8.81839580329067e-18	A. integerrimus|evm.model.ctg021930_np12.128/A. integerrimus|evm.model.ctg018440_np12.504/A. integerrimus|evm.model.ctg030550_np12.192/A. integerrimus|evm.model.ctg005780_np12.111/A. integerrimus|evm.model.ctg013130_np12.25/A. integerrimus|evm.model.ctg011570_np12.114/A. integerrimus|evm.model.ctg012130_np12.70/A. integerrimus|evm.model.ctg024520_np12.507/A. integerrimus|evm.model.ctg014310_np12.…	62
GO:0005342	GO:0005342	organic acid transmembrane transporter activity	44/494	224/12875	1.40704583586401e-19	1.099591352155e-17	9.57988654205282e-18	A. integerrimus|evm.model.ctg021930_np12.128/A. integerrimus|evm.model.ctg018440_np12.504/A. integerrimus|evm.model.ctg030550_np12.192/A. integerrimus|evm.model.ctg005780_np12.111/A. integerrimus|evm.model.ctg013130_np12.25/A. integerrimus|evm.model.ctg012130_np12.70/A. integerrimus|evm.model.ctg024520_np12.507/A. integerrimus|evm.model.ctg015380_np12.3/A. integerrimus|evm.model.ctg022290_np12.55…	44
GO:0030644	GO:0030644	intracellular chloride ion homeostasis	14/494	15/12875	1.8144265765304e-19	1.36007935012167e-17	1.18493164181577e-17	A. integerrimus|evm.model.ctg015520_np12.6/A. integerrimus|evm.model.ctg029050_np12.204/A. integerrimus|evm.model.ctg018280_np12.28/A. integerrimus|evm.model.ctg029050_np12.193/A. integerrimus|evm.model.ctg019620_np12.254/A. integerrimus|evm.model.ctg019620_np12.252/A. integerrimus|evm.model.ctg019620_np12.263/A. integerrimus|evm.model.ctg017440_np12.6/A. integerrimus|evm.model.ctg015860_np12.1/A…	14
GO:0050787	GO:0050787	detoxification of mercury ion	14/494	15/12875	1.8144265765304e-19	1.36007935012167e-17	1.18493164181577e-17	A. integerrimus|evm.model.ctg015520_np12.6/A. integerrimus|evm.model.ctg029050_np12.204/A. integerrimus|evm.model.ctg018280_np12.28/A. integerrimus|evm.model.ctg029050_np12.193/A. integerrimus|evm.model.ctg019620_np12.254/A. integerrimus|evm.model.ctg019620_np12.252/A. integerrimus|evm.model.ctg019620_np12.263/A. integerrimus|evm.model.ctg017440_np12.6/A. integerrimus|evm.model.ctg015860_np12.1/A…	14
GO:0046942	GO:0046942	carboxylic acid transport	51/494	315/12875	1.10448909259326e-18	8.11357687419007e-17	7.06873019259685e-17	A. integerrimus|evm.model.ctg021930_np12.128/A. integerrimus|evm.model.ctg018440_np12.504/A. integerrimus|evm.model.ctg030550_np12.192/A. integerrimus|evm.model.ctg005780_np12.111/A. integerrimus|evm.model.ctg013130_np12.25/A. integerrimus|evm.model.ctg012130_np12.70/A. integerrimus|evm.model.ctg024520_np12.507/A. integerrimus|evm.model.ctg015380_np12.3/A. integerrimus|evm.model.ctg022290_np12.55…	51
GO:1905039	GO:1905039	carboxylic acid transmembrane transport	44/494	236/12875	1.17151301442209e-18	8.43719078818106e-17	7.35066989441312e-17	A. integerrimus|evm.model.ctg021930_np12.128/A. integerrimus|evm.model.ctg018440_np12.504/A. integerrimus|evm.model.ctg030550_np12.192/A. integerrimus|evm.model.ctg005780_np12.111/A. integerrimus|evm.model.ctg013130_np12.25/A. integerrimus|evm.model.ctg012130_np12.70/A. integerrimus|evm.model.ctg024520_np12.507/A. integerrimus|evm.model.ctg015380_np12.3/A. integerrimus|evm.model.ctg022290_np12.55…	44
GO:0015722	GO:0015722	canalicular bile acid transport	14/494	16/12875	1.40098275149877e-18	9.52927712269444e-17	8.30212000888162e-17	A. integerrimus|evm.model.ctg015520_np12.6/A. integerrimus|evm.model.ctg029050_np12.204/A. integerrimus|evm.model.ctg018280_np12.28/A. integerrimus|evm.model.ctg029050_np12.193/A. integerrimus|evm.model.ctg019620_np12.254/A. integerrimus|evm.model.ctg019620_np12.252/A. integerrimus|evm.model.ctg019620_np12.263/A. integerrimus|evm.model.ctg017440_np12.6/A. integerrimus|evm.model.ctg015860_np12.1/A…	14
GO:0055064	GO:0055064	chloride ion homeostasis	14/494	16/12875	1.40098275149877e-18	9.52927712269444e-17	8.30212000888162e-17	A. integerrimus|evm.model.ctg015520_np12.6/A. integerrimus|evm.model.ctg029050_np12.204/A. integerrimus|evm.model.ctg018280_np12.28/A. integerrimus|evm.model.ctg029050_np12.193/A. integerrimus|evm.model.ctg019620_np12.254/A. integerrimus|evm.model.ctg019620_np12.252/A. integerrimus|evm.model.ctg019620_np12.263/A. integerrimus|evm.model.ctg017440_np12.6/A. integerrimus|evm.model.ctg015860_np12.1/A…	14
GO:0070327	GO:0070327	thyroid hormone transport	14/494	16/12875	1.40098275149877e-18	9.52927712269444e-17	8.30212000888162e-17	A. integerrimus|evm.model.ctg015520_np12.6/A. integerrimus|evm.model.ctg029050_np12.204/A. integerrimus|evm.model.ctg018280_np12.28/A. integerrimus|evm.model.ctg029050_np12.193/A. integerrimus|evm.model.ctg019620_np12.254/A. integerrimus|evm.model.ctg019620_np12.252/A. integerrimus|evm.model.ctg019620_np12.263/A. integerrimus|evm.model.ctg017440_np12.6/A. integerrimus|evm.model.ctg015860_np12.1/A…	14
GO:0015849	GO:0015849	organic acid transport	51/494	317/12875	1.46334633925725e-18	9.62872188622527e-17	8.38875851781129e-17	A. integerrimus|evm.model.ctg021930_np12.128/A. integerrimus|evm.model.ctg018440_np12.504/A. integerrimus|evm.model.ctg030550_np12.192/A. integerrimus|evm.model.ctg005780_np12.111/A. integerrimus|evm.model.ctg013130_np12.25/A. integerrimus|evm.model.ctg012130_np12.70/A. integerrimus|evm.model.ctg024520_np12.507/A. integerrimus|evm.model.ctg015380_np12.3/A. integerrimus|evm.model.ctg022290_np12.55…	51
GO:0046689	GO:0046689	response to mercury ion	17/494	26/12875	1.46803274061698e-18	9.62872188622527e-17	8.38875851781129e-17	A. integerrimus|evm.model.ctg015520_np12.6/A. integerrimus|evm.model.ctg029050_np12.204/A. integerrimus|evm.model.ctg018280_np12.28/A. integerrimus|evm.model.ctg029050_np12.193/A. integerrimus|evm.model.ctg019620_np12.254/A. integerrimus|evm.model.ctg019620_np12.252/A. integerrimus|evm.model.ctg019620_np12.263/A. integerrimus|evm.model.ctg017440_np12.6/A. integerrimus|evm.model.ctg015860_np12.1/A…	17
GO:0015187	GO:0015187	glycine transmembrane transporter activity	15/494	19/12875	1.57274169426636e-18	9.95979352248334e-17	8.67719555457302e-17	A. integerrimus|evm.model.ctg015380_np12.3/A. integerrimus|evm.model.ctg022290_np12.55/A. integerrimus|evm.model.ctg028100_np12.31/A. integerrimus|evm.model.ctg020310_np12.29/A. integerrimus|evm.model.ctg016780_np12.92/A. integerrimus|evm.model.ctg024200_np12.230/A. integerrimus|evm.model.ctg016780_np12.66/A. integerrimus|evm.model.ctg001280_np12.17/A. integerrimus|evm.model.ctg020460_np12.86/A. …	15
GO:0015816	GO:0015816	glycine transport	15/494	19/12875	1.57274169426636e-18	9.95979352248334e-17	8.67719555457302e-17	A. integerrimus|evm.model.ctg015380_np12.3/A. integerrimus|evm.model.ctg022290_np12.55/A. integerrimus|evm.model.ctg028100_np12.31/A. integerrimus|evm.model.ctg020310_np12.29/A. integerrimus|evm.model.ctg016780_np12.92/A. integerrimus|evm.model.ctg024200_np12.230/A. integerrimus|evm.model.ctg016780_np12.66/A. integerrimus|evm.model.ctg001280_np12.17/A. integerrimus|evm.model.ctg020460_np12.86/A. …	15
GO:1903825	GO:1903825	organic acid transmembrane transport	44/494	238/12875	1.64464765361313e-18	1.02386285283407e-16	8.92012286705424e-17	A. integerrimus|evm.model.ctg021930_np12.128/A. integerrimus|evm.model.ctg018440_np12.504/A. integerrimus|evm.model.ctg030550_np12.192/A. integerrimus|evm.model.ctg005780_np12.111/A. integerrimus|evm.model.ctg013130_np12.25/A. integerrimus|evm.model.ctg012130_np12.70/A. integerrimus|evm.model.ctg024520_np12.507/A. integerrimus|evm.model.ctg015380_np12.3/A. integerrimus|evm.model.ctg022290_np12.55…	44
GO:0015171	GO:0015171	amino acid transmembrane transporter activity	30/494	106/12875	2.12786663747925e-18	1.30260902657688e-16	1.1348622066556e-16	A. integerrimus|evm.model.ctg021930_np12.128/A. integerrimus|evm.model.ctg018440_np12.504/A. integerrimus|evm.model.ctg030550_np12.192/A. integerrimus|evm.model.ctg005780_np12.111/A. integerrimus|evm.model.ctg013130_np12.25/A. integerrimus|evm.model.ctg012130_np12.70/A. integerrimus|evm.model.ctg024520_np12.507/A. integerrimus|evm.model.ctg015380_np12.3/A. integerrimus|evm.model.ctg022290_np12.55…	30
GO:0015893	GO:0015893	GO:0015893	41/494	210/12875	3.26453540116578e-18	1.96567844729212e-16	1.7125431612673e-16	A. integerrimus|evm.model.ctg011570_np12.114/A. integerrimus|evm.model.ctg012130_np12.70/A. integerrimus|evm.model.ctg014310_np12.80/A. integerrimus|evm.model.ctg015380_np12.3/A. integerrimus|evm.model.ctg022290_np12.55/A. integerrimus|evm.model.ctg028100_np12.31/A. integerrimus|evm.model.ctg020310_np12.29/A. integerrimus|evm.model.ctg016780_np12.92/A. integerrimus|evm.model.ctg024200_np12.230/A.…	41
GO:0050907	GO:0050907	detection of chemical stimulus involved in sensory perception	31/494	116/12875	3.57328888812615e-18	2.11688549775603e-16	1.84427813580705e-16	A. integerrimus|evm.model.ctg027350_np12.137/A. integerrimus|evm.model.ctg027350_np12.170/A. integerrimus|evm.model.ctg025520_np12.3/A. integerrimus|evm.model.ctg019070_np12.14/A. integerrimus|evm.model.ctg019070_np12.34/A. integerrimus|evm.model.ctg025520_np12.5/A. integerrimus|evm.model.ctg029080_np12.5/A. integerrimus|evm.model.ctg014250_np12.73/A. integerrimus|evm.model.ctg017650_np12.56/A. i…	31
GO:0097329	GO:0097329	response to antimetabolite	20/494	41/12875	4.17532940143568e-18	2.43428331610687e-16	2.12080223564987e-16	A. integerrimus|evm.model.ctg016130_np12.42/A. integerrimus|evm.model.ctg015520_np12.6/A. integerrimus|evm.model.ctg029050_np12.204/A. integerrimus|evm.model.ctg018280_np12.28/A. integerrimus|evm.model.ctg029050_np12.193/A. integerrimus|evm.model.ctg019620_np12.254/A. integerrimus|evm.model.ctg019620_np12.252/A. integerrimus|evm.model.ctg019620_np12.263/A. integerrimus|evm.model.ctg017440_np12.6/…	20
GO:0003333	GO:0003333	amino acid transmembrane transport	30/494	111/12875	8.90491670116247e-18	5.11058735052652e-16	4.45245835058123e-16	A. integerrimus|evm.model.ctg021930_np12.128/A. integerrimus|evm.model.ctg018440_np12.504/A. integerrimus|evm.model.ctg030550_np12.192/A. integerrimus|evm.model.ctg005780_np12.111/A. integerrimus|evm.model.ctg013130_np12.25/A. integerrimus|evm.model.ctg012130_np12.70/A. integerrimus|evm.model.ctg024520_np12.507/A. integerrimus|evm.model.ctg015380_np12.3/A. integerrimus|evm.model.ctg022290_np12.55…	30
GO:0022824	GO:0022824	transmitter-gated monoatomic ion channel activity	53/494	357/12875	1.14279977814805e-17	6.45769782328889e-16	5.62609121549808e-16	A. integerrimus|evm.model.ctg018440_np12.241/A. integerrimus|evm.model.ctg027350_np12.137/A. integerrimus|evm.model.ctg027350_np12.170/A. integerrimus|evm.model.ctg025520_np12.3/A. integerrimus|evm.model.ctg024540_np12.157/A. integerrimus|evm.model.ctg019070_np12.14/A. integerrimus|evm.model.ctg019070_np12.34/A. integerrimus|evm.model.ctg025520_np12.5/A. integerrimus|evm.model.ctg025520_np12.7/A.…	53
GO:0072338	GO:0072338	lactam metabolic process	14/494	18/12875	3.32800503895425e-17	1.85208522849681e-15	1.61357820070509e-15	A. integerrimus|evm.model.ctg015520_np12.6/A. integerrimus|evm.model.ctg029050_np12.204/A. integerrimus|evm.model.ctg018280_np12.28/A. integerrimus|evm.model.ctg029050_np12.193/A. integerrimus|evm.model.ctg019620_np12.254/A. integerrimus|evm.model.ctg019620_np12.252/A. integerrimus|evm.model.ctg019620_np12.263/A. integerrimus|evm.model.ctg017440_np12.6/A. integerrimus|evm.model.ctg015860_np12.1/A…	14
GO:0022835	GO:0022835	transmitter-gated channel activity	53/494	366/12875	3.46662293681478e-17	1.90043373834637e-15	1.65570050713542e-15	A. integerrimus|evm.model.ctg018440_np12.241/A. integerrimus|evm.model.ctg027350_np12.137/A. integerrimus|evm.model.ctg027350_np12.170/A. integerrimus|evm.model.ctg025520_np12.3/A. integerrimus|evm.model.ctg024540_np12.157/A. integerrimus|evm.model.ctg019070_np12.14/A. integerrimus|evm.model.ctg019070_np12.34/A. integerrimus|evm.model.ctg025520_np12.5/A. integerrimus|evm.model.ctg025520_np12.7/A.…	53
GO:0001504	GO:0001504	neurotransmitter uptake	20/494	47/12875	1.22226332766093e-16	6.60201941543911e-15	5.75182742428673e-15	A. integerrimus|evm.model.ctg011570_np12.114/A. integerrimus|evm.model.ctg014310_np12.80/A. integerrimus|evm.model.ctg015380_np12.3/A. integerrimus|evm.model.ctg022290_np12.55/A. integerrimus|evm.model.ctg028100_np12.31/A. integerrimus|evm.model.ctg020310_np12.29/A. integerrimus|evm.model.ctg016780_np12.92/A. integerrimus|evm.model.ctg024200_np12.230/A. integerrimus|evm.model.ctg016780_np12.66/A.…	20
GO:0015721	GO:0015721	bile acid and bile salt transport	15/494	23/12875	1.72594397755399e-16	9.05912170309053e-15	7.89251005986651e-15	A. integerrimus|evm.model.ctg015520_np12.6/A. integerrimus|evm.model.ctg029050_np12.204/A. integerrimus|evm.model.ctg018280_np12.28/A. integerrimus|evm.model.ctg029050_np12.193/A. integerrimus|evm.model.ctg019620_np12.254/A. integerrimus|evm.model.ctg019620_np12.252/A. integerrimus|evm.model.ctg019620_np12.263/A. integerrimus|evm.model.ctg017440_np12.6/A. integerrimus|evm.model.ctg015860_np12.1/A…	15
GO:0015276	GO:0015276	ligand-gated monoatomic ion channel activity	57/494	433/12875	1.75115066953288e-16	9.05912170309053e-15	7.89251005986651e-15	A. integerrimus|evm.model.ctg018440_np12.241/A. integerrimus|evm.model.ctg027350_np12.137/A. integerrimus|evm.model.ctg027350_np12.170/A. integerrimus|evm.model.ctg025520_np12.3/A. integerrimus|evm.model.ctg024540_np12.157/A. integerrimus|evm.model.ctg019070_np12.14/A. integerrimus|evm.model.ctg019070_np12.34/A. integerrimus|evm.model.ctg025520_np12.5/A. integerrimus|evm.model.ctg025520_np12.7/A.…	57
GO:0022834	GO:0022834	ligand-gated channel activity	57/494	433/12875	1.75115066953288e-16	9.05912170309053e-15	7.89251005986651e-15	A. integerrimus|evm.model.ctg018440_np12.241/A. integerrimus|evm.model.ctg027350_np12.137/A. integerrimus|evm.model.ctg027350_np12.170/A. integerrimus|evm.model.ctg025520_np12.3/A. integerrimus|evm.model.ctg024540_np12.157/A. integerrimus|evm.model.ctg019070_np12.14/A. integerrimus|evm.model.ctg019070_np12.34/A. integerrimus|evm.model.ctg025520_np12.5/A. integerrimus|evm.model.ctg025520_np12.7/A.…	57
GO:0015179	GO:0015179	L-amino acid transmembrane transporter activity	23/494	67/12875	1.80188638282431e-16	9.19212317238014e-15	8.00838392366361e-15	A. integerrimus|evm.model.ctg021930_np12.128/A. integerrimus|evm.model.ctg018440_np12.504/A. integerrimus|evm.model.ctg030550_np12.192/A. integerrimus|evm.model.ctg005780_np12.111/A. integerrimus|evm.model.ctg015380_np12.3/A. integerrimus|evm.model.ctg022290_np12.55/A. integerrimus|evm.model.ctg028100_np12.31/A. integerrimus|evm.model.ctg020310_np12.29/A. integerrimus|evm.model.ctg016780_np12.92/…	23
GO:0005230	GO:0005230	extracellular ligand-gated monoatomic ion channel activity	53/494	382/12875	2.27487130657013e-16	1.14460305603179e-14	9.97203860414304e-15	A. integerrimus|evm.model.ctg018440_np12.241/A. integerrimus|evm.model.ctg027350_np12.137/A. integerrimus|evm.model.ctg027350_np12.170/A. integerrimus|evm.model.ctg025520_np12.3/A. integerrimus|evm.model.ctg024540_np12.157/A. integerrimus|evm.model.ctg019070_np12.14/A. integerrimus|evm.model.ctg019070_np12.34/A. integerrimus|evm.model.ctg025520_np12.5/A. integerrimus|evm.model.ctg025520_np12.7/A.…	53
GO:0046581	GO:0046581	intercellular canaliculus	14/494	20/12875	3.9270189500438e-16	1.92319208046812e-14	1.67552808535202e-14	A. integerrimus|evm.model.ctg015520_np12.6/A. integerrimus|evm.model.ctg029050_np12.204/A. integerrimus|evm.model.ctg018280_np12.28/A. integerrimus|evm.model.ctg029050_np12.193/A. integerrimus|evm.model.ctg019620_np12.254/A. integerrimus|evm.model.ctg019620_np12.252/A. integerrimus|evm.model.ctg019620_np12.263/A. integerrimus|evm.model.ctg017440_np12.6/A. integerrimus|evm.model.ctg015860_np12.1/A…	14
GO:0061687	GO:0061687	detoxification of inorganic compound	14/494	20/12875	3.9270189500438e-16	1.92319208046812e-14	1.67552808535202e-14	A. integerrimus|evm.model.ctg015520_np12.6/A. integerrimus|evm.model.ctg029050_np12.204/A. integerrimus|evm.model.ctg018280_np12.28/A. integerrimus|evm.model.ctg029050_np12.193/A. integerrimus|evm.model.ctg019620_np12.254/A. integerrimus|evm.model.ctg019620_np12.252/A. integerrimus|evm.model.ctg019620_np12.263/A. integerrimus|evm.model.ctg017440_np12.6/A. integerrimus|evm.model.ctg015860_np12.1/A…	14
GO:0030594	GO:0030594	neurotransmitter receptor activity	54/494	401/12875	4.33124958115387e-16	2.09324733047081e-14	1.82368403417005e-14	A. integerrimus|evm.model.ctg018440_np12.241/A. integerrimus|evm.model.ctg027350_np12.137/A. integerrimus|evm.model.ctg027350_np12.170/A. integerrimus|evm.model.ctg025520_np12.3/A. integerrimus|evm.model.ctg024540_np12.157/A. integerrimus|evm.model.ctg019070_np12.14/A. integerrimus|evm.model.ctg019070_np12.34/A. integerrimus|evm.model.ctg025520_np12.5/A. integerrimus|evm.model.ctg025520_np12.7/A.…	54
GO:0031427	GO:0031427	response to methotrexate	15/494	24/12875	4.44189168238684e-16	2.11884001940349e-14	1.84598095891401e-14	A. integerrimus|evm.model.ctg016130_np12.42/A. integerrimus|evm.model.ctg015520_np12.6/A. integerrimus|evm.model.ctg029050_np12.204/A. integerrimus|evm.model.ctg018280_np12.28/A. integerrimus|evm.model.ctg029050_np12.193/A. integerrimus|evm.model.ctg019620_np12.254/A. integerrimus|evm.model.ctg019620_np12.252/A. integerrimus|evm.model.ctg019620_np12.263/A. integerrimus|evm.model.ctg017440_np12.6/…	15
GO:0002636	GO:0002636	positive regulation of germinal center formation	12/494	14/12875	7.58529587167587e-16	3.27774020431359e-14	2.85564079874856e-14	A. integerrimus|evm.model.ctg028260_np12.18/A. integerrimus|evm.model.ctg023050_np12.152/A. integerrimus|evm.model.ctg021490_np12.5/A. integerrimus|evm.model.ctg011250_np12.10/A. integerrimus|evm.model.ctg009700_np12.70/A. integerrimus|evm.model.ctg019130_np12.40/A. integerrimus|evm.model.ctg017880_np12.76/A. integerrimus|evm.model.ctg019910_np12.15/A. integerrimus|evm.model.ctg021870_np12.37/A. …	12
GO:0006157	GO:0006157	deoxyadenosine catabolic process	12/494	14/12875	7.58529587167587e-16	3.27774020431359e-14	2.85564079874856e-14	A. integerrimus|evm.model.ctg028260_np12.18/A. integerrimus|evm.model.ctg023050_np12.152/A. integerrimus|evm.model.ctg021490_np12.5/A. integerrimus|evm.model.ctg011250_np12.10/A. integerrimus|evm.model.ctg009700_np12.70/A. integerrimus|evm.model.ctg019130_np12.40/A. integerrimus|evm.model.ctg017880_np12.76/A. integerrimus|evm.model.ctg019910_np12.15/A. integerrimus|evm.model.ctg021870_np12.37/A. …	12
GO:0042323	GO:0042323	negative regulation of circadian sleep/wake cycle, non-REM sleep	12/494	14/12875	7.58529587167587e-16	3.27774020431359e-14	2.85564079874856e-14	A. integerrimus|evm.model.ctg028260_np12.18/A. integerrimus|evm.model.ctg023050_np12.152/A. integerrimus|evm.model.ctg021490_np12.5/A. integerrimus|evm.model.ctg011250_np12.10/A. integerrimus|evm.model.ctg009700_np12.70/A. integerrimus|evm.model.ctg019130_np12.40/A. integerrimus|evm.model.ctg017880_np12.76/A. integerrimus|evm.model.ctg019910_np12.15/A. integerrimus|evm.model.ctg021870_np12.37/A. …	12
GO:0046090	GO:0046090	deoxyadenosine metabolic process	12/494	14/12875	7.58529587167587e-16	3.27774020431359e-14	2.85564079874856e-14	A. integerrimus|evm.model.ctg028260_np12.18/A. integerrimus|evm.model.ctg023050_np12.152/A. integerrimus|evm.model.ctg021490_np12.5/A. integerrimus|evm.model.ctg011250_np12.10/A. integerrimus|evm.model.ctg009700_np12.70/A. integerrimus|evm.model.ctg019130_np12.40/A. integerrimus|evm.model.ctg017880_np12.76/A. integerrimus|evm.model.ctg019910_np12.15/A. integerrimus|evm.model.ctg021870_np12.37/A. …	12
GO:0046111	GO:0046111	xanthine biosynthetic process	12/494	14/12875	7.58529587167587e-16	3.27774020431359e-14	2.85564079874856e-14	A. integerrimus|evm.model.ctg028260_np12.18/A. integerrimus|evm.model.ctg023050_np12.152/A. integerrimus|evm.model.ctg021490_np12.5/A. integerrimus|evm.model.ctg011250_np12.10/A. integerrimus|evm.model.ctg009700_np12.70/A. integerrimus|evm.model.ctg019130_np12.40/A. integerrimus|evm.model.ctg017880_np12.76/A. integerrimus|evm.model.ctg019910_np12.15/A. integerrimus|evm.model.ctg021870_np12.37/A. …	12
GO:0060169	GO:0060169	negative regulation of adenosine receptor signaling pathway	12/494	14/12875	7.58529587167587e-16	3.27774020431359e-14	2.85564079874856e-14	A. integerrimus|evm.model.ctg028260_np12.18/A. integerrimus|evm.model.ctg023050_np12.152/A. integerrimus|evm.model.ctg021490_np12.5/A. integerrimus|evm.model.ctg011250_np12.10/A. integerrimus|evm.model.ctg009700_np12.70/A. integerrimus|evm.model.ctg019130_np12.40/A. integerrimus|evm.model.ctg017880_np12.76/A. integerrimus|evm.model.ctg019910_np12.15/A. integerrimus|evm.model.ctg021870_np12.37/A. …	12
GO:0060407	GO:0060407	negative regulation of penile erection	12/494	14/12875	7.58529587167587e-16	3.27774020431359e-14	2.85564079874856e-14	A. integerrimus|evm.model.ctg028260_np12.18/A. integerrimus|evm.model.ctg023050_np12.152/A. integerrimus|evm.model.ctg021490_np12.5/A. integerrimus|evm.model.ctg011250_np12.10/A. integerrimus|evm.model.ctg009700_np12.70/A. integerrimus|evm.model.ctg019130_np12.40/A. integerrimus|evm.model.ctg017880_np12.76/A. integerrimus|evm.model.ctg019910_np12.15/A. integerrimus|evm.model.ctg021870_np12.37/A. …	12
GO:0070256	GO:0070256	negative regulation of mucus secretion	12/494	14/12875	7.58529587167587e-16	3.27774020431359e-14	2.85564079874856e-14	A. integerrimus|evm.model.ctg028260_np12.18/A. integerrimus|evm.model.ctg023050_np12.152/A. integerrimus|evm.model.ctg021490_np12.5/A. integerrimus|evm.model.ctg011250_np12.10/A. integerrimus|evm.model.ctg009700_np12.70/A. integerrimus|evm.model.ctg019130_np12.40/A. integerrimus|evm.model.ctg017880_np12.76/A. integerrimus|evm.model.ctg019910_np12.15/A. integerrimus|evm.model.ctg021870_np12.37/A. …	12
GO:1902475	GO:1902475	L-alpha-amino acid transmembrane transport	23/494	71/12875	7.79837299887908e-16	3.33063070056778e-14	2.90172018562943e-14	A. integerrimus|evm.model.ctg021930_np12.128/A. integerrimus|evm.model.ctg018440_np12.504/A. integerrimus|evm.model.ctg030550_np12.192/A. integerrimus|evm.model.ctg005780_np12.111/A. integerrimus|evm.model.ctg015380_np12.3/A. integerrimus|evm.model.ctg022290_np12.55/A. integerrimus|evm.model.ctg028100_np12.31/A. integerrimus|evm.model.ctg020310_np12.29/A. integerrimus|evm.model.ctg016780_np12.92/…	23
GO:0015807	GO:0015807	L-amino acid transport	23/494	73/12875	1.55750314065385e-15	6.57552762715125e-14	5.72874718401415e-14	A. integerrimus|evm.model.ctg021930_np12.128/A. integerrimus|evm.model.ctg018440_np12.504/A. integerrimus|evm.model.ctg030550_np12.192/A. integerrimus|evm.model.ctg005780_np12.111/A. integerrimus|evm.model.ctg015380_np12.3/A. integerrimus|evm.model.ctg022290_np12.55/A. integerrimus|evm.model.ctg028100_np12.31/A. integerrimus|evm.model.ctg020310_np12.29/A. integerrimus|evm.model.ctg016780_np12.92/…	23
GO:0015294	GO:0015294	solute:monoatomic cation symporter activity	34/494	173/12875	2.18313802819276e-15	9.11212042903638e-14	7.93868373888277e-14	A. integerrimus|evm.model.ctg021930_np12.128/A. integerrimus|evm.model.ctg018440_np12.504/A. integerrimus|evm.model.ctg030550_np12.192/A. integerrimus|evm.model.ctg005780_np12.111/A. integerrimus|evm.model.ctg013130_np12.25/A. integerrimus|evm.model.ctg011570_np12.114/A. integerrimus|evm.model.ctg012130_np12.70/A. integerrimus|evm.model.ctg024520_np12.507/A. integerrimus|evm.model.ctg014310_np12.…	34
GO:0030002	GO:0030002	intracellular monoatomic anion homeostasis	14/494	22/12875	3.0181400419819e-15	1.23173648602217e-13	1.07311645937134e-13	A. integerrimus|evm.model.ctg015520_np12.6/A. integerrimus|evm.model.ctg029050_np12.204/A. integerrimus|evm.model.ctg018280_np12.28/A. integerrimus|evm.model.ctg029050_np12.193/A. integerrimus|evm.model.ctg019620_np12.254/A. integerrimus|evm.model.ctg019620_np12.252/A. integerrimus|evm.model.ctg019620_np12.263/A. integerrimus|evm.model.ctg017440_np12.6/A. integerrimus|evm.model.ctg015860_np12.1/A…	14
GO:0030320	GO:0030320	GO:0030320	14/494	22/12875	3.0181400419819e-15	1.23173648602217e-13	1.07311645937134e-13	A. integerrimus|evm.model.ctg015520_np12.6/A. integerrimus|evm.model.ctg029050_np12.204/A. integerrimus|evm.model.ctg018280_np12.28/A. integerrimus|evm.model.ctg029050_np12.193/A. integerrimus|evm.model.ctg019620_np12.254/A. integerrimus|evm.model.ctg019620_np12.252/A. integerrimus|evm.model.ctg019620_np12.263/A. integerrimus|evm.model.ctg017440_np12.6/A. integerrimus|evm.model.ctg015860_np12.1/A…	14
GO:0015081	GO:0015081	sodium ion transmembrane transporter activity	38/494	219/12875	3.43766685632554e-15	1.37231519201577e-13	1.19559178177252e-13	A. integerrimus|evm.model.ctg021930_np12.128/A. integerrimus|evm.model.ctg018440_np12.504/A. integerrimus|evm.model.ctg030550_np12.192/A. integerrimus|evm.model.ctg005780_np12.111/A. integerrimus|evm.model.ctg013130_np12.25/A. integerrimus|evm.model.ctg011570_np12.114/A. integerrimus|evm.model.ctg012130_np12.70/A. integerrimus|evm.model.ctg024520_np12.507/A. integerrimus|evm.model.ctg014310_np12.…	38
GO:0035725	GO:0035725	sodium ion transmembrane transport	38/494	219/12875	3.43766685632554e-15	1.37231519201577e-13	1.19559178177252e-13	A. integerrimus|evm.model.ctg021930_np12.128/A. integerrimus|evm.model.ctg018440_np12.504/A. integerrimus|evm.model.ctg030550_np12.192/A. integerrimus|evm.model.ctg005780_np12.111/A. integerrimus|evm.model.ctg013130_np12.25/A. integerrimus|evm.model.ctg011570_np12.114/A. integerrimus|evm.model.ctg012130_np12.70/A. integerrimus|evm.model.ctg024520_np12.507/A. integerrimus|evm.model.ctg014310_np12.…	38
GO:0002314	GO:0002314	germinal center B cell differentiation	12/494	15/12875	3.66149983167833e-15	1.37231519201577e-13	1.19559178177252e-13	A. integerrimus|evm.model.ctg028260_np12.18/A. integerrimus|evm.model.ctg023050_np12.152/A. integerrimus|evm.model.ctg021490_np12.5/A. integerrimus|evm.model.ctg011250_np12.10/A. integerrimus|evm.model.ctg009700_np12.70/A. integerrimus|evm.model.ctg019130_np12.40/A. integerrimus|evm.model.ctg017880_np12.76/A. integerrimus|evm.model.ctg019910_np12.15/A. integerrimus|evm.model.ctg021870_np12.37/A. …	12
GO:0002905	GO:0002905	regulation of mature B cell apoptotic process	12/494	15/12875	3.66149983167833e-15	1.37231519201577e-13	1.19559178177252e-13	A. integerrimus|evm.model.ctg028260_np12.18/A. integerrimus|evm.model.ctg023050_np12.152/A. integerrimus|evm.model.ctg021490_np12.5/A. integerrimus|evm.model.ctg011250_np12.10/A. integerrimus|evm.model.ctg009700_np12.70/A. integerrimus|evm.model.ctg019130_np12.40/A. integerrimus|evm.model.ctg017880_np12.76/A. integerrimus|evm.model.ctg019910_np12.15/A. integerrimus|evm.model.ctg021870_np12.37/A. …	12
GO:0002906	GO:0002906	negative regulation of mature B cell apoptotic process	12/494	15/12875	3.66149983167833e-15	1.37231519201577e-13	1.19559178177252e-13	A. integerrimus|evm.model.ctg028260_np12.18/A. integerrimus|evm.model.ctg023050_np12.152/A. integerrimus|evm.model.ctg021490_np12.5/A. integerrimus|evm.model.ctg011250_np12.10/A. integerrimus|evm.model.ctg009700_np12.70/A. integerrimus|evm.model.ctg019130_np12.40/A. integerrimus|evm.model.ctg017880_np12.76/A. integerrimus|evm.model.ctg019910_np12.15/A. integerrimus|evm.model.ctg021870_np12.37/A. …	12
GO:0046122	GO:0046122	purine deoxyribonucleoside metabolic process	12/494	15/12875	3.66149983167833e-15	1.37231519201577e-13	1.19559178177252e-13	A. integerrimus|evm.model.ctg028260_np12.18/A. integerrimus|evm.model.ctg023050_np12.152/A. integerrimus|evm.model.ctg021490_np12.5/A. integerrimus|evm.model.ctg011250_np12.10/A. integerrimus|evm.model.ctg009700_np12.70/A. integerrimus|evm.model.ctg019130_np12.40/A. integerrimus|evm.model.ctg017880_np12.76/A. integerrimus|evm.model.ctg019910_np12.15/A. integerrimus|evm.model.ctg021870_np12.37/A. …	12
GO:0046124	GO:0046124	purine deoxyribonucleoside catabolic process	12/494	15/12875	3.66149983167833e-15	1.37231519201577e-13	1.19559178177252e-13	A. integerrimus|evm.model.ctg028260_np12.18/A. integerrimus|evm.model.ctg023050_np12.152/A. integerrimus|evm.model.ctg021490_np12.5/A. integerrimus|evm.model.ctg011250_np12.10/A. integerrimus|evm.model.ctg009700_np12.70/A. integerrimus|evm.model.ctg019130_np12.40/A. integerrimus|evm.model.ctg017880_np12.76/A. integerrimus|evm.model.ctg019910_np12.15/A. integerrimus|evm.model.ctg021870_np12.37/A. …	12
GO:0060167	GO:0060167	regulation of adenosine receptor signaling pathway	12/494	15/12875	3.66149983167833e-15	1.37231519201577e-13	1.19559178177252e-13	A. integerrimus|evm.model.ctg028260_np12.18/A. integerrimus|evm.model.ctg023050_np12.152/A. integerrimus|evm.model.ctg021490_np12.5/A. integerrimus|evm.model.ctg011250_np12.10/A. integerrimus|evm.model.ctg009700_np12.70/A. integerrimus|evm.model.ctg019130_np12.40/A. integerrimus|evm.model.ctg017880_np12.76/A. integerrimus|evm.model.ctg019910_np12.15/A. integerrimus|evm.model.ctg021870_np12.37/A. …	12
GO:0033197	GO:0033197	response to vitamin E	15/494	27/12875	5.30879238885149e-15	1.96961560042945e-13	1.71597329740654e-13	A. integerrimus|evm.model.ctg014950_np12.35/A. integerrimus|evm.model.ctg016670_np12.1/A. integerrimus|evm.model.ctg004810_np12.285/A. integerrimus|evm.model.ctg028260_np12.18/A. integerrimus|evm.model.ctg023050_np12.152/A. integerrimus|evm.model.ctg021490_np12.5/A. integerrimus|evm.model.ctg011250_np12.10/A. integerrimus|evm.model.ctg009700_np12.70/A. integerrimus|evm.model.ctg019130_np12.40/A. …	15
GO:0006865	GO:0006865	amino acid transport	30/494	139/12875	7.1776097755847e-15	2.63633607057226e-13	2.29683512818711e-13	A. integerrimus|evm.model.ctg021930_np12.128/A. integerrimus|evm.model.ctg018440_np12.504/A. integerrimus|evm.model.ctg030550_np12.192/A. integerrimus|evm.model.ctg005780_np12.111/A. integerrimus|evm.model.ctg013130_np12.25/A. integerrimus|evm.model.ctg012130_np12.70/A. integerrimus|evm.model.ctg024520_np12.507/A. integerrimus|evm.model.ctg015380_np12.3/A. integerrimus|evm.model.ctg022290_np12.55…	30
GO:0009593	GO:0009593	detection of chemical stimulus	38/494	228/12875	1.33068910033592e-14	4.83922877775628e-13	4.21604467433164e-13	A. integerrimus|evm.model.ctg018440_np12.241/A. integerrimus|evm.model.ctg027350_np12.137/A. integerrimus|evm.model.ctg027350_np12.170/A. integerrimus|evm.model.ctg025520_np12.3/A. integerrimus|evm.model.ctg024540_np12.157/A. integerrimus|evm.model.ctg019070_np12.14/A. integerrimus|evm.model.ctg019070_np12.34/A. integerrimus|evm.model.ctg025520_np12.5/A. integerrimus|evm.model.ctg026500_np12.35/A…	38
GO:0006154	GO:0006154	adenosine catabolic process	12/494	16/12875	1.41396196858447e-14	4.9937329909719e-13	4.35065221102915e-13	A. integerrimus|evm.model.ctg028260_np12.18/A. integerrimus|evm.model.ctg023050_np12.152/A. integerrimus|evm.model.ctg021490_np12.5/A. integerrimus|evm.model.ctg011250_np12.10/A. integerrimus|evm.model.ctg009700_np12.70/A. integerrimus|evm.model.ctg019130_np12.40/A. integerrimus|evm.model.ctg017880_np12.76/A. integerrimus|evm.model.ctg019910_np12.15/A. integerrimus|evm.model.ctg021870_np12.37/A. …	12
GO:0043096	GO:0043096	purine nucleobase salvage	12/494	16/12875	1.41396196858447e-14	4.9937329909719e-13	4.35065221102915e-13	A. integerrimus|evm.model.ctg028260_np12.18/A. integerrimus|evm.model.ctg023050_np12.152/A. integerrimus|evm.model.ctg021490_np12.5/A. integerrimus|evm.model.ctg011250_np12.10/A. integerrimus|evm.model.ctg009700_np12.70/A. integerrimus|evm.model.ctg019130_np12.40/A. integerrimus|evm.model.ctg017880_np12.76/A. integerrimus|evm.model.ctg019910_np12.15/A. integerrimus|evm.model.ctg021870_np12.37/A. …	12
GO:0043103	GO:0043103	hypoxanthine salvage	12/494	16/12875	1.41396196858447e-14	4.9937329909719e-13	4.35065221102915e-13	A. integerrimus|evm.model.ctg028260_np12.18/A. integerrimus|evm.model.ctg023050_np12.152/A. integerrimus|evm.model.ctg021490_np12.5/A. integerrimus|evm.model.ctg011250_np12.10/A. integerrimus|evm.model.ctg009700_np12.70/A. integerrimus|evm.model.ctg019130_np12.40/A. integerrimus|evm.model.ctg017880_np12.76/A. integerrimus|evm.model.ctg019910_np12.15/A. integerrimus|evm.model.ctg021870_np12.37/A. …	12
GO:0015293	GO:0015293	symporter activity	34/494	186/12875	2.09162394210837e-14	7.31669975177527e-13	6.3744729664255e-13	A. integerrimus|evm.model.ctg021930_np12.128/A. integerrimus|evm.model.ctg018440_np12.504/A. integerrimus|evm.model.ctg030550_np12.192/A. integerrimus|evm.model.ctg005780_np12.111/A. integerrimus|evm.model.ctg013130_np12.25/A. integerrimus|evm.model.ctg011570_np12.114/A. integerrimus|evm.model.ctg012130_np12.70/A. integerrimus|evm.model.ctg024520_np12.507/A. integerrimus|evm.model.ctg014310_np12.…	34
GO:0006814	GO:0006814	sodium ion transport	38/494	234/12875	3.15271527401646e-14	1.09244558504363e-12	9.51763101589875e-13	A. integerrimus|evm.model.ctg021930_np12.128/A. integerrimus|evm.model.ctg018440_np12.504/A. integerrimus|evm.model.ctg030550_np12.192/A. integerrimus|evm.model.ctg005780_np12.111/A. integerrimus|evm.model.ctg013130_np12.25/A. integerrimus|evm.model.ctg011570_np12.114/A. integerrimus|evm.model.ctg012130_np12.70/A. integerrimus|evm.model.ctg024520_np12.507/A. integerrimus|evm.model.ctg014310_np12.…	38
GO:0071354	GO:0071354	cellular response to interleukin-6	14/494	25/12875	3.78292682126483e-14	1.29856917892577e-12	1.1313426007521e-12	A. integerrimus|evm.model.ctg015520_np12.6/A. integerrimus|evm.model.ctg029050_np12.204/A. integerrimus|evm.model.ctg018280_np12.28/A. integerrimus|evm.model.ctg029050_np12.193/A. integerrimus|evm.model.ctg019620_np12.254/A. integerrimus|evm.model.ctg019620_np12.252/A. integerrimus|evm.model.ctg019620_np12.263/A. integerrimus|evm.model.ctg017440_np12.6/A. integerrimus|evm.model.ctg015860_np12.1/A…	14
GO:0001821	GO:0001821	histamine secretion	12/494	17/12875	4.64127829327581e-14	1.5220906402859e-12	1.32607951236452e-12	A. integerrimus|evm.model.ctg028260_np12.18/A. integerrimus|evm.model.ctg023050_np12.152/A. integerrimus|evm.model.ctg021490_np12.5/A. integerrimus|evm.model.ctg011250_np12.10/A. integerrimus|evm.model.ctg009700_np12.70/A. integerrimus|evm.model.ctg019130_np12.40/A. integerrimus|evm.model.ctg017880_np12.76/A. integerrimus|evm.model.ctg019910_np12.15/A. integerrimus|evm.model.ctg021870_np12.37/A. …	12
GO:0033632	GO:0033632	regulation of cell-cell adhesion mediated by integrin	12/494	17/12875	4.64127829327581e-14	1.5220906402859e-12	1.32607951236452e-12	A. integerrimus|evm.model.ctg028260_np12.18/A. integerrimus|evm.model.ctg023050_np12.152/A. integerrimus|evm.model.ctg021490_np12.5/A. integerrimus|evm.model.ctg011250_np12.10/A. integerrimus|evm.model.ctg009700_np12.70/A. integerrimus|evm.model.ctg019130_np12.40/A. integerrimus|evm.model.ctg017880_np12.76/A. integerrimus|evm.model.ctg019910_np12.15/A. integerrimus|evm.model.ctg021870_np12.37/A. …	12
GO:0046061	GO:0046061	dATP catabolic process	12/494	17/12875	4.64127829327581e-14	1.5220906402859e-12	1.32607951236452e-12	A. integerrimus|evm.model.ctg028260_np12.18/A. integerrimus|evm.model.ctg023050_np12.152/A. integerrimus|evm.model.ctg021490_np12.5/A. integerrimus|evm.model.ctg011250_np12.10/A. integerrimus|evm.model.ctg009700_np12.70/A. integerrimus|evm.model.ctg019130_np12.40/A. integerrimus|evm.model.ctg017880_np12.76/A. integerrimus|evm.model.ctg019910_np12.15/A. integerrimus|evm.model.ctg021870_np12.37/A. …	12
GO:0046101	GO:0046101	hypoxanthine biosynthetic process	12/494	17/12875	4.64127829327581e-14	1.5220906402859e-12	1.32607951236452e-12	A. integerrimus|evm.model.ctg028260_np12.18/A. integerrimus|evm.model.ctg023050_np12.152/A. integerrimus|evm.model.ctg021490_np12.5/A. integerrimus|evm.model.ctg011250_np12.10/A. integerrimus|evm.model.ctg009700_np12.70/A. integerrimus|evm.model.ctg019130_np12.40/A. integerrimus|evm.model.ctg017880_np12.76/A. integerrimus|evm.model.ctg019910_np12.15/A. integerrimus|evm.model.ctg021870_np12.37/A. …	12
GO:0046103	GO:0046103	inosine biosynthetic process	12/494	17/12875	4.64127829327581e-14	1.5220906402859e-12	1.32607951236452e-12	A. integerrimus|evm.model.ctg028260_np12.18/A. integerrimus|evm.model.ctg023050_np12.152/A. integerrimus|evm.model.ctg021490_np12.5/A. integerrimus|evm.model.ctg011250_np12.10/A. integerrimus|evm.model.ctg009700_np12.70/A. integerrimus|evm.model.ctg019130_np12.40/A. integerrimus|evm.model.ctg017880_np12.76/A. integerrimus|evm.model.ctg019910_np12.15/A. integerrimus|evm.model.ctg021870_np12.37/A. …	12
GO:0055083	GO:0055083	GO:0055083	14/494	26/12875	7.91111881751024e-14	2.57146366519603e-12	2.24031683327724e-12	A. integerrimus|evm.model.ctg015520_np12.6/A. integerrimus|evm.model.ctg029050_np12.204/A. integerrimus|evm.model.ctg018280_np12.28/A. integerrimus|evm.model.ctg029050_np12.193/A. integerrimus|evm.model.ctg019620_np12.254/A. integerrimus|evm.model.ctg019620_np12.252/A. integerrimus|evm.model.ctg019620_np12.263/A. integerrimus|evm.model.ctg017440_np12.6/A. integerrimus|evm.model.ctg015860_np12.1/A…	14
GO:0043492	GO:0043492	GO:0043492	30/494	152/12875	8.99597653513e-14	2.89844050995899e-12	2.52518639582596e-12	A. integerrimus|evm.model.ctg020090_np12.120/A. integerrimus|evm.model.ctg016730_np12.22/A. integerrimus|evm.model.ctg015520_np12.6/A. integerrimus|evm.model.ctg029050_np12.204/A. integerrimus|evm.model.ctg018280_np12.28/A. integerrimus|evm.model.ctg029050_np12.193/A. integerrimus|evm.model.ctg019620_np12.254/A. integerrimus|evm.model.ctg019620_np12.252/A. integerrimus|evm.model.ctg019620_np12.26…	30
GO:0004000	GO:0004000	adenosine deaminase activity	12/494	18/12875	1.34425633062956e-13	4.11454458533531e-12	3.58468354834549e-12	A. integerrimus|evm.model.ctg028260_np12.18/A. integerrimus|evm.model.ctg023050_np12.152/A. integerrimus|evm.model.ctg021490_np12.5/A. integerrimus|evm.model.ctg011250_np12.10/A. integerrimus|evm.model.ctg009700_np12.70/A. integerrimus|evm.model.ctg019130_np12.40/A. integerrimus|evm.model.ctg017880_np12.76/A. integerrimus|evm.model.ctg019910_np12.15/A. integerrimus|evm.model.ctg021870_np12.37/A. …	12
GO:0032261	GO:0032261	purine nucleotide salvage	12/494	18/12875	1.34425633062956e-13	4.11454458533531e-12	3.58468354834549e-12	A. integerrimus|evm.model.ctg028260_np12.18/A. integerrimus|evm.model.ctg023050_np12.152/A. integerrimus|evm.model.ctg021490_np12.5/A. integerrimus|evm.model.ctg011250_np12.10/A. integerrimus|evm.model.ctg009700_np12.70/A. integerrimus|evm.model.ctg019130_np12.40/A. integerrimus|evm.model.ctg017880_np12.76/A. integerrimus|evm.model.ctg019910_np12.15/A. integerrimus|evm.model.ctg021870_np12.37/A. …	12
GO:0045188	GO:0045188	regulation of circadian sleep/wake cycle, non-REM sleep	12/494	18/12875	1.34425633062956e-13	4.11454458533531e-12	3.58468354834549e-12	A. integerrimus|evm.model.ctg028260_np12.18/A. integerrimus|evm.model.ctg023050_np12.152/A. integerrimus|evm.model.ctg021490_np12.5/A. integerrimus|evm.model.ctg011250_np12.10/A. integerrimus|evm.model.ctg009700_np12.70/A. integerrimus|evm.model.ctg019130_np12.40/A. integerrimus|evm.model.ctg017880_np12.76/A. integerrimus|evm.model.ctg019910_np12.15/A. integerrimus|evm.model.ctg021870_np12.37/A. …	12
GO:0046102	GO:0046102	inosine metabolic process	12/494	18/12875	1.34425633062956e-13	4.11454458533531e-12	3.58468354834549e-12	A. integerrimus|evm.model.ctg028260_np12.18/A. integerrimus|evm.model.ctg023050_np12.152/A. integerrimus|evm.model.ctg021490_np12.5/A. integerrimus|evm.model.ctg011250_np12.10/A. integerrimus|evm.model.ctg009700_np12.70/A. integerrimus|evm.model.ctg019130_np12.40/A. integerrimus|evm.model.ctg017880_np12.76/A. integerrimus|evm.model.ctg019910_np12.15/A. integerrimus|evm.model.ctg021870_np12.37/A. …	12
GO:0046121	GO:0046121	deoxyribonucleoside catabolic process	12/494	18/12875	1.34425633062956e-13	4.11454458533531e-12	3.58468354834549e-12	A. integerrimus|evm.model.ctg028260_np12.18/A. integerrimus|evm.model.ctg023050_np12.152/A. integerrimus|evm.model.ctg021490_np12.5/A. integerrimus|evm.model.ctg011250_np12.10/A. integerrimus|evm.model.ctg009700_np12.70/A. integerrimus|evm.model.ctg019130_np12.40/A. integerrimus|evm.model.ctg017880_np12.76/A. integerrimus|evm.model.ctg019910_np12.15/A. integerrimus|evm.model.ctg021870_np12.37/A. …	12
GO:0070244	GO:0070244	negative regulation of thymocyte apoptotic process	12/494	18/12875	1.34425633062956e-13	4.11454458533531e-12	3.58468354834549e-12	A. integerrimus|evm.model.ctg028260_np12.18/A. integerrimus|evm.model.ctg023050_np12.152/A. integerrimus|evm.model.ctg021490_np12.5/A. integerrimus|evm.model.ctg011250_np12.10/A. integerrimus|evm.model.ctg009700_np12.70/A. integerrimus|evm.model.ctg019130_np12.40/A. integerrimus|evm.model.ctg017880_np12.76/A. integerrimus|evm.model.ctg019910_np12.15/A. integerrimus|evm.model.ctg021870_np12.37/A. …	12
GO:0046717	GO:0046717	acid secretion	20/494	65/12875	1.8650075016319e-13	5.66129963098675e-12	4.93225124398519e-12	A. integerrimus|evm.model.ctg024490_np12.3/A. integerrimus|evm.model.ctg015520_np12.6/A. integerrimus|evm.model.ctg029050_np12.204/A. integerrimus|evm.model.ctg018280_np12.28/A. integerrimus|evm.model.ctg029050_np12.193/A. integerrimus|evm.model.ctg019620_np12.254/A. integerrimus|evm.model.ctg019620_np12.252/A. integerrimus|evm.model.ctg019620_np12.263/A. integerrimus|evm.model.ctg017440_np12.6/A…	20
GO:0070741	GO:0070741	response to interleukin-6	14/494	28/12875	3.06145993796706e-13	9.21700192799429e-12	8.0300588536841e-12	A. integerrimus|evm.model.ctg015520_np12.6/A. integerrimus|evm.model.ctg029050_np12.204/A. integerrimus|evm.model.ctg018280_np12.28/A. integerrimus|evm.model.ctg029050_np12.193/A. integerrimus|evm.model.ctg019620_np12.254/A. integerrimus|evm.model.ctg019620_np12.252/A. integerrimus|evm.model.ctg019620_np12.263/A. integerrimus|evm.model.ctg017440_np12.6/A. integerrimus|evm.model.ctg015860_np12.1/A…	14
GO:0005416	GO:0005416	amino acid:monoatomic cation symporter activity	12/494	19/12875	3.52259857515469e-13	1.04342778762445e-11	9.09057696814115e-12	A. integerrimus|evm.model.ctg021930_np12.128/A. integerrimus|evm.model.ctg018440_np12.504/A. integerrimus|evm.model.ctg030550_np12.192/A. integerrimus|evm.model.ctg005780_np12.111/A. integerrimus|evm.model.ctg013130_np12.25/A. integerrimus|evm.model.ctg012130_np12.70/A. integerrimus|evm.model.ctg024520_np12.507/A. integerrimus|evm.model.ctg003800_np12.6/A. integerrimus|evm.model.ctg007680_np12.65…	12
GO:0060405	GO:0060405	regulation of penile erection	12/494	19/12875	3.52259857515469e-13	1.04342778762445e-11	9.09057696814115e-12	A. integerrimus|evm.model.ctg028260_np12.18/A. integerrimus|evm.model.ctg023050_np12.152/A. integerrimus|evm.model.ctg021490_np12.5/A. integerrimus|evm.model.ctg011250_np12.10/A. integerrimus|evm.model.ctg009700_np12.70/A. integerrimus|evm.model.ctg019130_np12.40/A. integerrimus|evm.model.ctg017880_np12.76/A. integerrimus|evm.model.ctg019910_np12.15/A. integerrimus|evm.model.ctg021870_np12.37/A. …	12
GO:0051608	GO:0051608	histamine transport	14/494	29/12875	5.71291474801995e-13	1.67868286955818e-11	1.46250617549311e-11	A. integerrimus|evm.model.ctg023400_np12.16/A. integerrimus|evm.model.ctg006080_np12.22/A. integerrimus|evm.model.ctg028260_np12.18/A. integerrimus|evm.model.ctg023050_np12.152/A. integerrimus|evm.model.ctg021490_np12.5/A. integerrimus|evm.model.ctg011250_np12.10/A. integerrimus|evm.model.ctg009700_np12.70/A. integerrimus|evm.model.ctg019130_np12.40/A. integerrimus|evm.model.ctg017880_np12.76/A. …	14
GO:0002903	GO:0002903	negative regulation of B cell apoptotic process	12/494	20/12875	8.50219304214796e-13	2.38385916364958e-11	2.07687158281477e-11	A. integerrimus|evm.model.ctg028260_np12.18/A. integerrimus|evm.model.ctg023050_np12.152/A. integerrimus|evm.model.ctg021490_np12.5/A. integerrimus|evm.model.ctg011250_np12.10/A. integerrimus|evm.model.ctg009700_np12.70/A. integerrimus|evm.model.ctg019130_np12.40/A. integerrimus|evm.model.ctg017880_np12.76/A. integerrimus|evm.model.ctg019910_np12.15/A. integerrimus|evm.model.ctg021870_np12.37/A. …	12
GO:0009217	GO:0009217	purine deoxyribonucleoside triphosphate catabolic process	12/494	20/12875	8.50219304214796e-13	2.38385916364958e-11	2.07687158281477e-11	A. integerrimus|evm.model.ctg028260_np12.18/A. integerrimus|evm.model.ctg023050_np12.152/A. integerrimus|evm.model.ctg021490_np12.5/A. integerrimus|evm.model.ctg011250_np12.10/A. integerrimus|evm.model.ctg009700_np12.70/A. integerrimus|evm.model.ctg019130_np12.40/A. integerrimus|evm.model.ctg017880_np12.76/A. integerrimus|evm.model.ctg019910_np12.15/A. integerrimus|evm.model.ctg021870_np12.37/A. …	12
GO:0046085	GO:0046085	adenosine metabolic process	12/494	20/12875	8.50219304214796e-13	2.38385916364958e-11	2.07687158281477e-11	A. integerrimus|evm.model.ctg028260_np12.18/A. integerrimus|evm.model.ctg023050_np12.152/A. integerrimus|evm.model.ctg021490_np12.5/A. integerrimus|evm.model.ctg011250_np12.10/A. integerrimus|evm.model.ctg009700_np12.70/A. integerrimus|evm.model.ctg019130_np12.40/A. integerrimus|evm.model.ctg017880_np12.76/A. integerrimus|evm.model.ctg019910_np12.15/A. integerrimus|evm.model.ctg021870_np12.37/A. …	12
GO:0048537	GO:0048537	mucosa-associated lymphoid tissue development	12/494	20/12875	8.50219304214796e-13	2.38385916364958e-11	2.07687158281477e-11	A. integerrimus|evm.model.ctg028260_np12.18/A. integerrimus|evm.model.ctg023050_np12.152/A. integerrimus|evm.model.ctg021490_np12.5/A. integerrimus|evm.model.ctg011250_np12.10/A. integerrimus|evm.model.ctg009700_np12.70/A. integerrimus|evm.model.ctg019130_np12.40/A. integerrimus|evm.model.ctg017880_np12.76/A. integerrimus|evm.model.ctg019910_np12.15/A. integerrimus|evm.model.ctg021870_np12.37/A. …	12
GO:0048541	GO:0048541	Peyer's patch development	12/494	20/12875	8.50219304214796e-13	2.38385916364958e-11	2.07687158281477e-11	A. integerrimus|evm.model.ctg028260_np12.18/A. integerrimus|evm.model.ctg023050_np12.152/A. integerrimus|evm.model.ctg021490_np12.5/A. integerrimus|evm.model.ctg011250_np12.10/A. integerrimus|evm.model.ctg009700_np12.70/A. integerrimus|evm.model.ctg019130_np12.40/A. integerrimus|evm.model.ctg017880_np12.76/A. integerrimus|evm.model.ctg019910_np12.15/A. integerrimus|evm.model.ctg021870_np12.37/A. …	12
GO:0070255	GO:0070255	regulation of mucus secretion	12/494	20/12875	8.50219304214796e-13	2.38385916364958e-11	2.07687158281477e-11	A. integerrimus|evm.model.ctg028260_np12.18/A. integerrimus|evm.model.ctg023050_np12.152/A. integerrimus|evm.model.ctg021490_np12.5/A. integerrimus|evm.model.ctg011250_np12.10/A. integerrimus|evm.model.ctg009700_np12.70/A. integerrimus|evm.model.ctg019130_np12.40/A. integerrimus|evm.model.ctg017880_np12.76/A. integerrimus|evm.model.ctg019910_np12.15/A. integerrimus|evm.model.ctg021870_np12.37/A. …	12
GO:0002634	GO:0002634	regulation of germinal center formation	12/494	21/12875	1.91530461196549e-12	5.1727307645215e-11	4.50659908697762e-11	A. integerrimus|evm.model.ctg028260_np12.18/A. integerrimus|evm.model.ctg023050_np12.152/A. integerrimus|evm.model.ctg021490_np12.5/A. integerrimus|evm.model.ctg011250_np12.10/A. integerrimus|evm.model.ctg009700_np12.70/A. integerrimus|evm.model.ctg019130_np12.40/A. integerrimus|evm.model.ctg017880_np12.76/A. integerrimus|evm.model.ctg019910_np12.15/A. integerrimus|evm.model.ctg021870_np12.37/A. …	12
GO:0009146	GO:0009146	purine nucleoside triphosphate catabolic process	12/494	21/12875	1.91530461196549e-12	5.1727307645215e-11	4.50659908697762e-11	A. integerrimus|evm.model.ctg028260_np12.18/A. integerrimus|evm.model.ctg023050_np12.152/A. integerrimus|evm.model.ctg021490_np12.5/A. integerrimus|evm.model.ctg011250_np12.10/A. integerrimus|evm.model.ctg009700_np12.70/A. integerrimus|evm.model.ctg019130_np12.40/A. integerrimus|evm.model.ctg017880_np12.76/A. integerrimus|evm.model.ctg019910_np12.15/A. integerrimus|evm.model.ctg021870_np12.37/A. …	12
GO:0009155	GO:0009155	purine deoxyribonucleotide catabolic process	12/494	21/12875	1.91530461196549e-12	5.1727307645215e-11	4.50659908697762e-11	A. integerrimus|evm.model.ctg028260_np12.18/A. integerrimus|evm.model.ctg023050_np12.152/A. integerrimus|evm.model.ctg021490_np12.5/A. integerrimus|evm.model.ctg011250_np12.10/A. integerrimus|evm.model.ctg009700_np12.70/A. integerrimus|evm.model.ctg019130_np12.40/A. integerrimus|evm.model.ctg017880_np12.76/A. integerrimus|evm.model.ctg019910_np12.15/A. integerrimus|evm.model.ctg021870_np12.37/A. …	12
GO:0009204	GO:0009204	deoxyribonucleoside triphosphate catabolic process	12/494	21/12875	1.91530461196549e-12	5.1727307645215e-11	4.50659908697762e-11	A. integerrimus|evm.model.ctg028260_np12.18/A. integerrimus|evm.model.ctg023050_np12.152/A. integerrimus|evm.model.ctg021490_np12.5/A. integerrimus|evm.model.ctg011250_np12.10/A. integerrimus|evm.model.ctg009700_np12.70/A. integerrimus|evm.model.ctg019130_np12.40/A. integerrimus|evm.model.ctg017880_np12.76/A. integerrimus|evm.model.ctg019910_np12.15/A. integerrimus|evm.model.ctg021870_np12.37/A. …	12
GO:0050862	GO:0050862	positive regulation of T cell receptor signaling pathway	12/494	21/12875	1.91530461196549e-12	5.1727307645215e-11	4.50659908697762e-11	A. integerrimus|evm.model.ctg028260_np12.18/A. integerrimus|evm.model.ctg023050_np12.152/A. integerrimus|evm.model.ctg021490_np12.5/A. integerrimus|evm.model.ctg011250_np12.10/A. integerrimus|evm.model.ctg009700_np12.70/A. integerrimus|evm.model.ctg019130_np12.40/A. integerrimus|evm.model.ctg017880_np12.76/A. integerrimus|evm.model.ctg019910_np12.15/A. integerrimus|evm.model.ctg021870_np12.37/A. …	12
GO:0043090	GO:0043090	amino acid import	16/494	44/12875	2.68058203400074e-12	7.18669913203264e-11	6.26121351007472e-11	A. integerrimus|evm.model.ctg024520_np12.507/A. integerrimus|evm.model.ctg015380_np12.3/A. integerrimus|evm.model.ctg022290_np12.55/A. integerrimus|evm.model.ctg028100_np12.31/A. integerrimus|evm.model.ctg020310_np12.29/A. integerrimus|evm.model.ctg016780_np12.92/A. integerrimus|evm.model.ctg024200_np12.230/A. integerrimus|evm.model.ctg016780_np12.66/A. integerrimus|evm.model.ctg001280_np12.17/A.…	16
GO:0046100	GO:0046100	hypoxanthine metabolic process	12/494	22/12875	4.06811264041825e-12	1.07497681498246e-10	9.36543917218589e-11	A. integerrimus|evm.model.ctg028260_np12.18/A. integerrimus|evm.model.ctg023050_np12.152/A. integerrimus|evm.model.ctg021490_np12.5/A. integerrimus|evm.model.ctg011250_np12.10/A. integerrimus|evm.model.ctg009700_np12.70/A. integerrimus|evm.model.ctg019130_np12.40/A. integerrimus|evm.model.ctg017880_np12.76/A. integerrimus|evm.model.ctg019910_np12.15/A. integerrimus|evm.model.ctg021870_np12.37/A. …	12
GO:0070233	GO:0070233	negative regulation of T cell apoptotic process	12/494	22/12875	4.06811264041825e-12	1.07497681498246e-10	9.36543917218589e-11	A. integerrimus|evm.model.ctg028260_np12.18/A. integerrimus|evm.model.ctg023050_np12.152/A. integerrimus|evm.model.ctg021490_np12.5/A. integerrimus|evm.model.ctg011250_np12.10/A. integerrimus|evm.model.ctg009700_np12.70/A. integerrimus|evm.model.ctg019130_np12.40/A. integerrimus|evm.model.ctg017880_np12.76/A. integerrimus|evm.model.ctg019910_np12.15/A. integerrimus|evm.model.ctg021870_np12.37/A. …	12
GO:0089718	GO:0089718	amino acid import across plasma membrane	15/494	40/12875	7.74371202098941e-12	2.01090968889608e-10	1.75194963366934e-10	A. integerrimus|evm.model.ctg015380_np12.3/A. integerrimus|evm.model.ctg022290_np12.55/A. integerrimus|evm.model.ctg028100_np12.31/A. integerrimus|evm.model.ctg020310_np12.29/A. integerrimus|evm.model.ctg016780_np12.92/A. integerrimus|evm.model.ctg024200_np12.230/A. integerrimus|evm.model.ctg016780_np12.66/A. integerrimus|evm.model.ctg001280_np12.17/A. integerrimus|evm.model.ctg020460_np12.86/A. …	15
GO:0015696	GO:0015696	GO:0015696	20/494	78/12875	8.19105177337332e-12	2.01090968889608e-10	1.75194963366934e-10	A. integerrimus|evm.model.ctg011570_np12.114/A. integerrimus|evm.model.ctg012130_np12.70/A. integerrimus|evm.model.ctg014310_np12.80/A. integerrimus|evm.model.ctg009980_np12.186/A. integerrimus|evm.model.ctg023400_np12.16/A. integerrimus|evm.model.ctg016130_np12.42/A. integerrimus|evm.model.ctg024490_np12.3/A. integerrimus|evm.model.ctg006080_np12.22/A. integerrimus|evm.model.ctg028260_np12.18/A.…	20
GO:0002313	GO:0002313	mature B cell differentiation involved in immune response	12/494	23/12875	8.21226390782501e-12	2.01090968889608e-10	1.75194963366934e-10	A. integerrimus|evm.model.ctg028260_np12.18/A. integerrimus|evm.model.ctg023050_np12.152/A. integerrimus|evm.model.ctg021490_np12.5/A. integerrimus|evm.model.ctg011250_np12.10/A. integerrimus|evm.model.ctg009700_np12.70/A. integerrimus|evm.model.ctg019130_np12.40/A. integerrimus|evm.model.ctg017880_np12.76/A. integerrimus|evm.model.ctg019910_np12.15/A. integerrimus|evm.model.ctg021870_np12.37/A. …	12
GO:0002335	GO:0002335	mature B cell differentiation	12/494	23/12875	8.21226390782501e-12	2.01090968889608e-10	1.75194963366934e-10	A. integerrimus|evm.model.ctg028260_np12.18/A. integerrimus|evm.model.ctg023050_np12.152/A. integerrimus|evm.model.ctg021490_np12.5/A. integerrimus|evm.model.ctg011250_np12.10/A. integerrimus|evm.model.ctg009700_np12.70/A. integerrimus|evm.model.ctg019130_np12.40/A. integerrimus|evm.model.ctg017880_np12.76/A. integerrimus|evm.model.ctg019910_np12.15/A. integerrimus|evm.model.ctg021870_np12.37/A. …	12
GO:0002902	GO:0002902	regulation of B cell apoptotic process	12/494	23/12875	8.21226390782501e-12	2.01090968889608e-10	1.75194963366934e-10	A. integerrimus|evm.model.ctg028260_np12.18/A. integerrimus|evm.model.ctg023050_np12.152/A. integerrimus|evm.model.ctg021490_np12.5/A. integerrimus|evm.model.ctg011250_np12.10/A. integerrimus|evm.model.ctg009700_np12.70/A. integerrimus|evm.model.ctg019130_np12.40/A. integerrimus|evm.model.ctg017880_np12.76/A. integerrimus|evm.model.ctg019910_np12.15/A. integerrimus|evm.model.ctg021870_np12.37/A. …	12
GO:0009120	GO:0009120	deoxyribonucleoside metabolic process	12/494	23/12875	8.21226390782501e-12	2.01090968889608e-10	1.75194963366934e-10	A. integerrimus|evm.model.ctg028260_np12.18/A. integerrimus|evm.model.ctg023050_np12.152/A. integerrimus|evm.model.ctg021490_np12.5/A. integerrimus|evm.model.ctg011250_np12.10/A. integerrimus|evm.model.ctg009700_np12.70/A. integerrimus|evm.model.ctg019130_np12.40/A. integerrimus|evm.model.ctg017880_np12.76/A. integerrimus|evm.model.ctg019910_np12.15/A. integerrimus|evm.model.ctg021870_np12.37/A. …	12
GO:0019239	GO:0019239	deaminase activity	12/494	23/12875	8.21226390782501e-12	2.01090968889608e-10	1.75194963366934e-10	A. integerrimus|evm.model.ctg028260_np12.18/A. integerrimus|evm.model.ctg023050_np12.152/A. integerrimus|evm.model.ctg021490_np12.5/A. integerrimus|evm.model.ctg011250_np12.10/A. integerrimus|evm.model.ctg009700_np12.70/A. integerrimus|evm.model.ctg019130_np12.40/A. integerrimus|evm.model.ctg017880_np12.76/A. integerrimus|evm.model.ctg019910_np12.15/A. integerrimus|evm.model.ctg021870_np12.37/A. …	12
GO:0043101	GO:0043101	purine-containing compound salvage	12/494	23/12875	8.21226390782501e-12	2.01090968889608e-10	1.75194963366934e-10	A. integerrimus|evm.model.ctg028260_np12.18/A. integerrimus|evm.model.ctg023050_np12.152/A. integerrimus|evm.model.ctg021490_np12.5/A. integerrimus|evm.model.ctg011250_np12.10/A. integerrimus|evm.model.ctg009700_np12.70/A. integerrimus|evm.model.ctg019130_np12.40/A. integerrimus|evm.model.ctg017880_np12.76/A. integerrimus|evm.model.ctg019910_np12.15/A. integerrimus|evm.model.ctg021870_np12.37/A. …	12
GO:0046060	GO:0046060	dATP metabolic process	12/494	23/12875	8.21226390782501e-12	2.01090968889608e-10	1.75194963366934e-10	A. integerrimus|evm.model.ctg028260_np12.18/A. integerrimus|evm.model.ctg023050_np12.152/A. integerrimus|evm.model.ctg021490_np12.5/A. integerrimus|evm.model.ctg011250_np12.10/A. integerrimus|evm.model.ctg009700_np12.70/A. integerrimus|evm.model.ctg019130_np12.40/A. integerrimus|evm.model.ctg017880_np12.76/A. integerrimus|evm.model.ctg019910_np12.15/A. integerrimus|evm.model.ctg021870_np12.37/A. …	12
GO:0050857	GO:0050857	positive regulation of antigen receptor-mediated signaling pathway	12/494	23/12875	8.21226390782501e-12	2.01090968889608e-10	1.75194963366934e-10	A. integerrimus|evm.model.ctg028260_np12.18/A. integerrimus|evm.model.ctg023050_np12.152/A. integerrimus|evm.model.ctg021490_np12.5/A. integerrimus|evm.model.ctg011250_np12.10/A. integerrimus|evm.model.ctg009700_np12.70/A. integerrimus|evm.model.ctg019130_np12.40/A. integerrimus|evm.model.ctg017880_np12.76/A. integerrimus|evm.model.ctg019910_np12.15/A. integerrimus|evm.model.ctg021870_np12.37/A. …	12
GO:0070243	GO:0070243	regulation of thymocyte apoptotic process	12/494	23/12875	8.21226390782501e-12	2.01090968889608e-10	1.75194963366934e-10	A. integerrimus|evm.model.ctg028260_np12.18/A. integerrimus|evm.model.ctg023050_np12.152/A. integerrimus|evm.model.ctg021490_np12.5/A. integerrimus|evm.model.ctg011250_np12.10/A. integerrimus|evm.model.ctg009700_np12.70/A. integerrimus|evm.model.ctg019130_np12.40/A. integerrimus|evm.model.ctg017880_np12.76/A. integerrimus|evm.model.ctg019910_np12.15/A. integerrimus|evm.model.ctg021870_np12.37/A. …	12
GO:0035641	GO:0035641	locomotory exploration behavior	14/494	35/12875	1.38189364686164e-11	3.36138765888926e-10	2.92851633772002e-10	A. integerrimus|evm.model.ctg017800_np12.410/A. integerrimus|evm.model.ctg013790_np12.35/A. integerrimus|evm.model.ctg015510_np12.13/A. integerrimus|evm.model.ctg028310_np12.28/A. integerrimus|evm.model.ctg028310_np12.100/A. integerrimus|evm.model.ctg017800_np12.240/A. integerrimus|evm.model.ctg017800_np12.116/A. integerrimus|evm.model.ctg020980_np12.19/A. integerrimus|evm.model.ctg006290_np12.1/…	14
GO:0033089	GO:0033089	positive regulation of T cell differentiation in thymus	12/494	24/12875	1.58573287297068e-11	3.80679532184399e-10	3.31656548595175e-10	A. integerrimus|evm.model.ctg028260_np12.18/A. integerrimus|evm.model.ctg023050_np12.152/A. integerrimus|evm.model.ctg021490_np12.5/A. integerrimus|evm.model.ctg011250_np12.10/A. integerrimus|evm.model.ctg009700_np12.70/A. integerrimus|evm.model.ctg019130_np12.40/A. integerrimus|evm.model.ctg017880_np12.76/A. integerrimus|evm.model.ctg019910_np12.15/A. integerrimus|evm.model.ctg021870_np12.37/A. …	12
GO:0043173	GO:0043173	nucleotide salvage	12/494	24/12875	1.58573287297068e-11	3.80679532184399e-10	3.31656548595175e-10	A. integerrimus|evm.model.ctg028260_np12.18/A. integerrimus|evm.model.ctg023050_np12.152/A. integerrimus|evm.model.ctg021490_np12.5/A. integerrimus|evm.model.ctg011250_np12.10/A. integerrimus|evm.model.ctg009700_np12.70/A. integerrimus|evm.model.ctg019130_np12.40/A. integerrimus|evm.model.ctg017880_np12.76/A. integerrimus|evm.model.ctg019910_np12.15/A. integerrimus|evm.model.ctg021870_np12.37/A. …	12
GO:0005283	GO:0005283	amino acid:sodium symporter activity	10/494	15/12875	1.59779545811956e-11	3.81084592056697e-10	3.32009445843025e-10	A. integerrimus|evm.model.ctg021930_np12.128/A. integerrimus|evm.model.ctg018440_np12.504/A. integerrimus|evm.model.ctg030550_np12.192/A. integerrimus|evm.model.ctg005780_np12.111/A. integerrimus|evm.model.ctg012130_np12.70/A. integerrimus|evm.model.ctg024520_np12.507/A. integerrimus|evm.model.ctg003800_np12.6/A. integerrimus|evm.model.ctg007680_np12.65/A. integerrimus|evm.model.ctg007680_np12.76…	10
GO:0030890	GO:0030890	positive regulation of B cell proliferation	13/494	30/12875	2.20206488871723e-11	5.21818344274736e-10	4.54619847993236e-10	A. integerrimus|evm.model.ctg020090_np12.120/A. integerrimus|evm.model.ctg028260_np12.18/A. integerrimus|evm.model.ctg023050_np12.152/A. integerrimus|evm.model.ctg021490_np12.5/A. integerrimus|evm.model.ctg011250_np12.10/A. integerrimus|evm.model.ctg009700_np12.70/A. integerrimus|evm.model.ctg019130_np12.40/A. integerrimus|evm.model.ctg017880_np12.76/A. integerrimus|evm.model.ctg019910_np12.15/A.…	13
GO:0009113	GO:0009113	purine nucleobase biosynthetic process	12/494	25/12875	2.94419247369886e-11	6.88791016299104e-10	6.00090185722061e-10	A. integerrimus|evm.model.ctg028260_np12.18/A. integerrimus|evm.model.ctg023050_np12.152/A. integerrimus|evm.model.ctg021490_np12.5/A. integerrimus|evm.model.ctg011250_np12.10/A. integerrimus|evm.model.ctg009700_np12.70/A. integerrimus|evm.model.ctg019130_np12.40/A. integerrimus|evm.model.ctg017880_np12.76/A. integerrimus|evm.model.ctg019910_np12.15/A. integerrimus|evm.model.ctg021870_np12.37/A. …	12
GO:0046110	GO:0046110	xanthine metabolic process	12/494	25/12875	2.94419247369886e-11	6.88791016299104e-10	6.00090185722061e-10	A. integerrimus|evm.model.ctg028260_np12.18/A. integerrimus|evm.model.ctg023050_np12.152/A. integerrimus|evm.model.ctg021490_np12.5/A. integerrimus|evm.model.ctg011250_np12.10/A. integerrimus|evm.model.ctg009700_np12.70/A. integerrimus|evm.model.ctg019130_np12.40/A. integerrimus|evm.model.ctg017880_np12.76/A. integerrimus|evm.model.ctg019910_np12.15/A. integerrimus|evm.model.ctg021870_np12.37/A. …	12
GO:0005310	GO:0005310	dicarboxylic acid transmembrane transporter activity	14/494	37/12875	3.3891976247229e-11	7.87881194658685e-10	6.86419772095778e-10	A. integerrimus|evm.model.ctg015520_np12.6/A. integerrimus|evm.model.ctg029050_np12.204/A. integerrimus|evm.model.ctg018280_np12.28/A. integerrimus|evm.model.ctg029050_np12.193/A. integerrimus|evm.model.ctg019620_np12.254/A. integerrimus|evm.model.ctg019620_np12.252/A. integerrimus|evm.model.ctg019620_np12.263/A. integerrimus|evm.model.ctg017440_np12.6/A. integerrimus|evm.model.ctg015860_np12.1/A…	14
GO:0015238	GO:0015238	GO:0015238	26/494	144/12875	3.46650069591092e-11	8.00783462646592e-10	6.97660517416034e-10	A. integerrimus|evm.model.ctg011570_np12.114/A. integerrimus|evm.model.ctg012130_np12.70/A. integerrimus|evm.model.ctg014310_np12.80/A. integerrimus|evm.model.ctg015380_np12.3/A. integerrimus|evm.model.ctg022290_np12.55/A. integerrimus|evm.model.ctg028100_np12.31/A. integerrimus|evm.model.ctg020310_np12.29/A. integerrimus|evm.model.ctg016780_np12.92/A. integerrimus|evm.model.ctg024200_np12.230/A.…	26
GO:0097254	GO:0097254	renal tubular secretion	16/494	51/12875	3.59853105418634e-11	8.26087785126653e-10	7.19706210837269e-10	A. integerrimus|evm.model.ctg016130_np12.42/A. integerrimus|evm.model.ctg015520_np12.6/A. integerrimus|evm.model.ctg029050_np12.204/A. integerrimus|evm.model.ctg018280_np12.28/A. integerrimus|evm.model.ctg029050_np12.193/A. integerrimus|evm.model.ctg019620_np12.254/A. integerrimus|evm.model.ctg019620_np12.252/A. integerrimus|evm.model.ctg019620_np12.263/A. integerrimus|evm.model.ctg017440_np12.6/…	16
GO:0050850	GO:0050850	positive regulation of calcium-mediated signaling	17/494	59/12875	4.0241004194042e-11	9.18044772700102e-10	7.99821201372264e-10	A. integerrimus|evm.model.ctg015580_np12.15/A. integerrimus|evm.model.ctg015580_np12.52/A. integerrimus|evm.model.ctg007670_np12.238/A. integerrimus|evm.model.ctg007670_np12.379/A. integerrimus|evm.model.ctg007670_np12.242/A. integerrimus|evm.model.ctg028260_np12.18/A. integerrimus|evm.model.ctg023050_np12.152/A. integerrimus|evm.model.ctg021490_np12.5/A. integerrimus|evm.model.ctg011250_np12.10/…	17
GO:0016814	GO:0016814	hydrolase activity, acting on carbon-nitrogen (but not peptide) bonds, in cyclic amidines	12/494	26/12875	5.27902131497264e-11	1.18956106072972e-09	1.03637228269402e-09	A. integerrimus|evm.model.ctg028260_np12.18/A. integerrimus|evm.model.ctg023050_np12.152/A. integerrimus|evm.model.ctg021490_np12.5/A. integerrimus|evm.model.ctg011250_np12.10/A. integerrimus|evm.model.ctg009700_np12.70/A. integerrimus|evm.model.ctg019130_np12.40/A. integerrimus|evm.model.ctg017880_np12.76/A. integerrimus|evm.model.ctg019910_np12.15/A. integerrimus|evm.model.ctg021870_np12.37/A. …	12
GO:0046130	GO:0046130	purine ribonucleoside catabolic process	12/494	26/12875	5.27902131497264e-11	1.18956106072972e-09	1.03637228269402e-09	A. integerrimus|evm.model.ctg028260_np12.18/A. integerrimus|evm.model.ctg023050_np12.152/A. integerrimus|evm.model.ctg021490_np12.5/A. integerrimus|evm.model.ctg011250_np12.10/A. integerrimus|evm.model.ctg009700_np12.70/A. integerrimus|evm.model.ctg019130_np12.40/A. integerrimus|evm.model.ctg017880_np12.76/A. integerrimus|evm.model.ctg019910_np12.15/A. integerrimus|evm.model.ctg021870_np12.37/A. …	12
GO:0006152	GO:0006152	purine nucleoside catabolic process	12/494	27/12875	9.17424291603556e-11	2.04224207458173e-09	1.77924711098871e-09	A. integerrimus|evm.model.ctg028260_np12.18/A. integerrimus|evm.model.ctg023050_np12.152/A. integerrimus|evm.model.ctg021490_np12.5/A. integerrimus|evm.model.ctg011250_np12.10/A. integerrimus|evm.model.ctg009700_np12.70/A. integerrimus|evm.model.ctg019130_np12.40/A. integerrimus|evm.model.ctg017880_np12.76/A. integerrimus|evm.model.ctg019910_np12.15/A. integerrimus|evm.model.ctg021870_np12.37/A. …	12
GO:0009215	GO:0009215	purine deoxyribonucleoside triphosphate metabolic process	12/494	27/12875	9.17424291603556e-11	2.04224207458173e-09	1.77924711098871e-09	A. integerrimus|evm.model.ctg028260_np12.18/A. integerrimus|evm.model.ctg023050_np12.152/A. integerrimus|evm.model.ctg021490_np12.5/A. integerrimus|evm.model.ctg011250_np12.10/A. integerrimus|evm.model.ctg009700_np12.70/A. integerrimus|evm.model.ctg019130_np12.40/A. integerrimus|evm.model.ctg017880_np12.76/A. integerrimus|evm.model.ctg019910_np12.15/A. integerrimus|evm.model.ctg021870_np12.37/A. …	12
GO:0050906	GO:0050906	detection of stimulus involved in sensory perception	32/494	226/12875	1.46775654146664e-10	3.24763239566686e-09	2.82941020041762e-09	A. integerrimus|evm.model.ctg027350_np12.137/A. integerrimus|evm.model.ctg027350_np12.170/A. integerrimus|evm.model.ctg025520_np12.3/A. integerrimus|evm.model.ctg019070_np12.14/A. integerrimus|evm.model.ctg019070_np12.34/A. integerrimus|evm.model.ctg025520_np12.5/A. integerrimus|evm.model.ctg029080_np12.5/A. integerrimus|evm.model.ctg014250_np12.73/A. integerrimus|evm.model.ctg017650_np12.56/A. i…	32
GO:0001829	GO:0001829	trophectodermal cell differentiation	12/494	28/12875	1.55008325535573e-10	3.32950631398924e-09	2.90074059481774e-09	A. integerrimus|evm.model.ctg028260_np12.18/A. integerrimus|evm.model.ctg023050_np12.152/A. integerrimus|evm.model.ctg021490_np12.5/A. integerrimus|evm.model.ctg011250_np12.10/A. integerrimus|evm.model.ctg009700_np12.70/A. integerrimus|evm.model.ctg019130_np12.40/A. integerrimus|evm.model.ctg017880_np12.76/A. integerrimus|evm.model.ctg019910_np12.15/A. integerrimus|evm.model.ctg021870_np12.37/A. …	12
GO:0009151	GO:0009151	purine deoxyribonucleotide metabolic process	12/494	28/12875	1.55008325535573e-10	3.32950631398924e-09	2.90074059481774e-09	A. integerrimus|evm.model.ctg028260_np12.18/A. integerrimus|evm.model.ctg023050_np12.152/A. integerrimus|evm.model.ctg021490_np12.5/A. integerrimus|evm.model.ctg011250_np12.10/A. integerrimus|evm.model.ctg009700_np12.70/A. integerrimus|evm.model.ctg019130_np12.40/A. integerrimus|evm.model.ctg017880_np12.76/A. integerrimus|evm.model.ctg019910_np12.15/A. integerrimus|evm.model.ctg021870_np12.37/A. …	12
GO:0042454	GO:0042454	ribonucleoside catabolic process	12/494	28/12875	1.55008325535573e-10	3.32950631398924e-09	2.90074059481774e-09	A. integerrimus|evm.model.ctg028260_np12.18/A. integerrimus|evm.model.ctg023050_np12.152/A. integerrimus|evm.model.ctg021490_np12.5/A. integerrimus|evm.model.ctg011250_np12.10/A. integerrimus|evm.model.ctg009700_np12.70/A. integerrimus|evm.model.ctg019130_np12.40/A. integerrimus|evm.model.ctg017880_np12.76/A. integerrimus|evm.model.ctg019910_np12.15/A. integerrimus|evm.model.ctg021870_np12.37/A. …	12
GO:0070229	GO:0070229	negative regulation of lymphocyte apoptotic process	12/494	28/12875	1.55008325535573e-10	3.32950631398924e-09	2.90074059481774e-09	A. integerrimus|evm.model.ctg028260_np12.18/A. integerrimus|evm.model.ctg023050_np12.152/A. integerrimus|evm.model.ctg021490_np12.5/A. integerrimus|evm.model.ctg011250_np12.10/A. integerrimus|evm.model.ctg009700_np12.70/A. integerrimus|evm.model.ctg019130_np12.40/A. integerrimus|evm.model.ctg017880_np12.76/A. integerrimus|evm.model.ctg019910_np12.15/A. integerrimus|evm.model.ctg021870_np12.37/A. …	12
GO:0070232	GO:0070232	regulation of T cell apoptotic process	12/494	28/12875	1.55008325535573e-10	3.32950631398924e-09	2.90074059481774e-09	A. integerrimus|evm.model.ctg028260_np12.18/A. integerrimus|evm.model.ctg023050_np12.152/A. integerrimus|evm.model.ctg021490_np12.5/A. integerrimus|evm.model.ctg011250_np12.10/A. integerrimus|evm.model.ctg009700_np12.70/A. integerrimus|evm.model.ctg019130_np12.40/A. integerrimus|evm.model.ctg017880_np12.76/A. integerrimus|evm.model.ctg019910_np12.15/A. integerrimus|evm.model.ctg021870_np12.37/A. …	12
GO:0015291	GO:0015291	secondary active transmembrane transporter activity	35/494	269/12875	2.15362444680604e-10	4.59898987972011e-09	4.00674315684845e-09	A. integerrimus|evm.model.ctg021930_np12.128/A. integerrimus|evm.model.ctg018440_np12.504/A. integerrimus|evm.model.ctg030550_np12.192/A. integerrimus|evm.model.ctg005780_np12.111/A. integerrimus|evm.model.ctg013130_np12.25/A. integerrimus|evm.model.ctg011570_np12.114/A. integerrimus|evm.model.ctg012130_np12.70/A. integerrimus|evm.model.ctg024520_np12.507/A. integerrimus|evm.model.ctg014310_np12.…	35
GO:0009264	GO:0009264	deoxyribonucleotide catabolic process	12/494	29/12875	2.5530145253262e-10	5.42035974076481e-09	4.72233900638371e-09	A. integerrimus|evm.model.ctg028260_np12.18/A. integerrimus|evm.model.ctg023050_np12.152/A. integerrimus|evm.model.ctg021490_np12.5/A. integerrimus|evm.model.ctg011250_np12.10/A. integerrimus|evm.model.ctg009700_np12.70/A. integerrimus|evm.model.ctg019130_np12.40/A. integerrimus|evm.model.ctg017880_np12.76/A. integerrimus|evm.model.ctg019910_np12.15/A. integerrimus|evm.model.ctg021870_np12.37/A. …	12
GO:0042626	GO:0042626	ATPase-coupled transmembrane transporter activity	25/494	147/12875	3.15546334788551e-10	6.66092923953073e-09	5.80315098461702e-09	A. integerrimus|evm.model.ctg020090_np12.120/A. integerrimus|evm.model.ctg016730_np12.22/A. integerrimus|evm.model.ctg015520_np12.6/A. integerrimus|evm.model.ctg029050_np12.204/A. integerrimus|evm.model.ctg018280_np12.28/A. integerrimus|evm.model.ctg029050_np12.193/A. integerrimus|evm.model.ctg019620_np12.254/A. integerrimus|evm.model.ctg019620_np12.252/A. integerrimus|evm.model.ctg019620_np12.26…	25
GO:0033762	GO:0033762	response to glucagon	14/494	43/12875	3.518096072214e-10	7.383981070424e-09	6.43308996061988e-09	A. integerrimus|evm.model.ctg015520_np12.6/A. integerrimus|evm.model.ctg029050_np12.204/A. integerrimus|evm.model.ctg018280_np12.28/A. integerrimus|evm.model.ctg029050_np12.193/A. integerrimus|evm.model.ctg019620_np12.254/A. integerrimus|evm.model.ctg019620_np12.252/A. integerrimus|evm.model.ctg019620_np12.263/A. integerrimus|evm.model.ctg017440_np12.6/A. integerrimus|evm.model.ctg015860_np12.1/A…	14
GO:0010460	GO:0010460	positive regulation of heart rate	12/494	30/12875	4.10821988296251e-10	8.52513651419283e-09	7.42729018388703e-09	A. integerrimus|evm.model.ctg028260_np12.18/A. integerrimus|evm.model.ctg023050_np12.152/A. integerrimus|evm.model.ctg021490_np12.5/A. integerrimus|evm.model.ctg011250_np12.10/A. integerrimus|evm.model.ctg009700_np12.70/A. integerrimus|evm.model.ctg019130_np12.40/A. integerrimus|evm.model.ctg017880_np12.76/A. integerrimus|evm.model.ctg019910_np12.15/A. integerrimus|evm.model.ctg021870_np12.37/A. …	12
GO:0046386	GO:0046386	deoxyribose phosphate catabolic process	12/494	30/12875	4.10821988296251e-10	8.52513651419283e-09	7.42729018388703e-09	A. integerrimus|evm.model.ctg028260_np12.18/A. integerrimus|evm.model.ctg023050_np12.152/A. integerrimus|evm.model.ctg021490_np12.5/A. integerrimus|evm.model.ctg011250_np12.10/A. integerrimus|evm.model.ctg009700_np12.70/A. integerrimus|evm.model.ctg019130_np12.40/A. integerrimus|evm.model.ctg017880_np12.76/A. integerrimus|evm.model.ctg019910_np12.15/A. integerrimus|evm.model.ctg021870_np12.37/A. …	12
GO:0055081	GO:0055081	monoatomic anion homeostasis	14/494	44/12875	4.98064898082849e-10	1.02774852284174e-08	8.95397569587145e-09	A. integerrimus|evm.model.ctg015520_np12.6/A. integerrimus|evm.model.ctg029050_np12.204/A. integerrimus|evm.model.ctg018280_np12.28/A. integerrimus|evm.model.ctg029050_np12.193/A. integerrimus|evm.model.ctg019620_np12.254/A. integerrimus|evm.model.ctg019620_np12.252/A. integerrimus|evm.model.ctg019620_np12.263/A. integerrimus|evm.model.ctg017440_np12.6/A. integerrimus|evm.model.ctg015860_np12.1/A…	14
GO:0045987	GO:0045987	positive regulation of smooth muscle contraction	13/494	37/12875	5.11785530946611e-10	1.05016103640609e-08	9.14923854206232e-09	A. integerrimus|evm.model.ctg028260_np12.18/A. integerrimus|evm.model.ctg023050_np12.152/A. integerrimus|evm.model.ctg021490_np12.5/A. integerrimus|evm.model.ctg011250_np12.10/A. integerrimus|evm.model.ctg009700_np12.70/A. integerrimus|evm.model.ctg019130_np12.40/A. integerrimus|evm.model.ctg017880_np12.76/A. integerrimus|evm.model.ctg019910_np12.15/A. integerrimus|evm.model.ctg021870_np12.37/A. …	13
GO:0009143	GO:0009143	nucleoside triphosphate catabolic process	12/494	31/12875	6.47166302116388e-10	1.32057879315194e-08	1.15051787042913e-08	A. integerrimus|evm.model.ctg028260_np12.18/A. integerrimus|evm.model.ctg023050_np12.152/A. integerrimus|evm.model.ctg021490_np12.5/A. integerrimus|evm.model.ctg011250_np12.10/A. integerrimus|evm.model.ctg009700_np12.70/A. integerrimus|evm.model.ctg019130_np12.40/A. integerrimus|evm.model.ctg017880_np12.76/A. integerrimus|evm.model.ctg019910_np12.15/A. integerrimus|evm.model.ctg021870_np12.37/A. …	12
GO:0050848	GO:0050848	regulation of calcium-mediated signaling	20/494	98/12875	6.93029428415665e-10	1.40635198374074e-08	1.22524539830394e-08	A. integerrimus|evm.model.ctg015580_np12.15/A. integerrimus|evm.model.ctg015580_np12.52/A. integerrimus|evm.model.ctg007670_np12.238/A. integerrimus|evm.model.ctg007670_np12.379/A. integerrimus|evm.model.ctg007670_np12.242/A. integerrimus|evm.model.ctg014950_np12.35/A. integerrimus|evm.model.ctg016670_np12.1/A. integerrimus|evm.model.ctg004810_np12.285/A. integerrimus|evm.model.ctg028260_np12.18/…	20
GO:0042623	GO:0042623	GO:0042623	41/494	369/12875	8.1845633605272e-10	1.65175281446244e-08	1.43904410734544e-08	A. integerrimus|evm.model.ctg020090_np12.120/A. integerrimus|evm.model.ctg016730_np12.22/A. integerrimus|evm.model.ctg015520_np12.6/A. integerrimus|evm.model.ctg029050_np12.204/A. integerrimus|evm.model.ctg018280_np12.28/A. integerrimus|evm.model.ctg029050_np12.193/A. integerrimus|evm.model.ctg019620_np12.254/A. integerrimus|evm.model.ctg019620_np12.252/A. integerrimus|evm.model.ctg019620_np12.26…	41
GO:0015908	GO:0015908	fatty acid transport	19/494	89/12875	8.28009724400514e-10	1.66190148509458e-08	1.44788585687522e-08	A. integerrimus|evm.model.ctg015520_np12.6/A. integerrimus|evm.model.ctg029050_np12.204/A. integerrimus|evm.model.ctg018280_np12.28/A. integerrimus|evm.model.ctg029050_np12.193/A. integerrimus|evm.model.ctg019620_np12.254/A. integerrimus|evm.model.ctg019620_np12.252/A. integerrimus|evm.model.ctg019620_np12.263/A. integerrimus|evm.model.ctg017440_np12.6/A. integerrimus|evm.model.ctg015860_np12.1/A…	19
GO:0042451	GO:0042451	purine nucleoside biosynthetic process	12/494	32/12875	9.99752492675323e-10	1.97424242236369e-08	1.72000428847367e-08	A. integerrimus|evm.model.ctg028260_np12.18/A. integerrimus|evm.model.ctg023050_np12.152/A. integerrimus|evm.model.ctg021490_np12.5/A. integerrimus|evm.model.ctg011250_np12.10/A. integerrimus|evm.model.ctg009700_np12.70/A. integerrimus|evm.model.ctg019130_np12.40/A. integerrimus|evm.model.ctg017880_np12.76/A. integerrimus|evm.model.ctg019910_np12.15/A. integerrimus|evm.model.ctg021870_np12.37/A. …	12
GO:0046129	GO:0046129	purine ribonucleoside biosynthetic process	12/494	32/12875	9.99752492675323e-10	1.97424242236369e-08	1.72000428847367e-08	A. integerrimus|evm.model.ctg028260_np12.18/A. integerrimus|evm.model.ctg023050_np12.152/A. integerrimus|evm.model.ctg021490_np12.5/A. integerrimus|evm.model.ctg011250_np12.10/A. integerrimus|evm.model.ctg009700_np12.70/A. integerrimus|evm.model.ctg019130_np12.40/A. integerrimus|evm.model.ctg017880_np12.76/A. integerrimus|evm.model.ctg019910_np12.15/A. integerrimus|evm.model.ctg021870_np12.37/A. …	12
GO:2000107	GO:2000107	negative regulation of leukocyte apoptotic process	12/494	32/12875	9.99752492675323e-10	1.97424242236369e-08	1.72000428847367e-08	A. integerrimus|evm.model.ctg028260_np12.18/A. integerrimus|evm.model.ctg023050_np12.152/A. integerrimus|evm.model.ctg021490_np12.5/A. integerrimus|evm.model.ctg011250_np12.10/A. integerrimus|evm.model.ctg009700_np12.70/A. integerrimus|evm.model.ctg019130_np12.40/A. integerrimus|evm.model.ctg017880_np12.76/A. integerrimus|evm.model.ctg019910_np12.15/A. integerrimus|evm.model.ctg021870_np12.37/A. …	12
GO:0015399	GO:0015399	primary active transmembrane transporter activity	25/494	157/12875	1.32324842411444e-09	2.58526141583636e-08	2.25233774317352e-08	A. integerrimus|evm.model.ctg020090_np12.120/A. integerrimus|evm.model.ctg016730_np12.22/A. integerrimus|evm.model.ctg015520_np12.6/A. integerrimus|evm.model.ctg029050_np12.204/A. integerrimus|evm.model.ctg018280_np12.28/A. integerrimus|evm.model.ctg029050_np12.193/A. integerrimus|evm.model.ctg019620_np12.254/A. integerrimus|evm.model.ctg019620_np12.252/A. integerrimus|evm.model.ctg019620_np12.26…	25
GO:0015405	GO:0015405	GO:0015405	25/494	157/12875	1.32324842411444e-09	2.58526141583636e-08	2.25233774317352e-08	A. integerrimus|evm.model.ctg020090_np12.120/A. integerrimus|evm.model.ctg016730_np12.22/A. integerrimus|evm.model.ctg015520_np12.6/A. integerrimus|evm.model.ctg029050_np12.204/A. integerrimus|evm.model.ctg018280_np12.28/A. integerrimus|evm.model.ctg029050_np12.193/A. integerrimus|evm.model.ctg019620_np12.254/A. integerrimus|evm.model.ctg019620_np12.252/A. integerrimus|evm.model.ctg019620_np12.26…	25
GO:0035640	GO:0035640	exploration behavior	14/494	47/12875	1.33131056916314e-09	2.58725064578636e-08	2.25407080493231e-08	A. integerrimus|evm.model.ctg017800_np12.410/A. integerrimus|evm.model.ctg013790_np12.35/A. integerrimus|evm.model.ctg015510_np12.13/A. integerrimus|evm.model.ctg028310_np12.28/A. integerrimus|evm.model.ctg028310_np12.100/A. integerrimus|evm.model.ctg017800_np12.240/A. integerrimus|evm.model.ctg017800_np12.116/A. integerrimus|evm.model.ctg020980_np12.19/A. integerrimus|evm.model.ctg006290_np12.1/…	14
GO:0042321	GO:0042321	negative regulation of circadian sleep/wake cycle, sleep	12/494	33/12875	1.51686269481609e-09	2.91698255395786e-08	2.54134064052958e-08	A. integerrimus|evm.model.ctg028260_np12.18/A. integerrimus|evm.model.ctg023050_np12.152/A. integerrimus|evm.model.ctg021490_np12.5/A. integerrimus|evm.model.ctg011250_np12.10/A. integerrimus|evm.model.ctg009700_np12.70/A. integerrimus|evm.model.ctg019130_np12.40/A. integerrimus|evm.model.ctg017880_np12.76/A. integerrimus|evm.model.ctg019910_np12.15/A. integerrimus|evm.model.ctg021870_np12.37/A. …	12
GO:0046638	GO:0046638	positive regulation of alpha-beta T cell differentiation	12/494	33/12875	1.51686269481609e-09	2.91698255395786e-08	2.54134064052958e-08	A. integerrimus|evm.model.ctg028260_np12.18/A. integerrimus|evm.model.ctg023050_np12.152/A. integerrimus|evm.model.ctg021490_np12.5/A. integerrimus|evm.model.ctg011250_np12.10/A. integerrimus|evm.model.ctg009700_np12.70/A. integerrimus|evm.model.ctg019130_np12.40/A. integerrimus|evm.model.ctg017880_np12.76/A. integerrimus|evm.model.ctg019910_np12.15/A. integerrimus|evm.model.ctg021870_np12.37/A. …	12
GO:0033628	GO:0033628	regulation of cell adhesion mediated by integrin	13/494	40/12875	1.55530218821453e-09	2.97532548818332e-08	2.59217031369089e-08	A. integerrimus|evm.model.ctg007360_np12.220/A. integerrimus|evm.model.ctg028260_np12.18/A. integerrimus|evm.model.ctg023050_np12.152/A. integerrimus|evm.model.ctg021490_np12.5/A. integerrimus|evm.model.ctg011250_np12.10/A. integerrimus|evm.model.ctg009700_np12.70/A. integerrimus|evm.model.ctg019130_np12.40/A. integerrimus|evm.model.ctg017880_np12.76/A. integerrimus|evm.model.ctg019910_np12.15/A.…	13
GO:0009164	GO:0009164	nucleoside catabolic process	12/494	34/12875	2.2634148788754e-09	4.28532105675739e-08	3.73346784144396e-08	A. integerrimus|evm.model.ctg028260_np12.18/A. integerrimus|evm.model.ctg023050_np12.152/A. integerrimus|evm.model.ctg021490_np12.5/A. integerrimus|evm.model.ctg011250_np12.10/A. integerrimus|evm.model.ctg009700_np12.70/A. integerrimus|evm.model.ctg019130_np12.40/A. integerrimus|evm.model.ctg017880_np12.76/A. integerrimus|evm.model.ctg019910_np12.15/A. integerrimus|evm.model.ctg021870_np12.37/A. …	12
GO:0045744	GO:0045744	negative regulation of G protein-coupled receptor signaling pathway	12/494	34/12875	2.2634148788754e-09	4.28532105675739e-08	3.73346784144396e-08	A. integerrimus|evm.model.ctg028260_np12.18/A. integerrimus|evm.model.ctg023050_np12.152/A. integerrimus|evm.model.ctg021490_np12.5/A. integerrimus|evm.model.ctg011250_np12.10/A. integerrimus|evm.model.ctg009700_np12.70/A. integerrimus|evm.model.ctg019130_np12.40/A. integerrimus|evm.model.ctg017880_np12.76/A. integerrimus|evm.model.ctg019910_np12.15/A. integerrimus|evm.model.ctg021870_np12.37/A. …	12
GO:0045117	GO:0045117	azole transmembrane transport	14/494	49/12875	2.45176644579782e-09	4.61812213098225e-08	4.02341160336052e-08	A. integerrimus|evm.model.ctg023400_np12.16/A. integerrimus|evm.model.ctg006080_np12.22/A. integerrimus|evm.model.ctg028260_np12.18/A. integerrimus|evm.model.ctg023050_np12.152/A. integerrimus|evm.model.ctg021490_np12.5/A. integerrimus|evm.model.ctg011250_np12.10/A. integerrimus|evm.model.ctg009700_np12.70/A. integerrimus|evm.model.ctg019130_np12.40/A. integerrimus|evm.model.ctg017880_np12.76/A. …	14
GO:0031526	GO:0031526	brush border membrane	20/494	105/12875	2.48935367456301e-09	4.66499798299487e-08	4.06425089724574e-08	A. integerrimus|evm.model.ctg017330_np12.76/A. integerrimus|evm.model.ctg019260_np12.157/A. integerrimus|evm.model.ctg002360_np12.42/A. integerrimus|evm.model.ctg018040_np12.257/A. integerrimus|evm.model.ctg015520_np12.6/A. integerrimus|evm.model.ctg029050_np12.204/A. integerrimus|evm.model.ctg018280_np12.28/A. integerrimus|evm.model.ctg029050_np12.193/A. integerrimus|evm.model.ctg019620_np12.254…	20
GO:0033081	GO:0033081	regulation of T cell differentiation in thymus	12/494	35/12875	3.32558905281834e-09	6.13813497035264e-08	5.34768088895411e-08	A. integerrimus|evm.model.ctg028260_np12.18/A. integerrimus|evm.model.ctg023050_np12.152/A. integerrimus|evm.model.ctg021490_np12.5/A. integerrimus|evm.model.ctg011250_np12.10/A. integerrimus|evm.model.ctg009700_np12.70/A. integerrimus|evm.model.ctg019130_np12.40/A. integerrimus|evm.model.ctg017880_np12.76/A. integerrimus|evm.model.ctg019910_np12.15/A. integerrimus|evm.model.ctg021870_np12.37/A. …	12
GO:0046112	GO:0046112	nucleobase biosynthetic process	12/494	35/12875	3.32558905281834e-09	6.13813497035264e-08	5.34768088895411e-08	A. integerrimus|evm.model.ctg028260_np12.18/A. integerrimus|evm.model.ctg023050_np12.152/A. integerrimus|evm.model.ctg021490_np12.5/A. integerrimus|evm.model.ctg011250_np12.10/A. integerrimus|evm.model.ctg009700_np12.70/A. integerrimus|evm.model.ctg019130_np12.40/A. integerrimus|evm.model.ctg017880_np12.76/A. integerrimus|evm.model.ctg019910_np12.15/A. integerrimus|evm.model.ctg021870_np12.37/A. …	12
GO:0050856	GO:0050856	regulation of T cell receptor signaling pathway	12/494	35/12875	3.32558905281834e-09	6.13813497035264e-08	5.34768088895411e-08	A. integerrimus|evm.model.ctg028260_np12.18/A. integerrimus|evm.model.ctg023050_np12.152/A. integerrimus|evm.model.ctg021490_np12.5/A. integerrimus|evm.model.ctg011250_np12.10/A. integerrimus|evm.model.ctg009700_np12.70/A. integerrimus|evm.model.ctg019130_np12.40/A. integerrimus|evm.model.ctg017880_np12.76/A. integerrimus|evm.model.ctg019910_np12.15/A. integerrimus|evm.model.ctg021870_np12.37/A. …	12
GO:0030888	GO:0030888	regulation of B cell proliferation	13/494	43/12875	4.2535723771468e-09	7.77282156281602e-08	6.77185652083073e-08	A. integerrimus|evm.model.ctg020090_np12.120/A. integerrimus|evm.model.ctg028260_np12.18/A. integerrimus|evm.model.ctg023050_np12.152/A. integerrimus|evm.model.ctg021490_np12.5/A. integerrimus|evm.model.ctg011250_np12.10/A. integerrimus|evm.model.ctg009700_np12.70/A. integerrimus|evm.model.ctg019130_np12.40/A. integerrimus|evm.model.ctg017880_np12.76/A. integerrimus|evm.model.ctg019910_np12.15/A.…	13
GO:0043278	GO:0043278	response to morphine	13/494	43/12875	4.2535723771468e-09	7.77282156281602e-08	6.77185652083073e-08	A. integerrimus|evm.model.ctg017670_np12.79/A. integerrimus|evm.model.ctg028260_np12.18/A. integerrimus|evm.model.ctg023050_np12.152/A. integerrimus|evm.model.ctg021490_np12.5/A. integerrimus|evm.model.ctg011250_np12.10/A. integerrimus|evm.model.ctg009700_np12.70/A. integerrimus|evm.model.ctg019130_np12.40/A. integerrimus|evm.model.ctg017880_np12.76/A. integerrimus|evm.model.ctg019910_np12.15/A. …	13
GO:0009200	GO:0009200	deoxyribonucleoside triphosphate metabolic process	12/494	36/12875	4.81644508687705e-09	8.75782317034624e-08	7.63001201881513e-08	A. integerrimus|evm.model.ctg028260_np12.18/A. integerrimus|evm.model.ctg023050_np12.152/A. integerrimus|evm.model.ctg021490_np12.5/A. integerrimus|evm.model.ctg011250_np12.10/A. integerrimus|evm.model.ctg009700_np12.70/A. integerrimus|evm.model.ctg019130_np12.40/A. integerrimus|evm.model.ctg017880_np12.76/A. integerrimus|evm.model.ctg019910_np12.15/A. integerrimus|evm.model.ctg021870_np12.37/A. …	12
GO:0007062	GO:0007062	sister chromatid cohesion	14/494	52/12875	5.77713196768675e-09	1.04529092203514e-07	9.10680901310227e-08	A. integerrimus|evm.model.ctg023320_np12.228/A. integerrimus|evm.model.ctg025540_np12.36/A. integerrimus|evm.model.ctg008930_np12.180/A. integerrimus|evm.model.ctg018670_np12.19/A. integerrimus|evm.model.ctg025420_np12.102/A. integerrimus|evm.model.ctg018680_np12.33/A. integerrimus|evm.model.ctg004400_np12.33/A. integerrimus|evm.model.ctg019020_np12.583/A. integerrimus|evm.model.ctg018390_np12.28…	14
GO:0014072	GO:0014072	response to isoquinoline alkaloid	13/494	44/12875	5.82846261030271e-09	1.04940897880597e-07	9.14268644753367e-08	A. integerrimus|evm.model.ctg017670_np12.79/A. integerrimus|evm.model.ctg028260_np12.18/A. integerrimus|evm.model.ctg023050_np12.152/A. integerrimus|evm.model.ctg021490_np12.5/A. integerrimus|evm.model.ctg011250_np12.10/A. integerrimus|evm.model.ctg009700_np12.70/A. integerrimus|evm.model.ctg019130_np12.40/A. integerrimus|evm.model.ctg017880_np12.76/A. integerrimus|evm.model.ctg019910_np12.15/A. …	13
GO:0042754	GO:0042754	negative regulation of circadian rhythm	12/494	37/12875	6.8826816737237e-09	1.22718882464015e-07	1.0691544347532e-07	A. integerrimus|evm.model.ctg028260_np12.18/A. integerrimus|evm.model.ctg023050_np12.152/A. integerrimus|evm.model.ctg021490_np12.5/A. integerrimus|evm.model.ctg011250_np12.10/A. integerrimus|evm.model.ctg009700_np12.70/A. integerrimus|evm.model.ctg019130_np12.40/A. integerrimus|evm.model.ctg017880_np12.76/A. integerrimus|evm.model.ctg019910_np12.15/A. integerrimus|evm.model.ctg021870_np12.37/A. …	12
GO:0046635	GO:0046635	positive regulation of alpha-beta T cell activation	12/494	37/12875	6.8826816737237e-09	1.22718882464015e-07	1.0691544347532e-07	A. integerrimus|evm.model.ctg028260_np12.18/A. integerrimus|evm.model.ctg023050_np12.152/A. integerrimus|evm.model.ctg021490_np12.5/A. integerrimus|evm.model.ctg011250_np12.10/A. integerrimus|evm.model.ctg009700_np12.70/A. integerrimus|evm.model.ctg019130_np12.40/A. integerrimus|evm.model.ctg017880_np12.76/A. integerrimus|evm.model.ctg019910_np12.15/A. integerrimus|evm.model.ctg021870_np12.37/A. …	12
GO:0002312	GO:0002312	B cell activation involved in immune response	12/494	38/12875	9.71269807000469e-09	1.7234173918419e-07	1.50147989487995e-07	A. integerrimus|evm.model.ctg028260_np12.18/A. integerrimus|evm.model.ctg023050_np12.152/A. integerrimus|evm.model.ctg021490_np12.5/A. integerrimus|evm.model.ctg011250_np12.10/A. integerrimus|evm.model.ctg009700_np12.70/A. integerrimus|evm.model.ctg019130_np12.40/A. integerrimus|evm.model.ctg017880_np12.76/A. integerrimus|evm.model.ctg019910_np12.15/A. integerrimus|evm.model.ctg021870_np12.37/A. …	12
GO:0015077	GO:0015077	GO:0015077	40/494	386/12875	1.00082899127641e-08	1.76732927161454e-07	1.53973690965601e-07	A. integerrimus|evm.model.ctg021930_np12.128/A. integerrimus|evm.model.ctg018440_np12.504/A. integerrimus|evm.model.ctg030550_np12.192/A. integerrimus|evm.model.ctg005780_np12.111/A. integerrimus|evm.model.ctg013130_np12.25/A. integerrimus|evm.model.ctg011570_np12.114/A. integerrimus|evm.model.ctg012130_np12.70/A. integerrimus|evm.model.ctg024520_np12.507/A. integerrimus|evm.model.ctg014310_np12.…	40
GO:0001825	GO:0001825	blastocyst formation	12/494	39/12875	1.35461320899816e-08	2.38061929026327e-07	2.07404893243737e-07	A. integerrimus|evm.model.ctg028260_np12.18/A. integerrimus|evm.model.ctg023050_np12.152/A. integerrimus|evm.model.ctg021490_np12.5/A. integerrimus|evm.model.ctg011250_np12.10/A. integerrimus|evm.model.ctg009700_np12.70/A. integerrimus|evm.model.ctg019130_np12.40/A. integerrimus|evm.model.ctg017880_np12.76/A. integerrimus|evm.model.ctg019910_np12.15/A. integerrimus|evm.model.ctg021870_np12.37/A. …	12
GO:0016887	GO:0016887	ATP hydrolysis activity	43/494	439/12875	1.47929829354579e-08	2.58736315818747e-07	2.25416882826025e-07	A. integerrimus|evm.model.ctg020090_np12.120/A. integerrimus|evm.model.ctg016730_np12.22/A. integerrimus|evm.model.ctg015520_np12.6/A. integerrimus|evm.model.ctg029050_np12.204/A. integerrimus|evm.model.ctg018280_np12.28/A. integerrimus|evm.model.ctg029050_np12.193/A. integerrimus|evm.model.ctg019620_np12.254/A. integerrimus|evm.model.ctg019620_np12.252/A. integerrimus|evm.model.ctg019620_np12.26…	43
GO:0030317	GO:0030317	flagellated sperm motility	17/494	84/12875	1.52272771645932e-08	2.65070090168487e-07	2.30935009131271e-07	A. integerrimus|evm.model.ctg015380_np12.3/A. integerrimus|evm.model.ctg022290_np12.55/A. integerrimus|evm.model.ctg028100_np12.31/A. integerrimus|evm.model.ctg020310_np12.29/A. integerrimus|evm.model.ctg016780_np12.92/A. integerrimus|evm.model.ctg024200_np12.230/A. integerrimus|evm.model.ctg016780_np12.66/A. integerrimus|evm.model.ctg001280_np12.17/A. integerrimus|evm.model.ctg020460_np12.86/A. …	17
GO:0002686	GO:0002686	negative regulation of leukocyte migration	12/494	40/12875	1.86850591907388e-08	3.23727464186715e-07	2.82038629294171e-07	A. integerrimus|evm.model.ctg028260_np12.18/A. integerrimus|evm.model.ctg023050_np12.152/A. integerrimus|evm.model.ctg021490_np12.5/A. integerrimus|evm.model.ctg011250_np12.10/A. integerrimus|evm.model.ctg009700_np12.70/A. integerrimus|evm.model.ctg019130_np12.40/A. integerrimus|evm.model.ctg017880_np12.76/A. integerrimus|evm.model.ctg019910_np12.15/A. integerrimus|evm.model.ctg021870_np12.37/A. …	12
GO:0045823	GO:0045823	positive regulation of heart contraction	12/494	41/12875	2.55070482535821e-08	4.38913924335481e-07	3.82391657466251e-07	A. integerrimus|evm.model.ctg028260_np12.18/A. integerrimus|evm.model.ctg023050_np12.152/A. integerrimus|evm.model.ctg021490_np12.5/A. integerrimus|evm.model.ctg011250_np12.10/A. integerrimus|evm.model.ctg009700_np12.70/A. integerrimus|evm.model.ctg019130_np12.40/A. integerrimus|evm.model.ctg017880_np12.76/A. integerrimus|evm.model.ctg019910_np12.15/A. integerrimus|evm.model.ctg021870_np12.37/A. …	12
GO:0006835	GO:0006835	dicarboxylic acid transport	15/494	67/12875	2.55724420930555e-08	4.38913924335481e-07	3.82391657466251e-07	A. integerrimus|evm.model.ctg016130_np12.42/A. integerrimus|evm.model.ctg015520_np12.6/A. integerrimus|evm.model.ctg029050_np12.204/A. integerrimus|evm.model.ctg018280_np12.28/A. integerrimus|evm.model.ctg029050_np12.193/A. integerrimus|evm.model.ctg019620_np12.254/A. integerrimus|evm.model.ctg019620_np12.252/A. integerrimus|evm.model.ctg019620_np12.263/A. integerrimus|evm.model.ctg017440_np12.6/…	15
GO:0097722	GO:0097722	sperm motility	17/494	87/12875	2.65039864512369e-08	4.52786708071595e-07	3.94477937878874e-07	A. integerrimus|evm.model.ctg015380_np12.3/A. integerrimus|evm.model.ctg022290_np12.55/A. integerrimus|evm.model.ctg028100_np12.31/A. integerrimus|evm.model.ctg020310_np12.29/A. integerrimus|evm.model.ctg016780_np12.92/A. integerrimus|evm.model.ctg024200_np12.230/A. integerrimus|evm.model.ctg016780_np12.66/A. integerrimus|evm.model.ctg001280_np12.17/A. integerrimus|evm.model.ctg020460_np12.86/A. …	17
GO:0005918	GO:0005918	septate junction	18/494	98/12875	2.85341500806384e-08	4.85212653917522e-07	4.22728149342791e-07	A. integerrimus|evm.model.ctg017800_np12.389/A. integerrimus|evm.model.ctg017800_np12.410/A. integerrimus|evm.model.ctg013790_np12.35/A. integerrimus|evm.model.ctg015510_np12.13/A. integerrimus|evm.model.ctg028310_np12.28/A. integerrimus|evm.model.ctg028310_np12.100/A. integerrimus|evm.model.ctg017800_np12.240/A. integerrimus|evm.model.ctg018390_np12.6/A. integerrimus|evm.model.ctg017800_np12.116…	18
GO:0060076	GO:0060076	excitatory synapse	13/494	50/12875	3.22563968524061e-08	5.45980394649251e-07	4.75670368330412e-07	A. integerrimus|evm.model.ctg017670_np12.79/A. integerrimus|evm.model.ctg017800_np12.410/A. integerrimus|evm.model.ctg013790_np12.35/A. integerrimus|evm.model.ctg015510_np12.13/A. integerrimus|evm.model.ctg028310_np12.28/A. integerrimus|evm.model.ctg028310_np12.100/A. integerrimus|evm.model.ctg017800_np12.240/A. integerrimus|evm.model.ctg017800_np12.116/A. integerrimus|evm.model.ctg020980_np12.19…	13
GO:0004652	GO:0004652	GO:0004652	7/494	11/12875	3.38905558271439e-08	5.71009227307796e-07	4.9747604883881e-07	A. integerrimus|evm.model.ctg023320_np12.228/A. integerrimus|evm.model.ctg025540_np12.36/A. integerrimus|evm.model.ctg008930_np12.180/A. integerrimus|evm.model.ctg018670_np12.19/A. integerrimus|evm.model.ctg025420_np12.102/A. integerrimus|evm.model.ctg018680_np12.33/A. integerrimus|evm.model.ctg004400_np12.33	7
GO:0070228	GO:0070228	regulation of lymphocyte apoptotic process	12/494	42/12875	3.44802796833097e-08	5.78292544642907e-07	5.03821438294937e-07	A. integerrimus|evm.model.ctg028260_np12.18/A. integerrimus|evm.model.ctg023050_np12.152/A. integerrimus|evm.model.ctg021490_np12.5/A. integerrimus|evm.model.ctg011250_np12.10/A. integerrimus|evm.model.ctg009700_np12.70/A. integerrimus|evm.model.ctg019130_np12.40/A. integerrimus|evm.model.ctg017880_np12.76/A. integerrimus|evm.model.ctg019910_np12.15/A. integerrimus|evm.model.ctg021870_np12.37/A. …	12
GO:0019991	GO:0019991	septate junction assembly	17/494	89/12875	3.78214098479498e-08	6.31445628961453e-07	5.50129597788361e-07	A. integerrimus|evm.model.ctg017800_np12.389/A. integerrimus|evm.model.ctg017800_np12.410/A. integerrimus|evm.model.ctg013790_np12.35/A. integerrimus|evm.model.ctg015510_np12.13/A. integerrimus|evm.model.ctg028310_np12.28/A. integerrimus|evm.model.ctg028310_np12.100/A. integerrimus|evm.model.ctg017800_np12.240/A. integerrimus|evm.model.ctg018390_np12.6/A. integerrimus|evm.model.ctg017800_np12.116…	17
GO:0071216	GO:0071216	cellular response to biotic stimulus	22/494	147/12875	4.17270564574532e-08	6.88403776741281e-07	5.99752813931963e-07	A. integerrimus|evm.model.ctg028830_np12.44/A. integerrimus|evm.model.ctg015520_np12.6/A. integerrimus|evm.model.ctg029050_np12.204/A. integerrimus|evm.model.ctg018280_np12.28/A. integerrimus|evm.model.ctg029050_np12.193/A. integerrimus|evm.model.ctg019620_np12.254/A. integerrimus|evm.model.ctg019620_np12.252/A. integerrimus|evm.model.ctg019620_np12.263/A. integerrimus|evm.model.ctg017440_np12.6/…	22
GO:0045933	GO:0045933	positive regulation of muscle contraction	13/494	51/12875	4.17952742208837e-08	6.88403776741281e-07	5.99752813931963e-07	A. integerrimus|evm.model.ctg028260_np12.18/A. integerrimus|evm.model.ctg023050_np12.152/A. integerrimus|evm.model.ctg021490_np12.5/A. integerrimus|evm.model.ctg011250_np12.10/A. integerrimus|evm.model.ctg009700_np12.70/A. integerrimus|evm.model.ctg019130_np12.40/A. integerrimus|evm.model.ctg017880_np12.76/A. integerrimus|evm.model.ctg019910_np12.15/A. integerrimus|evm.model.ctg021870_np12.37/A. …	13
GO:0050871	GO:0050871	positive regulation of B cell activation	13/494	51/12875	4.17952742208837e-08	6.88403776741281e-07	5.99752813931963e-07	A. integerrimus|evm.model.ctg020090_np12.120/A. integerrimus|evm.model.ctg028260_np12.18/A. integerrimus|evm.model.ctg023050_np12.152/A. integerrimus|evm.model.ctg021490_np12.5/A. integerrimus|evm.model.ctg011250_np12.10/A. integerrimus|evm.model.ctg009700_np12.70/A. integerrimus|evm.model.ctg019130_np12.40/A. integerrimus|evm.model.ctg017880_np12.76/A. integerrimus|evm.model.ctg019910_np12.15/A.…	13
GO:0034656	GO:0034656	nucleobase-containing small molecule catabolic process	12/494	43/12875	4.6180940576018e-08	7.53878198825396e-07	6.56795599303367e-07	A. integerrimus|evm.model.ctg028260_np12.18/A. integerrimus|evm.model.ctg023050_np12.152/A. integerrimus|evm.model.ctg021490_np12.5/A. integerrimus|evm.model.ctg011250_np12.10/A. integerrimus|evm.model.ctg009700_np12.70/A. integerrimus|evm.model.ctg019130_np12.40/A. integerrimus|evm.model.ctg017880_np12.76/A. integerrimus|evm.model.ctg019910_np12.15/A. integerrimus|evm.model.ctg021870_np12.37/A. …	12
GO:0050854	GO:0050854	regulation of antigen receptor-mediated signaling pathway	12/494	43/12875	4.6180940576018e-08	7.53878198825396e-07	6.56795599303367e-07	A. integerrimus|evm.model.ctg028260_np12.18/A. integerrimus|evm.model.ctg023050_np12.152/A. integerrimus|evm.model.ctg021490_np12.5/A. integerrimus|evm.model.ctg011250_np12.10/A. integerrimus|evm.model.ctg009700_np12.70/A. integerrimus|evm.model.ctg019130_np12.40/A. integerrimus|evm.model.ctg017880_np12.76/A. integerrimus|evm.model.ctg019910_np12.15/A. integerrimus|evm.model.ctg021870_np12.37/A. …	12
GO:0043627	GO:0043627	response to estrogen	18/494	101/12875	4.65151277456128e-08	7.55973735440867e-07	6.58621277813987e-07	A. integerrimus|evm.model.ctg015520_np12.6/A. integerrimus|evm.model.ctg029050_np12.204/A. integerrimus|evm.model.ctg018280_np12.28/A. integerrimus|evm.model.ctg029050_np12.193/A. integerrimus|evm.model.ctg019620_np12.254/A. integerrimus|evm.model.ctg019620_np12.252/A. integerrimus|evm.model.ctg019620_np12.263/A. integerrimus|evm.model.ctg017440_np12.6/A. integerrimus|evm.model.ctg015860_np12.1/A…	18
GO:0009394	GO:0009394	2'-deoxyribonucleotide metabolic process	12/494	44/12875	6.13131198131613e-08	9.92084092835865e-07	8.64325918070996e-07	A. integerrimus|evm.model.ctg028260_np12.18/A. integerrimus|evm.model.ctg023050_np12.152/A. integerrimus|evm.model.ctg021490_np12.5/A. integerrimus|evm.model.ctg011250_np12.10/A. integerrimus|evm.model.ctg009700_np12.70/A. integerrimus|evm.model.ctg019130_np12.40/A. integerrimus|evm.model.ctg017880_np12.76/A. integerrimus|evm.model.ctg019910_np12.15/A. integerrimus|evm.model.ctg021870_np12.37/A. …	12
GO:0098754	GO:0098754	detoxification	18/494	103/12875	6.37438346435421e-08	1.02689080984969e-06	8.94650310786555e-07	A. integerrimus|evm.model.ctg015520_np12.6/A. integerrimus|evm.model.ctg029050_np12.204/A. integerrimus|evm.model.ctg018280_np12.28/A. integerrimus|evm.model.ctg029050_np12.193/A. integerrimus|evm.model.ctg019620_np12.254/A. integerrimus|evm.model.ctg019620_np12.252/A. integerrimus|evm.model.ctg019620_np12.263/A. integerrimus|evm.model.ctg017440_np12.6/A. integerrimus|evm.model.ctg015860_np12.1/A…	18
GO:0010587	GO:0010587	miRNA catabolic process	7/494	12/12875	7.86490118891712e-08	1.2559905246475e-06	1.0942471219363e-06	A. integerrimus|evm.model.ctg023320_np12.228/A. integerrimus|evm.model.ctg025540_np12.36/A. integerrimus|evm.model.ctg008930_np12.180/A. integerrimus|evm.model.ctg018670_np12.19/A. integerrimus|evm.model.ctg025420_np12.102/A. integerrimus|evm.model.ctg018680_np12.33/A. integerrimus|evm.model.ctg004400_np12.33	7
GO:0043634	GO:0043634	polyadenylation-dependent ncRNA catabolic process	7/494	12/12875	7.86490118891712e-08	1.2559905246475e-06	1.0942471219363e-06	A. integerrimus|evm.model.ctg023320_np12.228/A. integerrimus|evm.model.ctg025540_np12.36/A. integerrimus|evm.model.ctg008930_np12.180/A. integerrimus|evm.model.ctg018670_np12.19/A. integerrimus|evm.model.ctg025420_np12.102/A. integerrimus|evm.model.ctg018680_np12.33/A. integerrimus|evm.model.ctg004400_np12.33	7
GO:0006144	GO:0006144	purine nucleobase metabolic process	12/494	45/12875	8.07314328986036e-08	1.27264615037155e-06	1.10875787671902e-06	A. integerrimus|evm.model.ctg028260_np12.18/A. integerrimus|evm.model.ctg023050_np12.152/A. integerrimus|evm.model.ctg021490_np12.5/A. integerrimus|evm.model.ctg011250_np12.10/A. integerrimus|evm.model.ctg009700_np12.70/A. integerrimus|evm.model.ctg019130_np12.40/A. integerrimus|evm.model.ctg017880_np12.76/A. integerrimus|evm.model.ctg019910_np12.15/A. integerrimus|evm.model.ctg021870_np12.37/A. …	12
GO:0043094	GO:0043094	cellular metabolic compound salvage	12/494	45/12875	8.07314328986036e-08	1.27264615037155e-06	1.10875787671902e-06	A. integerrimus|evm.model.ctg028260_np12.18/A. integerrimus|evm.model.ctg023050_np12.152/A. integerrimus|evm.model.ctg021490_np12.5/A. integerrimus|evm.model.ctg011250_np12.10/A. integerrimus|evm.model.ctg009700_np12.70/A. integerrimus|evm.model.ctg019130_np12.40/A. integerrimus|evm.model.ctg017880_np12.76/A. integerrimus|evm.model.ctg019910_np12.15/A. integerrimus|evm.model.ctg021870_np12.37/A. …	12
GO:0048286	GO:0048286	lung alveolus development	12/494	45/12875	8.07314328986036e-08	1.27264615037155e-06	1.10875787671902e-06	A. integerrimus|evm.model.ctg028260_np12.18/A. integerrimus|evm.model.ctg023050_np12.152/A. integerrimus|evm.model.ctg021490_np12.5/A. integerrimus|evm.model.ctg011250_np12.10/A. integerrimus|evm.model.ctg009700_np12.70/A. integerrimus|evm.model.ctg019130_np12.40/A. integerrimus|evm.model.ctg017880_np12.76/A. integerrimus|evm.model.ctg019910_np12.15/A. integerrimus|evm.model.ctg021870_np12.37/A. …	12
GO:0009914	GO:0009914	hormone transport	14/494	64/12875	1.02330352097195e-07	1.60623668056836e-06	1.39938943038899e-06	A. integerrimus|evm.model.ctg015520_np12.6/A. integerrimus|evm.model.ctg029050_np12.204/A. integerrimus|evm.model.ctg018280_np12.28/A. integerrimus|evm.model.ctg029050_np12.193/A. integerrimus|evm.model.ctg019620_np12.254/A. integerrimus|evm.model.ctg019620_np12.252/A. integerrimus|evm.model.ctg019620_np12.263/A. integerrimus|evm.model.ctg017440_np12.6/A. integerrimus|evm.model.ctg015860_np12.1/A…	14
GO:0071347	GO:0071347	cellular response to interleukin-1	17/494	95/12875	1.03416933266816e-07	1.61638466335752e-06	1.40823058065452e-06	A. integerrimus|evm.model.ctg015520_np12.6/A. integerrimus|evm.model.ctg029050_np12.204/A. integerrimus|evm.model.ctg018280_np12.28/A. integerrimus|evm.model.ctg029050_np12.193/A. integerrimus|evm.model.ctg019620_np12.254/A. integerrimus|evm.model.ctg019620_np12.252/A. integerrimus|evm.model.ctg019620_np12.263/A. integerrimus|evm.model.ctg017440_np12.6/A. integerrimus|evm.model.ctg015860_np12.1/A…	17
GO:0002027	GO:0002027	regulation of heart rate	15/494	74/12875	1.05308858707199e-07	1.63450998336107e-06	1.42402176606464e-06	A. integerrimus|evm.model.ctg014950_np12.35/A. integerrimus|evm.model.ctg016670_np12.1/A. integerrimus|evm.model.ctg004810_np12.285/A. integerrimus|evm.model.ctg028260_np12.18/A. integerrimus|evm.model.ctg023050_np12.152/A. integerrimus|evm.model.ctg021490_np12.5/A. integerrimus|evm.model.ctg011250_np12.10/A. integerrimus|evm.model.ctg009700_np12.70/A. integerrimus|evm.model.ctg019130_np12.40/A. …	15
GO:0019692	GO:0019692	deoxyribose phosphate metabolic process	12/494	46/12875	1.05466612049162e-07	1.63450998336107e-06	1.42402176606464e-06	A. integerrimus|evm.model.ctg028260_np12.18/A. integerrimus|evm.model.ctg023050_np12.152/A. integerrimus|evm.model.ctg021490_np12.5/A. integerrimus|evm.model.ctg011250_np12.10/A. integerrimus|evm.model.ctg009700_np12.70/A. integerrimus|evm.model.ctg019130_np12.40/A. integerrimus|evm.model.ctg017880_np12.76/A. integerrimus|evm.model.ctg019910_np12.15/A. integerrimus|evm.model.ctg021870_np12.37/A. …	12
GO:0071548	GO:0071548	response to dexamethasone	18/494	108/12875	1.35338479544683e-07	2.08864804776311e-06	1.8196770358949e-06	A. integerrimus|evm.model.ctg015520_np12.6/A. integerrimus|evm.model.ctg029050_np12.204/A. integerrimus|evm.model.ctg018280_np12.28/A. integerrimus|evm.model.ctg029050_np12.193/A. integerrimus|evm.model.ctg019620_np12.254/A. integerrimus|evm.model.ctg019620_np12.252/A. integerrimus|evm.model.ctg019620_np12.263/A. integerrimus|evm.model.ctg017440_np12.6/A. integerrimus|evm.model.ctg015860_np12.1/A…	18
GO:0046637	GO:0046637	regulation of alpha-beta T cell differentiation	12/494	47/12875	1.36754301370699e-07	2.10166756876392e-06	1.83101993467045e-06	A. integerrimus|evm.model.ctg028260_np12.18/A. integerrimus|evm.model.ctg023050_np12.152/A. integerrimus|evm.model.ctg021490_np12.5/A. integerrimus|evm.model.ctg011250_np12.10/A. integerrimus|evm.model.ctg009700_np12.70/A. integerrimus|evm.model.ctg019130_np12.40/A. integerrimus|evm.model.ctg017880_np12.76/A. integerrimus|evm.model.ctg019910_np12.15/A. integerrimus|evm.model.ctg021870_np12.37/A. …	12
GO:0032839	GO:0032839	dendrite cytoplasm	13/494	56/12875	1.39117882613292e-07	2.1290832618276e-06	1.85490510151057e-06	A. integerrimus|evm.model.ctg029680_np12.6/A. integerrimus|evm.model.ctg028260_np12.18/A. integerrimus|evm.model.ctg023050_np12.152/A. integerrimus|evm.model.ctg021490_np12.5/A. integerrimus|evm.model.ctg011250_np12.10/A. integerrimus|evm.model.ctg009700_np12.70/A. integerrimus|evm.model.ctg019130_np12.40/A. integerrimus|evm.model.ctg017880_np12.76/A. integerrimus|evm.model.ctg019910_np12.15/A. i…	13
GO:0046685	GO:0046685	response to arsenic-containing substance	14/494	66/12875	1.54263016506961e-07	2.35107078684675e-06	2.04830561337043e-06	A. integerrimus|evm.model.ctg015520_np12.6/A. integerrimus|evm.model.ctg029050_np12.204/A. integerrimus|evm.model.ctg018280_np12.28/A. integerrimus|evm.model.ctg029050_np12.193/A. integerrimus|evm.model.ctg019620_np12.254/A. integerrimus|evm.model.ctg019620_np12.252/A. integerrimus|evm.model.ctg019620_np12.263/A. integerrimus|evm.model.ctg017440_np12.6/A. integerrimus|evm.model.ctg015860_np12.1/A…	14
GO:0043633	GO:0043633	polyadenylation-dependent RNA catabolic process	7/494	13/12875	1.64776766258082e-07	2.50093001018982e-06	2.17886633068538e-06	A. integerrimus|evm.model.ctg023320_np12.228/A. integerrimus|evm.model.ctg025540_np12.36/A. integerrimus|evm.model.ctg008930_np12.180/A. integerrimus|evm.model.ctg018670_np12.19/A. integerrimus|evm.model.ctg025420_np12.102/A. integerrimus|evm.model.ctg018680_np12.33/A. integerrimus|evm.model.ctg004400_np12.33	7
GO:0042455	GO:0042455	ribonucleoside biosynthetic process	12/494	48/12875	1.76067299805316e-07	2.66129708718076e-06	2.31858172583132e-06	A. integerrimus|evm.model.ctg028260_np12.18/A. integerrimus|evm.model.ctg023050_np12.152/A. integerrimus|evm.model.ctg021490_np12.5/A. integerrimus|evm.model.ctg011250_np12.10/A. integerrimus|evm.model.ctg009700_np12.70/A. integerrimus|evm.model.ctg019130_np12.40/A. integerrimus|evm.model.ctg017880_np12.76/A. integerrimus|evm.model.ctg019910_np12.15/A. integerrimus|evm.model.ctg021870_np12.37/A. …	12
GO:0015672	GO:0015672	GO:0015672	40/494	430/12875	1.94648777637364e-07	2.9301022961559e-06	2.55277085426051e-06	A. integerrimus|evm.model.ctg021930_np12.128/A. integerrimus|evm.model.ctg018440_np12.504/A. integerrimus|evm.model.ctg030550_np12.192/A. integerrimus|evm.model.ctg005780_np12.111/A. integerrimus|evm.model.ctg013130_np12.25/A. integerrimus|evm.model.ctg011570_np12.114/A. integerrimus|evm.model.ctg012130_np12.70/A. integerrimus|evm.model.ctg024520_np12.507/A. integerrimus|evm.model.ctg014310_np12.…	40
GO:0071222	GO:0071222	cellular response to lipopolysaccharide	19/494	124/12875	2.40485692355586e-07	3.60532223682477e-06	3.14103761444031e-06	A. integerrimus|evm.model.ctg015520_np12.6/A. integerrimus|evm.model.ctg029050_np12.204/A. integerrimus|evm.model.ctg018280_np12.28/A. integerrimus|evm.model.ctg029050_np12.193/A. integerrimus|evm.model.ctg019620_np12.254/A. integerrimus|evm.model.ctg019620_np12.252/A. integerrimus|evm.model.ctg019620_np12.263/A. integerrimus|evm.model.ctg017440_np12.6/A. integerrimus|evm.model.ctg015860_np12.1/A…	19
GO:0046873	GO:0046873	metal ion transmembrane transporter activity	41/494	451/12875	2.53227392959741e-07	3.7809114404111e-06	3.29401486776899e-06	A. integerrimus|evm.model.ctg021930_np12.128/A. integerrimus|evm.model.ctg018440_np12.504/A. integerrimus|evm.model.ctg030550_np12.192/A. integerrimus|evm.model.ctg005780_np12.111/A. integerrimus|evm.model.ctg013130_np12.25/A. integerrimus|evm.model.ctg011570_np12.114/A. integerrimus|evm.model.ctg012130_np12.70/A. integerrimus|evm.model.ctg024520_np12.507/A. integerrimus|evm.model.ctg014310_np12.…	41
GO:0097327	GO:0097327	response to antineoplastic agent	24/494	191/12875	3.03316094725865e-07	4.5104454086158e-06	3.92960122721768e-06	A. integerrimus|evm.model.ctg016130_np12.42/A. integerrimus|evm.model.ctg015520_np12.6/A. integerrimus|evm.model.ctg029050_np12.204/A. integerrimus|evm.model.ctg018280_np12.28/A. integerrimus|evm.model.ctg029050_np12.193/A. integerrimus|evm.model.ctg019620_np12.254/A. integerrimus|evm.model.ctg019620_np12.252/A. integerrimus|evm.model.ctg019620_np12.263/A. integerrimus|evm.model.ctg017440_np12.6/…	24
GO:0032946	GO:0032946	positive regulation of mononuclear cell proliferation	13/494	60/12875	3.30473978740156e-07	4.85532369565037e-06	4.230066927874e-06	A. integerrimus|evm.model.ctg020090_np12.120/A. integerrimus|evm.model.ctg028260_np12.18/A. integerrimus|evm.model.ctg023050_np12.152/A. integerrimus|evm.model.ctg021490_np12.5/A. integerrimus|evm.model.ctg011250_np12.10/A. integerrimus|evm.model.ctg009700_np12.70/A. integerrimus|evm.model.ctg019130_np12.40/A. integerrimus|evm.model.ctg017880_np12.76/A. integerrimus|evm.model.ctg019910_np12.15/A.…	13
GO:0050671	GO:0050671	positive regulation of lymphocyte proliferation	13/494	60/12875	3.30473978740156e-07	4.85532369565037e-06	4.230066927874e-06	A. integerrimus|evm.model.ctg020090_np12.120/A. integerrimus|evm.model.ctg028260_np12.18/A. integerrimus|evm.model.ctg023050_np12.152/A. integerrimus|evm.model.ctg021490_np12.5/A. integerrimus|evm.model.ctg011250_np12.10/A. integerrimus|evm.model.ctg009700_np12.70/A. integerrimus|evm.model.ctg019130_np12.40/A. integerrimus|evm.model.ctg017880_np12.76/A. integerrimus|evm.model.ctg019910_np12.15/A.…	13
GO:0070665	GO:0070665	positive regulation of leukocyte proliferation	13/494	60/12875	3.30473978740156e-07	4.85532369565037e-06	4.230066927874e-06	A. integerrimus|evm.model.ctg020090_np12.120/A. integerrimus|evm.model.ctg028260_np12.18/A. integerrimus|evm.model.ctg023050_np12.152/A. integerrimus|evm.model.ctg021490_np12.5/A. integerrimus|evm.model.ctg011250_np12.10/A. integerrimus|evm.model.ctg009700_np12.70/A. integerrimus|evm.model.ctg019130_np12.40/A. integerrimus|evm.model.ctg017880_np12.76/A. integerrimus|evm.model.ctg019910_np12.15/A.…	13
GO:0033273	GO:0033273	response to vitamin	17/494	103/12875	3.48859188014584e-07	5.10501911385485e-06	4.44760717787517e-06	A. integerrimus|evm.model.ctg007360_np12.220/A. integerrimus|evm.model.ctg014950_np12.35/A. integerrimus|evm.model.ctg016670_np12.1/A. integerrimus|evm.model.ctg004810_np12.285/A. integerrimus|evm.model.ctg005450_np12.1/A. integerrimus|evm.model.ctg028260_np12.18/A. integerrimus|evm.model.ctg023050_np12.152/A. integerrimus|evm.model.ctg021490_np12.5/A. integerrimus|evm.model.ctg011250_np12.10/A. …	17
GO:0006195	GO:0006195	purine nucleotide catabolic process	12/494	51/12875	3.61225880206361e-07	5.26501054761097e-06	4.58699530420776e-06	A. integerrimus|evm.model.ctg028260_np12.18/A. integerrimus|evm.model.ctg023050_np12.152/A. integerrimus|evm.model.ctg021490_np12.5/A. integerrimus|evm.model.ctg011250_np12.10/A. integerrimus|evm.model.ctg009700_np12.70/A. integerrimus|evm.model.ctg019130_np12.40/A. integerrimus|evm.model.ctg017880_np12.76/A. integerrimus|evm.model.ctg019910_np12.15/A. integerrimus|evm.model.ctg021870_np12.37/A. …	12
GO:0071549	GO:0071549	cellular response to dexamethasone stimulus	15/494	81/12875	3.67135435440414e-07	5.32974792782639e-06	4.64339596216838e-06	A. integerrimus|evm.model.ctg015520_np12.6/A. integerrimus|evm.model.ctg029050_np12.204/A. integerrimus|evm.model.ctg018280_np12.28/A. integerrimus|evm.model.ctg029050_np12.193/A. integerrimus|evm.model.ctg019620_np12.254/A. integerrimus|evm.model.ctg019620_np12.252/A. integerrimus|evm.model.ctg019620_np12.263/A. integerrimus|evm.model.ctg017440_np12.6/A. integerrimus|evm.model.ctg015860_np12.1/A…	15
GO:0015850	GO:0015850	organic hydroxy compound transport	24/494	193/12875	3.68569554497115e-07	5.32974792782639e-06	4.64339596216838e-06	A. integerrimus|evm.model.ctg011570_np12.114/A. integerrimus|evm.model.ctg014310_np12.80/A. integerrimus|evm.model.ctg009980_np12.186/A. integerrimus|evm.model.ctg023400_np12.16/A. integerrimus|evm.model.ctg006080_np12.22/A. integerrimus|evm.model.ctg015520_np12.6/A. integerrimus|evm.model.ctg029050_np12.204/A. integerrimus|evm.model.ctg018280_np12.28/A. integerrimus|evm.model.ctg029050_np12.193/…	24
GO:0016074	GO:0016074	sno(s)RNA metabolic process	8/494	20/12875	3.72135906577641e-07	5.36021641121441e-06	4.6699407884253e-06	A. integerrimus|evm.model.ctg023320_np12.228/A. integerrimus|evm.model.ctg025540_np12.36/A. integerrimus|evm.model.ctg008930_np12.180/A. integerrimus|evm.model.ctg018670_np12.19/A. integerrimus|evm.model.ctg025420_np12.102/A. integerrimus|evm.model.ctg018680_np12.33/A. integerrimus|evm.model.ctg004400_np12.33/A. integerrimus|evm.model.ctg000370_np12.285	8
GO:0071219	GO:0071219	cellular response to molecule of bacterial origin	19/494	128/12875	3.99963308562035e-07	5.73853606386076e-06	4.99954135702543e-06	A. integerrimus|evm.model.ctg015520_np12.6/A. integerrimus|evm.model.ctg029050_np12.204/A. integerrimus|evm.model.ctg018280_np12.28/A. integerrimus|evm.model.ctg029050_np12.193/A. integerrimus|evm.model.ctg019620_np12.254/A. integerrimus|evm.model.ctg019620_np12.252/A. integerrimus|evm.model.ctg019620_np12.263/A. integerrimus|evm.model.ctg017440_np12.6/A. integerrimus|evm.model.ctg015860_np12.1/A…	19
GO:0009262	GO:0009262	deoxyribonucleotide metabolic process	12/494	52/12875	4.53453247776681e-07	6.45555728327035e-06	5.6242263290131e-06	A. integerrimus|evm.model.ctg028260_np12.18/A. integerrimus|evm.model.ctg023050_np12.152/A. integerrimus|evm.model.ctg021490_np12.5/A. integerrimus|evm.model.ctg011250_np12.10/A. integerrimus|evm.model.ctg009700_np12.70/A. integerrimus|evm.model.ctg019130_np12.40/A. integerrimus|evm.model.ctg017880_np12.76/A. integerrimus|evm.model.ctg019910_np12.15/A. integerrimus|evm.model.ctg021870_np12.37/A. …	12
GO:2000106	GO:2000106	regulation of leukocyte apoptotic process	12/494	52/12875	4.53453247776681e-07	6.45555728327035e-06	5.6242263290131e-06	A. integerrimus|evm.model.ctg028260_np12.18/A. integerrimus|evm.model.ctg023050_np12.152/A. integerrimus|evm.model.ctg021490_np12.5/A. integerrimus|evm.model.ctg011250_np12.10/A. integerrimus|evm.model.ctg009700_np12.70/A. integerrimus|evm.model.ctg019130_np12.40/A. integerrimus|evm.model.ctg017880_np12.76/A. integerrimus|evm.model.ctg019910_np12.15/A. integerrimus|evm.model.ctg021870_np12.37/A. …	12
GO:0042737	GO:0042737	GO:0042737	22/494	168/12875	4.62018020356693e-07	6.55209339293487e-06	5.70833075344176e-06	A. integerrimus|evm.model.ctg009980_np12.186/A. integerrimus|evm.model.ctg008510_np12.84/A. integerrimus|evm.model.ctg000220_np12.9/A. integerrimus|evm.model.ctg026990_np12.18/A. integerrimus|evm.model.ctg014950_np12.35/A. integerrimus|evm.model.ctg016670_np12.1/A. integerrimus|evm.model.ctg024750_np12.4/A. integerrimus|evm.model.ctg004810_np12.285/A. integerrimus|evm.model.ctg026100_np12.128/A. …	22
GO:0031126	GO:0031126	sno(s)RNA 3'-end processing	7/494	15/12875	5.77790572373774e-07	8.16240297049567e-06	7.11126858306184e-06	A. integerrimus|evm.model.ctg023320_np12.228/A. integerrimus|evm.model.ctg025540_np12.36/A. integerrimus|evm.model.ctg008930_np12.180/A. integerrimus|evm.model.ctg018670_np12.19/A. integerrimus|evm.model.ctg025420_np12.102/A. integerrimus|evm.model.ctg018680_np12.33/A. integerrimus|evm.model.ctg004400_np12.33	7
GO:0015718	GO:0015718	monocarboxylic acid transport	21/494	157/12875	5.90227932951255e-07	8.30615784570865e-06	7.23651105534106e-06	A. integerrimus|evm.model.ctg024520_np12.507/A. integerrimus|evm.model.ctg015520_np12.6/A. integerrimus|evm.model.ctg029050_np12.204/A. integerrimus|evm.model.ctg018280_np12.28/A. integerrimus|evm.model.ctg029050_np12.193/A. integerrimus|evm.model.ctg019620_np12.254/A. integerrimus|evm.model.ctg019620_np12.252/A. integerrimus|evm.model.ctg019620_np12.263/A. integerrimus|evm.model.ctg017440_np12.6…	21
GO:0005234	GO:0005234	extracellularly glutamate-gated ion channel activity	24/494	199/12875	6.49954599435208e-07	9.11176810582259e-06	7.93837678699491e-06	A. integerrimus|evm.model.ctg025520_np12.7/A. integerrimus|evm.model.ctg017650_np12.12/A. integerrimus|evm.model.ctg015770_np12.48/A. integerrimus|evm.model.ctg015790_np12.9/A. integerrimus|evm.model.ctg017670_np12.79/A. integerrimus|evm.model.ctg014880_np12.42/A. integerrimus|evm.model.ctg012160_np12.5/A. integerrimus|evm.model.ctg007510_np12.11/A. integerrimus|evm.model.ctg007670_np12.238/A. in…	24
GO:0002824	GO:0002824	positive regulation of adaptive immune response based on somatic recombination of immune receptors built from immunoglobulin superfamily domains	12/494	54/12875	7.0274583138126e-07	9.7037046566292e-06	8.454085189549e-06	A. integerrimus|evm.model.ctg028260_np12.18/A. integerrimus|evm.model.ctg023050_np12.152/A. integerrimus|evm.model.ctg021490_np12.5/A. integerrimus|evm.model.ctg011250_np12.10/A. integerrimus|evm.model.ctg009700_np12.70/A. integerrimus|evm.model.ctg019130_np12.40/A. integerrimus|evm.model.ctg017880_np12.76/A. integerrimus|evm.model.ctg019910_np12.15/A. integerrimus|evm.model.ctg021870_np12.37/A. …	12
GO:0009163	GO:0009163	nucleoside biosynthetic process	12/494	54/12875	7.0274583138126e-07	9.7037046566292e-06	8.454085189549e-06	A. integerrimus|evm.model.ctg028260_np12.18/A. integerrimus|evm.model.ctg023050_np12.152/A. integerrimus|evm.model.ctg021490_np12.5/A. integerrimus|evm.model.ctg011250_np12.10/A. integerrimus|evm.model.ctg009700_np12.70/A. integerrimus|evm.model.ctg019130_np12.40/A. integerrimus|evm.model.ctg017880_np12.76/A. integerrimus|evm.model.ctg019910_np12.15/A. integerrimus|evm.model.ctg021870_np12.37/A. …	12
GO:0045582	GO:0045582	positive regulation of T cell differentiation	12/494	54/12875	7.0274583138126e-07	9.7037046566292e-06	8.454085189549e-06	A. integerrimus|evm.model.ctg028260_np12.18/A. integerrimus|evm.model.ctg023050_np12.152/A. integerrimus|evm.model.ctg021490_np12.5/A. integerrimus|evm.model.ctg011250_np12.10/A. integerrimus|evm.model.ctg009700_np12.70/A. integerrimus|evm.model.ctg019130_np12.40/A. integerrimus|evm.model.ctg017880_np12.76/A. integerrimus|evm.model.ctg019910_np12.15/A. integerrimus|evm.model.ctg021870_np12.37/A. …	12
GO:1901658	GO:1901658	glycosyl compound catabolic process	12/494	54/12875	7.0274583138126e-07	9.7037046566292e-06	8.454085189549e-06	A. integerrimus|evm.model.ctg028260_np12.18/A. integerrimus|evm.model.ctg023050_np12.152/A. integerrimus|evm.model.ctg021490_np12.5/A. integerrimus|evm.model.ctg011250_np12.10/A. integerrimus|evm.model.ctg009700_np12.70/A. integerrimus|evm.model.ctg019130_np12.40/A. integerrimus|evm.model.ctg017880_np12.76/A. integerrimus|evm.model.ctg019910_np12.15/A. integerrimus|evm.model.ctg021870_np12.37/A. …	12
GO:1903524	GO:1903524	positive regulation of blood circulation	13/494	64/12875	7.30146103392076e-07	1.00442945234423e-05	8.75081472230203e-06	A. integerrimus|evm.model.ctg028260_np12.18/A. integerrimus|evm.model.ctg023050_np12.152/A. integerrimus|evm.model.ctg021490_np12.5/A. integerrimus|evm.model.ctg011250_np12.10/A. integerrimus|evm.model.ctg009700_np12.70/A. integerrimus|evm.model.ctg019130_np12.40/A. integerrimus|evm.model.ctg017880_np12.76/A. integerrimus|evm.model.ctg019910_np12.15/A. integerrimus|evm.model.ctg021870_np12.37/A. …	13
GO:0006869	GO:0006869	lipid transport	29/494	275/12875	7.89702189433965e-07	1.08230453051901e-05	9.42927987383839e-06	A. integerrimus|evm.model.ctg015520_np12.6/A. integerrimus|evm.model.ctg029050_np12.204/A. integerrimus|evm.model.ctg018280_np12.28/A. integerrimus|evm.model.ctg029050_np12.193/A. integerrimus|evm.model.ctg019620_np12.254/A. integerrimus|evm.model.ctg019620_np12.252/A. integerrimus|evm.model.ctg019620_np12.263/A. integerrimus|evm.model.ctg017440_np12.6/A. integerrimus|evm.model.ctg015860_np12.1/A…	29
GO:0043144	GO:0043144	sno(s)RNA processing	7/494	16/12875	9.93300452119453e-07	1.35627976231775e-05	1.18162135568113e-05	A. integerrimus|evm.model.ctg023320_np12.228/A. integerrimus|evm.model.ctg025540_np12.36/A. integerrimus|evm.model.ctg008930_np12.180/A. integerrimus|evm.model.ctg018670_np12.19/A. integerrimus|evm.model.ctg025420_np12.102/A. integerrimus|evm.model.ctg018680_np12.33/A. integerrimus|evm.model.ctg004400_np12.33	7
GO:0046634	GO:0046634	regulation of alpha-beta T cell activation	12/494	56/12875	1.06676517033686e-06	1.45119572986937e-05	1.2643142759548e-05	A. integerrimus|evm.model.ctg028260_np12.18/A. integerrimus|evm.model.ctg023050_np12.152/A. integerrimus|evm.model.ctg021490_np12.5/A. integerrimus|evm.model.ctg011250_np12.10/A. integerrimus|evm.model.ctg009700_np12.70/A. integerrimus|evm.model.ctg019130_np12.40/A. integerrimus|evm.model.ctg017880_np12.76/A. integerrimus|evm.model.ctg019910_np12.15/A. integerrimus|evm.model.ctg021870_np12.37/A. …	12
GO:0046128	GO:0046128	purine ribonucleoside metabolic process	14/494	77/12875	1.13610200760181e-06	1.53981648484186e-05	1.34152266580288e-05	A. integerrimus|evm.model.ctg015580_np12.262/A. integerrimus|evm.model.ctg020530_np12.109/A. integerrimus|evm.model.ctg028260_np12.18/A. integerrimus|evm.model.ctg023050_np12.152/A. integerrimus|evm.model.ctg021490_np12.5/A. integerrimus|evm.model.ctg011250_np12.10/A. integerrimus|evm.model.ctg009700_np12.70/A. integerrimus|evm.model.ctg019130_np12.40/A. integerrimus|evm.model.ctg017880_np12.76/A…	14
GO:0004003	GO:0004003	GO:0004003	11/494	47/12875	1.18086847097581e-06	1.59460657863756e-05	1.38925702467743e-05	A. integerrimus|evm.model.ctg028720_np12.105/A. integerrimus|evm.model.ctg013310_np12.178/A. integerrimus|evm.model.ctg019020_np12.583/A. integerrimus|evm.model.ctg018390_np12.28/A. integerrimus|evm.model.ctg028310_np12.4/A. integerrimus|evm.model.ctg012030_np12.40/A. integerrimus|evm.model.ctg015130_np12.20/A. integerrimus|evm.model.ctg005450_np12.1/A. integerrimus|evm.model.ctg024920_np12.173/A…	11
GO:0071356	GO:0071356	cellular response to tumor necrosis factor	17/494	113/12875	1.34688985195405e-06	1.81213422206125e-05	1.57877198763845e-05	A. integerrimus|evm.model.ctg015520_np12.6/A. integerrimus|evm.model.ctg029050_np12.204/A. integerrimus|evm.model.ctg018280_np12.28/A. integerrimus|evm.model.ctg029050_np12.193/A. integerrimus|evm.model.ctg019620_np12.254/A. integerrimus|evm.model.ctg019620_np12.252/A. integerrimus|evm.model.ctg019620_np12.263/A. integerrimus|evm.model.ctg017440_np12.6/A. integerrimus|evm.model.ctg015860_np12.1/A…	17
GO:0005911	GO:0005911	cell-cell junction	41/494	482/12875	1.44507019407016e-06	1.93713241708748e-05	1.68767321935201e-05	A. integerrimus|evm.model.ctg020510_np12.199/A. integerrimus|evm.model.ctg015970_np12.74/A. integerrimus|evm.model.ctg013570_np12.19/A. integerrimus|evm.model.ctg004790_np12.138/A. integerrimus|evm.model.ctg015520_np12.6/A. integerrimus|evm.model.ctg029050_np12.204/A. integerrimus|evm.model.ctg018280_np12.28/A. integerrimus|evm.model.ctg029050_np12.193/A. integerrimus|evm.model.ctg019620_np12.254…	41
GO:0002821	GO:0002821	positive regulation of adaptive immune response	12/494	58/12875	1.58874479933336e-06	2.1219853265278e-05	1.84872122104246e-05	A. integerrimus|evm.model.ctg028260_np12.18/A. integerrimus|evm.model.ctg023050_np12.152/A. integerrimus|evm.model.ctg021490_np12.5/A. integerrimus|evm.model.ctg011250_np12.10/A. integerrimus|evm.model.ctg009700_np12.70/A. integerrimus|evm.model.ctg019130_np12.40/A. integerrimus|evm.model.ctg017880_np12.76/A. integerrimus|evm.model.ctg019910_np12.15/A. integerrimus|evm.model.ctg021870_np12.37/A. …	12
GO:0098739	GO:0098739	import across plasma membrane	16/494	103/12875	1.7818747601987e-06	2.37131376601805e-05	2.06594175095501e-05	A. integerrimus|evm.model.ctg015380_np12.3/A. integerrimus|evm.model.ctg022290_np12.55/A. integerrimus|evm.model.ctg028100_np12.31/A. integerrimus|evm.model.ctg020310_np12.29/A. integerrimus|evm.model.ctg016780_np12.92/A. integerrimus|evm.model.ctg024200_np12.230/A. integerrimus|evm.model.ctg016780_np12.66/A. integerrimus|evm.model.ctg001280_np12.17/A. integerrimus|evm.model.ctg020460_np12.86/A. …	16
GO:0006940	GO:0006940	regulation of smooth muscle contraction	13/494	69/12875	1.80257124233494e-06	2.39019645238131e-05	2.08239277092845e-05	A. integerrimus|evm.model.ctg028260_np12.18/A. integerrimus|evm.model.ctg023050_np12.152/A. integerrimus|evm.model.ctg021490_np12.5/A. integerrimus|evm.model.ctg011250_np12.10/A. integerrimus|evm.model.ctg009700_np12.70/A. integerrimus|evm.model.ctg019130_np12.40/A. integerrimus|evm.model.ctg017880_np12.76/A. integerrimus|evm.model.ctg019910_np12.15/A. integerrimus|evm.model.ctg021870_np12.37/A. …	13
GO:0042278	GO:0042278	purine nucleoside metabolic process	14/494	80/12875	1.83542780752812e-06	2.42500947375928e-05	2.11272265614748e-05	A. integerrimus|evm.model.ctg015580_np12.262/A. integerrimus|evm.model.ctg020530_np12.109/A. integerrimus|evm.model.ctg028260_np12.18/A. integerrimus|evm.model.ctg023050_np12.152/A. integerrimus|evm.model.ctg021490_np12.5/A. integerrimus|evm.model.ctg011250_np12.10/A. integerrimus|evm.model.ctg009700_np12.70/A. integerrimus|evm.model.ctg019130_np12.40/A. integerrimus|evm.model.ctg017880_np12.76/A…	14
GO:0006509	GO:0006509	membrane protein ectodomain proteolysis	8/494	24/12875	1.8966377100536e-06	2.49689975233938e-05	2.17535507963137e-05	A. integerrimus|evm.model.ctg023320_np12.532/A. integerrimus|evm.model.ctg029770_np12.291/A. integerrimus|evm.model.ctg029770_np12.285/A. integerrimus|evm.model.ctg029770_np12.292/A. integerrimus|evm.model.ctg029770_np12.286/A. integerrimus|evm.model.ctg029770_np12.293/A. integerrimus|evm.model.ctg026630_np12.42/A. integerrimus|evm.model.ctg010430_np12.62	8
GO:2000242	GO:2000242	negative regulation of reproductive process	14/494	81/12875	2.14223516885988e-06	2.81015349115084e-05	2.4482687644113e-05	A. integerrimus|evm.model.ctg014310_np12.201/A. integerrimus|evm.model.ctg003490_np12.535/A. integerrimus|evm.model.ctg028260_np12.18/A. integerrimus|evm.model.ctg023050_np12.152/A. integerrimus|evm.model.ctg021490_np12.5/A. integerrimus|evm.model.ctg011250_np12.10/A. integerrimus|evm.model.ctg009700_np12.70/A. integerrimus|evm.model.ctg019130_np12.40/A. integerrimus|evm.model.ctg017880_np12.76/A…	14
GO:0009112	GO:0009112	nucleobase metabolic process	13/494	71/12875	2.52633212875244e-06	3.30221277897071e-05	2.87696185480704e-05	A. integerrimus|evm.model.ctg026100_np12.128/A. integerrimus|evm.model.ctg028260_np12.18/A. integerrimus|evm.model.ctg023050_np12.152/A. integerrimus|evm.model.ctg021490_np12.5/A. integerrimus|evm.model.ctg011250_np12.10/A. integerrimus|evm.model.ctg009700_np12.70/A. integerrimus|evm.model.ctg019130_np12.40/A. integerrimus|evm.model.ctg017880_np12.76/A. integerrimus|evm.model.ctg019910_np12.15/A.…	13
GO:1901659	GO:1901659	glycosyl compound biosynthetic process	12/494	61/12875	2.79482000132626e-06	3.64020349818133e-05	3.17142695185958e-05	A. integerrimus|evm.model.ctg028260_np12.18/A. integerrimus|evm.model.ctg023050_np12.152/A. integerrimus|evm.model.ctg021490_np12.5/A. integerrimus|evm.model.ctg011250_np12.10/A. integerrimus|evm.model.ctg009700_np12.70/A. integerrimus|evm.model.ctg019130_np12.40/A. integerrimus|evm.model.ctg017880_np12.76/A. integerrimus|evm.model.ctg019910_np12.15/A. integerrimus|evm.model.ctg021870_np12.37/A. …	12
GO:0051606	GO:0051606	detection of stimulus	39/494	462/12875	3.16665932480881e-06	4.10994335689851e-05	3.58067485490749e-05	A. integerrimus|evm.model.ctg018440_np12.241/A. integerrimus|evm.model.ctg027350_np12.137/A. integerrimus|evm.model.ctg027350_np12.170/A. integerrimus|evm.model.ctg025520_np12.3/A. integerrimus|evm.model.ctg024540_np12.157/A. integerrimus|evm.model.ctg019070_np12.14/A. integerrimus|evm.model.ctg019070_np12.34/A. integerrimus|evm.model.ctg025520_np12.5/A. integerrimus|evm.model.ctg026500_np12.35/A…	39
GO:0045621	GO:0045621	positive regulation of lymphocyte differentiation	12/494	62/12875	3.34669051344184e-06	4.32830783657461e-05	3.77091888838518e-05	A. integerrimus|evm.model.ctg028260_np12.18/A. integerrimus|evm.model.ctg023050_np12.152/A. integerrimus|evm.model.ctg021490_np12.5/A. integerrimus|evm.model.ctg011250_np12.10/A. integerrimus|evm.model.ctg009700_np12.70/A. integerrimus|evm.model.ctg019130_np12.40/A. integerrimus|evm.model.ctg017880_np12.76/A. integerrimus|evm.model.ctg019910_np12.15/A. integerrimus|evm.model.ctg021870_np12.37/A. …	12
GO:0008277	GO:0008277	regulation of G protein-coupled receptor signaling pathway	16/494	108/12875	3.38440900009207e-06	4.36173131836427e-05	3.80003817554198e-05	A. integerrimus|evm.model.ctg007360_np12.220/A. integerrimus|evm.model.ctg014950_np12.35/A. integerrimus|evm.model.ctg016670_np12.1/A. integerrimus|evm.model.ctg004810_np12.285/A. integerrimus|evm.model.ctg028260_np12.18/A. integerrimus|evm.model.ctg023050_np12.152/A. integerrimus|evm.model.ctg021490_np12.5/A. integerrimus|evm.model.ctg011250_np12.10/A. integerrimus|evm.model.ctg009700_np12.70/A.…	16
GO:0002285	GO:0002285	lymphocyte activation involved in immune response	12/494	63/12875	3.99235392156691e-06	5.10937838115514e-05	4.45140506934289e-05	A. integerrimus|evm.model.ctg028260_np12.18/A. integerrimus|evm.model.ctg023050_np12.152/A. integerrimus|evm.model.ctg021490_np12.5/A. integerrimus|evm.model.ctg011250_np12.10/A. integerrimus|evm.model.ctg009700_np12.70/A. integerrimus|evm.model.ctg019130_np12.40/A. integerrimus|evm.model.ctg017880_np12.76/A. integerrimus|evm.model.ctg019910_np12.15/A. integerrimus|evm.model.ctg021870_np12.37/A. …	12
GO:0048521	GO:0048521	negative regulation of behavior	12/494	63/12875	3.99235392156691e-06	5.10937838115514e-05	4.45140506934289e-05	A. integerrimus|evm.model.ctg028260_np12.18/A. integerrimus|evm.model.ctg023050_np12.152/A. integerrimus|evm.model.ctg021490_np12.5/A. integerrimus|evm.model.ctg011250_np12.10/A. integerrimus|evm.model.ctg009700_np12.70/A. integerrimus|evm.model.ctg019130_np12.40/A. integerrimus|evm.model.ctg017880_np12.76/A. integerrimus|evm.model.ctg019910_np12.15/A. integerrimus|evm.model.ctg021870_np12.37/A. …	12
GO:0050864	GO:0050864	regulation of B cell activation	13/494	74/12875	4.09619680424779e-06	5.22407321597297e-05	4.55132978249755e-05	A. integerrimus|evm.model.ctg020090_np12.120/A. integerrimus|evm.model.ctg028260_np12.18/A. integerrimus|evm.model.ctg023050_np12.152/A. integerrimus|evm.model.ctg021490_np12.5/A. integerrimus|evm.model.ctg011250_np12.10/A. integerrimus|evm.model.ctg009700_np12.70/A. integerrimus|evm.model.ctg019130_np12.40/A. integerrimus|evm.model.ctg017880_np12.76/A. integerrimus|evm.model.ctg019910_np12.15/A.…	13
GO:0010038	GO:0010038	response to metal ion	36/494	415/12875	4.1401288604692e-06	5.26183159325376e-05	4.58422572785517e-05	A. integerrimus|evm.model.ctg021930_np12.128/A. integerrimus|evm.model.ctg018440_np12.504/A. integerrimus|evm.model.ctg030550_np12.192/A. integerrimus|evm.model.ctg005780_np12.111/A. integerrimus|evm.model.ctg013130_np12.25/A. integerrimus|evm.model.ctg024520_np12.507/A. integerrimus|evm.model.ctg003800_np12.6/A. integerrimus|evm.model.ctg009980_np12.186/A. integerrimus|evm.model.ctg005040_np12.8…	36
GO:1904975	GO:1904975	response to bleomycin	6/494	13/12875	4.22092503443684e-06	5.34601987982293e-05	4.65757245179237e-05	A. integerrimus|evm.model.ctg015230_np12.6/A. integerrimus|evm.model.ctg019020_np12.583/A. integerrimus|evm.model.ctg018390_np12.28/A. integerrimus|evm.model.ctg028310_np12.4/A. integerrimus|evm.model.ctg012030_np12.40/A. integerrimus|evm.model.ctg015130_np12.20	6
GO:0043297	GO:0043297	apical junction assembly	18/494	136/12875	4.38583141065503e-06	5.53579339221166e-05	4.82290739316018e-05	A. integerrimus|evm.model.ctg017800_np12.389/A. integerrimus|evm.model.ctg017800_np12.410/A. integerrimus|evm.model.ctg013790_np12.35/A. integerrimus|evm.model.ctg015510_np12.13/A. integerrimus|evm.model.ctg028310_np12.28/A. integerrimus|evm.model.ctg028310_np12.100/A. integerrimus|evm.model.ctg017800_np12.240/A. integerrimus|evm.model.ctg018390_np12.6/A. integerrimus|evm.model.ctg017800_np12.116…	18
GO:0042332	GO:0042332	gravitaxis	12/494	64/12875	4.74517111037647e-06	5.9688402357578e-05	5.20018751822079e-05	A. integerrimus|evm.model.ctg017800_np12.410/A. integerrimus|evm.model.ctg013790_np12.35/A. integerrimus|evm.model.ctg015510_np12.13/A. integerrimus|evm.model.ctg028310_np12.28/A. integerrimus|evm.model.ctg028310_np12.100/A. integerrimus|evm.model.ctg017800_np12.240/A. integerrimus|evm.model.ctg017800_np12.116/A. integerrimus|evm.model.ctg020980_np12.19/A. integerrimus|evm.model.ctg006290_np12.1/…	12
GO:0071044	GO:0071044	histone mRNA catabolic process	7/494	20/12875	5.88673466667307e-06	7.35441375193544e-05	6.40733024944008e-05	A. integerrimus|evm.model.ctg023320_np12.228/A. integerrimus|evm.model.ctg025540_np12.36/A. integerrimus|evm.model.ctg008930_np12.180/A. integerrimus|evm.model.ctg018670_np12.19/A. integerrimus|evm.model.ctg025420_np12.102/A. integerrimus|evm.model.ctg018680_np12.33/A. integerrimus|evm.model.ctg004400_np12.33	7
GO:0071404	GO:0071404	cellular response to low-density lipoprotein particle stimulus	7/494	20/12875	5.88673466667307e-06	7.35441375193544e-05	6.40733024944008e-05	A. integerrimus|evm.model.ctg007360_np12.220/A. integerrimus|evm.model.ctg014950_np12.35/A. integerrimus|evm.model.ctg016670_np12.1/A. integerrimus|evm.model.ctg004810_np12.285/A. integerrimus|evm.model.ctg016450_np12.463/A. integerrimus|evm.model.ctg027360_np12.93/A. integerrimus|evm.model.ctg010910_np12.90	7
GO:0048566	GO:0048566	embryonic digestive tract development	12/494	66/12875	6.63347906846783e-06	8.23134074948728e-05	7.17132872266793e-05	A. integerrimus|evm.model.ctg028260_np12.18/A. integerrimus|evm.model.ctg023050_np12.152/A. integerrimus|evm.model.ctg021490_np12.5/A. integerrimus|evm.model.ctg011250_np12.10/A. integerrimus|evm.model.ctg009700_np12.70/A. integerrimus|evm.model.ctg019130_np12.40/A. integerrimus|evm.model.ctg017880_np12.76/A. integerrimus|evm.model.ctg019910_np12.15/A. integerrimus|evm.model.ctg021870_np12.37/A. …	12
GO:0072523	GO:0072523	purine-containing compound catabolic process	12/494	66/12875	6.63347906846783e-06	8.23134074948728e-05	7.17132872266793e-05	A. integerrimus|evm.model.ctg028260_np12.18/A. integerrimus|evm.model.ctg023050_np12.152/A. integerrimus|evm.model.ctg021490_np12.5/A. integerrimus|evm.model.ctg011250_np12.10/A. integerrimus|evm.model.ctg009700_np12.70/A. integerrimus|evm.model.ctg019130_np12.40/A. integerrimus|evm.model.ctg017880_np12.76/A. integerrimus|evm.model.ctg019910_np12.15/A. integerrimus|evm.model.ctg021870_np12.37/A. …	12
GO:0015103	GO:0015103	inorganic anion transmembrane transporter activity	21/494	183/12875	7.18046877882376e-06	8.8800881564376e-05	7.73653201758789e-05	A. integerrimus|evm.model.ctg011570_np12.114/A. integerrimus|evm.model.ctg016130_np12.42/A. integerrimus|evm.model.ctg015520_np12.6/A. integerrimus|evm.model.ctg029050_np12.204/A. integerrimus|evm.model.ctg018280_np12.28/A. integerrimus|evm.model.ctg029050_np12.193/A. integerrimus|evm.model.ctg019620_np12.254/A. integerrimus|evm.model.ctg019620_np12.252/A. integerrimus|evm.model.ctg019620_np12.26…	21
GO:0070160	GO:0070160	tight junction	18/494	141/12875	7.34872257058393e-06	9.05767047038751e-05	7.89124571337872e-05	A. integerrimus|evm.model.ctg017800_np12.389/A. integerrimus|evm.model.ctg017800_np12.410/A. integerrimus|evm.model.ctg013790_np12.35/A. integerrimus|evm.model.ctg015510_np12.13/A. integerrimus|evm.model.ctg028310_np12.28/A. integerrimus|evm.model.ctg028310_np12.100/A. integerrimus|evm.model.ctg017800_np12.240/A. integerrimus|evm.model.ctg018390_np12.6/A. integerrimus|evm.model.ctg017800_np12.116…	18
GO:0006979	GO:0006979	response to oxidative stress	37/494	444/12875	7.65360841808316e-06	9.3923324693379e-05	8.18281075466411e-05	A. integerrimus|evm.model.ctg028830_np12.44/A. integerrimus|evm.model.ctg018070_np12.243/A. integerrimus|evm.model.ctg015520_np12.6/A. integerrimus|evm.model.ctg029050_np12.204/A. integerrimus|evm.model.ctg018280_np12.28/A. integerrimus|evm.model.ctg029050_np12.193/A. integerrimus|evm.model.ctg019620_np12.254/A. integerrimus|evm.model.ctg019620_np12.252/A. integerrimus|evm.model.ctg019620_np12.26…	37
GO:0034612	GO:0034612	response to tumor necrosis factor	17/494	128/12875	7.69695636610593e-06	9.3923324693379e-05	8.18281075466411e-05	A. integerrimus|evm.model.ctg015520_np12.6/A. integerrimus|evm.model.ctg029050_np12.204/A. integerrimus|evm.model.ctg018280_np12.28/A. integerrimus|evm.model.ctg029050_np12.193/A. integerrimus|evm.model.ctg019620_np12.254/A. integerrimus|evm.model.ctg019620_np12.252/A. integerrimus|evm.model.ctg019620_np12.263/A. integerrimus|evm.model.ctg017440_np12.6/A. integerrimus|evm.model.ctg015860_np12.1/A…	17
GO:0070555	GO:0070555	response to interleukin-1	17/494	128/12875	7.69695636610593e-06	9.3923324693379e-05	8.18281075466411e-05	A. integerrimus|evm.model.ctg015520_np12.6/A. integerrimus|evm.model.ctg029050_np12.204/A. integerrimus|evm.model.ctg018280_np12.28/A. integerrimus|evm.model.ctg029050_np12.193/A. integerrimus|evm.model.ctg019620_np12.254/A. integerrimus|evm.model.ctg019620_np12.252/A. integerrimus|evm.model.ctg019620_np12.263/A. integerrimus|evm.model.ctg017440_np12.6/A. integerrimus|evm.model.ctg015860_np12.1/A…	17
GO:0055094	GO:0055094	response to lipoprotein particle	7/494	21/12875	8.53957626390605e-06	0.00010351770170735	9.0186944041252e-05	A. integerrimus|evm.model.ctg007360_np12.220/A. integerrimus|evm.model.ctg014950_np12.35/A. integerrimus|evm.model.ctg016670_np12.1/A. integerrimus|evm.model.ctg004810_np12.285/A. integerrimus|evm.model.ctg016450_np12.463/A. integerrimus|evm.model.ctg027360_np12.93/A. integerrimus|evm.model.ctg010910_np12.90	7
GO:0070566	GO:0070566	adenylyltransferase activity	7/494	21/12875	8.53957626390605e-06	0.00010351770170735	9.0186944041252e-05	A. integerrimus|evm.model.ctg023320_np12.228/A. integerrimus|evm.model.ctg025540_np12.36/A. integerrimus|evm.model.ctg008930_np12.180/A. integerrimus|evm.model.ctg018670_np12.19/A. integerrimus|evm.model.ctg025420_np12.102/A. integerrimus|evm.model.ctg018680_np12.33/A. integerrimus|evm.model.ctg004400_np12.33	7
GO:0010226	GO:0010226	response to lithium ion	11/494	57/12875	8.83928173230384e-06	0.000106798295403789	9.30450708663562e-05	A. integerrimus|evm.model.ctg021930_np12.128/A. integerrimus|evm.model.ctg018440_np12.504/A. integerrimus|evm.model.ctg030550_np12.192/A. integerrimus|evm.model.ctg005780_np12.111/A. integerrimus|evm.model.ctg013130_np12.25/A. integerrimus|evm.model.ctg003800_np12.6/A. integerrimus|evm.model.ctg005040_np12.86/A. integerrimus|evm.model.ctg003940_np12.187/A. integerrimus|evm.model.ctg014950_np12.35…	11
GO:0140097	GO:0140097	catalytic activity, acting on DNA	21/494	186/12875	9.26306041847228e-06	0.000111551543990324	9.71862076692174e-05	A. integerrimus|evm.model.ctg014310_np12.201/A. integerrimus|evm.model.ctg023320_np12.228/A. integerrimus|evm.model.ctg025540_np12.36/A. integerrimus|evm.model.ctg008930_np12.180/A. integerrimus|evm.model.ctg018670_np12.19/A. integerrimus|evm.model.ctg025420_np12.102/A. integerrimus|evm.model.ctg018680_np12.33/A. integerrimus|evm.model.ctg004400_np12.33/A. integerrimus|evm.model.ctg028560_np12.30…	21
GO:0005903	GO:0005903	brush border	20/494	173/12875	1.05872308489208e-05	0.000127081368980673	0.000110716139596557	A. integerrimus|evm.model.ctg017330_np12.76/A. integerrimus|evm.model.ctg019260_np12.157/A. integerrimus|evm.model.ctg002360_np12.42/A. integerrimus|evm.model.ctg018040_np12.257/A. integerrimus|evm.model.ctg015520_np12.6/A. integerrimus|evm.model.ctg029050_np12.204/A. integerrimus|evm.model.ctg018280_np12.28/A. integerrimus|evm.model.ctg029050_np12.193/A. integerrimus|evm.model.ctg019620_np12.254…	20
GO:0003014	GO:0003014	renal system process	19/494	159/12875	1.08904699629766e-05	0.000130295427276916	0.000113516299288356	A. integerrimus|evm.model.ctg016130_np12.42/A. integerrimus|evm.model.ctg028830_np12.44/A. integerrimus|evm.model.ctg004790_np12.138/A. integerrimus|evm.model.ctg015520_np12.6/A. integerrimus|evm.model.ctg029050_np12.204/A. integerrimus|evm.model.ctg018280_np12.28/A. integerrimus|evm.model.ctg029050_np12.193/A. integerrimus|evm.model.ctg019620_np12.254/A. integerrimus|evm.model.ctg019620_np12.252…	19
GO:0030183	GO:0030183	B cell differentiation	13/494	81/12875	1.14983588585561e-05	0.000137121662621677	0.000119463468660323	A. integerrimus|evm.model.ctg007360_np12.220/A. integerrimus|evm.model.ctg028260_np12.18/A. integerrimus|evm.model.ctg023050_np12.152/A. integerrimus|evm.model.ctg021490_np12.5/A. integerrimus|evm.model.ctg011250_np12.10/A. integerrimus|evm.model.ctg009700_np12.70/A. integerrimus|evm.model.ctg019130_np12.40/A. integerrimus|evm.model.ctg017880_np12.76/A. integerrimus|evm.model.ctg019910_np12.15/A.…	13
GO:0015698	GO:0015698	inorganic anion transport	21/494	189/12875	1.18769497198988e-05	0.000141178111071807	0.000122997537552351	A. integerrimus|evm.model.ctg011570_np12.114/A. integerrimus|evm.model.ctg016130_np12.42/A. integerrimus|evm.model.ctg015520_np12.6/A. integerrimus|evm.model.ctg029050_np12.204/A. integerrimus|evm.model.ctg018280_np12.28/A. integerrimus|evm.model.ctg029050_np12.193/A. integerrimus|evm.model.ctg019620_np12.254/A. integerrimus|evm.model.ctg019620_np12.252/A. integerrimus|evm.model.ctg019620_np12.26…	21
GO:0003678	GO:0003678	DNA helicase activity	11/494	59/12875	1.25094077548902e-05	0.000148216305431328	0.00012912937037306	A. integerrimus|evm.model.ctg028720_np12.105/A. integerrimus|evm.model.ctg013310_np12.178/A. integerrimus|evm.model.ctg019020_np12.583/A. integerrimus|evm.model.ctg018390_np12.28/A. integerrimus|evm.model.ctg028310_np12.4/A. integerrimus|evm.model.ctg012030_np12.40/A. integerrimus|evm.model.ctg015130_np12.20/A. integerrimus|evm.model.ctg005450_np12.1/A. integerrimus|evm.model.ctg024920_np12.173/A…	11
GO:0009119	GO:0009119	ribonucleoside metabolic process	14/494	95/12875	1.46827487149839e-05	0.000173407511350919	0.000151076514109159	A. integerrimus|evm.model.ctg015580_np12.262/A. integerrimus|evm.model.ctg020530_np12.109/A. integerrimus|evm.model.ctg028260_np12.18/A. integerrimus|evm.model.ctg023050_np12.152/A. integerrimus|evm.model.ctg021490_np12.5/A. integerrimus|evm.model.ctg011250_np12.10/A. integerrimus|evm.model.ctg009700_np12.70/A. integerrimus|evm.model.ctg019130_np12.40/A. integerrimus|evm.model.ctg017880_np12.76/A…	14
GO:0007565	GO:0007565	female pregnancy	20/494	177/12875	1.49012930200231e-05	0.000175424516867131	0.000152833774564339	A. integerrimus|evm.model.ctg015520_np12.6/A. integerrimus|evm.model.ctg029050_np12.204/A. integerrimus|evm.model.ctg018280_np12.28/A. integerrimus|evm.model.ctg029050_np12.193/A. integerrimus|evm.model.ctg019620_np12.254/A. integerrimus|evm.model.ctg019620_np12.252/A. integerrimus|evm.model.ctg019620_np12.263/A. integerrimus|evm.model.ctg017440_np12.6/A. integerrimus|evm.model.ctg015860_np12.1/A…	20
GO:0005231	GO:0005231	excitatory extracellular ligand-gated monoatomic ion channel activity	24/494	238/12875	1.51338915362976e-05	0.000177593557868439	0.000154723491744896	A. integerrimus|evm.model.ctg025520_np12.7/A. integerrimus|evm.model.ctg017650_np12.12/A. integerrimus|evm.model.ctg015770_np12.48/A. integerrimus|evm.model.ctg015790_np12.9/A. integerrimus|evm.model.ctg017670_np12.79/A. integerrimus|evm.model.ctg014880_np12.42/A. integerrimus|evm.model.ctg012160_np12.5/A. integerrimus|evm.model.ctg007510_np12.11/A. integerrimus|evm.model.ctg007670_np12.238/A. in…	24
GO:0071029	GO:0071029	nuclear ncRNA surveillance	5/494	10/12875	1.75015110069053e-05	0.000204073174375756	0.000177793127689197	A. integerrimus|evm.model.ctg023320_np12.228/A. integerrimus|evm.model.ctg025540_np12.36/A. integerrimus|evm.model.ctg018670_np12.19/A. integerrimus|evm.model.ctg025420_np12.102/A. integerrimus|evm.model.ctg018680_np12.33	5
GO:0071046	GO:0071046	nuclear polyadenylation-dependent ncRNA catabolic process	5/494	10/12875	1.75015110069053e-05	0.000204073174375756	0.000177793127689197	A. integerrimus|evm.model.ctg023320_np12.228/A. integerrimus|evm.model.ctg025540_np12.36/A. integerrimus|evm.model.ctg018670_np12.19/A. integerrimus|evm.model.ctg025420_np12.102/A. integerrimus|evm.model.ctg018680_np12.33	5
GO:0007043	GO:0007043	cell-cell junction assembly	20/494	181/12875	2.07353295186938e-05	0.000241015396589122	0.000209978020442469	A. integerrimus|evm.model.ctg004790_np12.138/A. integerrimus|evm.model.ctg017800_np12.389/A. integerrimus|evm.model.ctg017800_np12.410/A. integerrimus|evm.model.ctg013790_np12.35/A. integerrimus|evm.model.ctg015510_np12.13/A. integerrimus|evm.model.ctg028310_np12.28/A. integerrimus|evm.model.ctg028310_np12.100/A. integerrimus|evm.model.ctg017800_np12.240/A. integerrimus|evm.model.ctg018390_np12.6…	20
GO:0071402	GO:0071402	cellular response to lipoprotein particle stimulus	7/494	24/12875	2.29930387431332e-05	0.00026641460979031	0.000232106384788727	A. integerrimus|evm.model.ctg007360_np12.220/A. integerrimus|evm.model.ctg014950_np12.35/A. integerrimus|evm.model.ctg016670_np12.1/A. integerrimus|evm.model.ctg004810_np12.285/A. integerrimus|evm.model.ctg016450_np12.463/A. integerrimus|evm.model.ctg027360_np12.93/A. integerrimus|evm.model.ctg010910_np12.90	7
GO:0009629	GO:0009629	response to gravity	12/494	76/12875	2.95050410244593e-05	0.000340792502147292	0.000296906073202106	A. integerrimus|evm.model.ctg017800_np12.410/A. integerrimus|evm.model.ctg013790_np12.35/A. integerrimus|evm.model.ctg015510_np12.13/A. integerrimus|evm.model.ctg028310_np12.28/A. integerrimus|evm.model.ctg028310_np12.100/A. integerrimus|evm.model.ctg017800_np12.240/A. integerrimus|evm.model.ctg017800_np12.116/A. integerrimus|evm.model.ctg020980_np12.19/A. integerrimus|evm.model.ctg006290_np12.1/…	12
GO:0005329	GO:0005329	GO:0005329	5/494	11/12875	3.10746428398019e-05	0.000356678634845601	0.000310746428398019	A. integerrimus|evm.model.ctg011570_np12.114/A. integerrimus|evm.model.ctg014310_np12.80/A. integerrimus|evm.model.ctg009980_np12.186/A. integerrimus|evm.model.ctg023400_np12.16/A. integerrimus|evm.model.ctg006080_np12.22	5
GO:1990700	GO:1990700	nucleolar chromatin organization	5/494	11/12875	3.10746428398019e-05	0.000356678634845601	0.000310746428398019	A. integerrimus|evm.model.ctg019020_np12.583/A. integerrimus|evm.model.ctg018390_np12.28/A. integerrimus|evm.model.ctg028310_np12.4/A. integerrimus|evm.model.ctg012030_np12.40/A. integerrimus|evm.model.ctg015130_np12.20	5
GO:0032508	GO:0032508	DNA duplex unwinding	11/494	65/12875	3.24984390269173e-05	0.00037185908581267	0.000323971977838427	A. integerrimus|evm.model.ctg028720_np12.105/A. integerrimus|evm.model.ctg013310_np12.178/A. integerrimus|evm.model.ctg019020_np12.583/A. integerrimus|evm.model.ctg018390_np12.28/A. integerrimus|evm.model.ctg028310_np12.4/A. integerrimus|evm.model.ctg012030_np12.40/A. integerrimus|evm.model.ctg015130_np12.20/A. integerrimus|evm.model.ctg005450_np12.1/A. integerrimus|evm.model.ctg024920_np12.173/A…	11
GO:0044806	GO:0044806	G-quadruplex DNA unwinding	6/494	18/12875	3.87468916614711e-05	0.00044197929525647	0.000385062277381079	A. integerrimus|evm.model.ctg019020_np12.583/A. integerrimus|evm.model.ctg018390_np12.28/A. integerrimus|evm.model.ctg028310_np12.4/A. integerrimus|evm.model.ctg012030_np12.40/A. integerrimus|evm.model.ctg015130_np12.20/A. integerrimus|evm.model.ctg024920_np12.173	6
GO:0010876	GO:0010876	lipid localization	30/494	353/12875	3.89725956429318e-05	0.000443177534973648	0.000386106210703968	A. integerrimus|evm.model.ctg015520_np12.6/A. integerrimus|evm.model.ctg029050_np12.204/A. integerrimus|evm.model.ctg018280_np12.28/A. integerrimus|evm.model.ctg029050_np12.193/A. integerrimus|evm.model.ctg019620_np12.254/A. integerrimus|evm.model.ctg019620_np12.252/A. integerrimus|evm.model.ctg019620_np12.263/A. integerrimus|evm.model.ctg017440_np12.6/A. integerrimus|evm.model.ctg015860_np12.1/A…	30
GO:0002685	GO:0002685	regulation of leukocyte migration	13/494	91/12875	4.1400942103043e-05	0.000469338457853324	0.000408898193610301	A. integerrimus|evm.model.ctg007360_np12.220/A. integerrimus|evm.model.ctg028260_np12.18/A. integerrimus|evm.model.ctg023050_np12.152/A. integerrimus|evm.model.ctg021490_np12.5/A. integerrimus|evm.model.ctg011250_np12.10/A. integerrimus|evm.model.ctg009700_np12.70/A. integerrimus|evm.model.ctg019130_np12.40/A. integerrimus|evm.model.ctg017880_np12.76/A. integerrimus|evm.model.ctg019910_np12.15/A.…	13
GO:0002822	GO:0002822	regulation of adaptive immune response based on somatic recombination of immune receptors built from immunoglobulin superfamily domains	12/494	79/12875	4.38785580747115e-05	0.0004958952117182	0.000432035033351005	A. integerrimus|evm.model.ctg028260_np12.18/A. integerrimus|evm.model.ctg023050_np12.152/A. integerrimus|evm.model.ctg021490_np12.5/A. integerrimus|evm.model.ctg011250_np12.10/A. integerrimus|evm.model.ctg009700_np12.70/A. integerrimus|evm.model.ctg019130_np12.40/A. integerrimus|evm.model.ctg017880_np12.76/A. integerrimus|evm.model.ctg019910_np12.15/A. integerrimus|evm.model.ctg021870_np12.37/A. …	12
GO:1901657	GO:1901657	glycosyl compound metabolic process	17/494	147/12875	4.80035600416772e-05	0.000540849926481842	0.000471200589366157	A. integerrimus|evm.model.ctg015580_np12.262/A. integerrimus|evm.model.ctg014950_np12.35/A. integerrimus|evm.model.ctg016670_np12.1/A. integerrimus|evm.model.ctg004810_np12.285/A. integerrimus|evm.model.ctg020530_np12.109/A. integerrimus|evm.model.ctg028260_np12.18/A. integerrimus|evm.model.ctg023050_np12.152/A. integerrimus|evm.model.ctg021490_np12.5/A. integerrimus|evm.model.ctg011250_np12.10/A…	17
GO:0032392	GO:0032392	DNA geometric change	11/494	68/12875	5.01743350694195e-05	0.000563578999113082	0.000491002667346001	A. integerrimus|evm.model.ctg028720_np12.105/A. integerrimus|evm.model.ctg013310_np12.178/A. integerrimus|evm.model.ctg019020_np12.583/A. integerrimus|evm.model.ctg018390_np12.28/A. integerrimus|evm.model.ctg028310_np12.4/A. integerrimus|evm.model.ctg012030_np12.40/A. integerrimus|evm.model.ctg015130_np12.20/A. integerrimus|evm.model.ctg005450_np12.1/A. integerrimus|evm.model.ctg024920_np12.173/A…	11
GO:0045142	GO:0045142	triplex DNA binding	5/494	12/12875	5.15930615803962e-05	0.000575991839467463	0.000501817012332121	A. integerrimus|evm.model.ctg019020_np12.583/A. integerrimus|evm.model.ctg018390_np12.28/A. integerrimus|evm.model.ctg028310_np12.4/A. integerrimus|evm.model.ctg012030_np12.40/A. integerrimus|evm.model.ctg015130_np12.20	5
GO:1904976	GO:1904976	cellular response to bleomycin	5/494	12/12875	5.15930615803962e-05	0.000575991839467463	0.000501817012332121	A. integerrimus|evm.model.ctg019020_np12.583/A. integerrimus|evm.model.ctg018390_np12.28/A. integerrimus|evm.model.ctg028310_np12.4/A. integerrimus|evm.model.ctg012030_np12.40/A. integerrimus|evm.model.ctg015130_np12.20	5
GO:0045187	GO:0045187	regulation of circadian sleep/wake cycle, sleep	12/494	81/12875	5.65288887426735e-05	0.000628179654603144	0.000547284207658607	A. integerrimus|evm.model.ctg028260_np12.18/A. integerrimus|evm.model.ctg023050_np12.152/A. integerrimus|evm.model.ctg021490_np12.5/A. integerrimus|evm.model.ctg011250_np12.10/A. integerrimus|evm.model.ctg009700_np12.70/A. integerrimus|evm.model.ctg019130_np12.40/A. integerrimus|evm.model.ctg017880_np12.76/A. integerrimus|evm.model.ctg019910_np12.15/A. integerrimus|evm.model.ctg021870_np12.37/A. …	12
GO:0060079	GO:0060079	excitatory postsynaptic potential	24/494	258/12875	5.66097102296871e-05	0.000628179654603144	0.000547284207658607	A. integerrimus|evm.model.ctg025520_np12.7/A. integerrimus|evm.model.ctg017650_np12.12/A. integerrimus|evm.model.ctg015770_np12.48/A. integerrimus|evm.model.ctg015790_np12.9/A. integerrimus|evm.model.ctg017670_np12.79/A. integerrimus|evm.model.ctg014880_np12.42/A. integerrimus|evm.model.ctg012160_np12.5/A. integerrimus|evm.model.ctg007510_np12.11/A. integerrimus|evm.model.ctg007670_np12.238/A. in…	24
GO:0000041	GO:0000041	transition metal ion transport	15/494	121/12875	5.9455835672234e-05	0.000657774953084686	0.000573068295635991	A. integerrimus|evm.model.ctg016730_np12.22/A. integerrimus|evm.model.ctg015520_np12.6/A. integerrimus|evm.model.ctg029050_np12.204/A. integerrimus|evm.model.ctg018280_np12.28/A. integerrimus|evm.model.ctg029050_np12.193/A. integerrimus|evm.model.ctg019620_np12.254/A. integerrimus|evm.model.ctg019620_np12.252/A. integerrimus|evm.model.ctg019620_np12.263/A. integerrimus|evm.model.ctg017440_np12.6/…	15
GO:0001824	GO:0001824	blastocyst development	12/494	82/12875	6.39575836746721e-05	0.000705454068579792	0.00061460741068754	A. integerrimus|evm.model.ctg028260_np12.18/A. integerrimus|evm.model.ctg023050_np12.152/A. integerrimus|evm.model.ctg021490_np12.5/A. integerrimus|evm.model.ctg011250_np12.10/A. integerrimus|evm.model.ctg009700_np12.70/A. integerrimus|evm.model.ctg019130_np12.40/A. integerrimus|evm.model.ctg017880_np12.76/A. integerrimus|evm.model.ctg019910_np12.15/A. integerrimus|evm.model.ctg021870_np12.37/A. …	12
GO:0032944	GO:0032944	regulation of mononuclear cell proliferation	13/494	95/12875	6.55336491859091e-05	0.000718522667044311	0.000625993066850475	A. integerrimus|evm.model.ctg020090_np12.120/A. integerrimus|evm.model.ctg028260_np12.18/A. integerrimus|evm.model.ctg023050_np12.152/A. integerrimus|evm.model.ctg021490_np12.5/A. integerrimus|evm.model.ctg011250_np12.10/A. integerrimus|evm.model.ctg009700_np12.70/A. integerrimus|evm.model.ctg019130_np12.40/A. integerrimus|evm.model.ctg017880_np12.76/A. integerrimus|evm.model.ctg019910_np12.15/A.…	13
GO:0050670	GO:0050670	regulation of lymphocyte proliferation	13/494	95/12875	6.55336491859091e-05	0.000718522667044311	0.000625993066850475	A. integerrimus|evm.model.ctg020090_np12.120/A. integerrimus|evm.model.ctg028260_np12.18/A. integerrimus|evm.model.ctg023050_np12.152/A. integerrimus|evm.model.ctg021490_np12.5/A. integerrimus|evm.model.ctg011250_np12.10/A. integerrimus|evm.model.ctg009700_np12.70/A. integerrimus|evm.model.ctg019130_np12.40/A. integerrimus|evm.model.ctg017880_np12.76/A. integerrimus|evm.model.ctg019910_np12.15/A.…	13
GO:1902107	GO:1902107	positive regulation of leukocyte differentiation	13/494	96/12875	7.31984849831777e-05	0.00080017272423575	0.000697128428411217	A. integerrimus|evm.model.ctg007360_np12.220/A. integerrimus|evm.model.ctg028260_np12.18/A. integerrimus|evm.model.ctg023050_np12.152/A. integerrimus|evm.model.ctg021490_np12.5/A. integerrimus|evm.model.ctg011250_np12.10/A. integerrimus|evm.model.ctg009700_np12.70/A. integerrimus|evm.model.ctg019130_np12.40/A. integerrimus|evm.model.ctg017880_np12.76/A. integerrimus|evm.model.ctg019910_np12.15/A.…	13
GO:0072347	GO:0072347	response to anesthetic	18/494	169/12875	8.63246759120607e-05	0.000939137188073897	0.00081819738683269	A. integerrimus|evm.model.ctg024520_np12.507/A. integerrimus|evm.model.ctg009980_np12.186/A. integerrimus|evm.model.ctg017670_np12.79/A. integerrimus|evm.model.ctg014950_np12.35/A. integerrimus|evm.model.ctg016670_np12.1/A. integerrimus|evm.model.ctg004810_np12.285/A. integerrimus|evm.model.ctg028260_np12.18/A. integerrimus|evm.model.ctg023050_np12.152/A. integerrimus|evm.model.ctg021490_np12.5/A…	18
GO:0099565	GO:0099565	chemical synaptic transmission, postsynaptic	24/494	265/12875	8.64220989842029e-05	0.000939137188073897	0.00081819738683269	A. integerrimus|evm.model.ctg025520_np12.7/A. integerrimus|evm.model.ctg017650_np12.12/A. integerrimus|evm.model.ctg015770_np12.48/A. integerrimus|evm.model.ctg015790_np12.9/A. integerrimus|evm.model.ctg017670_np12.79/A. integerrimus|evm.model.ctg014880_np12.42/A. integerrimus|evm.model.ctg012160_np12.5/A. integerrimus|evm.model.ctg007510_np12.11/A. integerrimus|evm.model.ctg007670_np12.238/A. in…	24
GO:0010586	GO:0010586	miRNA metabolic process	7/494	29/12875	8.77649277524955e-05	0.000950916164114797	0.000828459495008807	A. integerrimus|evm.model.ctg023320_np12.228/A. integerrimus|evm.model.ctg025540_np12.36/A. integerrimus|evm.model.ctg008930_np12.180/A. integerrimus|evm.model.ctg018670_np12.19/A. integerrimus|evm.model.ctg025420_np12.102/A. integerrimus|evm.model.ctg018680_np12.33/A. integerrimus|evm.model.ctg004400_np12.33	7
GO:0050728	GO:0050728	negative regulation of inflammatory response	13/494	98/12875	9.08866716236105e-05	0.000979986397574684	0.000853786134560029	A. integerrimus|evm.model.ctg016810_np12.64/A. integerrimus|evm.model.ctg028260_np12.18/A. integerrimus|evm.model.ctg023050_np12.152/A. integerrimus|evm.model.ctg021490_np12.5/A. integerrimus|evm.model.ctg011250_np12.10/A. integerrimus|evm.model.ctg009700_np12.70/A. integerrimus|evm.model.ctg019130_np12.40/A. integerrimus|evm.model.ctg017880_np12.76/A. integerrimus|evm.model.ctg019910_np12.15/A. …	13
GO:0002819	GO:0002819	regulation of adaptive immune response	12/494	85/12875	9.15152012981531e-05	0.000979986397574684	0.000853786134560029	A. integerrimus|evm.model.ctg028260_np12.18/A. integerrimus|evm.model.ctg023050_np12.152/A. integerrimus|evm.model.ctg021490_np12.5/A. integerrimus|evm.model.ctg011250_np12.10/A. integerrimus|evm.model.ctg009700_np12.70/A. integerrimus|evm.model.ctg019130_np12.40/A. integerrimus|evm.model.ctg017880_np12.76/A. integerrimus|evm.model.ctg019910_np12.15/A. integerrimus|evm.model.ctg021870_np12.37/A. …	12
GO:0009127	GO:0009127	purine nucleoside monophosphate biosynthetic process	12/494	85/12875	9.15152012981531e-05	0.000979986397574684	0.000853786134560029	A. integerrimus|evm.model.ctg028260_np12.18/A. integerrimus|evm.model.ctg023050_np12.152/A. integerrimus|evm.model.ctg021490_np12.5/A. integerrimus|evm.model.ctg011250_np12.10/A. integerrimus|evm.model.ctg009700_np12.70/A. integerrimus|evm.model.ctg019130_np12.40/A. integerrimus|evm.model.ctg017880_np12.76/A. integerrimus|evm.model.ctg019910_np12.15/A. integerrimus|evm.model.ctg021870_np12.37/A. …	12
GO:0009168	GO:0009168	purine ribonucleoside monophosphate biosynthetic process	12/494	85/12875	9.15152012981531e-05	0.000979986397574684	0.000853786134560029	A. integerrimus|evm.model.ctg028260_np12.18/A. integerrimus|evm.model.ctg023050_np12.152/A. integerrimus|evm.model.ctg021490_np12.5/A. integerrimus|evm.model.ctg011250_np12.10/A. integerrimus|evm.model.ctg009700_np12.70/A. integerrimus|evm.model.ctg019130_np12.40/A. integerrimus|evm.model.ctg017880_np12.76/A. integerrimus|evm.model.ctg019910_np12.15/A. integerrimus|evm.model.ctg021870_np12.37/A. …	12
GO:0005343	GO:0005343	organic acid:sodium symporter activity	10/494	61/12875	9.78904344563259e-05	0.00104520803999443	0.000910608692616985	A. integerrimus|evm.model.ctg021930_np12.128/A. integerrimus|evm.model.ctg018440_np12.504/A. integerrimus|evm.model.ctg030550_np12.192/A. integerrimus|evm.model.ctg005780_np12.111/A. integerrimus|evm.model.ctg012130_np12.70/A. integerrimus|evm.model.ctg024520_np12.507/A. integerrimus|evm.model.ctg003800_np12.6/A. integerrimus|evm.model.ctg007680_np12.65/A. integerrimus|evm.model.ctg007680_np12.76…	10
GO:0045216	GO:0045216	cell-cell junction organization	23/494	251/12875	0.000101242864284801	0.00107786968266108	0.000939064248438733	A. integerrimus|evm.model.ctg015430_np12.30/A. integerrimus|evm.model.ctg004790_np12.138/A. integerrimus|evm.model.ctg017800_np12.389/A. integerrimus|evm.model.ctg017800_np12.410/A. integerrimus|evm.model.ctg013790_np12.35/A. integerrimus|evm.model.ctg015510_np12.13/A. integerrimus|evm.model.ctg028310_np12.28/A. integerrimus|evm.model.ctg028310_np12.100/A. integerrimus|evm.model.ctg017800_np12.24…	23
GO:0006937	GO:0006937	regulation of muscle contraction	16/494	142/12875	0.000108818253781506	0.00115517180965166	0.00100641159566711	A. integerrimus|evm.model.ctg014950_np12.35/A. integerrimus|evm.model.ctg016670_np12.1/A. integerrimus|evm.model.ctg004810_np12.285/A. integerrimus|evm.model.ctg028260_np12.18/A. integerrimus|evm.model.ctg023050_np12.152/A. integerrimus|evm.model.ctg021490_np12.5/A. integerrimus|evm.model.ctg011250_np12.10/A. integerrimus|evm.model.ctg009700_np12.70/A. integerrimus|evm.model.ctg019130_np12.40/A. …	16
GO:0007076	GO:0007076	mitotic chromosome condensation	7/494	30/12875	0.000110727794919857	0.00116868732971447	0.00101818661995271	A. integerrimus|evm.model.ctg023320_np12.228/A. integerrimus|evm.model.ctg025540_np12.36/A. integerrimus|evm.model.ctg008930_np12.180/A. integerrimus|evm.model.ctg018670_np12.19/A. integerrimus|evm.model.ctg025420_np12.102/A. integerrimus|evm.model.ctg018680_np12.33/A. integerrimus|evm.model.ctg004400_np12.33	7
GO:0034661	GO:0034661	ncRNA catabolic process	7/494	30/12875	0.000110727794919857	0.00116868732971447	0.00101818661995271	A. integerrimus|evm.model.ctg023320_np12.228/A. integerrimus|evm.model.ctg025540_np12.36/A. integerrimus|evm.model.ctg008930_np12.180/A. integerrimus|evm.model.ctg018670_np12.19/A. integerrimus|evm.model.ctg025420_np12.102/A. integerrimus|evm.model.ctg018680_np12.33/A. integerrimus|evm.model.ctg004400_np12.33	7
GO:0070663	GO:0070663	regulation of leukocyte proliferation	13/494	100/12875	0.000112157610558071	0.00118038654320858	0.00102837923720867	A. integerrimus|evm.model.ctg020090_np12.120/A. integerrimus|evm.model.ctg028260_np12.18/A. integerrimus|evm.model.ctg023050_np12.152/A. integerrimus|evm.model.ctg021490_np12.5/A. integerrimus|evm.model.ctg011250_np12.10/A. integerrimus|evm.model.ctg009700_np12.70/A. integerrimus|evm.model.ctg019130_np12.40/A. integerrimus|evm.model.ctg017880_np12.76/A. integerrimus|evm.model.ctg019910_np12.15/A.…	13
GO:0009116	GO:0009116	nucleoside metabolic process	14/494	114/12875	0.000115383533956446	0.00120104541952899	0.00104637771371979	A. integerrimus|evm.model.ctg015580_np12.262/A. integerrimus|evm.model.ctg020530_np12.109/A. integerrimus|evm.model.ctg028260_np12.18/A. integerrimus|evm.model.ctg023050_np12.152/A. integerrimus|evm.model.ctg021490_np12.5/A. integerrimus|evm.model.ctg011250_np12.10/A. integerrimus|evm.model.ctg009700_np12.70/A. integerrimus|evm.model.ctg019130_np12.40/A. integerrimus|evm.model.ctg017880_np12.76/A…	14
GO:0008519	GO:0008519	ammonium transmembrane transporter activity	8/494	40/12875	0.000115428541544714	0.00120104541952899	0.00104637771371979	A. integerrimus|evm.model.ctg011570_np12.114/A. integerrimus|evm.model.ctg012130_np12.70/A. integerrimus|evm.model.ctg014310_np12.80/A. integerrimus|evm.model.ctg009980_np12.186/A. integerrimus|evm.model.ctg023400_np12.16/A. integerrimus|evm.model.ctg016130_np12.42/A. integerrimus|evm.model.ctg024490_np12.3/A. integerrimus|evm.model.ctg006080_np12.22	8
GO:0032211	GO:0032211	negative regulation of telomere maintenance via telomerase	8/494	40/12875	0.000115428541544714	0.00120104541952899	0.00104637771371979	A. integerrimus|evm.model.ctg023320_np12.228/A. integerrimus|evm.model.ctg025540_np12.36/A. integerrimus|evm.model.ctg008930_np12.180/A. integerrimus|evm.model.ctg018670_np12.19/A. integerrimus|evm.model.ctg025420_np12.102/A. integerrimus|evm.model.ctg018680_np12.33/A. integerrimus|evm.model.ctg004400_np12.33/A. integerrimus|evm.model.ctg024920_np12.173	8
GO:0072488	GO:0072488	ammonium transmembrane transport	8/494	40/12875	0.000115428541544714	0.00120104541952899	0.00104637771371979	A. integerrimus|evm.model.ctg011570_np12.114/A. integerrimus|evm.model.ctg012130_np12.70/A. integerrimus|evm.model.ctg014310_np12.80/A. integerrimus|evm.model.ctg009980_np12.186/A. integerrimus|evm.model.ctg023400_np12.16/A. integerrimus|evm.model.ctg016130_np12.42/A. integerrimus|evm.model.ctg024490_np12.3/A. integerrimus|evm.model.ctg006080_np12.22	8
GO:0003958	GO:0003958	NADPH-hemoprotein reductase activity	5/494	14/12875	0.000122341220312234	0.00126224523091808	0.00109969636235716	A. integerrimus|evm.model.ctg014950_np12.35/A. integerrimus|evm.model.ctg016670_np12.1/A. integerrimus|evm.model.ctg024750_np12.4/A. integerrimus|evm.model.ctg004810_np12.285/A. integerrimus|evm.model.ctg020530_np12.109	5
GO:0031390	GO:0031390	Ctf18 RFC-like complex	5/494	14/12875	0.000122341220312234	0.00126224523091808	0.00109969636235716	A. integerrimus|evm.model.ctg019020_np12.583/A. integerrimus|evm.model.ctg018390_np12.28/A. integerrimus|evm.model.ctg028310_np12.4/A. integerrimus|evm.model.ctg012030_np12.40/A. integerrimus|evm.model.ctg015130_np12.20	5
GO:0032079	GO:0032079	positive regulation of endodeoxyribonuclease activity	5/494	14/12875	0.000122341220312234	0.00126224523091808	0.00109969636235716	A. integerrimus|evm.model.ctg019020_np12.583/A. integerrimus|evm.model.ctg018390_np12.28/A. integerrimus|evm.model.ctg028310_np12.4/A. integerrimus|evm.model.ctg012030_np12.40/A. integerrimus|evm.model.ctg015130_np12.20	5
GO:0045580	GO:0045580	regulation of T cell differentiation	12/494	88/12875	0.000128723539510015	0.00132437411938456	0.00115382444378725	A. integerrimus|evm.model.ctg028260_np12.18/A. integerrimus|evm.model.ctg023050_np12.152/A. integerrimus|evm.model.ctg021490_np12.5/A. integerrimus|evm.model.ctg011250_np12.10/A. integerrimus|evm.model.ctg009700_np12.70/A. integerrimus|evm.model.ctg019130_np12.40/A. integerrimus|evm.model.ctg017880_np12.76/A. integerrimus|evm.model.ctg019910_np12.15/A. integerrimus|evm.model.ctg021870_np12.37/A. …	12
GO:0060078	GO:0060078	regulation of postsynaptic membrane potential	24/494	272/12875	0.000129548012330587	0.00132913365723532	0.0011579710599382	A. integerrimus|evm.model.ctg025520_np12.7/A. integerrimus|evm.model.ctg017650_np12.12/A. integerrimus|evm.model.ctg015770_np12.48/A. integerrimus|evm.model.ctg015790_np12.9/A. integerrimus|evm.model.ctg017670_np12.79/A. integerrimus|evm.model.ctg014880_np12.42/A. integerrimus|evm.model.ctg012160_np12.5/A. integerrimus|evm.model.ctg007510_np12.11/A. integerrimus|evm.model.ctg007670_np12.238/A. in…	24
GO:0044106	GO:0044106	GO:0044106	15/494	130/12875	0.000135707747521389	0.00138845280402803	0.00120965123138842	A. integerrimus|evm.model.ctg015520_np12.6/A. integerrimus|evm.model.ctg029050_np12.204/A. integerrimus|evm.model.ctg018280_np12.28/A. integerrimus|evm.model.ctg029050_np12.193/A. integerrimus|evm.model.ctg019620_np12.254/A. integerrimus|evm.model.ctg019620_np12.252/A. integerrimus|evm.model.ctg019620_np12.263/A. integerrimus|evm.model.ctg017440_np12.6/A. integerrimus|evm.model.ctg015860_np12.1/A…	15
GO:0120111	GO:0120111	neuron projection cytoplasm	13/494	102/12875	0.000137594599755096	0.00140384712472352	0.00122306310893419	A. integerrimus|evm.model.ctg029680_np12.6/A. integerrimus|evm.model.ctg028260_np12.18/A. integerrimus|evm.model.ctg023050_np12.152/A. integerrimus|evm.model.ctg021490_np12.5/A. integerrimus|evm.model.ctg011250_np12.10/A. integerrimus|evm.model.ctg009700_np12.70/A. integerrimus|evm.model.ctg019130_np12.40/A. integerrimus|evm.model.ctg017880_np12.76/A. integerrimus|evm.model.ctg019910_np12.15/A. i…	13
GO:0008334	GO:0008334	histone mRNA metabolic process	7/494	31/12875	0.00013834312310731	0.00140689047215945	0.00122571454149476	A. integerrimus|evm.model.ctg023320_np12.228/A. integerrimus|evm.model.ctg025540_np12.36/A. integerrimus|evm.model.ctg008930_np12.180/A. integerrimus|evm.model.ctg018670_np12.19/A. integerrimus|evm.model.ctg025420_np12.102/A. integerrimus|evm.model.ctg018680_np12.33/A. integerrimus|evm.model.ctg004400_np12.33	7
GO:0050911	GO:0050911	detection of chemical stimulus involved in sensory perception of smell	8/494	41/12875	0.000138658957506595	0.00140689047215945	0.00122571454149476	A. integerrimus|evm.model.ctg015580_np12.15/A. integerrimus|evm.model.ctg015580_np12.52/A. integerrimus|evm.model.ctg007670_np12.238/A. integerrimus|evm.model.ctg007670_np12.379/A. integerrimus|evm.model.ctg007670_np12.242/A. integerrimus|evm.model.ctg029320_np12.34/A. integerrimus|evm.model.ctg021970_np12.8/A. integerrimus|evm.model.ctg029060_np12.35	8
GO:0043296	GO:0043296	apical junction complex	18/494	177/12875	0.000156296787415278	0.00158148236963173	0.00137782291936333	A. integerrimus|evm.model.ctg017800_np12.389/A. integerrimus|evm.model.ctg017800_np12.410/A. integerrimus|evm.model.ctg013790_np12.35/A. integerrimus|evm.model.ctg015510_np12.13/A. integerrimus|evm.model.ctg028310_np12.28/A. integerrimus|evm.model.ctg028310_np12.100/A. integerrimus|evm.model.ctg017800_np12.240/A. integerrimus|evm.model.ctg018390_np12.6/A. integerrimus|evm.model.ctg017800_np12.116…	18
GO:0008094	GO:0008094	ATP-dependent activity, acting on DNA	11/494	77/12875	0.000160243498001241	0.00161696254988615	0.00140873404836256	A. integerrimus|evm.model.ctg028720_np12.105/A. integerrimus|evm.model.ctg013310_np12.178/A. integerrimus|evm.model.ctg019020_np12.583/A. integerrimus|evm.model.ctg018390_np12.28/A. integerrimus|evm.model.ctg028310_np12.4/A. integerrimus|evm.model.ctg012030_np12.40/A. integerrimus|evm.model.ctg015130_np12.20/A. integerrimus|evm.model.ctg005450_np12.1/A. integerrimus|evm.model.ctg024920_np12.173/A…	11
GO:1903037	GO:1903037	regulation of leukocyte cell-cell adhesion	15/494	133/12875	0.000175415719247181	0.00176521078573944	0.00153789123723556	A. integerrimus|evm.model.ctg014950_np12.35/A. integerrimus|evm.model.ctg016670_np12.1/A. integerrimus|evm.model.ctg004810_np12.285/A. integerrimus|evm.model.ctg028260_np12.18/A. integerrimus|evm.model.ctg023050_np12.152/A. integerrimus|evm.model.ctg021490_np12.5/A. integerrimus|evm.model.ctg011250_np12.10/A. integerrimus|evm.model.ctg009700_np12.70/A. integerrimus|evm.model.ctg019130_np12.40/A. …	15
GO:0008504	GO:0008504	monoamine transmembrane transporter activity	5/494	15/12875	0.000177748081643712	0.00177409973879716	0.00154563549255402	A. integerrimus|evm.model.ctg011570_np12.114/A. integerrimus|evm.model.ctg014310_np12.80/A. integerrimus|evm.model.ctg009980_np12.186/A. integerrimus|evm.model.ctg023400_np12.16/A. integerrimus|evm.model.ctg006080_np12.22	5
GO:0051880	GO:0051880	G-quadruplex DNA binding	5/494	15/12875	0.000177748081643712	0.00177409973879716	0.00154563549255402	A. integerrimus|evm.model.ctg019020_np12.583/A. integerrimus|evm.model.ctg018390_np12.28/A. integerrimus|evm.model.ctg028310_np12.4/A. integerrimus|evm.model.ctg012030_np12.40/A. integerrimus|evm.model.ctg015130_np12.20	5
GO:0072719	GO:0072719	cellular response to cisplatin	5/494	15/12875	0.000177748081643712	0.00177409973879716	0.00154563549255402	A. integerrimus|evm.model.ctg019020_np12.583/A. integerrimus|evm.model.ctg018390_np12.28/A. integerrimus|evm.model.ctg028310_np12.4/A. integerrimus|evm.model.ctg012030_np12.40/A. integerrimus|evm.model.ctg015130_np12.20	5
GO:0043279	GO:0043279	response to alkaloid	19/494	196/12875	0.000194389982318357	0.0019349441871418	0.00168576678433263	A. integerrimus|evm.model.ctg024520_np12.507/A. integerrimus|evm.model.ctg009980_np12.186/A. integerrimus|evm.model.ctg017670_np12.79/A. integerrimus|evm.model.ctg014950_np12.35/A. integerrimus|evm.model.ctg016670_np12.1/A. integerrimus|evm.model.ctg004810_np12.285/A. integerrimus|evm.model.ctg022590_np12.420/A. integerrimus|evm.model.ctg028260_np12.18/A. integerrimus|evm.model.ctg023050_np12.152…	19
GO:0070034	GO:0070034	telomerase RNA binding	8/494	43/12875	0.000196729252068926	0.00195293660229504	0.00170144218005558	A. integerrimus|evm.model.ctg023320_np12.228/A. integerrimus|evm.model.ctg025540_np12.36/A. integerrimus|evm.model.ctg008930_np12.180/A. integerrimus|evm.model.ctg018670_np12.19/A. integerrimus|evm.model.ctg025420_np12.102/A. integerrimus|evm.model.ctg018680_np12.33/A. integerrimus|evm.model.ctg004400_np12.33/A. integerrimus|evm.model.ctg000370_np12.285	8
GO:0071103	GO:0071103	DNA conformation change	19/494	197/12875	0.000207660639609218	0.00205589630534948	0.00179114298315229	A. integerrimus|evm.model.ctg002390_np12.263/A. integerrimus|evm.model.ctg023320_np12.228/A. integerrimus|evm.model.ctg025540_np12.36/A. integerrimus|evm.model.ctg008930_np12.180/A. integerrimus|evm.model.ctg018670_np12.19/A. integerrimus|evm.model.ctg025420_np12.102/A. integerrimus|evm.model.ctg018680_np12.33/A. integerrimus|evm.model.ctg004400_np12.33/A. integerrimus|evm.model.ctg028720_np12.10…	19
GO:0060359	GO:0060359	response to ammonium ion	18/494	183/12875	0.000237512376977832	0.00234511548559026	0.00204311722131468	A. integerrimus|evm.model.ctg024520_np12.507/A. integerrimus|evm.model.ctg009980_np12.186/A. integerrimus|evm.model.ctg017670_np12.79/A. integerrimus|evm.model.ctg014950_np12.35/A. integerrimus|evm.model.ctg016670_np12.1/A. integerrimus|evm.model.ctg004810_np12.285/A. integerrimus|evm.model.ctg028260_np12.18/A. integerrimus|evm.model.ctg023050_np12.152/A. integerrimus|evm.model.ctg021490_np12.5/A…	18
GO:0042749	GO:0042749	regulation of circadian sleep/wake cycle	12/494	94/12875	0.000243092022708399	0.0023937721163752	0.00208550796961629	A. integerrimus|evm.model.ctg028260_np12.18/A. integerrimus|evm.model.ctg023050_np12.152/A. integerrimus|evm.model.ctg021490_np12.5/A. integerrimus|evm.model.ctg011250_np12.10/A. integerrimus|evm.model.ctg009700_np12.70/A. integerrimus|evm.model.ctg019130_np12.40/A. integerrimus|evm.model.ctg017880_np12.76/A. integerrimus|evm.model.ctg019910_np12.15/A. integerrimus|evm.model.ctg021870_np12.37/A. …	12
GO:0010181	GO:0010181	FMN binding	5/494	16/12875	0.00025042992967832	0.00242698979342604	0.00211444795506761	A. integerrimus|evm.model.ctg014950_np12.35/A. integerrimus|evm.model.ctg016670_np12.1/A. integerrimus|evm.model.ctg024750_np12.4/A. integerrimus|evm.model.ctg004810_np12.285/A. integerrimus|evm.model.ctg020530_np12.109	5
GO:0016653	GO:0016653	oxidoreductase activity, acting on NAD(P)H, heme protein as acceptor	5/494	16/12875	0.00025042992967832	0.00242698979342604	0.00211444795506761	A. integerrimus|evm.model.ctg014950_np12.35/A. integerrimus|evm.model.ctg016670_np12.1/A. integerrimus|evm.model.ctg024750_np12.4/A. integerrimus|evm.model.ctg004810_np12.285/A. integerrimus|evm.model.ctg020530_np12.109	5
GO:0032071	GO:0032071	regulation of endodeoxyribonuclease activity	5/494	16/12875	0.00025042992967832	0.00242698979342604	0.00211444795506761	A. integerrimus|evm.model.ctg019020_np12.583/A. integerrimus|evm.model.ctg018390_np12.28/A. integerrimus|evm.model.ctg028310_np12.4/A. integerrimus|evm.model.ctg012030_np12.40/A. integerrimus|evm.model.ctg015130_np12.20	5
GO:0032077	GO:0032077	positive regulation of deoxyribonuclease activity	5/494	16/12875	0.00025042992967832	0.00242698979342604	0.00211444795506761	A. integerrimus|evm.model.ctg019020_np12.583/A. integerrimus|evm.model.ctg018390_np12.28/A. integerrimus|evm.model.ctg028310_np12.4/A. integerrimus|evm.model.ctg012030_np12.40/A. integerrimus|evm.model.ctg015130_np12.20	5
GO:0032309	GO:0032309	icosanoid secretion	5/494	16/12875	0.00025042992967832	0.00242698979342604	0.00211444795506761	A. integerrimus|evm.model.ctg018980_np12.9/A. integerrimus|evm.model.ctg015580_np12.206/A. integerrimus|evm.model.ctg014950_np12.35/A. integerrimus|evm.model.ctg016670_np12.1/A. integerrimus|evm.model.ctg004810_np12.285	5
GO:0072711	GO:0072711	cellular response to hydroxyurea	5/494	16/12875	0.00025042992967832	0.00242698979342604	0.00211444795506761	A. integerrimus|evm.model.ctg019020_np12.583/A. integerrimus|evm.model.ctg018390_np12.28/A. integerrimus|evm.model.ctg028310_np12.4/A. integerrimus|evm.model.ctg012030_np12.40/A. integerrimus|evm.model.ctg015130_np12.20	5
GO:0032205	GO:0032205	negative regulation of telomere maintenance	9/494	56/12875	0.00025428593286444	0.00245787429318707	0.0021413552241216	A. integerrimus|evm.model.ctg023320_np12.228/A. integerrimus|evm.model.ctg025540_np12.36/A. integerrimus|evm.model.ctg008930_np12.180/A. integerrimus|evm.model.ctg018670_np12.19/A. integerrimus|evm.model.ctg025420_np12.102/A. integerrimus|evm.model.ctg018680_np12.33/A. integerrimus|evm.model.ctg004400_np12.33/A. integerrimus|evm.model.ctg028720_np12.105/A. integerrimus|evm.model.ctg024920_np12.173	9
GO:0009308	GO:0009308	amine metabolic process	15/494	138/12875	0.00026408265824568	0.00254586772634221	0.00221801707712907	A. integerrimus|evm.model.ctg015520_np12.6/A. integerrimus|evm.model.ctg029050_np12.204/A. integerrimus|evm.model.ctg018280_np12.28/A. integerrimus|evm.model.ctg029050_np12.193/A. integerrimus|evm.model.ctg019620_np12.254/A. integerrimus|evm.model.ctg019620_np12.252/A. integerrimus|evm.model.ctg019620_np12.263/A. integerrimus|evm.model.ctg017440_np12.6/A. integerrimus|evm.model.ctg015860_np12.1/A…	15
GO:1904357	GO:1904357	negative regulation of telomere maintenance via telomere lengthening	8/494	45/12875	0.000273405930825764	0.00262884812545296	0.00229031146241478	A. integerrimus|evm.model.ctg023320_np12.228/A. integerrimus|evm.model.ctg025540_np12.36/A. integerrimus|evm.model.ctg008930_np12.180/A. integerrimus|evm.model.ctg018670_np12.19/A. integerrimus|evm.model.ctg025420_np12.102/A. integerrimus|evm.model.ctg018680_np12.33/A. integerrimus|evm.model.ctg004400_np12.33/A. integerrimus|evm.model.ctg024920_np12.173	8
GO:0008016	GO:0008016	regulation of heart contraction	16/494	154/12875	0.000280485426021047	0.00268987720567965	0.00234348136623329	A. integerrimus|evm.model.ctg016810_np12.64/A. integerrimus|evm.model.ctg014950_np12.35/A. integerrimus|evm.model.ctg016670_np12.1/A. integerrimus|evm.model.ctg004810_np12.285/A. integerrimus|evm.model.ctg028260_np12.18/A. integerrimus|evm.model.ctg023050_np12.152/A. integerrimus|evm.model.ctg021490_np12.5/A. integerrimus|evm.model.ctg011250_np12.10/A. integerrimus|evm.model.ctg009700_np12.70/A. …	16
GO:0050870	GO:0050870	positive regulation of T cell activation	12/494	96/12875	0.000296700916838093	0.00283797517590186	0.00247250764031744	A. integerrimus|evm.model.ctg028260_np12.18/A. integerrimus|evm.model.ctg023050_np12.152/A. integerrimus|evm.model.ctg021490_np12.5/A. integerrimus|evm.model.ctg011250_np12.10/A. integerrimus|evm.model.ctg009700_np12.70/A. integerrimus|evm.model.ctg019130_np12.40/A. integerrimus|evm.model.ctg017880_np12.76/A. integerrimus|evm.model.ctg019910_np12.15/A. integerrimus|evm.model.ctg021870_np12.37/A. …	12
GO:0098862	GO:0098862	cluster of actin-based cell projections	20/494	220/12875	0.000314232532964419	0.00299785998332028	0.00261180287139257	A. integerrimus|evm.model.ctg017330_np12.76/A. integerrimus|evm.model.ctg019260_np12.157/A. integerrimus|evm.model.ctg002360_np12.42/A. integerrimus|evm.model.ctg018040_np12.257/A. integerrimus|evm.model.ctg015520_np12.6/A. integerrimus|evm.model.ctg029050_np12.204/A. integerrimus|evm.model.ctg018280_np12.28/A. integerrimus|evm.model.ctg029050_np12.193/A. integerrimus|evm.model.ctg019620_np12.254…	20
GO:0007229	GO:0007229	integrin-mediated signaling pathway	10/494	70/12875	0.000316338911826576	0.0030101368475104	0.0026224987508939	A. integerrimus|evm.model.ctg001400_np12.97/A. integerrimus|evm.model.ctg023320_np12.532/A. integerrimus|evm.model.ctg029770_np12.291/A. integerrimus|evm.model.ctg029770_np12.285/A. integerrimus|evm.model.ctg029770_np12.292/A. integerrimus|evm.model.ctg029770_np12.286/A. integerrimus|evm.model.ctg029770_np12.293/A. integerrimus|evm.model.ctg026630_np12.42/A. integerrimus|evm.model.ctg010430_np12.…	10
GO:0051539	GO:0051539	4 iron, 4 sulfur cluster binding	8/494	46/12875	0.000320023390500722	0.00303732794136731	0.00264618824186643	A. integerrimus|evm.model.ctg028720_np12.105/A. integerrimus|evm.model.ctg013310_np12.178/A. integerrimus|evm.model.ctg019020_np12.583/A. integerrimus|evm.model.ctg018390_np12.28/A. integerrimus|evm.model.ctg028310_np12.4/A. integerrimus|evm.model.ctg012030_np12.40/A. integerrimus|evm.model.ctg015130_np12.20/A. integerrimus|evm.model.ctg005450_np12.1	8
GO:0031253	GO:0031253	cell projection membrane	31/494	416/12875	0.000321992782382631	0.00304814301466857	0.0026556105763516	A. integerrimus|evm.model.ctg011570_np12.114/A. integerrimus|evm.model.ctg017330_np12.76/A. integerrimus|evm.model.ctg019260_np12.157/A. integerrimus|evm.model.ctg002360_np12.42/A. integerrimus|evm.model.ctg017670_np12.79/A. integerrimus|evm.model.ctg007670_np12.238/A. integerrimus|evm.model.ctg007670_np12.379/A. integerrimus|evm.model.ctg007670_np12.242/A. integerrimus|evm.model.ctg018040_np12.2…	31
GO:0042113	GO:0042113	B cell activation	13/494	111/12875	0.000322968769282271	0.00304952259530535	0.00265681249795185	A. integerrimus|evm.model.ctg007360_np12.220/A. integerrimus|evm.model.ctg028260_np12.18/A. integerrimus|evm.model.ctg023050_np12.152/A. integerrimus|evm.model.ctg021490_np12.5/A. integerrimus|evm.model.ctg011250_np12.10/A. integerrimus|evm.model.ctg009700_np12.70/A. integerrimus|evm.model.ctg019130_np12.40/A. integerrimus|evm.model.ctg017880_np12.76/A. integerrimus|evm.model.ctg019910_np12.15/A.…	13
GO:0009156	GO:0009156	ribonucleoside monophosphate biosynthetic process	12/494	97/12875	0.000327064070407357	0.00308027264258006	0.00268360262898344	A. integerrimus|evm.model.ctg028260_np12.18/A. integerrimus|evm.model.ctg023050_np12.152/A. integerrimus|evm.model.ctg021490_np12.5/A. integerrimus|evm.model.ctg011250_np12.10/A. integerrimus|evm.model.ctg009700_np12.70/A. integerrimus|evm.model.ctg019130_np12.40/A. integerrimus|evm.model.ctg017880_np12.76/A. integerrimus|evm.model.ctg019910_np12.15/A. integerrimus|evm.model.ctg021870_np12.37/A. …	12
GO:0015872	GO:0015872	dopamine transport	5/494	17/12875	0.000343653815432848	0.00322000118388993	0.00280533726883958	A. integerrimus|evm.model.ctg011570_np12.114/A. integerrimus|evm.model.ctg014310_np12.80/A. integerrimus|evm.model.ctg009980_np12.186/A. integerrimus|evm.model.ctg023400_np12.16/A. integerrimus|evm.model.ctg006080_np12.22	5
GO:0072710	GO:0072710	response to hydroxyurea	5/494	17/12875	0.000343653815432848	0.00322000118388993	0.00280533726883958	A. integerrimus|evm.model.ctg019020_np12.583/A. integerrimus|evm.model.ctg018390_np12.28/A. integerrimus|evm.model.ctg028310_np12.4/A. integerrimus|evm.model.ctg012030_np12.40/A. integerrimus|evm.model.ctg015130_np12.20	5
GO:1904356	GO:1904356	regulation of telomere maintenance via telomere lengthening	10/494	71/12875	0.000355813227514503	0.00332545034264827	0.00289720694159392	A. integerrimus|evm.model.ctg023320_np12.228/A. integerrimus|evm.model.ctg025540_np12.36/A. integerrimus|evm.model.ctg008930_np12.180/A. integerrimus|evm.model.ctg018670_np12.19/A. integerrimus|evm.model.ctg025420_np12.102/A. integerrimus|evm.model.ctg018680_np12.33/A. integerrimus|evm.model.ctg004400_np12.33/A. integerrimus|evm.model.ctg028720_np12.105/A. integerrimus|evm.model.ctg024920_np12.17…	10
GO:0009166	GO:0009166	nucleotide catabolic process	12/494	98/12875	0.00036001905628416	0.00335621825820233	0.00292401263987135	A. integerrimus|evm.model.ctg028260_np12.18/A. integerrimus|evm.model.ctg023050_np12.152/A. integerrimus|evm.model.ctg021490_np12.5/A. integerrimus|evm.model.ctg011250_np12.10/A. integerrimus|evm.model.ctg009700_np12.70/A. integerrimus|evm.model.ctg019130_np12.40/A. integerrimus|evm.model.ctg017880_np12.76/A. integerrimus|evm.model.ctg019910_np12.15/A. integerrimus|evm.model.ctg021870_np12.37/A. …	12
GO:0042542	GO:0042542	response to hydrogen peroxide	14/494	127/12875	0.000362919187939458	0.00337468905645982	0.00294010481368674	A. integerrimus|evm.model.ctg028830_np12.44/A. integerrimus|evm.model.ctg022590_np12.420/A. integerrimus|evm.model.ctg028260_np12.18/A. integerrimus|evm.model.ctg023050_np12.152/A. integerrimus|evm.model.ctg021490_np12.5/A. integerrimus|evm.model.ctg011250_np12.10/A. integerrimus|evm.model.ctg009700_np12.70/A. integerrimus|evm.model.ctg019130_np12.40/A. integerrimus|evm.model.ctg017880_np12.76/A.…	14
GO:0035176	GO:0035176	social behavior	11/494	85/12875	0.000388378438257264	0.00359323426629453	0.00313050630333311	A. integerrimus|evm.model.ctg017670_np12.79/A. integerrimus|evm.model.ctg009690_np12.4/A. integerrimus|evm.model.ctg010860_np12.15/A. integerrimus|evm.model.ctg024240_np12.2/A. integerrimus|evm.model.ctg024490_np12.82/A. integerrimus|evm.model.ctg024490_np12.89/A. integerrimus|evm.model.ctg024490_np12.142/A. integerrimus|evm.model.ctg010860_np12.6/A. integerrimus|evm.model.ctg010860_np12.9/A. int…	11
GO:0051703	GO:0051703	biological process involved in intraspecies interaction between organisms	11/494	85/12875	0.000388378438257264	0.00359323426629453	0.00313050630333311	A. integerrimus|evm.model.ctg017670_np12.79/A. integerrimus|evm.model.ctg009690_np12.4/A. integerrimus|evm.model.ctg010860_np12.15/A. integerrimus|evm.model.ctg024240_np12.2/A. integerrimus|evm.model.ctg024490_np12.82/A. integerrimus|evm.model.ctg024490_np12.89/A. integerrimus|evm.model.ctg024490_np12.142/A. integerrimus|evm.model.ctg010860_np12.6/A. integerrimus|evm.model.ctg010860_np12.9/A. int…	11
GO:0071385	GO:0071385	cellular response to glucocorticoid stimulus	16/494	160/12875	0.000432093817587921	0.00398763967839305	0.00347412114643555	A. integerrimus|evm.model.ctg016810_np12.64/A. integerrimus|evm.model.ctg015520_np12.6/A. integerrimus|evm.model.ctg029050_np12.204/A. integerrimus|evm.model.ctg018280_np12.28/A. integerrimus|evm.model.ctg029050_np12.193/A. integerrimus|evm.model.ctg019620_np12.254/A. integerrimus|evm.model.ctg019620_np12.252/A. integerrimus|evm.model.ctg019620_np12.263/A. integerrimus|evm.model.ctg017440_np12.6/…	16
GO:0097035	GO:0097035	regulation of membrane lipid distribution	6/494	27/12875	0.000460385241138509	0.00421139335785773	0.00366906037167022	A. integerrimus|evm.model.ctg014980_np12.59/A. integerrimus|evm.model.ctg029060_np12.35/A. integerrimus|evm.model.ctg021310_np12.361/A. integerrimus|evm.model.ctg000650_np12.37/A. integerrimus|evm.model.ctg000650_np12.38/A. integerrimus|evm.model.ctg002560_np12.516	6
GO:0032070	GO:0032070	regulation of deoxyribonuclease activity	5/494	18/12875	0.000460925709191071	0.00421139335785773	0.00366906037167022	A. integerrimus|evm.model.ctg019020_np12.583/A. integerrimus|evm.model.ctg018390_np12.28/A. integerrimus|evm.model.ctg028310_np12.4/A. integerrimus|evm.model.ctg012030_np12.40/A. integerrimus|evm.model.ctg015130_np12.20	5
GO:0032075	GO:0032075	positive regulation of nuclease activity	5/494	18/12875	0.000460925709191071	0.00421139335785773	0.00366906037167022	A. integerrimus|evm.model.ctg019020_np12.583/A. integerrimus|evm.model.ctg018390_np12.28/A. integerrimus|evm.model.ctg028310_np12.4/A. integerrimus|evm.model.ctg012030_np12.40/A. integerrimus|evm.model.ctg015130_np12.20	5
GO:0045876	GO:0045876	positive regulation of sister chromatid cohesion	5/494	18/12875	0.000460925709191071	0.00421139335785773	0.00366906037167022	A. integerrimus|evm.model.ctg019020_np12.583/A. integerrimus|evm.model.ctg018390_np12.28/A. integerrimus|evm.model.ctg028310_np12.4/A. integerrimus|evm.model.ctg012030_np12.40/A. integerrimus|evm.model.ctg015130_np12.20	5
GO:0001890	GO:0001890	placenta development	12/494	101/12875	0.000476221264397756	0.0043296057032994	0.00377204961899213	A. integerrimus|evm.model.ctg028260_np12.18/A. integerrimus|evm.model.ctg023050_np12.152/A. integerrimus|evm.model.ctg021490_np12.5/A. integerrimus|evm.model.ctg011250_np12.10/A. integerrimus|evm.model.ctg009700_np12.70/A. integerrimus|evm.model.ctg019130_np12.40/A. integerrimus|evm.model.ctg017880_np12.76/A. integerrimus|evm.model.ctg019910_np12.15/A. integerrimus|evm.model.ctg021870_np12.37/A. …	12
GO:0009124	GO:0009124	nucleoside monophosphate biosynthetic process	12/494	101/12875	0.000476221264397756	0.0043296057032994	0.00377204961899213	A. integerrimus|evm.model.ctg028260_np12.18/A. integerrimus|evm.model.ctg023050_np12.152/A. integerrimus|evm.model.ctg021490_np12.5/A. integerrimus|evm.model.ctg011250_np12.10/A. integerrimus|evm.model.ctg009700_np12.70/A. integerrimus|evm.model.ctg019130_np12.40/A. integerrimus|evm.model.ctg017880_np12.76/A. integerrimus|evm.model.ctg019910_np12.15/A. integerrimus|evm.model.ctg021870_np12.37/A. …	12
GO:0033619	GO:0033619	membrane protein proteolysis	8/494	49/12875	0.000500091944067774	0.00453540175447144	0.00395134375559723	A. integerrimus|evm.model.ctg023320_np12.532/A. integerrimus|evm.model.ctg029770_np12.291/A. integerrimus|evm.model.ctg029770_np12.285/A. integerrimus|evm.model.ctg029770_np12.292/A. integerrimus|evm.model.ctg029770_np12.286/A. integerrimus|evm.model.ctg029770_np12.293/A. integerrimus|evm.model.ctg026630_np12.42/A. integerrimus|evm.model.ctg010430_np12.62	8
GO:0000819	GO:0000819	sister chromatid segregation	15/494	147/12875	0.000522602564349574	0.00472787984939898	0.00411903498994738	A. integerrimus|evm.model.ctg023320_np12.228/A. integerrimus|evm.model.ctg025540_np12.36/A. integerrimus|evm.model.ctg008930_np12.180/A. integerrimus|evm.model.ctg018670_np12.19/A. integerrimus|evm.model.ctg025420_np12.102/A. integerrimus|evm.model.ctg018680_np12.33/A. integerrimus|evm.model.ctg004400_np12.33/A. integerrimus|evm.model.ctg019020_np12.583/A. integerrimus|evm.model.ctg018390_np12.28…	15
GO:0071384	GO:0071384	cellular response to corticosteroid stimulus	16/494	163/12875	0.000531305837421652	0.00479480673427452	0.00417734319348719	A. integerrimus|evm.model.ctg016810_np12.64/A. integerrimus|evm.model.ctg015520_np12.6/A. integerrimus|evm.model.ctg029050_np12.204/A. integerrimus|evm.model.ctg018280_np12.28/A. integerrimus|evm.model.ctg029050_np12.193/A. integerrimus|evm.model.ctg019620_np12.254/A. integerrimus|evm.model.ctg019620_np12.252/A. integerrimus|evm.model.ctg019620_np12.263/A. integerrimus|evm.model.ctg017440_np12.6/…	16
GO:0045619	GO:0045619	regulation of lymphocyte differentiation	12/494	103/12875	0.000570069693813544	0.00511947673686344	0.00446020298338225	A. integerrimus|evm.model.ctg028260_np12.18/A. integerrimus|evm.model.ctg023050_np12.152/A. integerrimus|evm.model.ctg021490_np12.5/A. integerrimus|evm.model.ctg011250_np12.10/A. integerrimus|evm.model.ctg009700_np12.70/A. integerrimus|evm.model.ctg019130_np12.40/A. integerrimus|evm.model.ctg017880_np12.76/A. integerrimus|evm.model.ctg019910_np12.15/A. integerrimus|evm.model.ctg021870_np12.37/A. …	12
GO:1903039	GO:1903039	positive regulation of leukocyte cell-cell adhesion	12/494	103/12875	0.000570069693813544	0.00511947673686344	0.00446020298338225	A. integerrimus|evm.model.ctg028260_np12.18/A. integerrimus|evm.model.ctg023050_np12.152/A. integerrimus|evm.model.ctg021490_np12.5/A. integerrimus|evm.model.ctg011250_np12.10/A. integerrimus|evm.model.ctg009700_np12.70/A. integerrimus|evm.model.ctg019130_np12.40/A. integerrimus|evm.model.ctg017880_np12.76/A. integerrimus|evm.model.ctg019910_np12.15/A. integerrimus|evm.model.ctg021870_np12.37/A. …	12
GO:0034330	GO:0034330	cell junction organization	23/494	283/12875	0.000578426502177071	0.0051818549816985	0.0045145483096747	A. integerrimus|evm.model.ctg015430_np12.30/A. integerrimus|evm.model.ctg004790_np12.138/A. integerrimus|evm.model.ctg017800_np12.389/A. integerrimus|evm.model.ctg017800_np12.410/A. integerrimus|evm.model.ctg013790_np12.35/A. integerrimus|evm.model.ctg015510_np12.13/A. integerrimus|evm.model.ctg028310_np12.28/A. integerrimus|evm.model.ctg028310_np12.100/A. integerrimus|evm.model.ctg017800_np12.24…	23
GO:0001505	GO:0001505	regulation of neurotransmitter levels	33/494	471/12875	0.000625511146422232	0.00559003026960793	0.0048701597774967	A. integerrimus|evm.model.ctg011570_np12.114/A. integerrimus|evm.model.ctg014310_np12.80/A. integerrimus|evm.model.ctg015380_np12.3/A. integerrimus|evm.model.ctg022290_np12.55/A. integerrimus|evm.model.ctg028100_np12.31/A. integerrimus|evm.model.ctg020310_np12.29/A. integerrimus|evm.model.ctg016780_np12.92/A. integerrimus|evm.model.ctg024200_np12.230/A. integerrimus|evm.model.ctg016780_np12.66/A.…	33
GO:0032496	GO:0032496	response to lipopolysaccharide	21/494	250/12875	0.000646764289924828	0.00576593504100459	0.00502341196058119	A. integerrimus|evm.model.ctg008510_np12.84/A. integerrimus|evm.model.ctg015520_np12.6/A. integerrimus|evm.model.ctg029050_np12.204/A. integerrimus|evm.model.ctg018280_np12.28/A. integerrimus|evm.model.ctg029050_np12.193/A. integerrimus|evm.model.ctg019620_np12.254/A. integerrimus|evm.model.ctg019620_np12.252/A. integerrimus|evm.model.ctg019620_np12.263/A. integerrimus|evm.model.ctg017440_np12.6/…	21
GO:0022037	GO:0022037	metencephalon development	16/494	166/12875	0.000649441526025993	0.00577578383799873	0.00503199245347017	A. integerrimus|evm.model.ctg015770_np12.48/A. integerrimus|evm.model.ctg015790_np12.9/A. integerrimus|evm.model.ctg017670_np12.79/A. integerrimus|evm.model.ctg017800_np12.410/A. integerrimus|evm.model.ctg013790_np12.35/A. integerrimus|evm.model.ctg015510_np12.13/A. integerrimus|evm.model.ctg028310_np12.28/A. integerrimus|evm.model.ctg028310_np12.100/A. integerrimus|evm.model.ctg017800_np12.240/A…	16
GO:0043628	GO:0043628	regulatory ncRNA 3'-end processing	8/494	51/12875	0.000660291966693004	0.00585809756923527	0.00510370602274786	A. integerrimus|evm.model.ctg008580_np12.66/A. integerrimus|evm.model.ctg023320_np12.228/A. integerrimus|evm.model.ctg025540_np12.36/A. integerrimus|evm.model.ctg008930_np12.180/A. integerrimus|evm.model.ctg018670_np12.19/A. integerrimus|evm.model.ctg025420_np12.102/A. integerrimus|evm.model.ctg018680_np12.33/A. integerrimus|evm.model.ctg004400_np12.33	8
GO:0031225	GO:0031225	GO:0031225	12/494	105/12875	0.000678987307941014	0.00600944670377674	0.00523556478412348	A. integerrimus|evm.model.ctg017800_np12.410/A. integerrimus|evm.model.ctg013790_np12.35/A. integerrimus|evm.model.ctg015510_np12.13/A. integerrimus|evm.model.ctg028310_np12.28/A. integerrimus|evm.model.ctg028310_np12.100/A. integerrimus|evm.model.ctg017800_np12.240/A. integerrimus|evm.model.ctg017800_np12.116/A. integerrimus|evm.model.ctg020980_np12.19/A. integerrimus|evm.model.ctg006290_np12.1/…	12
GO:0006378	GO:0006378	mRNA polyadenylation	7/494	40/12875	0.000727671639841925	0.00640944348474674	0.00558405095322341	A. integerrimus|evm.model.ctg023320_np12.228/A. integerrimus|evm.model.ctg025540_np12.36/A. integerrimus|evm.model.ctg008930_np12.180/A. integerrimus|evm.model.ctg018670_np12.19/A. integerrimus|evm.model.ctg025420_np12.102/A. integerrimus|evm.model.ctg018680_np12.33/A. integerrimus|evm.model.ctg004400_np12.33	7
GO:0043631	GO:0043631	GO:0043631	7/494	40/12875	0.000727671639841925	0.00640944348474674	0.00558405095322341	A. integerrimus|evm.model.ctg023320_np12.228/A. integerrimus|evm.model.ctg025540_np12.36/A. integerrimus|evm.model.ctg008930_np12.180/A. integerrimus|evm.model.ctg018670_np12.19/A. integerrimus|evm.model.ctg025420_np12.102/A. integerrimus|evm.model.ctg018680_np12.33/A. integerrimus|evm.model.ctg004400_np12.33	7
GO:0034329	GO:0034329	cell junction assembly	20/494	236/12875	0.000772951285491483	0.00679198581724933	0.00591733041524581	A. integerrimus|evm.model.ctg004790_np12.138/A. integerrimus|evm.model.ctg017800_np12.389/A. integerrimus|evm.model.ctg017800_np12.410/A. integerrimus|evm.model.ctg013790_np12.35/A. integerrimus|evm.model.ctg015510_np12.13/A. integerrimus|evm.model.ctg028310_np12.28/A. integerrimus|evm.model.ctg028310_np12.100/A. integerrimus|evm.model.ctg017800_np12.240/A. integerrimus|evm.model.ctg018390_np12.6…	20
GO:0035563	GO:0035563	positive regulation of chromatin binding	5/494	20/12875	0.00078270278085387	0.00684492217637206	0.00596344975888663	A. integerrimus|evm.model.ctg019020_np12.583/A. integerrimus|evm.model.ctg018390_np12.28/A. integerrimus|evm.model.ctg028310_np12.4/A. integerrimus|evm.model.ctg012030_np12.40/A. integerrimus|evm.model.ctg015130_np12.20	5
GO:0072718	GO:0072718	response to cisplatin	5/494	20/12875	0.00078270278085387	0.00684492217637206	0.00596344975888663	A. integerrimus|evm.model.ctg019020_np12.583/A. integerrimus|evm.model.ctg018390_np12.28/A. integerrimus|evm.model.ctg028310_np12.4/A. integerrimus|evm.model.ctg012030_np12.40/A. integerrimus|evm.model.ctg015130_np12.20	5
GO:0021549	GO:0021549	cerebellum development	15/494	153/12875	0.000795570149580661	0.00694092436914434	0.00604708902294089	A. integerrimus|evm.model.ctg015770_np12.48/A. integerrimus|evm.model.ctg015790_np12.9/A. integerrimus|evm.model.ctg017800_np12.410/A. integerrimus|evm.model.ctg013790_np12.35/A. integerrimus|evm.model.ctg015510_np12.13/A. integerrimus|evm.model.ctg028310_np12.28/A. integerrimus|evm.model.ctg028310_np12.100/A. integerrimus|evm.model.ctg017800_np12.240/A. integerrimus|evm.model.ctg017800_np12.116/…	15
GO:0007584	GO:0007584	response to nutrient	24/494	308/12875	0.000805695866143827	0.00701260880650776	0.00610954211293897	A. integerrimus|evm.model.ctg017330_np12.76/A. integerrimus|evm.model.ctg019260_np12.157/A. integerrimus|evm.model.ctg002360_np12.42/A. integerrimus|evm.model.ctg017670_np12.79/A. integerrimus|evm.model.ctg008510_np12.84/A. integerrimus|evm.model.ctg007360_np12.220/A. integerrimus|evm.model.ctg014950_np12.35/A. integerrimus|evm.model.ctg016670_np12.1/A. integerrimus|evm.model.ctg024750_np12.4/A. …	24
GO:1903708	GO:1903708	positive regulation of hemopoiesis	13/494	123/12875	0.000870576172354355	0.0075594001916254	0.00658591903435918	A. integerrimus|evm.model.ctg007360_np12.220/A. integerrimus|evm.model.ctg028260_np12.18/A. integerrimus|evm.model.ctg023050_np12.152/A. integerrimus|evm.model.ctg021490_np12.5/A. integerrimus|evm.model.ctg011250_np12.10/A. integerrimus|evm.model.ctg009700_np12.70/A. integerrimus|evm.model.ctg019130_np12.40/A. integerrimus|evm.model.ctg017880_np12.76/A. integerrimus|evm.model.ctg019910_np12.15/A.…	13
GO:0032210	GO:0032210	regulation of telomere maintenance via telomerase	9/494	66/12875	0.000885157897122331	0.00766788904747717	0.00668043695941382	A. integerrimus|evm.model.ctg023320_np12.228/A. integerrimus|evm.model.ctg025540_np12.36/A. integerrimus|evm.model.ctg008930_np12.180/A. integerrimus|evm.model.ctg018670_np12.19/A. integerrimus|evm.model.ctg025420_np12.102/A. integerrimus|evm.model.ctg018680_np12.33/A. integerrimus|evm.model.ctg004400_np12.33/A. integerrimus|evm.model.ctg024920_np12.173/A. integerrimus|evm.model.ctg000370_np12.285	9
GO:1901655	GO:1901655	cellular response to ketone	18/494	205/12875	0.000928459296472051	0.00802407293162787	0.00699075234990721	A. integerrimus|evm.model.ctg015520_np12.6/A. integerrimus|evm.model.ctg029050_np12.204/A. integerrimus|evm.model.ctg018280_np12.28/A. integerrimus|evm.model.ctg029050_np12.193/A. integerrimus|evm.model.ctg019620_np12.254/A. integerrimus|evm.model.ctg019620_np12.252/A. integerrimus|evm.model.ctg019620_np12.263/A. integerrimus|evm.model.ctg017440_np12.6/A. integerrimus|evm.model.ctg015860_np12.1/A…	18
GO:1901292	GO:1901292	nucleoside phosphate catabolic process	12/494	109/12875	0.000949555047662779	0.00818712603301734	0.00713280786976735	A. integerrimus|evm.model.ctg028260_np12.18/A. integerrimus|evm.model.ctg023050_np12.152/A. integerrimus|evm.model.ctg021490_np12.5/A. integerrimus|evm.model.ctg011250_np12.10/A. integerrimus|evm.model.ctg009700_np12.70/A. integerrimus|evm.model.ctg019130_np12.40/A. integerrimus|evm.model.ctg017880_np12.76/A. integerrimus|evm.model.ctg019910_np12.15/A. integerrimus|evm.model.ctg021870_np12.37/A. …	12
GO:0003887	GO:0003887	DNA-directed DNA polymerase activity	7/494	42/12875	0.000985604488212877	0.00847804516441662	0.00738626314351571	A. integerrimus|evm.model.ctg023320_np12.228/A. integerrimus|evm.model.ctg025540_np12.36/A. integerrimus|evm.model.ctg008930_np12.180/A. integerrimus|evm.model.ctg018670_np12.19/A. integerrimus|evm.model.ctg025420_np12.102/A. integerrimus|evm.model.ctg018680_np12.33/A. integerrimus|evm.model.ctg004400_np12.33	7
GO:0032069	GO:0032069	regulation of nuclease activity	5/494	21/12875	0.00099521614854965	0.00850099747354155	0.00740625971013693	A. integerrimus|evm.model.ctg019020_np12.583/A. integerrimus|evm.model.ctg018390_np12.28/A. integerrimus|evm.model.ctg028310_np12.4/A. integerrimus|evm.model.ctg012030_np12.40/A. integerrimus|evm.model.ctg015130_np12.20	5
GO:0051937	GO:0051937	catecholamine transport	5/494	21/12875	0.00099521614854965	0.00850099747354155	0.00740625971013693	A. integerrimus|evm.model.ctg011570_np12.114/A. integerrimus|evm.model.ctg014310_np12.80/A. integerrimus|evm.model.ctg009980_np12.186/A. integerrimus|evm.model.ctg023400_np12.16/A. integerrimus|evm.model.ctg006080_np12.22	5
GO:0071027	GO:0071027	nuclear RNA surveillance	5/494	21/12875	0.00099521614854965	0.00850099747354155	0.00740625971013693	A. integerrimus|evm.model.ctg023320_np12.228/A. integerrimus|evm.model.ctg025540_np12.36/A. integerrimus|evm.model.ctg018670_np12.19/A. integerrimus|evm.model.ctg025420_np12.102/A. integerrimus|evm.model.ctg018680_np12.33	5
GO:1903522	GO:1903522	regulation of blood circulation	17/494	191/12875	0.00109795653551481	0.00935683144999048	0.00815188147017957	A. integerrimus|evm.model.ctg016810_np12.64/A. integerrimus|evm.model.ctg014950_np12.35/A. integerrimus|evm.model.ctg016670_np12.1/A. integerrimus|evm.model.ctg004810_np12.285/A. integerrimus|evm.model.ctg028260_np12.18/A. integerrimus|evm.model.ctg023050_np12.152/A. integerrimus|evm.model.ctg021490_np12.5/A. integerrimus|evm.model.ctg011250_np12.10/A. integerrimus|evm.model.ctg009700_np12.70/A. …	17
GO:0032102	GO:0032102	negative regulation of response to external stimulus	22/494	280/12875	0.00117874136631412	0.0100220301816476	0.00873141752825275	A. integerrimus|evm.model.ctg009980_np12.186/A. integerrimus|evm.model.ctg016810_np12.64/A. integerrimus|evm.model.ctg015770_np12.48/A. integerrimus|evm.model.ctg015790_np12.9/A. integerrimus|evm.model.ctg017670_np12.79/A. integerrimus|evm.model.ctg024490_np12.142/A. integerrimus|evm.model.ctg015580_np12.262/A. integerrimus|evm.model.ctg014950_np12.35/A. integerrimus|evm.model.ctg016670_np12.1/A.…	22
GO:1901838	GO:1901838	positive regulation of transcription of nucleolar large rRNA by RNA polymerase I	5/494	22/12875	0.00124774584231733	0.0105842274337911	0.00922121638664074	A. integerrimus|evm.model.ctg019020_np12.583/A. integerrimus|evm.model.ctg018390_np12.28/A. integerrimus|evm.model.ctg028310_np12.4/A. integerrimus|evm.model.ctg012030_np12.40/A. integerrimus|evm.model.ctg015130_np12.20	5
GO:0002237	GO:0002237	response to molecule of bacterial origin	21/494	264/12875	0.00129696745951148	0.0109764089372941	0.0095628937106837	A. integerrimus|evm.model.ctg008510_np12.84/A. integerrimus|evm.model.ctg015520_np12.6/A. integerrimus|evm.model.ctg029050_np12.204/A. integerrimus|evm.model.ctg018280_np12.28/A. integerrimus|evm.model.ctg029050_np12.193/A. integerrimus|evm.model.ctg019620_np12.254/A. integerrimus|evm.model.ctg019620_np12.252/A. integerrimus|evm.model.ctg019620_np12.263/A. integerrimus|evm.model.ctg017440_np12.6/…	21
GO:0008026	GO:0008026	GO:0008026	11/494	98/12875	0.00130497020054102	0.0109934760242825	0.00957776293975058	A. integerrimus|evm.model.ctg028720_np12.105/A. integerrimus|evm.model.ctg013310_np12.178/A. integerrimus|evm.model.ctg019020_np12.583/A. integerrimus|evm.model.ctg018390_np12.28/A. integerrimus|evm.model.ctg028310_np12.4/A. integerrimus|evm.model.ctg012030_np12.40/A. integerrimus|evm.model.ctg015130_np12.20/A. integerrimus|evm.model.ctg005450_np12.1/A. integerrimus|evm.model.ctg024920_np12.173/A…	11
GO:0070035	GO:0070035	GO:0070035	11/494	98/12875	0.00130497020054102	0.0109934760242825	0.00957776293975058	A. integerrimus|evm.model.ctg028720_np12.105/A. integerrimus|evm.model.ctg013310_np12.178/A. integerrimus|evm.model.ctg019020_np12.583/A. integerrimus|evm.model.ctg018390_np12.28/A. integerrimus|evm.model.ctg028310_np12.4/A. integerrimus|evm.model.ctg012030_np12.40/A. integerrimus|evm.model.ctg015130_np12.20/A. integerrimus|evm.model.ctg005450_np12.1/A. integerrimus|evm.model.ctg024920_np12.173/A…	11
GO:0034061	GO:0034061	DNA polymerase activity	7/494	44/12875	0.00131049816399614	0.0110147820511621	0.00959632522834703	A. integerrimus|evm.model.ctg023320_np12.228/A. integerrimus|evm.model.ctg025540_np12.36/A. integerrimus|evm.model.ctg008930_np12.180/A. integerrimus|evm.model.ctg018670_np12.19/A. integerrimus|evm.model.ctg025420_np12.102/A. integerrimus|evm.model.ctg018680_np12.33/A. integerrimus|evm.model.ctg004400_np12.33	7
GO:0051048	GO:0051048	negative regulation of secretion	16/494	179/12875	0.0014553277472544	0.0122041525471813	0.0106325314867902	A. integerrimus|evm.model.ctg014950_np12.35/A. integerrimus|evm.model.ctg016670_np12.1/A. integerrimus|evm.model.ctg004810_np12.285/A. integerrimus|evm.model.ctg028260_np12.18/A. integerrimus|evm.model.ctg023050_np12.152/A. integerrimus|evm.model.ctg021490_np12.5/A. integerrimus|evm.model.ctg011250_np12.10/A. integerrimus|evm.model.ctg009700_np12.70/A. integerrimus|evm.model.ctg019130_np12.40/A. …	16
GO:0003688	GO:0003688	DNA replication origin binding	5/494	23/12875	0.00154465057248131	0.0129236937419678	0.0112594119178592	A. integerrimus|evm.model.ctg019020_np12.583/A. integerrimus|evm.model.ctg018390_np12.28/A. integerrimus|evm.model.ctg028310_np12.4/A. integerrimus|evm.model.ctg012030_np12.40/A. integerrimus|evm.model.ctg015130_np12.20	5
GO:0016324	GO:0016324	apical plasma membrane	27/494	380/12875	0.00156089610027034	0.0130299349461203	0.0113519716383297	A. integerrimus|evm.model.ctg017330_np12.76/A. integerrimus|evm.model.ctg019260_np12.157/A. integerrimus|evm.model.ctg002360_np12.42/A. integerrimus|evm.model.ctg015970_np12.74/A. integerrimus|evm.model.ctg015430_np12.30/A. integerrimus|evm.model.ctg004790_np12.138/A. integerrimus|evm.model.ctg015520_np12.6/A. integerrimus|evm.model.ctg029050_np12.204/A. integerrimus|evm.model.ctg018280_np12.28/A…	27
GO:0046209	GO:0046209	nitric oxide metabolic process	4/494	14/12875	0.00157660171742272	0.0131311975240219	0.01144019386792	A. integerrimus|evm.model.ctg014950_np12.35/A. integerrimus|evm.model.ctg016670_np12.1/A. integerrimus|evm.model.ctg024750_np12.4/A. integerrimus|evm.model.ctg004810_np12.285	4
GO:2000279	GO:2000279	negative regulation of DNA biosynthetic process	8/494	59/12875	0.00175941599190354	0.0146206672811351	0.0127378533350482	A. integerrimus|evm.model.ctg023320_np12.228/A. integerrimus|evm.model.ctg025540_np12.36/A. integerrimus|evm.model.ctg008930_np12.180/A. integerrimus|evm.model.ctg018670_np12.19/A. integerrimus|evm.model.ctg025420_np12.102/A. integerrimus|evm.model.ctg018680_np12.33/A. integerrimus|evm.model.ctg004400_np12.33/A. integerrimus|evm.model.ctg024920_np12.173	8
GO:0032204	GO:0032204	regulation of telomere maintenance	10/494	87/12875	0.00178627863697725	0.0148073994578716	0.0129005385965666	A. integerrimus|evm.model.ctg023320_np12.228/A. integerrimus|evm.model.ctg025540_np12.36/A. integerrimus|evm.model.ctg008930_np12.180/A. integerrimus|evm.model.ctg018670_np12.19/A. integerrimus|evm.model.ctg025420_np12.102/A. integerrimus|evm.model.ctg018680_np12.33/A. integerrimus|evm.model.ctg004400_np12.33/A. integerrimus|evm.model.ctg028720_np12.105/A. integerrimus|evm.model.ctg024920_np12.17…	10
GO:0051251	GO:0051251	positive regulation of lymphocyte activation	13/494	133/12875	0.00178994973027362	0.0148073994578716	0.0129005385965666	A. integerrimus|evm.model.ctg020090_np12.120/A. integerrimus|evm.model.ctg028260_np12.18/A. integerrimus|evm.model.ctg023050_np12.152/A. integerrimus|evm.model.ctg021490_np12.5/A. integerrimus|evm.model.ctg011250_np12.10/A. integerrimus|evm.model.ctg009700_np12.70/A. integerrimus|evm.model.ctg019130_np12.40/A. integerrimus|evm.model.ctg017880_np12.76/A. integerrimus|evm.model.ctg019910_np12.15/A.…	13
GO:0019748	GO:0019748	secondary metabolic process	16/494	183/12875	0.00183030630275959	0.0151072248315415	0.0131617531883836	A. integerrimus|evm.model.ctg015520_np12.6/A. integerrimus|evm.model.ctg029050_np12.204/A. integerrimus|evm.model.ctg018280_np12.28/A. integerrimus|evm.model.ctg029050_np12.193/A. integerrimus|evm.model.ctg019620_np12.254/A. integerrimus|evm.model.ctg019620_np12.252/A. integerrimus|evm.model.ctg019620_np12.263/A. integerrimus|evm.model.ctg017440_np12.6/A. integerrimus|evm.model.ctg015860_np12.1/A…	16
GO:0007465	GO:0007465	R7 cell fate commitment	5/494	24/12875	0.00189038649364614	0.0154297546470273	0.0134427483992614	A. integerrimus|evm.model.ctg017800_np12.389/A. integerrimus|evm.model.ctg018390_np12.6/A. integerrimus|evm.model.ctg026780_np12.38/A. integerrimus|evm.model.ctg020980_np12.18/A. integerrimus|evm.model.ctg002560_np12.110	5
GO:0015844	GO:0015844	monoamine transport	5/494	24/12875	0.00189038649364614	0.0154297546470273	0.0134427483992614	A. integerrimus|evm.model.ctg011570_np12.114/A. integerrimus|evm.model.ctg014310_np12.80/A. integerrimus|evm.model.ctg009980_np12.186/A. integerrimus|evm.model.ctg023400_np12.16/A. integerrimus|evm.model.ctg006080_np12.22	5
GO:0071025	GO:0071025	RNA surveillance	5/494	24/12875	0.00189038649364614	0.0154297546470273	0.0134427483992614	A. integerrimus|evm.model.ctg023320_np12.228/A. integerrimus|evm.model.ctg025540_np12.36/A. integerrimus|evm.model.ctg018670_np12.19/A. integerrimus|evm.model.ctg025420_np12.102/A. integerrimus|evm.model.ctg018680_np12.33	5
GO:1901836	GO:1901836	regulation of transcription of nucleolar large rRNA by RNA polymerase I	5/494	24/12875	0.00189038649364614	0.0154297546470273	0.0134427483992614	A. integerrimus|evm.model.ctg019020_np12.583/A. integerrimus|evm.model.ctg018390_np12.28/A. integerrimus|evm.model.ctg028310_np12.4/A. integerrimus|evm.model.ctg012030_np12.40/A. integerrimus|evm.model.ctg015130_np12.20	5
GO:2000781	GO:2000781	positive regulation of double-strand break repair	5/494	24/12875	0.00189038649364614	0.0154297546470273	0.0134427483992614	A. integerrimus|evm.model.ctg019020_np12.583/A. integerrimus|evm.model.ctg018390_np12.28/A. integerrimus|evm.model.ctg028310_np12.4/A. integerrimus|evm.model.ctg012030_np12.40/A. integerrimus|evm.model.ctg015130_np12.20	5
GO:0005548	GO:0005548	phospholipid transporter activity	6/494	35/12875	0.00194689316013572	0.015820660568979	0.0137833144080405	A. integerrimus|evm.model.ctg014980_np12.59/A. integerrimus|evm.model.ctg029060_np12.35/A. integerrimus|evm.model.ctg021310_np12.361/A. integerrimus|evm.model.ctg000650_np12.37/A. integerrimus|evm.model.ctg000650_np12.38/A. integerrimus|evm.model.ctg002560_np12.516	6
GO:0031297	GO:0031297	replication fork processing	6/494	35/12875	0.00194689316013572	0.015820660568979	0.0137833144080405	A. integerrimus|evm.model.ctg028720_np12.105/A. integerrimus|evm.model.ctg019020_np12.583/A. integerrimus|evm.model.ctg018390_np12.28/A. integerrimus|evm.model.ctg028310_np12.4/A. integerrimus|evm.model.ctg012030_np12.40/A. integerrimus|evm.model.ctg015130_np12.20	6
GO:2001057	GO:2001057	reactive nitrogen species metabolic process	4/494	15/12875	0.0020852757667969	0.0169077657647793	0.0147304248427154	A. integerrimus|evm.model.ctg014950_np12.35/A. integerrimus|evm.model.ctg016670_np12.1/A. integerrimus|evm.model.ctg024750_np12.4/A. integerrimus|evm.model.ctg004810_np12.285	4
GO:0000302	GO:0000302	response to reactive oxygen species	17/494	203/12875	0.00212337939235213	0.0171787940707255	0.0149665507830987	A. integerrimus|evm.model.ctg028830_np12.44/A. integerrimus|evm.model.ctg014950_np12.35/A. integerrimus|evm.model.ctg016670_np12.1/A. integerrimus|evm.model.ctg004810_np12.285/A. integerrimus|evm.model.ctg022590_np12.420/A. integerrimus|evm.model.ctg028260_np12.18/A. integerrimus|evm.model.ctg023050_np12.152/A. integerrimus|evm.model.ctg021490_np12.5/A. integerrimus|evm.model.ctg011250_np12.10/A.…	17
GO:0051053	GO:0051053	negative regulation of DNA metabolic process	14/494	152/12875	0.00213399087121575	0.017226699934012	0.015008287445913	A. integerrimus|evm.model.ctg023320_np12.228/A. integerrimus|evm.model.ctg025540_np12.36/A. integerrimus|evm.model.ctg008930_np12.180/A. integerrimus|evm.model.ctg018670_np12.19/A. integerrimus|evm.model.ctg025420_np12.102/A. integerrimus|evm.model.ctg018680_np12.33/A. integerrimus|evm.model.ctg004400_np12.33/A. integerrimus|evm.model.ctg014950_np12.35/A. integerrimus|evm.model.ctg016670_np12.1/A…	14
GO:0072511	GO:0072511	GO:0072511	21/494	275/12875	0.00214259307411936	0.0172582113185097	0.015035740871013	A. integerrimus|evm.model.ctg017650_np12.12/A. integerrimus|evm.model.ctg017670_np12.79/A. integerrimus|evm.model.ctg007510_np12.11/A. integerrimus|evm.model.ctg016730_np12.22/A. integerrimus|evm.model.ctg015520_np12.6/A. integerrimus|evm.model.ctg029050_np12.204/A. integerrimus|evm.model.ctg018280_np12.28/A. integerrimus|evm.model.ctg029050_np12.193/A. integerrimus|evm.model.ctg019620_np12.254/A…	21
GO:0044706	GO:0044706	multi-multicellular organism process	20/494	258/12875	0.00227227705201364	0.0182627431335801	0.0159109115239467	A. integerrimus|evm.model.ctg015520_np12.6/A. integerrimus|evm.model.ctg029050_np12.204/A. integerrimus|evm.model.ctg018280_np12.28/A. integerrimus|evm.model.ctg029050_np12.193/A. integerrimus|evm.model.ctg019620_np12.254/A. integerrimus|evm.model.ctg019620_np12.252/A. integerrimus|evm.model.ctg019620_np12.263/A. integerrimus|evm.model.ctg017440_np12.6/A. integerrimus|evm.model.ctg015860_np12.1/A…	20
GO:0002696	GO:0002696	positive regulation of leukocyte activation	14/494	154/12875	0.0024105599363853	0.0193318485728018	0.0168423401668842	A. integerrimus|evm.model.ctg020090_np12.120/A. integerrimus|evm.model.ctg007360_np12.220/A. integerrimus|evm.model.ctg028260_np12.18/A. integerrimus|evm.model.ctg023050_np12.152/A. integerrimus|evm.model.ctg021490_np12.5/A. integerrimus|evm.model.ctg011250_np12.10/A. integerrimus|evm.model.ctg009700_np12.70/A. integerrimus|evm.model.ctg019130_np12.40/A. integerrimus|evm.model.ctg017880_np12.76/A…	14
GO:0046148	GO:0046148	pigment biosynthetic process	12/494	122/12875	0.00251347542078005	0.0201132793475493	0.0175231401884448	A. integerrimus|evm.model.ctg028260_np12.18/A. integerrimus|evm.model.ctg023050_np12.152/A. integerrimus|evm.model.ctg021490_np12.5/A. integerrimus|evm.model.ctg011250_np12.10/A. integerrimus|evm.model.ctg009700_np12.70/A. integerrimus|evm.model.ctg019130_np12.40/A. integerrimus|evm.model.ctg017880_np12.76/A. integerrimus|evm.model.ctg019910_np12.15/A. integerrimus|evm.model.ctg021870_np12.37/A. …	12
GO:0042110	GO:0042110	T cell activation	14/494	155/12875	0.0025595521318796	0.0204374673486821	0.0178055800478581	A. integerrimus|evm.model.ctg007360_np12.220/A. integerrimus|evm.model.ctg028260_np12.18/A. integerrimus|evm.model.ctg023050_np12.152/A. integerrimus|evm.model.ctg021490_np12.5/A. integerrimus|evm.model.ctg011250_np12.10/A. integerrimus|evm.model.ctg009700_np12.70/A. integerrimus|evm.model.ctg019130_np12.40/A. integerrimus|evm.model.ctg017880_np12.76/A. integerrimus|evm.model.ctg019910_np12.15/A.…	14
GO:0050727	GO:0050727	regulation of inflammatory response	16/494	191/12875	0.00282548814386152	0.02251196952799	0.0196129328858067	A. integerrimus|evm.model.ctg016810_np12.64/A. integerrimus|evm.model.ctg014950_np12.35/A. integerrimus|evm.model.ctg016670_np12.1/A. integerrimus|evm.model.ctg004810_np12.285/A. integerrimus|evm.model.ctg028260_np12.18/A. integerrimus|evm.model.ctg023050_np12.152/A. integerrimus|evm.model.ctg021490_np12.5/A. integerrimus|evm.model.ctg011250_np12.10/A. integerrimus|evm.model.ctg009700_np12.70/A. …	16
GO:0030324	GO:0030324	lung development	15/494	174/12875	0.00287577456343654	0.0228630302413472	0.0199187848549717	A. integerrimus|evm.model.ctg014950_np12.35/A. integerrimus|evm.model.ctg016670_np12.1/A. integerrimus|evm.model.ctg004810_np12.285/A. integerrimus|evm.model.ctg028260_np12.18/A. integerrimus|evm.model.ctg023050_np12.152/A. integerrimus|evm.model.ctg021490_np12.5/A. integerrimus|evm.model.ctg011250_np12.10/A. integerrimus|evm.model.ctg009700_np12.70/A. integerrimus|evm.model.ctg019130_np12.40/A. …	15
GO:0015914	GO:0015914	phospholipid transport	6/494	38/12875	0.00300515999120159	0.0238400705133551	0.0207700042588447	A. integerrimus|evm.model.ctg014980_np12.59/A. integerrimus|evm.model.ctg029060_np12.35/A. integerrimus|evm.model.ctg021310_np12.361/A. integerrimus|evm.model.ctg000650_np12.37/A. integerrimus|evm.model.ctg000650_np12.38/A. integerrimus|evm.model.ctg002560_np12.516	6
GO:0016999	GO:0016999	antibiotic metabolic process	15/494	176/12875	0.00320732325005801	0.0253344049407808	0.0220719019358831	A. integerrimus|evm.model.ctg015520_np12.6/A. integerrimus|evm.model.ctg029050_np12.204/A. integerrimus|evm.model.ctg018280_np12.28/A. integerrimus|evm.model.ctg029050_np12.193/A. integerrimus|evm.model.ctg019620_np12.254/A. integerrimus|evm.model.ctg019620_np12.252/A. integerrimus|evm.model.ctg019620_np12.263/A. integerrimus|evm.model.ctg017440_np12.6/A. integerrimus|evm.model.ctg015860_np12.1/A…	15
GO:0030323	GO:0030323	respiratory tube development	15/494	176/12875	0.00320732325005801	0.0253344049407808	0.0220719019358831	A. integerrimus|evm.model.ctg014950_np12.35/A. integerrimus|evm.model.ctg016670_np12.1/A. integerrimus|evm.model.ctg004810_np12.285/A. integerrimus|evm.model.ctg028260_np12.18/A. integerrimus|evm.model.ctg023050_np12.152/A. integerrimus|evm.model.ctg021490_np12.5/A. integerrimus|evm.model.ctg011250_np12.10/A. integerrimus|evm.model.ctg009700_np12.70/A. integerrimus|evm.model.ctg019130_np12.40/A. …	15
GO:0009065	GO:0009065	glutamine family amino acid catabolic process	5/494	27/12875	0.00326609231489335	0.0257432555206079	0.0224281017331732	A. integerrimus|evm.model.ctg014950_np12.35/A. integerrimus|evm.model.ctg016670_np12.1/A. integerrimus|evm.model.ctg004810_np12.285/A. integerrimus|evm.model.ctg010920_np12.12/A. integerrimus|evm.model.ctg010920_np12.14	5
GO:0071872	GO:0071872	cellular response to epinephrine stimulus	4/494	17/12875	0.00342096403980677	0.0269062118162961	0.0234412953477123	A. integerrimus|evm.model.ctg014950_np12.35/A. integerrimus|evm.model.ctg016670_np12.1/A. integerrimus|evm.model.ctg004810_np12.285/A. integerrimus|evm.model.ctg022590_np12.420	4
GO:0045005	GO:0045005	DNA-templated DNA replication maintenance of fidelity	6/494	39/12875	0.00343872924457644	0.0269881464002762	0.0235126785953945	A. integerrimus|evm.model.ctg028720_np12.105/A. integerrimus|evm.model.ctg019020_np12.583/A. integerrimus|evm.model.ctg018390_np12.28/A. integerrimus|evm.model.ctg028310_np12.4/A. integerrimus|evm.model.ctg012030_np12.40/A. integerrimus|evm.model.ctg015130_np12.20	6
GO:0016810	GO:0016810	hydrolase activity, acting on carbon-nitrogen (but not peptide) bonds	12/494	128/12875	0.00373860880819176	0.0292791261247086	0.025508631527108	A. integerrimus|evm.model.ctg028260_np12.18/A. integerrimus|evm.model.ctg023050_np12.152/A. integerrimus|evm.model.ctg021490_np12.5/A. integerrimus|evm.model.ctg011250_np12.10/A. integerrimus|evm.model.ctg009700_np12.70/A. integerrimus|evm.model.ctg019130_np12.40/A. integerrimus|evm.model.ctg017880_np12.76/A. integerrimus|evm.model.ctg019910_np12.15/A. integerrimus|evm.model.ctg021870_np12.37/A. …	12
GO:0009303	GO:0009303	rRNA transcription	5/494	28/12875	0.00385281421585807	0.0301093332230781	0.026231926576055	A. integerrimus|evm.model.ctg019020_np12.583/A. integerrimus|evm.model.ctg018390_np12.28/A. integerrimus|evm.model.ctg028310_np12.4/A. integerrimus|evm.model.ctg012030_np12.40/A. integerrimus|evm.model.ctg015130_np12.20	5
GO:0050867	GO:0050867	positive regulation of cell activation	14/494	163/12875	0.00404593501452034	0.0315514210368009	0.0274883058311361	A. integerrimus|evm.model.ctg020090_np12.120/A. integerrimus|evm.model.ctg007360_np12.220/A. integerrimus|evm.model.ctg028260_np12.18/A. integerrimus|evm.model.ctg023050_np12.152/A. integerrimus|evm.model.ctg021490_np12.5/A. integerrimus|evm.model.ctg011250_np12.10/A. integerrimus|evm.model.ctg009700_np12.70/A. integerrimus|evm.model.ctg019130_np12.40/A. integerrimus|evm.model.ctg017880_np12.76/A…	14
GO:0001935	GO:0001935	endothelial cell proliferation	4/494	18/12875	0.00426668927712554	0.0330623411706374	0.028804653347683	A. integerrimus|evm.model.ctg019250_np12.30/A. integerrimus|evm.model.ctg014950_np12.35/A. integerrimus|evm.model.ctg016670_np12.1/A. integerrimus|evm.model.ctg004810_np12.285	4
GO:0004984	GO:0004984	olfactory receptor activity	4/494	18/12875	0.00426668927712554	0.0330623411706374	0.028804653347683	A. integerrimus|evm.model.ctg015580_np12.15/A. integerrimus|evm.model.ctg015580_np12.52/A. integerrimus|evm.model.ctg029320_np12.34/A. integerrimus|evm.model.ctg021970_np12.8	4
GO:0071871	GO:0071871	response to epinephrine	4/494	18/12875	0.00426668927712554	0.0330623411706374	0.028804653347683	A. integerrimus|evm.model.ctg014950_np12.35/A. integerrimus|evm.model.ctg016670_np12.1/A. integerrimus|evm.model.ctg004810_np12.285/A. integerrimus|evm.model.ctg022590_np12.420	4
GO:0015748	GO:0015748	organophosphate ester transport	7/494	54/12875	0.00435876085862248	0.0337046918604639	0.0293642836791409	A. integerrimus|evm.model.ctg014980_np12.59/A. integerrimus|evm.model.ctg029060_np12.35/A. integerrimus|evm.model.ctg021310_np12.361/A. integerrimus|evm.model.ctg000650_np12.37/A. integerrimus|evm.model.ctg000650_np12.38/A. integerrimus|evm.model.ctg002560_np12.516/A. integerrimus|evm.model.ctg003160_np12.97	7
GO:0016831	GO:0016831	carboxy-lyase activity	6/494	41/12875	0.00444313041220036	0.0342849117731343	0.0298697842836999	A. integerrimus|evm.model.ctg010920_np12.12/A. integerrimus|evm.model.ctg026100_np12.128/A. integerrimus|evm.model.ctg010920_np12.14/A. integerrimus|evm.model.ctg007660_np12.56/A. integerrimus|evm.model.ctg007660_np12.59/A. integerrimus|evm.model.ctg007660_np12.66	6
GO:0042738	GO:0042738	GO:0042738	4/494	19/12875	0.00524288129796286	0.040310790151745	0.0351196647115665	A. integerrimus|evm.model.ctg008510_np12.84/A. integerrimus|evm.model.ctg014950_np12.35/A. integerrimus|evm.model.ctg016670_np12.1/A. integerrimus|evm.model.ctg004810_np12.285	4
GO:0071295	GO:0071295	cellular response to vitamin	5/494	30/12875	0.00524599991629025	0.040310790151745	0.0351196647115665	A. integerrimus|evm.model.ctg007360_np12.220/A. integerrimus|evm.model.ctg014950_np12.35/A. integerrimus|evm.model.ctg016670_np12.1/A. integerrimus|evm.model.ctg004810_np12.285/A. integerrimus|evm.model.ctg005450_np12.1	5
GO:0090257	GO:0090257	regulation of muscle system process	16/494	204/12875	0.00537246283747267	0.0411963590856725	0.0358911922336379	A. integerrimus|evm.model.ctg014950_np12.35/A. integerrimus|evm.model.ctg016670_np12.1/A. integerrimus|evm.model.ctg004810_np12.285/A. integerrimus|evm.model.ctg028260_np12.18/A. integerrimus|evm.model.ctg023050_np12.152/A. integerrimus|evm.model.ctg021490_np12.5/A. integerrimus|evm.model.ctg011250_np12.10/A. integerrimus|evm.model.ctg009700_np12.70/A. integerrimus|evm.model.ctg019130_np12.40/A. …	16
GO:0001963	GO:0001963	synaptic transmission, dopaminergic	3/494	10/12875	0.00550625304391495	0.0416999328459786	0.0363299169907791	A. integerrimus|evm.model.ctg011570_np12.114/A. integerrimus|evm.model.ctg014310_np12.80/A. integerrimus|evm.model.ctg009980_np12.186	3
GO:0007199	GO:0007199	G protein-coupled receptor signaling pathway coupled to cGMP nucleotide second messenger	3/494	10/12875	0.00550625304391495	0.0416999328459786	0.0363299169907791	A. integerrimus|evm.model.ctg014950_np12.35/A. integerrimus|evm.model.ctg016670_np12.1/A. integerrimus|evm.model.ctg004810_np12.285	3
GO:0010034	GO:0010034	response to acetate	3/494	10/12875	0.00550625304391495	0.0416999328459786	0.0363299169907791	A. integerrimus|evm.model.ctg007670_np12.238/A. integerrimus|evm.model.ctg007670_np12.379/A. integerrimus|evm.model.ctg007670_np12.242	3
GO:0019430	GO:0019430	removal of superoxide radicals	3/494	10/12875	0.00550625304391495	0.0416999328459786	0.0363299169907791	A. integerrimus|evm.model.ctg014950_np12.35/A. integerrimus|evm.model.ctg016670_np12.1/A. integerrimus|evm.model.ctg004810_np12.285	3
GO:0031579	GO:0031579	membrane raft organization	3/494	10/12875	0.00550625304391495	0.0416999328459786	0.0363299169907791	A. integerrimus|evm.model.ctg016450_np12.463/A. integerrimus|evm.model.ctg027360_np12.93/A. integerrimus|evm.model.ctg010910_np12.90	3
GO:0034616	GO:0034616	response to laminar fluid shear stress	3/494	10/12875	0.00550625304391495	0.0416999328459786	0.0363299169907791	A. integerrimus|evm.model.ctg014950_np12.35/A. integerrimus|evm.model.ctg016670_np12.1/A. integerrimus|evm.model.ctg004810_np12.285	3
GO:0003697	GO:0003697	single-stranded DNA binding	11/494	118/12875	0.00562730002349557	0.0425289567619326	0.0370521812246622	A. integerrimus|evm.model.ctg020310_np12.59/A. integerrimus|evm.model.ctg007260_np12.4/A. integerrimus|evm.model.ctg019020_np12.583/A. integerrimus|evm.model.ctg018390_np12.28/A. integerrimus|evm.model.ctg028310_np12.4/A. integerrimus|evm.model.ctg012030_np12.40/A. integerrimus|evm.model.ctg015130_np12.20/A. integerrimus|evm.model.ctg007940_np12.33/A. integerrimus|evm.model.ctg013850_np12.325/A. …	11
GO:0098813	GO:0098813	nuclear chromosome segregation	16/494	206/12875	0.00589313249557492	0.0443925817414355	0.0386758131153264	A. integerrimus|evm.model.ctg023320_np12.228/A. integerrimus|evm.model.ctg025540_np12.36/A. integerrimus|evm.model.ctg008930_np12.180/A. integerrimus|evm.model.ctg018670_np12.19/A. integerrimus|evm.model.ctg025420_np12.102/A. integerrimus|evm.model.ctg018680_np12.33/A. integerrimus|evm.model.ctg004400_np12.33/A. integerrimus|evm.model.ctg019020_np12.583/A. integerrimus|evm.model.ctg018390_np12.28…	16
GO:0043186	GO:0043186	P granule	7/494	57/12875	0.00589806150008727	0.0443925817414355	0.0386758131153264	A. integerrimus|evm.model.ctg023320_np12.228/A. integerrimus|evm.model.ctg025540_np12.36/A. integerrimus|evm.model.ctg008930_np12.180/A. integerrimus|evm.model.ctg018670_np12.19/A. integerrimus|evm.model.ctg025420_np12.102/A. integerrimus|evm.model.ctg018680_np12.33/A. integerrimus|evm.model.ctg004400_np12.33	7
GO:0045943	GO:0045943	positive regulation of transcription by RNA polymerase I	5/494	31/12875	0.00606149316903377	0.0455293750712904	0.0396662129670921	A. integerrimus|evm.model.ctg019020_np12.583/A. integerrimus|evm.model.ctg018390_np12.28/A. integerrimus|evm.model.ctg028310_np12.4/A. integerrimus|evm.model.ctg012030_np12.40/A. integerrimus|evm.model.ctg015130_np12.20	5
GO:0031348	GO:0031348	negative regulation of defense response	14/494	171/12875	0.00616849346524114	0.0462385234649607	0.0402840389566769	A. integerrimus|evm.model.ctg016810_np12.64/A. integerrimus|evm.model.ctg028260_np12.18/A. integerrimus|evm.model.ctg023050_np12.152/A. integerrimus|evm.model.ctg021490_np12.5/A. integerrimus|evm.model.ctg011250_np12.10/A. integerrimus|evm.model.ctg009700_np12.70/A. integerrimus|evm.model.ctg019130_np12.40/A. integerrimus|evm.model.ctg017880_np12.76/A. integerrimus|evm.model.ctg019910_np12.15/A. …	14
GO:0030902	GO:0030902	hindbrain development	17/494	226/12875	0.00632991107908748	0.0472725950015241	0.0411849452776687	A. integerrimus|evm.model.ctg015770_np12.48/A. integerrimus|evm.model.ctg015790_np12.9/A. integerrimus|evm.model.ctg017670_np12.79/A. integerrimus|evm.model.ctg017800_np12.410/A. integerrimus|evm.model.ctg013790_np12.35/A. integerrimus|evm.model.ctg015510_np12.13/A. integerrimus|evm.model.ctg028310_np12.28/A. integerrimus|evm.model.ctg028310_np12.100/A. integerrimus|evm.model.ctg017800_np12.240/A…	17
GO:0015248	GO:0015248	sterol transporter activity	4/494	20/12875	0.00635792592724011	0.0472725950015241	0.0411849452776687	A. integerrimus|evm.model.ctg016450_np12.463/A. integerrimus|evm.model.ctg027360_np12.93/A. integerrimus|evm.model.ctg010910_np12.90/A. integerrimus|evm.model.ctg022590_np12.420	4
GO:0015651	GO:0015651	quaternary ammonium group transmembrane transporter activity	4/494	20/12875	0.00635792592724011	0.0472725950015241	0.0411849452776687	A. integerrimus|evm.model.ctg023400_np12.16/A. integerrimus|evm.model.ctg016130_np12.42/A. integerrimus|evm.model.ctg024490_np12.3/A. integerrimus|evm.model.ctg006080_np12.22	4
GO:0015697	GO:0015697	quaternary ammonium group transport	4/494	20/12875	0.00635792592724011	0.0472725950015241	0.0411849452776687	A. integerrimus|evm.model.ctg023400_np12.16/A. integerrimus|evm.model.ctg016130_np12.42/A. integerrimus|evm.model.ctg024490_np12.3/A. integerrimus|evm.model.ctg006080_np12.22	4

## Sheet: waxie-ref_waxie-go.result
	ID	Description	GeneRatio	BgRatio	pvalue	p.adjust	qvalue	geneID	Count
GO:0003777	GO:0003777	microtubule motor activity	292/2895	451/10213	8.93235357616442e-61	6.77429695216309e-57	6.3081221202618e-57	R. ranina|evm.model.ctg151730_np12.3/R. ranina|evm.model.ctg039930_np12.82/R. ranina|evm.model.ctg039930_np12.62/R. ranina|evm.model.ctg122830_np12.4/R. ranina|evm.model.ctg060770_np12.5/R. ranina|evm.model.ctg114610_np12.5/R. ranina|evm.model.ctg036380_np12.5/R. ranina|evm.model.ctg073440_np12.9/R. ranina|evm.model.ctg111110_np12.391/R. ranina|evm.model.ctg049190_np12.25/R. ranina|evm.model.ctg1…	292
GO:0001966	GO:0001966	thigmotaxis	229/2895	320/10213	1.28453160083465e-59	4.87094383036501e-56	4.53574868947352e-56	R. ranina|evm.model.ctg060770_np12.5/R. ranina|evm.model.ctg114610_np12.5/R. ranina|evm.model.ctg036380_np12.5/R. ranina|evm.model.ctg073440_np12.9/R. ranina|evm.model.ctg108460_np12.1/R. ranina|evm.model.ctg028350_np12.3/R. ranina|evm.model.ctg036890_np12.20/R. ranina|evm.model.ctg161020_np12.25/R. ranina|evm.model.ctg059980_np12.10/R. ranina|evm.model.ctg062850_np12.9/R. ranina|evm.model.ctg052…	229
GO:0003774	GO:0003774	cytoskeletal motor activity	295/2895	466/10213	3.28928486067788e-58	6.5159299432658e-55	6.06753469761413e-55	R. ranina|evm.model.ctg151730_np12.3/R. ranina|evm.model.ctg039930_np12.82/R. ranina|evm.model.ctg039930_np12.62/R. ranina|evm.model.ctg122830_np12.4/R. ranina|evm.model.ctg060770_np12.5/R. ranina|evm.model.ctg114610_np12.5/R. ranina|evm.model.ctg036380_np12.5/R. ranina|evm.model.ctg073440_np12.9/R. ranina|evm.model.ctg111110_np12.391/R. ranina|evm.model.ctg049190_np12.25/R. ranina|evm.model.ctg1…	295
GO:0005871	GO:0005871	kinesin complex	246/2895	359/10213	3.43667191100517e-58	6.5159299432658e-55	6.06753469761413e-55	R. ranina|evm.model.ctg060770_np12.5/R. ranina|evm.model.ctg114610_np12.5/R. ranina|evm.model.ctg036380_np12.5/R. ranina|evm.model.ctg073440_np12.9/R. ranina|evm.model.ctg108460_np12.1/R. ranina|evm.model.ctg028350_np12.3/R. ranina|evm.model.ctg036890_np12.20/R. ranina|evm.model.ctg161020_np12.25/R. ranina|evm.model.ctg059980_np12.10/R. ranina|evm.model.ctg062850_np12.9/R. ranina|evm.model.ctg052…	246
GO:0021952	GO:0021952	central nervous system projection neuron axonogenesis	238/2895	346/10213	9.11656056207164e-57	1.38279990605503e-53	1.28764220654608e-53	R. ranina|evm.model.ctg060770_np12.5/R. ranina|evm.model.ctg114610_np12.5/R. ranina|evm.model.ctg036380_np12.5/R. ranina|evm.model.ctg073440_np12.9/R. ranina|evm.model.ctg054770_np12.15/R. ranina|evm.model.ctg108460_np12.1/R. ranina|evm.model.ctg028350_np12.3/R. ranina|evm.model.ctg036890_np12.20/R. ranina|evm.model.ctg161020_np12.25/R. ranina|evm.model.ctg059980_np12.10/R. ranina|evm.model.ctg06…	238
GO:0021955	GO:0021955	central nervous system neuron axonogenesis	241/2895	357/10213	4.2523129815337e-55	5.37492360865859e-52	5.00504698124729e-52	R. ranina|evm.model.ctg010560_np12.1/R. ranina|evm.model.ctg060770_np12.5/R. ranina|evm.model.ctg114610_np12.5/R. ranina|evm.model.ctg036380_np12.5/R. ranina|evm.model.ctg073440_np12.9/R. ranina|evm.model.ctg054770_np12.15/R. ranina|evm.model.ctg108460_np12.1/R. ranina|evm.model.ctg028350_np12.3/R. ranina|evm.model.ctg036890_np12.20/R. ranina|evm.model.ctg161020_np12.25/R. ranina|evm.model.ctg059…	241
GO:0006890	GO:0006890	retrograde vesicle-mediated transport, Golgi to endoplasmic reticulum	264/2895	408/10213	9.05756065872989e-55	9.81322000511535e-52	9.13792097134117e-52	R. ranina|evm.model.ctg060770_np12.5/R. ranina|evm.model.ctg114610_np12.5/R. ranina|evm.model.ctg036380_np12.5/R. ranina|evm.model.ctg073440_np12.9/R. ranina|evm.model.ctg108460_np12.1/R. ranina|evm.model.ctg028350_np12.3/R. ranina|evm.model.ctg036890_np12.20/R. ranina|evm.model.ctg161020_np12.25/R. ranina|evm.model.ctg059980_np12.10/R. ranina|evm.model.ctg062850_np12.9/R. ranina|evm.model.ctg052…	264
GO:0005875	GO:0005875	microtubule associated complex	292/2895	473/10213	3.46499029080252e-54	3.28481079568079e-51	3.05876577118344e-51	R. ranina|evm.model.ctg151730_np12.3/R. ranina|evm.model.ctg039930_np12.82/R. ranina|evm.model.ctg039930_np12.62/R. ranina|evm.model.ctg060770_np12.5/R. ranina|evm.model.ctg114610_np12.5/R. ranina|evm.model.ctg036380_np12.5/R. ranina|evm.model.ctg073440_np12.9/R. ranina|evm.model.ctg108460_np12.1/R. ranina|evm.model.ctg028350_np12.3/R. ranina|evm.model.ctg013950_np12.4/R. ranina|evm.model.ctg0352…	292
GO:0019886	GO:0019886	antigen processing and presentation of exogenous peptide antigen via MHC class II	252/2895	384/10213	5.26597860347102e-54	4.1777730269032e-51	3.89027859725372e-51	R. ranina|evm.model.ctg060770_np12.5/R. ranina|evm.model.ctg114610_np12.5/R. ranina|evm.model.ctg036380_np12.5/R. ranina|evm.model.ctg073440_np12.9/R. ranina|evm.model.ctg108460_np12.1/R. ranina|evm.model.ctg028350_np12.3/R. ranina|evm.model.ctg036890_np12.20/R. ranina|evm.model.ctg161020_np12.25/R. ranina|evm.model.ctg059980_np12.10/R. ranina|evm.model.ctg062850_np12.9/R. ranina|evm.model.ctg052…	252
GO:0007062	GO:0007062	sister chromatid cohesion	246/2895	371/10213	5.50866696585338e-54	4.1777730269032e-51	3.89027859725372e-51	R. ranina|evm.model.ctg060770_np12.5/R. ranina|evm.model.ctg114610_np12.5/R. ranina|evm.model.ctg036380_np12.5/R. ranina|evm.model.ctg073440_np12.9/R. ranina|evm.model.ctg108460_np12.1/R. ranina|evm.model.ctg028350_np12.3/R. ranina|evm.model.ctg036890_np12.20/R. ranina|evm.model.ctg068270_np12.1/R. ranina|evm.model.ctg161020_np12.25/R. ranina|evm.model.ctg173140_np12.1/R. ranina|evm.model.ctg0599…	246
GO:0007080	GO:0007080	mitotic metaphase chromosome alignment	238/2895	354/10213	6.68121083125335e-54	4.60639117674776e-51	4.28940128869653e-51	R. ranina|evm.model.ctg060770_np12.5/R. ranina|evm.model.ctg114610_np12.5/R. ranina|evm.model.ctg036380_np12.5/R. ranina|evm.model.ctg073440_np12.9/R. ranina|evm.model.ctg108460_np12.1/R. ranina|evm.model.ctg028350_np12.3/R. ranina|evm.model.ctg036890_np12.20/R. ranina|evm.model.ctg161020_np12.25/R. ranina|evm.model.ctg059980_np12.10/R. ranina|evm.model.ctg062850_np12.9/R. ranina|evm.model.ctg052…	238
GO:0002495	GO:0002495	antigen processing and presentation of peptide antigen via MHC class II	252/2895	385/10213	1.11649868818278e-53	6.33005464587994e-51	5.89445045236627e-51	R. ranina|evm.model.ctg060770_np12.5/R. ranina|evm.model.ctg114610_np12.5/R. ranina|evm.model.ctg036380_np12.5/R. ranina|evm.model.ctg073440_np12.9/R. ranina|evm.model.ctg108460_np12.1/R. ranina|evm.model.ctg028350_np12.3/R. ranina|evm.model.ctg036890_np12.20/R. ranina|evm.model.ctg161020_np12.25/R. ranina|evm.model.ctg059980_np12.10/R. ranina|evm.model.ctg062850_np12.9/R. ranina|evm.model.ctg052…	252
GO:0002504	GO:0002504	antigen processing and presentation of peptide or polysaccharide antigen via MHC class II	252/2895	385/10213	1.11649868818278e-53	6.33005464587994e-51	5.89445045236627e-51	R. ranina|evm.model.ctg060770_np12.5/R. ranina|evm.model.ctg114610_np12.5/R. ranina|evm.model.ctg036380_np12.5/R. ranina|evm.model.ctg073440_np12.9/R. ranina|evm.model.ctg108460_np12.1/R. ranina|evm.model.ctg028350_np12.3/R. ranina|evm.model.ctg036890_np12.20/R. ranina|evm.model.ctg161020_np12.25/R. ranina|evm.model.ctg059980_np12.10/R. ranina|evm.model.ctg062850_np12.9/R. ranina|evm.model.ctg052…	252
GO:0051310	GO:0051310	metaphase chromosome alignment	240/2895	359/10213	1.16852274581117e-53	6.33005464587994e-51	5.89445045236627e-51	R. ranina|evm.model.ctg060770_np12.5/R. ranina|evm.model.ctg114610_np12.5/R. ranina|evm.model.ctg036380_np12.5/R. ranina|evm.model.ctg073440_np12.9/R. ranina|evm.model.ctg108460_np12.1/R. ranina|evm.model.ctg028350_np12.3/R. ranina|evm.model.ctg036890_np12.20/R. ranina|evm.model.ctg161020_np12.25/R. ranina|evm.model.ctg059980_np12.10/R. ranina|evm.model.ctg062850_np12.9/R. ranina|evm.model.ctg052…	240
GO:0048002	GO:0048002	antigen processing and presentation of peptide antigen	257/2895	397/10213	2.34531884800341e-53	1.18579320955052e-50	1.10419257201788e-50	R. ranina|evm.model.ctg060770_np12.5/R. ranina|evm.model.ctg114610_np12.5/R. ranina|evm.model.ctg036380_np12.5/R. ranina|evm.model.ctg073440_np12.9/R. ranina|evm.model.ctg108460_np12.1/R. ranina|evm.model.ctg028350_np12.3/R. ranina|evm.model.ctg036890_np12.20/R. ranina|evm.model.ctg161020_np12.25/R. ranina|evm.model.ctg059980_np12.10/R. ranina|evm.model.ctg021870_np12.2/R. ranina|evm.model.ctg062…	257
GO:0002478	GO:0002478	antigen processing and presentation of exogenous peptide antigen	254/2895	391/10213	3.68161173753589e-53	1.74508396359201e-50	1.62499560178475e-50	R. ranina|evm.model.ctg060770_np12.5/R. ranina|evm.model.ctg114610_np12.5/R. ranina|evm.model.ctg036380_np12.5/R. ranina|evm.model.ctg073440_np12.9/R. ranina|evm.model.ctg108460_np12.1/R. ranina|evm.model.ctg028350_np12.3/R. ranina|evm.model.ctg036890_np12.20/R. ranina|evm.model.ctg161020_np12.25/R. ranina|evm.model.ctg059980_np12.10/R. ranina|evm.model.ctg021870_np12.2/R. ranina|evm.model.ctg062…	254
GO:0019884	GO:0019884	antigen processing and presentation of exogenous antigen	256/2895	397/10213	1.16607645807732e-52	5.2020728576814e-50	4.84409099519549e-50	R. ranina|evm.model.ctg060770_np12.5/R. ranina|evm.model.ctg114610_np12.5/R. ranina|evm.model.ctg036380_np12.5/R. ranina|evm.model.ctg073440_np12.9/R. ranina|evm.model.ctg108460_np12.1/R. ranina|evm.model.ctg028350_np12.3/R. ranina|evm.model.ctg036890_np12.20/R. ranina|evm.model.ctg161020_np12.25/R. ranina|evm.model.ctg059980_np12.10/R. ranina|evm.model.ctg021870_np12.2/R. ranina|evm.model.ctg062…	256
GO:0050000	GO:0050000	chromosome localization	243/2895	372/10213	1.68146896163473e-51	7.08458922502099e-49	6.59706155766515e-49	R. ranina|evm.model.ctg060770_np12.5/R. ranina|evm.model.ctg114610_np12.5/R. ranina|evm.model.ctg036380_np12.5/R. ranina|evm.model.ctg073440_np12.9/R. ranina|evm.model.ctg108460_np12.1/R. ranina|evm.model.ctg028350_np12.3/R. ranina|evm.model.ctg036890_np12.20/R. ranina|evm.model.ctg161020_np12.25/R. ranina|evm.model.ctg059980_np12.10/R. ranina|evm.model.ctg083960_np12.35/R. ranina|evm.model.ctg06…	243
GO:0051303	GO:0051303	establishment of chromosome localization	241/2895	369/10213	4.70658374323554e-51	1.87867005835254e-48	1.74938893813669e-48	R. ranina|evm.model.ctg060770_np12.5/R. ranina|evm.model.ctg114610_np12.5/R. ranina|evm.model.ctg036380_np12.5/R. ranina|evm.model.ctg073440_np12.9/R. ranina|evm.model.ctg108460_np12.1/R. ranina|evm.model.ctg028350_np12.3/R. ranina|evm.model.ctg036890_np12.20/R. ranina|evm.model.ctg161020_np12.25/R. ranina|evm.model.ctg059980_np12.10/R. ranina|evm.model.ctg083960_np12.35/R. ranina|evm.model.ctg06…	241
GO:0001756	GO:0001756	somitogenesis	243/2895	377/10213	6.53459190561426e-50	2.47791725060893e-47	2.30739879446137e-47	R. ranina|evm.model.ctg070760_np12.18/R. ranina|evm.model.ctg070910_np12.7/R. ranina|evm.model.ctg060770_np12.5/R. ranina|evm.model.ctg114610_np12.5/R. ranina|evm.model.ctg036380_np12.5/R. ranina|evm.model.ctg073440_np12.9/R. ranina|evm.model.ctg108460_np12.1/R. ranina|evm.model.ctg028350_np12.3/R. ranina|evm.model.ctg036890_np12.20/R. ranina|evm.model.ctg161020_np12.25/R. ranina|evm.model.ctg059…	243
GO:0019882	GO:0019882	antigen processing and presentation	261/2895	419/10213	2.00798418296921e-49	7.25169144935167e-47	6.75266460327842e-47	R. ranina|evm.model.ctg060770_np12.5/R. ranina|evm.model.ctg165920_np12.22/R. ranina|evm.model.ctg114610_np12.5/R. ranina|evm.model.ctg036380_np12.5/R. ranina|evm.model.ctg073440_np12.9/R. ranina|evm.model.ctg108460_np12.1/R. ranina|evm.model.ctg028350_np12.3/R. ranina|evm.model.ctg036890_np12.20/R. ranina|evm.model.ctg161020_np12.25/R. ranina|evm.model.ctg059980_np12.10/R. ranina|evm.model.ctg02…	261
GO:0000776	GO:0000776	kinetochore	261/2895	423/10213	2.7478800910407e-48	9.47269209566032e-46	8.82082656975697e-46	R. ranina|evm.model.ctg095720_np12.4/R. ranina|evm.model.ctg060770_np12.5/R. ranina|evm.model.ctg114610_np12.5/R. ranina|evm.model.ctg036380_np12.5/R. ranina|evm.model.ctg073440_np12.9/R. ranina|evm.model.ctg108460_np12.1/R. ranina|evm.model.ctg028350_np12.3/R. ranina|evm.model.ctg069050_np12.20/R. ranina|evm.model.ctg036890_np12.20/R. ranina|evm.model.ctg161020_np12.25/R. ranina|evm.model.ctg059…	261
GO:0061053	GO:0061053	somite development	249/2895	396/10213	3.24351355662521e-48	1.06951333971503e-45	9.95914528668125e-46	R. ranina|evm.model.ctg070760_np12.18/R. ranina|evm.model.ctg070910_np12.7/R. ranina|evm.model.ctg060770_np12.5/R. ranina|evm.model.ctg114610_np12.5/R. ranina|evm.model.ctg036380_np12.5/R. ranina|evm.model.ctg073440_np12.9/R. ranina|evm.model.ctg108460_np12.1/R. ranina|evm.model.ctg028350_np12.3/R. ranina|evm.model.ctg036890_np12.20/R. ranina|evm.model.ctg161020_np12.25/R. ranina|evm.model.ctg059…	249
GO:0021954	GO:0021954	central nervous system neuron development	250/2895	404/10213	1.45329845907161e-46	4.59242313066627e-44	4.27639445697869e-44	R. ranina|evm.model.ctg010560_np12.1/R. ranina|evm.model.ctg060770_np12.5/R. ranina|evm.model.ctg114610_np12.5/R. ranina|evm.model.ctg036380_np12.5/R. ranina|evm.model.ctg073440_np12.9/R. ranina|evm.model.ctg054770_np12.15/R. ranina|evm.model.ctg108460_np12.1/R. ranina|evm.model.ctg028350_np12.3/R. ranina|evm.model.ctg036890_np12.20/R. ranina|evm.model.ctg161020_np12.25/R. ranina|evm.model.ctg059…	250
GO:0000775	GO:0000775	chromosome, centromeric region	289/2895	499/10213	1.3963811409208e-45	4.23606182909735e-43	3.94455624186849e-43	R. ranina|evm.model.ctg095720_np12.4/R. ranina|evm.model.ctg060770_np12.5/R. ranina|evm.model.ctg114610_np12.5/R. ranina|evm.model.ctg036380_np12.5/R. ranina|evm.model.ctg073440_np12.9/R. ranina|evm.model.ctg108460_np12.1/R. ranina|evm.model.ctg028350_np12.3/R. ranina|evm.model.ctg069050_np12.20/R. ranina|evm.model.ctg036890_np12.20/R. ranina|evm.model.ctg071170_np12.22/R. ranina|evm.model.ctg026…	289
GO:0000819	GO:0000819	sister chromatid segregation	278/2895	473/10213	1.55615593725401e-45	4.53918716466708e-43	4.22682193645228e-43	R. ranina|evm.model.ctg060770_np12.5/R. ranina|evm.model.ctg114610_np12.5/R. ranina|evm.model.ctg036380_np12.5/R. ranina|evm.model.ctg073440_np12.9/R. ranina|evm.model.ctg108460_np12.1/R. ranina|evm.model.ctg028350_np12.3/R. ranina|evm.model.ctg069050_np12.20/R. ranina|evm.model.ctg036890_np12.20/R. ranina|evm.model.ctg068270_np12.1/R. ranina|evm.model.ctg161020_np12.25/R. ranina|evm.model.ctg173…	278
GO:0000070	GO:0000070	mitotic sister chromatid segregation	267/2895	448/10213	2.65826844273784e-45	7.46678069249028e-43	6.95295242975756e-43	R. ranina|evm.model.ctg060770_np12.5/R. ranina|evm.model.ctg114610_np12.5/R. ranina|evm.model.ctg036380_np12.5/R. ranina|evm.model.ctg073440_np12.9/R. ranina|evm.model.ctg108460_np12.1/R. ranina|evm.model.ctg028350_np12.3/R. ranina|evm.model.ctg069050_np12.20/R. ranina|evm.model.ctg036890_np12.20/R. ranina|evm.model.ctg161020_np12.25/R. ranina|evm.model.ctg173140_np12.1/R. ranina|evm.model.ctg059…	267
GO:0140014	GO:0140014	mitotic nuclear division	277/2895	487/10213	1.29135858078996e-41	3.49773695596823e-39	3.2570393678646e-39	R. ranina|evm.model.ctg101620_np12.2/R. ranina|evm.model.ctg060770_np12.5/R. ranina|evm.model.ctg114610_np12.5/R. ranina|evm.model.ctg036380_np12.5/R. ranina|evm.model.ctg073440_np12.9/R. ranina|evm.model.ctg108460_np12.1/R. ranina|evm.model.ctg028350_np12.3/R. ranina|evm.model.ctg069050_np12.20/R. ranina|evm.model.ctg036890_np12.20/R. ranina|evm.model.ctg161020_np12.25/R. ranina|evm.model.ctg173…	277
GO:0072686	GO:0072686	mitotic spindle	247/2895	418/10213	5.5826142011967e-41	1.45994986558192e-38	1.3594830735328e-38	R. ranina|evm.model.ctg028650_np12.13/R. ranina|evm.model.ctg060770_np12.5/R. ranina|evm.model.ctg114610_np12.5/R. ranina|evm.model.ctg036380_np12.5/R. ranina|evm.model.ctg073440_np12.9/R. ranina|evm.model.ctg108460_np12.1/R. ranina|evm.model.ctg028350_np12.3/R. ranina|evm.model.ctg036890_np12.20/R. ranina|evm.model.ctg164250_np12.1/R. ranina|evm.model.ctg161020_np12.25/R. ranina|evm.model.ctg173…	247
GO:0003861	GO:0003861	3-isopropylmalate dehydratase activity	49/2895	57/10213	1.40889435393413e-19	2.73975763595805e-17	2.55122057234657e-17	R. ranina|evm.model.ctg119810_np12.7/R. ranina|evm.model.ctg038340_np12.35/R. ranina|evm.model.ctg123680_np12.58/R. ranina|evm.model.ctg106280_np12.9/R. ranina|evm.model.ctg066000_np12.1/R. ranina|evm.model.ctg117080_np12.13/R. ranina|evm.model.ctg134710_np12.40/R. ranina|evm.model.ctg157100_np12.5/R. ranina|evm.model.ctg165480_np12.16/R. ranina|evm.model.ctg051290_np12.1/R. ranina|evm.model.ctg0…	49
GO:0009532	GO:0009532	plastid stroma	49/2895	57/10213	1.40889435393413e-19	2.73975763595805e-17	2.55122057234657e-17	R. ranina|evm.model.ctg119810_np12.7/R. ranina|evm.model.ctg038340_np12.35/R. ranina|evm.model.ctg123680_np12.58/R. ranina|evm.model.ctg106280_np12.9/R. ranina|evm.model.ctg066000_np12.1/R. ranina|evm.model.ctg117080_np12.13/R. ranina|evm.model.ctg134710_np12.40/R. ranina|evm.model.ctg157100_np12.5/R. ranina|evm.model.ctg165480_np12.16/R. ranina|evm.model.ctg051290_np12.1/R. ranina|evm.model.ctg0…	49
GO:0009570	GO:0009570	chloroplast stroma	49/2895	57/10213	1.40889435393413e-19	2.73975763595805e-17	2.55122057234657e-17	R. ranina|evm.model.ctg119810_np12.7/R. ranina|evm.model.ctg038340_np12.35/R. ranina|evm.model.ctg123680_np12.58/R. ranina|evm.model.ctg106280_np12.9/R. ranina|evm.model.ctg066000_np12.1/R. ranina|evm.model.ctg117080_np12.13/R. ranina|evm.model.ctg134710_np12.40/R. ranina|evm.model.ctg157100_np12.5/R. ranina|evm.model.ctg165480_np12.16/R. ranina|evm.model.ctg051290_np12.1/R. ranina|evm.model.ctg0…	49
GO:0016143	GO:0016143	S-glycoside metabolic process	49/2895	57/10213	1.40889435393413e-19	2.73975763595805e-17	2.55122057234657e-17	R. ranina|evm.model.ctg119810_np12.7/R. ranina|evm.model.ctg038340_np12.35/R. ranina|evm.model.ctg123680_np12.58/R. ranina|evm.model.ctg106280_np12.9/R. ranina|evm.model.ctg066000_np12.1/R. ranina|evm.model.ctg117080_np12.13/R. ranina|evm.model.ctg134710_np12.40/R. ranina|evm.model.ctg157100_np12.5/R. ranina|evm.model.ctg165480_np12.16/R. ranina|evm.model.ctg051290_np12.1/R. ranina|evm.model.ctg0…	49
GO:0016144	GO:0016144	S-glycoside biosynthetic process	49/2895	57/10213	1.40889435393413e-19	2.73975763595805e-17	2.55122057234657e-17	R. ranina|evm.model.ctg119810_np12.7/R. ranina|evm.model.ctg038340_np12.35/R. ranina|evm.model.ctg123680_np12.58/R. ranina|evm.model.ctg106280_np12.9/R. ranina|evm.model.ctg066000_np12.1/R. ranina|evm.model.ctg117080_np12.13/R. ranina|evm.model.ctg134710_np12.40/R. ranina|evm.model.ctg157100_np12.5/R. ranina|evm.model.ctg165480_np12.16/R. ranina|evm.model.ctg051290_np12.1/R. ranina|evm.model.ctg0…	49
GO:0019757	GO:0019757	glycosinolate metabolic process	49/2895	57/10213	1.40889435393413e-19	2.73975763595805e-17	2.55122057234657e-17	R. ranina|evm.model.ctg119810_np12.7/R. ranina|evm.model.ctg038340_np12.35/R. ranina|evm.model.ctg123680_np12.58/R. ranina|evm.model.ctg106280_np12.9/R. ranina|evm.model.ctg066000_np12.1/R. ranina|evm.model.ctg117080_np12.13/R. ranina|evm.model.ctg134710_np12.40/R. ranina|evm.model.ctg157100_np12.5/R. ranina|evm.model.ctg165480_np12.16/R. ranina|evm.model.ctg051290_np12.1/R. ranina|evm.model.ctg0…	49
GO:0019758	GO:0019758	glycosinolate biosynthetic process	49/2895	57/10213	1.40889435393413e-19	2.73975763595805e-17	2.55122057234657e-17	R. ranina|evm.model.ctg119810_np12.7/R. ranina|evm.model.ctg038340_np12.35/R. ranina|evm.model.ctg123680_np12.58/R. ranina|evm.model.ctg106280_np12.9/R. ranina|evm.model.ctg066000_np12.1/R. ranina|evm.model.ctg117080_np12.13/R. ranina|evm.model.ctg134710_np12.40/R. ranina|evm.model.ctg157100_np12.5/R. ranina|evm.model.ctg165480_np12.16/R. ranina|evm.model.ctg051290_np12.1/R. ranina|evm.model.ctg0…	49
GO:0019760	GO:0019760	glucosinolate metabolic process	49/2895	57/10213	1.40889435393413e-19	2.73975763595805e-17	2.55122057234657e-17	R. ranina|evm.model.ctg119810_np12.7/R. ranina|evm.model.ctg038340_np12.35/R. ranina|evm.model.ctg123680_np12.58/R. ranina|evm.model.ctg106280_np12.9/R. ranina|evm.model.ctg066000_np12.1/R. ranina|evm.model.ctg117080_np12.13/R. ranina|evm.model.ctg134710_np12.40/R. ranina|evm.model.ctg157100_np12.5/R. ranina|evm.model.ctg165480_np12.16/R. ranina|evm.model.ctg051290_np12.1/R. ranina|evm.model.ctg0…	49
GO:0019761	GO:0019761	glucosinolate biosynthetic process	49/2895	57/10213	1.40889435393413e-19	2.73975763595805e-17	2.55122057234657e-17	R. ranina|evm.model.ctg119810_np12.7/R. ranina|evm.model.ctg038340_np12.35/R. ranina|evm.model.ctg123680_np12.58/R. ranina|evm.model.ctg106280_np12.9/R. ranina|evm.model.ctg066000_np12.1/R. ranina|evm.model.ctg117080_np12.13/R. ranina|evm.model.ctg134710_np12.40/R. ranina|evm.model.ctg157100_np12.5/R. ranina|evm.model.ctg165480_np12.16/R. ranina|evm.model.ctg051290_np12.1/R. ranina|evm.model.ctg0…	49
GO:0050486	GO:0050486	intramolecular transferase activity, transferring hydroxy groups	49/2895	57/10213	1.40889435393413e-19	2.73975763595805e-17	2.55122057234657e-17	R. ranina|evm.model.ctg119810_np12.7/R. ranina|evm.model.ctg038340_np12.35/R. ranina|evm.model.ctg123680_np12.58/R. ranina|evm.model.ctg106280_np12.9/R. ranina|evm.model.ctg066000_np12.1/R. ranina|evm.model.ctg117080_np12.13/R. ranina|evm.model.ctg134710_np12.40/R. ranina|evm.model.ctg157100_np12.5/R. ranina|evm.model.ctg165480_np12.16/R. ranina|evm.model.ctg051290_np12.1/R. ranina|evm.model.ctg0…	49
GO:0006551	GO:0006551	leucine metabolic process	51/2895	61/10213	3.17033706102304e-19	6.01095906769969e-17	5.59731351115884e-17	R. ranina|evm.model.ctg119810_np12.7/R. ranina|evm.model.ctg038340_np12.35/R. ranina|evm.model.ctg123680_np12.58/R. ranina|evm.model.ctg106280_np12.9/R. ranina|evm.model.ctg066000_np12.1/R. ranina|evm.model.ctg117080_np12.13/R. ranina|evm.model.ctg134710_np12.40/R. ranina|evm.model.ctg157100_np12.5/R. ranina|evm.model.ctg165480_np12.16/R. ranina|evm.model.ctg051290_np12.1/R. ranina|evm.model.ctg0…	51
GO:0009082	GO:0009082	branched-chain amino acid biosynthetic process	49/2895	58/10213	6.58931574835327e-19	1.13575842353435e-16	1.05760094152397e-16	R. ranina|evm.model.ctg119810_np12.7/R. ranina|evm.model.ctg038340_np12.35/R. ranina|evm.model.ctg123680_np12.58/R. ranina|evm.model.ctg106280_np12.9/R. ranina|evm.model.ctg066000_np12.1/R. ranina|evm.model.ctg117080_np12.13/R. ranina|evm.model.ctg134710_np12.40/R. ranina|evm.model.ctg157100_np12.5/R. ranina|evm.model.ctg165480_np12.16/R. ranina|evm.model.ctg051290_np12.1/R. ranina|evm.model.ctg0…	49
GO:0009098	GO:0009098	leucine biosynthetic process	49/2895	58/10213	6.58931574835327e-19	1.13575842353435e-16	1.05760094152397e-16	R. ranina|evm.model.ctg119810_np12.7/R. ranina|evm.model.ctg038340_np12.35/R. ranina|evm.model.ctg123680_np12.58/R. ranina|evm.model.ctg106280_np12.9/R. ranina|evm.model.ctg066000_np12.1/R. ranina|evm.model.ctg117080_np12.13/R. ranina|evm.model.ctg134710_np12.40/R. ranina|evm.model.ctg157100_np12.5/R. ranina|evm.model.ctg165480_np12.16/R. ranina|evm.model.ctg051290_np12.1/R. ranina|evm.model.ctg0…	49
GO:0044434	GO:0044434	GO:0044434	49/2895	58/10213	6.58931574835327e-19	1.13575842353435e-16	1.05760094152397e-16	R. ranina|evm.model.ctg119810_np12.7/R. ranina|evm.model.ctg038340_np12.35/R. ranina|evm.model.ctg123680_np12.58/R. ranina|evm.model.ctg106280_np12.9/R. ranina|evm.model.ctg066000_np12.1/R. ranina|evm.model.ctg117080_np12.13/R. ranina|evm.model.ctg134710_np12.40/R. ranina|evm.model.ctg157100_np12.5/R. ranina|evm.model.ctg165480_np12.16/R. ranina|evm.model.ctg051290_np12.1/R. ranina|evm.model.ctg0…	49
GO:0044435	GO:0044435	GO:0044435	49/2895	58/10213	6.58931574835327e-19	1.13575842353435e-16	1.05760094152397e-16	R. ranina|evm.model.ctg119810_np12.7/R. ranina|evm.model.ctg038340_np12.35/R. ranina|evm.model.ctg123680_np12.58/R. ranina|evm.model.ctg106280_np12.9/R. ranina|evm.model.ctg066000_np12.1/R. ranina|evm.model.ctg117080_np12.13/R. ranina|evm.model.ctg134710_np12.40/R. ranina|evm.model.ctg157100_np12.5/R. ranina|evm.model.ctg165480_np12.16/R. ranina|evm.model.ctg051290_np12.1/R. ranina|evm.model.ctg0…	49
GO:0044331	GO:0044331	cell-cell adhesion mediated by cadherin	54/2895	69/10213	8.76522563961061e-18	1.47723269446238e-15	1.37557658049468e-15	R. ranina|evm.model.ctg024470_np12.13/R. ranina|evm.model.ctg019910_np12.40/R. ranina|evm.model.ctg167530_np12.10/R. ranina|evm.model.ctg101500_np12.92/R. ranina|evm.model.ctg095650_np12.1/R. ranina|evm.model.ctg019910_np12.6/R. ranina|evm.model.ctg130180_np12.1/R. ranina|evm.model.ctg000610_np12.1/R. ranina|evm.model.ctg123790_np12.1/R. ranina|evm.model.ctg075370_np12.8/R. ranina|evm.model.ctg11…	54
GO:0045463	GO:0045463	R8 cell development	38/2895	44/10213	1.36480427798462e-15	2.25014687918161e-13	2.09530249450774e-13	R. ranina|evm.model.ctg024470_np12.13/R. ranina|evm.model.ctg019910_np12.40/R. ranina|evm.model.ctg167530_np12.10/R. ranina|evm.model.ctg101500_np12.92/R. ranina|evm.model.ctg095650_np12.1/R. ranina|evm.model.ctg019910_np12.6/R. ranina|evm.model.ctg130180_np12.1/R. ranina|evm.model.ctg000610_np12.1/R. ranina|evm.model.ctg123790_np12.1/R. ranina|evm.model.ctg075370_np12.8/R. ranina|evm.model.ctg11…	38
GO:0016866	GO:0016866	intramolecular transferase activity	54/2895	75/10213	4.7486892582838e-15	7.66256581592008e-13	7.13526455404838e-13	R. ranina|evm.model.ctg119810_np12.7/R. ranina|evm.model.ctg038340_np12.35/R. ranina|evm.model.ctg123680_np12.58/R. ranina|evm.model.ctg106280_np12.9/R. ranina|evm.model.ctg066000_np12.1/R. ranina|evm.model.ctg117080_np12.13/R. ranina|evm.model.ctg134710_np12.40/R. ranina|evm.model.ctg157100_np12.5/R. ranina|evm.model.ctg165480_np12.16/R. ranina|evm.model.ctg051290_np12.1/R. ranina|evm.model.ctg0…	54
GO:0016339	GO:0016339	calcium-dependent cell-cell adhesion via plasma membrane cell adhesion molecules	56/2895	80/10213	1.09197717628468e-14	1.72532393852979e-12	1.60659536747673e-12	R. ranina|evm.model.ctg024470_np12.13/R. ranina|evm.model.ctg019910_np12.40/R. ranina|evm.model.ctg167530_np12.10/R. ranina|evm.model.ctg101500_np12.92/R. ranina|evm.model.ctg095650_np12.1/R. ranina|evm.model.ctg019910_np12.6/R. ranina|evm.model.ctg130180_np12.1/R. ranina|evm.model.ctg000610_np12.1/R. ranina|evm.model.ctg123790_np12.1/R. ranina|evm.model.ctg075370_np12.8/R. ranina|evm.model.ctg11…	56
GO:0009081	GO:0009081	branched-chain amino acid metabolic process	53/2895	75/10213	3.02765607518687e-14	4.68607013759536e-12	4.36359712318555e-12	R. ranina|evm.model.ctg119810_np12.7/R. ranina|evm.model.ctg038340_np12.35/R. ranina|evm.model.ctg123680_np12.58/R. ranina|evm.model.ctg106280_np12.9/R. ranina|evm.model.ctg066000_np12.1/R. ranina|evm.model.ctg117080_np12.13/R. ranina|evm.model.ctg134710_np12.40/R. ranina|evm.model.ctg157100_np12.5/R. ranina|evm.model.ctg165480_np12.16/R. ranina|evm.model.ctg051290_np12.1/R. ranina|evm.model.ctg0…	53
GO:0042623	GO:0042623	GO:0042623	185/2895	407/10213	5.04934906206566e-14	7.65885265734119e-12	7.13180691734705e-12	R. ranina|evm.model.ctg151730_np12.3/R. ranina|evm.model.ctg039930_np12.82/R. ranina|evm.model.ctg014200_np12.18/R. ranina|evm.model.ctg003050_np12.2/R. ranina|evm.model.ctg039930_np12.62/R. ranina|evm.model.ctg070410_np12.1/R. ranina|evm.model.ctg013950_np12.4/R. ranina|evm.model.ctg035270_np12.16/R. ranina|evm.model.ctg156710_np12.5/R. ranina|evm.model.ctg068270_np12.1/R. ranina|evm.model.ctg05…	185
GO:1901659	GO:1901659	glycosyl compound biosynthetic process	61/2895	96/10213	6.32605129211602e-13	9.40721039204077e-11	8.7598510049136e-11	R. ranina|evm.model.ctg051860_np12.17/R. ranina|evm.model.ctg119810_np12.7/R. ranina|evm.model.ctg038340_np12.35/R. ranina|evm.model.ctg123680_np12.58/R. ranina|evm.model.ctg106280_np12.9/R. ranina|evm.model.ctg066000_np12.1/R. ranina|evm.model.ctg117080_np12.13/R. ranina|evm.model.ctg134710_np12.40/R. ranina|evm.model.ctg157100_np12.5/R. ranina|evm.model.ctg165480_np12.16/R. ranina|evm.model.ctg…	61
GO:0051539	GO:0051539	4 iron, 4 sulfur cluster binding	65/2895	105/10213	6.53281369182785e-13	9.52785750746584e-11	8.8721957608245e-11	R. ranina|evm.model.ctg119810_np12.7/R. ranina|evm.model.ctg068270_np12.1/R. ranina|evm.model.ctg096350_np12.5/R. ranina|evm.model.ctg038340_np12.35/R. ranina|evm.model.ctg123680_np12.58/R. ranina|evm.model.ctg106280_np12.9/R. ranina|evm.model.ctg066000_np12.1/R. ranina|evm.model.ctg117080_np12.13/R. ranina|evm.model.ctg134710_np12.40/R. ranina|evm.model.ctg157100_np12.5/R. ranina|evm.model.ctg16…	65
GO:0003381	GO:0003381	epithelial cell morphogenesis involved in gastrulation	38/2895	49/10213	1.14231509389004e-12	1.6043180874189e-10	1.49391656236029e-10	R. ranina|evm.model.ctg127760_np12.2/R. ranina|evm.model.ctg143790_np12.2/R. ranina|evm.model.ctg024470_np12.13/R. ranina|evm.model.ctg019910_np12.40/R. ranina|evm.model.ctg167530_np12.10/R. ranina|evm.model.ctg095650_np12.1/R. ranina|evm.model.ctg019910_np12.6/R. ranina|evm.model.ctg130180_np12.1/R. ranina|evm.model.ctg000610_np12.1/R. ranina|evm.model.ctg123790_np12.1/R. ranina|evm.model.ctg075…	38
GO:0003384	GO:0003384	apical constriction involved in gastrulation	38/2895	49/10213	1.14231509389004e-12	1.6043180874189e-10	1.49391656236029e-10	R. ranina|evm.model.ctg127760_np12.2/R. ranina|evm.model.ctg143790_np12.2/R. ranina|evm.model.ctg024470_np12.13/R. ranina|evm.model.ctg019910_np12.40/R. ranina|evm.model.ctg167530_np12.10/R. ranina|evm.model.ctg095650_np12.1/R. ranina|evm.model.ctg019910_np12.6/R. ranina|evm.model.ctg130180_np12.1/R. ranina|evm.model.ctg000610_np12.1/R. ranina|evm.model.ctg123790_np12.1/R. ranina|evm.model.ctg075…	38
GO:1901607	GO:1901607	alpha-amino acid biosynthetic process	70/2895	119/10213	2.90607316127781e-12	4.0072107009329e-10	3.73145355770581e-10	R. ranina|evm.model.ctg119810_np12.7/R. ranina|evm.model.ctg038340_np12.35/R. ranina|evm.model.ctg123680_np12.58/R. ranina|evm.model.ctg106280_np12.9/R. ranina|evm.model.ctg066000_np12.1/R. ranina|evm.model.ctg117080_np12.13/R. ranina|evm.model.ctg134710_np12.40/R. ranina|evm.model.ctg157100_np12.5/R. ranina|evm.model.ctg165480_np12.16/R. ranina|evm.model.ctg051290_np12.1/R. ranina|evm.model.ctg0…	70
GO:0007156	GO:0007156	homophilic cell adhesion via plasma membrane adhesion molecules	84/2895	153/10213	3.63806203484933e-12	4.92697544148166e-10	4.58792447214364e-10	R. ranina|evm.model.ctg127760_np12.2/R. ranina|evm.model.ctg143790_np12.2/R. ranina|evm.model.ctg024470_np12.13/R. ranina|evm.model.ctg019910_np12.40/R. ranina|evm.model.ctg167530_np12.10/R. ranina|evm.model.ctg101500_np12.92/R. ranina|evm.model.ctg095650_np12.1/R. ranina|evm.model.ctg019910_np12.6/R. ranina|evm.model.ctg130180_np12.1/R. ranina|evm.model.ctg000610_np12.1/R. ranina|evm.model.ctg12…	84
GO:0045465	GO:0045465	R8 cell differentiation	44/2895	62/10213	3.73741439825117e-12	4.97272820988366e-10	4.63052875306871e-10	R. ranina|evm.model.ctg024470_np12.13/R. ranina|evm.model.ctg019910_np12.40/R. ranina|evm.model.ctg167530_np12.10/R. ranina|evm.model.ctg101500_np12.92/R. ranina|evm.model.ctg095650_np12.1/R. ranina|evm.model.ctg019910_np12.6/R. ranina|evm.model.ctg130180_np12.1/R. ranina|evm.model.ctg000610_np12.1/R. ranina|evm.model.ctg123790_np12.1/R. ranina|evm.model.ctg075370_np12.8/R. ranina|evm.model.ctg11…	44
GO:0045467	GO:0045467	R7 cell development	47/2895	69/10213	7.2432459672446e-12	9.47116851992811e-10	8.81940783924574e-10	R. ranina|evm.model.ctg024470_np12.13/R. ranina|evm.model.ctg019910_np12.40/R. ranina|evm.model.ctg167530_np12.10/R. ranina|evm.model.ctg101500_np12.92/R. ranina|evm.model.ctg095650_np12.1/R. ranina|evm.model.ctg019910_np12.6/R. ranina|evm.model.ctg130180_np12.1/R. ranina|evm.model.ctg000610_np12.1/R. ranina|evm.model.ctg123790_np12.1/R. ranina|evm.model.ctg075370_np12.8/R. ranina|evm.model.ctg11…	47
GO:0030866	GO:0030866	cortical actin cytoskeleton organization	84/2895	156/10213	1.44461093711671e-11	1.85693717747341e-09	1.72915161054701e-09	R. ranina|evm.model.ctg127760_np12.2/R. ranina|evm.model.ctg143790_np12.2/R. ranina|evm.model.ctg098620_np12.9/R. ranina|evm.model.ctg060680_np12.17/R. ranina|evm.model.ctg106050_np12.5/R. ranina|evm.model.ctg105830_np12.6/R. ranina|evm.model.ctg099850_np12.2/R. ranina|evm.model.ctg019700_np12.11/R. ranina|evm.model.ctg077690_np12.62/R. ranina|evm.model.ctg051530_np12.23/R. ranina|evm.model.ctg06…	84
GO:2000171	GO:2000171	negative regulation of dendrite development	46/2895	69/10213	3.8460237622608e-11	4.86137403549765e-09	4.52683744228205e-09	R. ranina|evm.model.ctg010560_np12.1/R. ranina|evm.model.ctg054770_np12.15/R. ranina|evm.model.ctg024470_np12.13/R. ranina|evm.model.ctg019910_np12.40/R. ranina|evm.model.ctg167530_np12.10/R. ranina|evm.model.ctg095650_np12.1/R. ranina|evm.model.ctg019910_np12.6/R. ranina|evm.model.ctg130180_np12.1/R. ranina|evm.model.ctg000610_np12.1/R. ranina|evm.model.ctg123790_np12.1/R. ranina|evm.model.ctg07…	46
GO:0030865	GO:0030865	cortical cytoskeleton organization	91/2895	176/10213	4.00698269701367e-11	4.98179619248388e-09	4.63897272032178e-09	R. ranina|evm.model.ctg127760_np12.2/R. ranina|evm.model.ctg143790_np12.2/R. ranina|evm.model.ctg098620_np12.9/R. ranina|evm.model.ctg060680_np12.17/R. ranina|evm.model.ctg106050_np12.5/R. ranina|evm.model.ctg105830_np12.6/R. ranina|evm.model.ctg099850_np12.2/R. ranina|evm.model.ctg019700_np12.11/R. ranina|evm.model.ctg077690_np12.62/R. ranina|evm.model.ctg051530_np12.23/R. ranina|evm.model.ctg06…	91
GO:0044214	GO:0044214	GO:0044214	33/2895	43/10213	5.96974218608343e-11	7.07414449050887e-09	6.58733558000555e-09	R. ranina|evm.model.ctg127760_np12.2/R. ranina|evm.model.ctg143790_np12.2/R. ranina|evm.model.ctg024470_np12.13/R. ranina|evm.model.ctg019910_np12.40/R. ranina|evm.model.ctg167530_np12.10/R. ranina|evm.model.ctg095650_np12.1/R. ranina|evm.model.ctg019910_np12.6/R. ranina|evm.model.ctg130180_np12.1/R. ranina|evm.model.ctg000610_np12.1/R. ranina|evm.model.ctg123790_np12.1/R. ranina|evm.model.ctg075…	33
GO:0070097	GO:0070097	delta-catenin binding	33/2895	43/10213	5.96974218608343e-11	7.07414449050887e-09	6.58733558000555e-09	R. ranina|evm.model.ctg127760_np12.2/R. ranina|evm.model.ctg143790_np12.2/R. ranina|evm.model.ctg024470_np12.13/R. ranina|evm.model.ctg019910_np12.40/R. ranina|evm.model.ctg167530_np12.10/R. ranina|evm.model.ctg095650_np12.1/R. ranina|evm.model.ctg019910_np12.6/R. ranina|evm.model.ctg130180_np12.1/R. ranina|evm.model.ctg000610_np12.1/R. ranina|evm.model.ctg123790_np12.1/R. ranina|evm.model.ctg075…	33
GO:0089717	GO:0089717	GO:0089717	33/2895	43/10213	5.96974218608343e-11	7.07414449050887e-09	6.58733558000555e-09	R. ranina|evm.model.ctg127760_np12.2/R. ranina|evm.model.ctg143790_np12.2/R. ranina|evm.model.ctg024470_np12.13/R. ranina|evm.model.ctg019910_np12.40/R. ranina|evm.model.ctg167530_np12.10/R. ranina|evm.model.ctg095650_np12.1/R. ranina|evm.model.ctg019910_np12.6/R. ranina|evm.model.ctg130180_np12.1/R. ranina|evm.model.ctg000610_np12.1/R. ranina|evm.model.ctg123790_np12.1/R. ranina|evm.model.ctg075…	33
GO:0042051	GO:0042051	compound eye photoreceptor development	80/2895	150/10213	8.32104231627227e-11	9.70873614255522e-09	9.04062719026246e-09	R. ranina|evm.model.ctg010560_np12.1/R. ranina|evm.model.ctg014670_np12.48/R. ranina|evm.model.ctg024470_np12.13/R. ranina|evm.model.ctg019910_np12.40/R. ranina|evm.model.ctg167530_np12.10/R. ranina|evm.model.ctg101500_np12.92/R. ranina|evm.model.ctg095650_np12.1/R. ranina|evm.model.ctg019910_np12.6/R. ranina|evm.model.ctg130180_np12.1/R. ranina|evm.model.ctg000610_np12.1/R. ranina|evm.model.ctg1…	80
GO:0003382	GO:0003382	epithelial cell morphogenesis	61/2895	106/10213	2.55843192978451e-10	2.93987087204329e-08	2.73756296920642e-08	R. ranina|evm.model.ctg127760_np12.2/R. ranina|evm.model.ctg143790_np12.2/R. ranina|evm.model.ctg024470_np12.13/R. ranina|evm.model.ctg019910_np12.40/R. ranina|evm.model.ctg167530_np12.10/R. ranina|evm.model.ctg095650_np12.1/R. ranina|evm.model.ctg019910_np12.6/R. ranina|evm.model.ctg130180_np12.1/R. ranina|evm.model.ctg000610_np12.1/R. ranina|evm.model.ctg123790_np12.1/R. ranina|evm.model.ctg075…	61
GO:0008652	GO:0008652	amino acid biosynthetic process	71/2895	131/10213	3.71003967633574e-10	4.19954341870601e-08	3.91055085444407e-08	R. ranina|evm.model.ctg119810_np12.7/R. ranina|evm.model.ctg038340_np12.35/R. ranina|evm.model.ctg123680_np12.58/R. ranina|evm.model.ctg106280_np12.9/R. ranina|evm.model.ctg066000_np12.1/R. ranina|evm.model.ctg117080_np12.13/R. ranina|evm.model.ctg134710_np12.40/R. ranina|evm.model.ctg157100_np12.5/R. ranina|evm.model.ctg165480_np12.16/R. ranina|evm.model.ctg051290_np12.1/R. ranina|evm.model.ctg0…	71
GO:0003383	GO:0003383	apical constriction	45/2895	70/10213	3.89830445532607e-10	4.30619509905586e-08	4.0098632744234e-08	R. ranina|evm.model.ctg127760_np12.2/R. ranina|evm.model.ctg143790_np12.2/R. ranina|evm.model.ctg024470_np12.13/R. ranina|evm.model.ctg019910_np12.40/R. ranina|evm.model.ctg167530_np12.10/R. ranina|evm.model.ctg095650_np12.1/R. ranina|evm.model.ctg019910_np12.6/R. ranina|evm.model.ctg130180_np12.1/R. ranina|evm.model.ctg000610_np12.1/R. ranina|evm.model.ctg123790_np12.1/R. ranina|evm.model.ctg075…	45
GO:0044550	GO:0044550	secondary metabolite biosynthetic process	56/2895	95/10213	3.91781990816e-10	4.30619509905586e-08	4.0098632744234e-08	R. ranina|evm.model.ctg129480_np12.5/R. ranina|evm.model.ctg014200_np12.18/R. ranina|evm.model.ctg119810_np12.7/R. ranina|evm.model.ctg062770_np12.4/R. ranina|evm.model.ctg038340_np12.35/R. ranina|evm.model.ctg123680_np12.58/R. ranina|evm.model.ctg106280_np12.9/R. ranina|evm.model.ctg066000_np12.1/R. ranina|evm.model.ctg117080_np12.13/R. ranina|evm.model.ctg134710_np12.40/R. ranina|evm.model.ctg1…	56
GO:0051959	GO:0051959	dynein light intermediate chain binding	37/2895	53/10213	4.22428503148343e-10	4.5767110969672e-08	4.26176365055975e-08	R. ranina|evm.model.ctg151730_np12.3/R. ranina|evm.model.ctg039930_np12.82/R. ranina|evm.model.ctg039930_np12.62/R. ranina|evm.model.ctg013950_np12.4/R. ranina|evm.model.ctg035270_np12.16/R. ranina|evm.model.ctg157610_np12.8/R. ranina|evm.model.ctg073430_np12.23/R. ranina|evm.model.ctg086370_np12.10/R. ranina|evm.model.ctg086890_np12.5/R. ranina|evm.model.ctg096050_np12.3/R. ranina|evm.model.ctg0…	37
GO:0016342	GO:0016342	catenin complex	36/2895	51/10213	4.45545356057468e-10	4.75917743709837e-08	4.43167352674508e-08	R. ranina|evm.model.ctg127760_np12.2/R. ranina|evm.model.ctg143790_np12.2/R. ranina|evm.model.ctg024470_np12.13/R. ranina|evm.model.ctg019910_np12.40/R. ranina|evm.model.ctg167530_np12.10/R. ranina|evm.model.ctg095650_np12.1/R. ranina|evm.model.ctg019910_np12.6/R. ranina|evm.model.ctg130180_np12.1/R. ranina|evm.model.ctg000610_np12.1/R. ranina|evm.model.ctg123790_np12.1/R. ranina|evm.model.ctg075…	36
GO:0019941	GO:0019941	modification-dependent protein catabolic process	181/2895	435/10213	9.35842932379538e-10	9.8575455543978e-08	9.17919624756479e-08	R. ranina|evm.model.ctg074660_np12.12/R. ranina|evm.model.ctg054290_np12.3/R. ranina|evm.model.ctg023530_np12.17/R. ranina|evm.model.ctg119060_np12.31/R. ranina|evm.model.ctg066760_np12.12/R. ranina|evm.model.ctg028650_np12.13/R. ranina|evm.model.ctg129040_np12.8/R. ranina|evm.model.ctg148060_np12.4/R. ranina|evm.model.ctg034480_np12.1/R. ranina|evm.model.ctg076690_np12.1/R. ranina|evm.model.ctg0…	181
GO:0042462	GO:0042462	eye photoreceptor cell development	93/2895	190/10213	1.09653827680968e-09	1.13919812209926e-07	1.06080393642627e-07	R. ranina|evm.model.ctg010560_np12.1/R. ranina|evm.model.ctg014670_np12.48/R. ranina|evm.model.ctg138560_np12.3/R. ranina|evm.model.ctg027160_np12.4/R. ranina|evm.model.ctg024470_np12.13/R. ranina|evm.model.ctg019910_np12.40/R. ranina|evm.model.ctg167530_np12.10/R. ranina|evm.model.ctg101500_np12.92/R. ranina|evm.model.ctg095650_np12.1/R. ranina|evm.model.ctg019910_np12.6/R. ranina|evm.model.ctg1…	93
GO:0032507	GO:0032507	maintenance of protein location in cell	72/2895	136/10213	1.12556853988635e-09	1.15355564952677e-07	1.07417344724005e-07	R. ranina|evm.model.ctg127760_np12.2/R. ranina|evm.model.ctg143790_np12.2/R. ranina|evm.model.ctg098620_np12.9/R. ranina|evm.model.ctg060680_np12.17/R. ranina|evm.model.ctg106050_np12.5/R. ranina|evm.model.ctg105830_np12.6/R. ranina|evm.model.ctg099850_np12.2/R. ranina|evm.model.ctg019700_np12.11/R. ranina|evm.model.ctg077690_np12.62/R. ranina|evm.model.ctg051530_np12.23/R. ranina|evm.model.ctg06…	72
GO:0008569	GO:0008569	minus-end-directed microtubule motor activity	33/2895	46/10213	1.22217500553953e-09	1.23586336560157e-07	1.15081713854943e-07	R. ranina|evm.model.ctg151730_np12.3/R. ranina|evm.model.ctg039930_np12.82/R. ranina|evm.model.ctg039930_np12.62/R. ranina|evm.model.ctg013950_np12.4/R. ranina|evm.model.ctg035270_np12.16/R. ranina|evm.model.ctg157610_np12.8/R. ranina|evm.model.ctg073430_np12.23/R. ranina|evm.model.ctg086370_np12.10/R. ranina|evm.model.ctg086890_np12.5/R. ranina|evm.model.ctg085330_np12.3/R. ranina|evm.model.ctg0…	33
GO:0006511	GO:0006511	ubiquitin-dependent protein catabolic process	179/2895	431/10213	1.38452808667493e-09	1.38161329070299e-07	1.2865372484075e-07	R. ranina|evm.model.ctg074660_np12.12/R. ranina|evm.model.ctg054290_np12.3/R. ranina|evm.model.ctg023530_np12.17/R. ranina|evm.model.ctg119060_np12.31/R. ranina|evm.model.ctg066760_np12.12/R. ranina|evm.model.ctg028650_np12.13/R. ranina|evm.model.ctg129040_np12.8/R. ranina|evm.model.ctg148060_np12.4/R. ranina|evm.model.ctg034480_np12.1/R. ranina|evm.model.ctg076690_np12.1/R. ranina|evm.model.ctg0…	179
GO:0032836	GO:0032836	glomerular basement membrane development	21/2895	24/10213	2.38641412992143e-09	2.35046295601612e-07	2.18871529701201e-07	R. ranina|evm.model.ctg079800_np12.1/R. ranina|evm.model.ctg088120_np12.16/R. ranina|evm.model.ctg011940_np12.108/R. ranina|evm.model.ctg103010_np12.34/R. ranina|evm.model.ctg156770_np12.6/R. ranina|evm.model.ctg118130_np12.4/R. ranina|evm.model.ctg065830_np12.44/R. ranina|evm.model.ctg084930_np12.1/R. ranina|evm.model.ctg107990_np12.58/R. ranina|evm.model.ctg045790_np12.10/R. ranina|evm.model.ct…	21
GO:0048846	GO:0048846	axon extension involved in axon guidance	35/2895	51/10213	2.60585566054578e-09	2.50162143412395e-07	2.3294717690342e-07	R. ranina|evm.model.ctg024470_np12.13/R. ranina|evm.model.ctg019910_np12.40/R. ranina|evm.model.ctg167530_np12.10/R. ranina|evm.model.ctg101500_np12.92/R. ranina|evm.model.ctg095650_np12.1/R. ranina|evm.model.ctg019910_np12.6/R. ranina|evm.model.ctg130180_np12.1/R. ranina|evm.model.ctg000610_np12.1/R. ranina|evm.model.ctg123790_np12.1/R. ranina|evm.model.ctg075370_np12.8/R. ranina|evm.model.ctg11…	35
GO:1902284	GO:1902284	neuron projection extension involved in neuron projection guidance	35/2895	51/10213	2.60585566054578e-09	2.50162143412395e-07	2.3294717690342e-07	R. ranina|evm.model.ctg024470_np12.13/R. ranina|evm.model.ctg019910_np12.40/R. ranina|evm.model.ctg167530_np12.10/R. ranina|evm.model.ctg101500_np12.92/R. ranina|evm.model.ctg095650_np12.1/R. ranina|evm.model.ctg019910_np12.6/R. ranina|evm.model.ctg130180_np12.1/R. ranina|evm.model.ctg000610_np12.1/R. ranina|evm.model.ctg123790_np12.1/R. ranina|evm.model.ctg075370_np12.8/R. ranina|evm.model.ctg11…	35
GO:0031566	GO:0031566	actomyosin contractile ring maturation	27/2895	35/10213	2.83443729943475e-09	2.65387314554484e-07	2.47124624326287e-07	R. ranina|evm.model.ctg098620_np12.9/R. ranina|evm.model.ctg060680_np12.17/R. ranina|evm.model.ctg106050_np12.5/R. ranina|evm.model.ctg105830_np12.6/R. ranina|evm.model.ctg099850_np12.2/R. ranina|evm.model.ctg019700_np12.11/R. ranina|evm.model.ctg077690_np12.62/R. ranina|evm.model.ctg051530_np12.23/R. ranina|evm.model.ctg068500_np12.1/R. ranina|evm.model.ctg046100_np12.1/R. ranina|evm.model.ctg05…	27
GO:0036212	GO:0036212	GO:0036212	27/2895	35/10213	2.83443729943475e-09	2.65387314554484e-07	2.47124624326287e-07	R. ranina|evm.model.ctg098620_np12.9/R. ranina|evm.model.ctg060680_np12.17/R. ranina|evm.model.ctg106050_np12.5/R. ranina|evm.model.ctg105830_np12.6/R. ranina|evm.model.ctg099850_np12.2/R. ranina|evm.model.ctg019700_np12.11/R. ranina|evm.model.ctg077690_np12.62/R. ranina|evm.model.ctg051530_np12.23/R. ranina|evm.model.ctg068500_np12.1/R. ranina|evm.model.ctg046100_np12.1/R. ranina|evm.model.ctg05…	27
GO:1990939	GO:1990939	GO:1990939	40/2895	62/10213	3.16380194159945e-09	2.92613096647442e-07	2.72476857845837e-07	R. ranina|evm.model.ctg151730_np12.3/R. ranina|evm.model.ctg039930_np12.82/R. ranina|evm.model.ctg039930_np12.62/R. ranina|evm.model.ctg013950_np12.4/R. ranina|evm.model.ctg035270_np12.16/R. ranina|evm.model.ctg067900_np12.29/R. ranina|evm.model.ctg157610_np12.8/R. ranina|evm.model.ctg073430_np12.23/R. ranina|evm.model.ctg086370_np12.10/R. ranina|evm.model.ctg086890_np12.5/R. ranina|evm.model.ctg…	40
GO:0050774	GO:0050774	negative regulation of dendrite morphogenesis	30/2895	41/10213	3.25112355698889e-09	2.97066518749443e-07	2.76623816662504e-07	R. ranina|evm.model.ctg010560_np12.1/R. ranina|evm.model.ctg024470_np12.13/R. ranina|evm.model.ctg019910_np12.40/R. ranina|evm.model.ctg167530_np12.10/R. ranina|evm.model.ctg095650_np12.1/R. ranina|evm.model.ctg019910_np12.6/R. ranina|evm.model.ctg130180_np12.1/R. ranina|evm.model.ctg000610_np12.1/R. ranina|evm.model.ctg123790_np12.1/R. ranina|evm.model.ctg075370_np12.8/R. ranina|evm.model.ctg112…	30
GO:0042067	GO:0042067	establishment of ommatidial planar polarity	65/2895	122/10213	5.15033394037619e-09	4.65001578616822e-07	4.33002386039898e-07	R. ranina|evm.model.ctg071890_np12.1/R. ranina|evm.model.ctg024470_np12.13/R. ranina|evm.model.ctg019910_np12.40/R. ranina|evm.model.ctg167530_np12.10/R. ranina|evm.model.ctg101500_np12.92/R. ranina|evm.model.ctg095650_np12.1/R. ranina|evm.model.ctg019910_np12.6/R. ranina|evm.model.ctg130180_np12.1/R. ranina|evm.model.ctg000610_np12.1/R. ranina|evm.model.ctg123790_np12.1/R. ranina|evm.model.ctg07…	65
GO:0007412	GO:0007412	axon target recognition	33/2895	48/10213	6.96140103542403e-09	6.21120770031245e-07	5.78378198720245e-07	R. ranina|evm.model.ctg070910_np12.7/R. ranina|evm.model.ctg024470_np12.13/R. ranina|evm.model.ctg019910_np12.40/R. ranina|evm.model.ctg167530_np12.10/R. ranina|evm.model.ctg095650_np12.1/R. ranina|evm.model.ctg019910_np12.6/R. ranina|evm.model.ctg130180_np12.1/R. ranina|evm.model.ctg000610_np12.1/R. ranina|evm.model.ctg123790_np12.1/R. ranina|evm.model.ctg075370_np12.8/R. ranina|evm.model.ctg112…	33
GO:0072015	GO:0072015	podocyte development	25/2895	32/10213	7.05311586405696e-09	6.21986403639628e-07	5.7918426354906e-07	R. ranina|evm.model.ctg079800_np12.1/R. ranina|evm.model.ctg092850_np12.61/R. ranina|evm.model.ctg088120_np12.16/R. ranina|evm.model.ctg011940_np12.108/R. ranina|evm.model.ctg103010_np12.34/R. ranina|evm.model.ctg156770_np12.6/R. ranina|evm.model.ctg118130_np12.4/R. ranina|evm.model.ctg065830_np12.44/R. ranina|evm.model.ctg084930_np12.1/R. ranina|evm.model.ctg107990_np12.58/R. ranina|evm.model.ct…	25
GO:0045466	GO:0045466	R7 cell differentiation	57/2895	103/10213	7.24270713349027e-09	6.31364263222876e-07	5.87916783527964e-07	R. ranina|evm.model.ctg108960_np12.43/R. ranina|evm.model.ctg024470_np12.13/R. ranina|evm.model.ctg019910_np12.40/R. ranina|evm.model.ctg167530_np12.10/R. ranina|evm.model.ctg101500_np12.92/R. ranina|evm.model.ctg095650_np12.1/R. ranina|evm.model.ctg019910_np12.6/R. ranina|evm.model.ctg130180_np12.1/R. ranina|evm.model.ctg000610_np12.1/R. ranina|evm.model.ctg123790_np12.1/R. ranina|evm.model.ctg0…	57
GO:0045185	GO:0045185	maintenance of protein location	81/2895	164/10213	7.68496533711231e-09	6.60689196704899e-07	6.15223714841934e-07	R. ranina|evm.model.ctg127760_np12.2/R. ranina|evm.model.ctg143790_np12.2/R. ranina|evm.model.ctg098620_np12.9/R. ranina|evm.model.ctg060680_np12.17/R. ranina|evm.model.ctg106050_np12.5/R. ranina|evm.model.ctg105830_np12.6/R. ranina|evm.model.ctg099850_np12.2/R. ranina|evm.model.ctg019700_np12.11/R. ranina|evm.model.ctg077690_np12.62/R. ranina|evm.model.ctg051530_np12.23/R. ranina|evm.model.ctg06…	81
GO:0072112	GO:0072112	podocyte differentiation	26/2895	34/10213	7.79289858099057e-09	6.60689196704899e-07	6.15223714841934e-07	R. ranina|evm.model.ctg079800_np12.1/R. ranina|evm.model.ctg092850_np12.61/R. ranina|evm.model.ctg088120_np12.16/R. ranina|evm.model.ctg011940_np12.108/R. ranina|evm.model.ctg103010_np12.34/R. ranina|evm.model.ctg156770_np12.6/R. ranina|evm.model.ctg118130_np12.4/R. ranina|evm.model.ctg065830_np12.44/R. ranina|evm.model.ctg084930_np12.1/R. ranina|evm.model.ctg107990_np12.58/R. ranina|evm.model.ct…	26
GO:0051536	GO:0051536	iron-sulfur cluster binding	65/2895	123/10213	7.92757343092640e-09	6.60689196704899e-07	6.15223714841934e-07	R. ranina|evm.model.ctg119810_np12.7/R. ranina|evm.model.ctg068270_np12.1/R. ranina|evm.model.ctg096350_np12.5/R. ranina|evm.model.ctg038340_np12.35/R. ranina|evm.model.ctg123680_np12.58/R. ranina|evm.model.ctg106280_np12.9/R. ranina|evm.model.ctg066000_np12.1/R. ranina|evm.model.ctg117080_np12.13/R. ranina|evm.model.ctg134710_np12.40/R. ranina|evm.model.ctg157100_np12.5/R. ranina|evm.model.ctg16…	65
GO:0051540	GO:0051540	metal cluster binding	65/2895	123/10213	7.92757343092640e-09	6.60689196704899e-07	6.15223714841934e-07	R. ranina|evm.model.ctg119810_np12.7/R. ranina|evm.model.ctg068270_np12.1/R. ranina|evm.model.ctg096350_np12.5/R. ranina|evm.model.ctg038340_np12.35/R. ranina|evm.model.ctg123680_np12.58/R. ranina|evm.model.ctg106280_np12.9/R. ranina|evm.model.ctg066000_np12.1/R. ranina|evm.model.ctg117080_np12.13/R. ranina|evm.model.ctg134710_np12.40/R. ranina|evm.model.ctg157100_np12.5/R. ranina|evm.model.ctg16…	65
GO:0009507	GO:0009507	chloroplast	77/2895	154/10213	9.00384125361695e-09	7.34248731907859e-07	6.83721233395768e-07	R. ranina|evm.model.ctg119810_np12.7/R. ranina|evm.model.ctg052190_np12.4/R. ranina|evm.model.ctg065570_np12.3/R. ranina|evm.model.ctg038340_np12.35/R. ranina|evm.model.ctg123680_np12.58/R. ranina|evm.model.ctg106280_np12.9/R. ranina|evm.model.ctg066000_np12.1/R. ranina|evm.model.ctg117080_np12.13/R. ranina|evm.model.ctg134710_np12.40/R. ranina|evm.model.ctg157100_np12.5/R. ranina|evm.model.ctg16…	77
GO:0009536	GO:0009536	plastid	77/2895	154/10213	9.00384125361695e-09	7.34248731907859e-07	6.83721233395768e-07	R. ranina|evm.model.ctg119810_np12.7/R. ranina|evm.model.ctg052190_np12.4/R. ranina|evm.model.ctg065570_np12.3/R. ranina|evm.model.ctg038340_np12.35/R. ranina|evm.model.ctg123680_np12.58/R. ranina|evm.model.ctg106280_np12.9/R. ranina|evm.model.ctg066000_np12.1/R. ranina|evm.model.ctg117080_np12.13/R. ranina|evm.model.ctg134710_np12.40/R. ranina|evm.model.ctg157100_np12.5/R. ranina|evm.model.ctg16…	77
GO:0007016	GO:0007016	GO:0007016	48/2895	82/10213	9.62824285847824e-09	7.76814828071266e-07	7.23358133678953e-07	R. ranina|evm.model.ctg127760_np12.2/R. ranina|evm.model.ctg143790_np12.2/R. ranina|evm.model.ctg098620_np12.9/R. ranina|evm.model.ctg060680_np12.17/R. ranina|evm.model.ctg106050_np12.5/R. ranina|evm.model.ctg105830_np12.6/R. ranina|evm.model.ctg099850_np12.2/R. ranina|evm.model.ctg019700_np12.11/R. ranina|evm.model.ctg077690_np12.62/R. ranina|evm.model.ctg051530_np12.23/R. ranina|evm.model.ctg06…	48
GO:0046686	GO:0046686	response to cadmium ion	64/2895	121/10213	9.8565930232183e-09	7.86867384085133e-07	7.3271892069553e-07	R. ranina|evm.model.ctg028650_np12.13/R. ranina|evm.model.ctg119810_np12.7/R. ranina|evm.model.ctg162630_np12.1/R. ranina|evm.model.ctg154590_np12.5/R. ranina|evm.model.ctg021870_np12.2/R. ranina|evm.model.ctg151710_np12.7/R. ranina|evm.model.ctg038340_np12.35/R. ranina|evm.model.ctg123680_np12.58/R. ranina|evm.model.ctg106280_np12.9/R. ranina|evm.model.ctg066000_np12.1/R. ranina|evm.model.ctg117…	64
GO:0051603	GO:0051603	proteolysis involved in protein catabolic process	191/2895	476/10213	1.00243639612156e-08	7.91924752936035e-07	7.37428265524075e-07	R. ranina|evm.model.ctg074660_np12.12/R. ranina|evm.model.ctg054290_np12.3/R. ranina|evm.model.ctg023530_np12.17/R. ranina|evm.model.ctg119060_np12.31/R. ranina|evm.model.ctg066760_np12.12/R. ranina|evm.model.ctg028650_np12.13/R. ranina|evm.model.ctg129040_np12.8/R. ranina|evm.model.ctg148060_np12.4/R. ranina|evm.model.ctg034480_np12.1/R. ranina|evm.model.ctg076690_np12.1/R. ranina|evm.model.ctg0…	191
GO:0044257	GO:0044257	GO:0044257	196/2895	491/10213	1.03140299094044e-08	8.06408276628074e-07	7.50915102139927e-07	R. ranina|evm.model.ctg074660_np12.12/R. ranina|evm.model.ctg054290_np12.3/R. ranina|evm.model.ctg023530_np12.17/R. ranina|evm.model.ctg119060_np12.31/R. ranina|evm.model.ctg066760_np12.12/R. ranina|evm.model.ctg028650_np12.13/R. ranina|evm.model.ctg129040_np12.8/R. ranina|evm.model.ctg148060_np12.4/R. ranina|evm.model.ctg034480_np12.1/R. ranina|evm.model.ctg076690_np12.1/R. ranina|evm.model.ctg0…	196
GO:0043632	GO:0043632	modification-dependent macromolecule catabolic process	182/2895	452/10213	1.67294499896942e-08	1.29465457879429e-06	1.2055626206322e-06	R. ranina|evm.model.ctg074660_np12.12/R. ranina|evm.model.ctg054290_np12.3/R. ranina|evm.model.ctg023530_np12.17/R. ranina|evm.model.ctg119060_np12.31/R. ranina|evm.model.ctg066760_np12.12/R. ranina|evm.model.ctg028650_np12.13/R. ranina|evm.model.ctg129040_np12.8/R. ranina|evm.model.ctg148060_np12.4/R. ranina|evm.model.ctg034480_np12.1/R. ranina|evm.model.ctg076690_np12.1/R. ranina|evm.model.ctg0…	182
GO:0016836	GO:0016836	hydro-lyase activity	52/2895	93/10213	2.0573964385811e-08	1.56041850481902e-06	1.45303793982217e-06	R. ranina|evm.model.ctg119810_np12.7/R. ranina|evm.model.ctg118710_np12.45/R. ranina|evm.model.ctg096350_np12.5/R. ranina|evm.model.ctg038340_np12.35/R. ranina|evm.model.ctg123680_np12.58/R. ranina|evm.model.ctg106280_np12.9/R. ranina|evm.model.ctg066000_np12.1/R. ranina|evm.model.ctg117080_np12.13/R. ranina|evm.model.ctg134710_np12.40/R. ranina|evm.model.ctg157100_np12.5/R. ranina|evm.model.ctg1…	52
GO:0045296	GO:0045296	cadherin binding	44/2895	74/10213	2.0575138512909e-08	1.56041850481902e-06	1.45303793982217e-06	R. ranina|evm.model.ctg054770_np12.15/R. ranina|evm.model.ctg024470_np12.13/R. ranina|evm.model.ctg019910_np12.40/R. ranina|evm.model.ctg167530_np12.10/R. ranina|evm.model.ctg095650_np12.1/R. ranina|evm.model.ctg019910_np12.6/R. ranina|evm.model.ctg130180_np12.1/R. ranina|evm.model.ctg000610_np12.1/R. ranina|evm.model.ctg123790_np12.1/R. ranina|evm.model.ctg075370_np12.8/R. ranina|evm.model.ctg11…	44
GO:0072310	GO:0072310	glomerular epithelial cell development	25/2895	33/10213	2.12411114525716e-08	1.59497613125052e-06	1.48521747509435e-06	R. ranina|evm.model.ctg079800_np12.1/R. ranina|evm.model.ctg092850_np12.61/R. ranina|evm.model.ctg088120_np12.16/R. ranina|evm.model.ctg011940_np12.108/R. ranina|evm.model.ctg103010_np12.34/R. ranina|evm.model.ctg156770_np12.6/R. ranina|evm.model.ctg118130_np12.4/R. ranina|evm.model.ctg065830_np12.44/R. ranina|evm.model.ctg084930_np12.1/R. ranina|evm.model.ctg107990_np12.58/R. ranina|evm.model.ct…	25
GO:0072311	GO:0072311	glomerular epithelial cell differentiation	26/2895	35/10213	2.21173422832627e-08	1.6444894497673e-06	1.531323522997e-06	R. ranina|evm.model.ctg079800_np12.1/R. ranina|evm.model.ctg092850_np12.61/R. ranina|evm.model.ctg088120_np12.16/R. ranina|evm.model.ctg011940_np12.108/R. ranina|evm.model.ctg103010_np12.34/R. ranina|evm.model.ctg156770_np12.6/R. ranina|evm.model.ctg118130_np12.4/R. ranina|evm.model.ctg065830_np12.44/R. ranina|evm.model.ctg084930_np12.1/R. ranina|evm.model.ctg107990_np12.58/R. ranina|evm.model.ct…	26
GO:0016318	GO:0016318	ommatidial rotation	45/2895	78/10213	5.12763003432214e-08	3.73922559425953e-06	3.48190990893393e-06	R. ranina|evm.model.ctg071890_np12.1/R. ranina|evm.model.ctg024470_np12.13/R. ranina|evm.model.ctg019910_np12.40/R. ranina|evm.model.ctg167530_np12.10/R. ranina|evm.model.ctg101500_np12.92/R. ranina|evm.model.ctg095650_np12.1/R. ranina|evm.model.ctg019910_np12.6/R. ranina|evm.model.ctg130180_np12.1/R. ranina|evm.model.ctg000610_np12.1/R. ranina|evm.model.ctg123790_np12.1/R. ranina|evm.model.ctg07…	45
GO:0042074	GO:0042074	cell migration involved in gastrulation	45/2895	78/10213	5.12763003432214e-08	3.73922559425953e-06	3.48190990893393e-06	R. ranina|evm.model.ctg127760_np12.2/R. ranina|evm.model.ctg143790_np12.2/R. ranina|evm.model.ctg024470_np12.13/R. ranina|evm.model.ctg019910_np12.40/R. ranina|evm.model.ctg167530_np12.10/R. ranina|evm.model.ctg095650_np12.1/R. ranina|evm.model.ctg019910_np12.6/R. ranina|evm.model.ctg130180_np12.1/R. ranina|evm.model.ctg000610_np12.1/R. ranina|evm.model.ctg123790_np12.1/R. ranina|evm.model.ctg075…	45
GO:0072010	GO:0072010	glomerular epithelium development	26/2895	36/10213	5.81205606532454e-08	4.19796506661156e-06	3.90908111701878e-06	R. ranina|evm.model.ctg079800_np12.1/R. ranina|evm.model.ctg092850_np12.61/R. ranina|evm.model.ctg088120_np12.16/R. ranina|evm.model.ctg011940_np12.108/R. ranina|evm.model.ctg103010_np12.34/R. ranina|evm.model.ctg156770_np12.6/R. ranina|evm.model.ctg118130_np12.4/R. ranina|evm.model.ctg065830_np12.44/R. ranina|evm.model.ctg084930_np12.1/R. ranina|evm.model.ctg107990_np12.58/R. ranina|evm.model.ct…	26
GO:0051861	GO:0051861	glycolipid binding	18/2895	21/10213	7.03752158353762e-08	5.03514751788201e-06	4.68865266176305e-06	R. ranina|evm.model.ctg079800_np12.1/R. ranina|evm.model.ctg088120_np12.16/R. ranina|evm.model.ctg006740_np12.3/R. ranina|evm.model.ctg155210_np12.16/R. ranina|evm.model.ctg070440_np12.68/R. ranina|evm.model.ctg095200_np12.36/R. ranina|evm.model.ctg088010_np12.1/R. ranina|evm.model.ctg065060_np12.5/R. ranina|evm.model.ctg006740_np12.15/R. ranina|evm.model.ctg017750_np12.1/R. ranina|evm.model.ctg0…	18
GO:0043208	GO:0043208	glycosphingolipid binding	13/2895	13/10213	7.48235304861393e-08	5.30337995520449e-06	4.93842662106747e-06	R. ranina|evm.model.ctg079800_np12.1/R. ranina|evm.model.ctg088120_np12.16/R. ranina|evm.model.ctg006740_np12.3/R. ranina|evm.model.ctg070440_np12.68/R. ranina|evm.model.ctg095200_np12.36/R. ranina|evm.model.ctg088010_np12.1/R. ranina|evm.model.ctg065060_np12.5/R. ranina|evm.model.ctg006740_np12.15/R. ranina|evm.model.ctg017750_np12.1/R. ranina|evm.model.ctg006740_np12.5/R. ranina|evm.model.ctg04…	13
GO:0051651	GO:0051651	maintenance of location in cell	78/2895	163/10213	8.24094440256636e-08	5.78697429157993e-06	5.38874229988477e-06	R. ranina|evm.model.ctg127760_np12.2/R. ranina|evm.model.ctg143790_np12.2/R. ranina|evm.model.ctg098620_np12.9/R. ranina|evm.model.ctg060680_np12.17/R. ranina|evm.model.ctg106050_np12.5/R. ranina|evm.model.ctg105830_np12.6/R. ranina|evm.model.ctg099850_np12.2/R. ranina|evm.model.ctg019700_np12.11/R. ranina|evm.model.ctg077690_np12.62/R. ranina|evm.model.ctg051530_np12.23/R. ranina|evm.model.ctg06…	78
GO:0019748	GO:0019748	secondary metabolic process	82/2895	174/10213	8.99209245246649e-08	6.25651643665191e-06	5.82597279223541e-06	R. ranina|evm.model.ctg010560_np12.1/R. ranina|evm.model.ctg157490_np12.5/R. ranina|evm.model.ctg129480_np12.5/R. ranina|evm.model.ctg014200_np12.18/R. ranina|evm.model.ctg119810_np12.7/R. ranina|evm.model.ctg020810_np12.38/R. ranina|evm.model.ctg154590_np12.5/R. ranina|evm.model.ctg070450_np12.5/R. ranina|evm.model.ctg062770_np12.4/R. ranina|evm.model.ctg159950_np12.73/R. ranina|evm.model.ctg038…	82
GO:0031290	GO:0031290	retinal ganglion cell axon guidance	42/2895	72/10213	9.25269139840993e-08	6.3793101423219e-06	5.9403164202806e-06	R. ranina|evm.model.ctg024470_np12.13/R. ranina|evm.model.ctg019910_np12.40/R. ranina|evm.model.ctg167530_np12.10/R. ranina|evm.model.ctg095650_np12.1/R. ranina|evm.model.ctg019910_np12.6/R. ranina|evm.model.ctg130180_np12.1/R. ranina|evm.model.ctg000610_np12.1/R. ranina|evm.model.ctg123790_np12.1/R. ranina|evm.model.ctg075370_np12.8/R. ranina|evm.model.ctg112980_np12.6/R. ranina|evm.model.ctg002…	42
GO:0016853	GO:0016853	isomerase activity	86/2895	185/10213	9.49924208264237e-08	6.49029296889727e-06	6.04366193764321e-06	R. ranina|evm.model.ctg119810_np12.7/R. ranina|evm.model.ctg130380_np12.2/R. ranina|evm.model.ctg020630_np12.25/R. ranina|evm.model.ctg007830_np12.27/R. ranina|evm.model.ctg038340_np12.35/R. ranina|evm.model.ctg123680_np12.58/R. ranina|evm.model.ctg105530_np12.183/R. ranina|evm.model.ctg106280_np12.9/R. ranina|evm.model.ctg066000_np12.1/R. ranina|evm.model.ctg117080_np12.13/R. ranina|evm.model.ct…	86
GO:0015081	GO:0015081	sodium ion transmembrane transporter activity	76/2895	159/10213	1.27764796172935e-07	8.57493994845611e-06	7.98485344689541e-06	R. ranina|evm.model.ctg166350_np12.13/R. ranina|evm.model.ctg082860_np12.6/R. ranina|evm.model.ctg061900_np12.5/R. ranina|evm.model.ctg020530_np12.17/R. ranina|evm.model.ctg163670_np12.27/R. ranina|evm.model.ctg099580_np12.13/R. ranina|evm.model.ctg164830_np12.3/R. ranina|evm.model.ctg071190_np12.1/R. ranina|evm.model.ctg032900_np12.161/R. ranina|evm.model.ctg104860_np12.5/R. ranina|evm.model.ctg…	76
GO:0035725	GO:0035725	sodium ion transmembrane transport	76/2895	159/10213	1.27764796172935e-07	8.57493994845611e-06	7.98485344689541e-06	R. ranina|evm.model.ctg166350_np12.13/R. ranina|evm.model.ctg082860_np12.6/R. ranina|evm.model.ctg061900_np12.5/R. ranina|evm.model.ctg020530_np12.17/R. ranina|evm.model.ctg163670_np12.27/R. ranina|evm.model.ctg099580_np12.13/R. ranina|evm.model.ctg164830_np12.3/R. ranina|evm.model.ctg071190_np12.1/R. ranina|evm.model.ctg032900_np12.161/R. ranina|evm.model.ctg104860_np12.5/R. ranina|evm.model.ctg…	76
GO:0070252	GO:0070252	actin-mediated cell contraction	60/2895	118/10213	1.81413475794969e-07	1.20687701792021e-05	1.12382549317493e-05	R. ranina|evm.model.ctg127760_np12.2/R. ranina|evm.model.ctg143790_np12.2/R. ranina|evm.model.ctg024470_np12.13/R. ranina|evm.model.ctg019910_np12.40/R. ranina|evm.model.ctg167530_np12.10/R. ranina|evm.model.ctg095650_np12.1/R. ranina|evm.model.ctg019910_np12.6/R. ranina|evm.model.ctg130180_np12.1/R. ranina|evm.model.ctg000610_np12.1/R. ranina|evm.model.ctg123790_np12.1/R. ranina|evm.model.ctg075…	60
GO:0048841	GO:0048841	regulation of axon extension involved in axon guidance	41/2895	71/10213	1.93454716330864e-07	1.27579179882893e-05	1.18799788728949e-05	R. ranina|evm.model.ctg054770_np12.15/R. ranina|evm.model.ctg024470_np12.13/R. ranina|evm.model.ctg019910_np12.40/R. ranina|evm.model.ctg167530_np12.10/R. ranina|evm.model.ctg095650_np12.1/R. ranina|evm.model.ctg019910_np12.6/R. ranina|evm.model.ctg130180_np12.1/R. ranina|evm.model.ctg000610_np12.1/R. ranina|evm.model.ctg123790_np12.1/R. ranina|evm.model.ctg075370_np12.8/R. ranina|evm.model.ctg11…	41
GO:0042461	GO:0042461	photoreceptor cell development	97/2895	218/10213	2.04853698755462e-07	1.33931935462192e-05	1.24715377944682e-05	R. ranina|evm.model.ctg010560_np12.1/R. ranina|evm.model.ctg014670_np12.48/R. ranina|evm.model.ctg138560_np12.3/R. ranina|evm.model.ctg130380_np12.2/R. ranina|evm.model.ctg027160_np12.4/R. ranina|evm.model.ctg024470_np12.13/R. ranina|evm.model.ctg019910_np12.40/R. ranina|evm.model.ctg167530_np12.10/R. ranina|evm.model.ctg101500_np12.92/R. ranina|evm.model.ctg095650_np12.1/R. ranina|evm.model.ctg0…	97
GO:0003958	GO:0003958	NADPH-hemoprotein reductase activity	12/2895	12/10213	2.64750202736423e-07	1.70356205584813e-05	1.58633103385036e-05	R. ranina|evm.model.ctg041710_np12.2/R. ranina|evm.model.ctg005080_np12.133/R. ranina|evm.model.ctg080860_np12.41/R. ranina|evm.model.ctg118690_np12.4/R. ranina|evm.model.ctg102980_np12.20/R. ranina|evm.model.ctg087400_np12.2/R. ranina|evm.model.ctg093940_np12.19/R. ranina|evm.model.ctg009420_np12.18/R. ranina|evm.model.ctg007590_np12.46/R. ranina|evm.model.ctg157960_np12.46/R. ranina|evm.model.c…	12
GO:0001751	GO:0001751	compound eye photoreceptor cell differentiation	102/2895	233/10213	2.65058442233754e-07	1.70356205584813e-05	1.58633103385036e-05	R. ranina|evm.model.ctg010560_np12.1/R. ranina|evm.model.ctg014670_np12.48/R. ranina|evm.model.ctg108960_np12.43/R. ranina|evm.model.ctg024470_np12.13/R. ranina|evm.model.ctg019910_np12.40/R. ranina|evm.model.ctg167530_np12.10/R. ranina|evm.model.ctg101500_np12.92/R. ranina|evm.model.ctg095650_np12.1/R. ranina|evm.model.ctg019910_np12.6/R. ranina|evm.model.ctg130180_np12.1/R. ranina|evm.model.ctg…	102
GO:0036057	GO:0036057	slit diaphragm	18/2895	22/10213	2.8388102672272e-07	1.79412808888759e-05	1.67066474410766e-05	R. ranina|evm.model.ctg011940_np12.108/R. ranina|evm.model.ctg103010_np12.34/R. ranina|evm.model.ctg156770_np12.6/R. ranina|evm.model.ctg118130_np12.4/R. ranina|evm.model.ctg065830_np12.44/R. ranina|evm.model.ctg084930_np12.1/R. ranina|evm.model.ctg107990_np12.58/R. ranina|evm.model.ctg045790_np12.10/R. ranina|evm.model.ctg024500_np12.132/R. ranina|evm.model.ctg009160_np12.2/R. ranina|evm.model.c…	18
GO:1901611	GO:1901611	phosphatidylglycerol binding	18/2895	22/10213	2.8388102672272e-07	1.79412808888759e-05	1.67066474410766e-05	R. ranina|evm.model.ctg130380_np12.2/R. ranina|evm.model.ctg075220_np12.80/R. ranina|evm.model.ctg103650_np12.14/R. ranina|evm.model.ctg164120_np12.47/R. ranina|evm.model.ctg166950_np12.4/R. ranina|evm.model.ctg122210_np12.103/R. ranina|evm.model.ctg153230_np12.94/R. ranina|evm.model.ctg067280_np12.196/R. ranina|evm.model.ctg161210_np12.21/R. ranina|evm.model.ctg023930_np12.2/R. ranina|evm.model.…	18
GO:0045505	GO:0045505	dynein intermediate chain binding	35/2895	58/10213	3.4682558924575e-07	2.17382253623122e-05	2.02423042909938e-05	R. ranina|evm.model.ctg151730_np12.3/R. ranina|evm.model.ctg039930_np12.82/R. ranina|evm.model.ctg039930_np12.62/R. ranina|evm.model.ctg013950_np12.4/R. ranina|evm.model.ctg035270_np12.16/R. ranina|evm.model.ctg157610_np12.8/R. ranina|evm.model.ctg073430_np12.23/R. ranina|evm.model.ctg086370_np12.10/R. ranina|evm.model.ctg086890_np12.5/R. ranina|evm.model.ctg085330_np12.3/R. ranina|evm.model.ctg0…	35
GO:0030286	GO:0030286	dynein complex	40/2895	70/10213	4.004945063086e-07	2.4896314228233e-05	2.31830685317032e-05	R. ranina|evm.model.ctg151730_np12.3/R. ranina|evm.model.ctg039930_np12.82/R. ranina|evm.model.ctg039930_np12.62/R. ranina|evm.model.ctg013950_np12.4/R. ranina|evm.model.ctg035270_np12.16/R. ranina|evm.model.ctg157610_np12.8/R. ranina|evm.model.ctg073430_np12.23/R. ranina|evm.model.ctg086370_np12.10/R. ranina|evm.model.ctg086890_np12.5/R. ranina|evm.model.ctg096050_np12.3/R. ranina|evm.model.ctg0…	40
GO:0004012	GO:0004012	GO:0004012	15/2895	17/10213	4.3926250817062e-07	2.70842834306177e-05	2.52204721208104e-05	R. ranina|evm.model.ctg130250_np12.2/R. ranina|evm.model.ctg057820_np12.10/R. ranina|evm.model.ctg022530_np12.9/R. ranina|evm.model.ctg166950_np12.4/R. ranina|evm.model.ctg107260_np12.1/R. ranina|evm.model.ctg138590_np12.30/R. ranina|evm.model.ctg156490_np12.3/R. ranina|evm.model.ctg072350_np12.3/R. ranina|evm.model.ctg098730_np12.7/R. ranina|evm.model.ctg098730_np12.8/R. ranina|evm.model.ctg0723…	15
GO:0001754	GO:0001754	eye photoreceptor cell differentiation	120/2895	287/10213	4.9155782046693e-07	2.99754588067263e-05	2.79126905860435e-05	R. ranina|evm.model.ctg010560_np12.1/R. ranina|evm.model.ctg014670_np12.48/R. ranina|evm.model.ctg108960_np12.43/R. ranina|evm.model.ctg138560_np12.3/R. ranina|evm.model.ctg027160_np12.4/R. ranina|evm.model.ctg024470_np12.13/R. ranina|evm.model.ctg019910_np12.40/R. ranina|evm.model.ctg167530_np12.10/R. ranina|evm.model.ctg101500_np12.92/R. ranina|evm.model.ctg095650_np12.1/R. ranina|evm.model.ctg…	120
GO:0051235	GO:0051235	maintenance of location	112/2895	264/10213	4.9469533396114e-07	2.99754588067263e-05	2.79126905860435e-05	R. ranina|evm.model.ctg127760_np12.2/R. ranina|evm.model.ctg143790_np12.2/R. ranina|evm.model.ctg128150_np12.14/R. ranina|evm.model.ctg098620_np12.9/R. ranina|evm.model.ctg060680_np12.17/R. ranina|evm.model.ctg106050_np12.5/R. ranina|evm.model.ctg105830_np12.6/R. ranina|evm.model.ctg099850_np12.2/R. ranina|evm.model.ctg019700_np12.11/R. ranina|evm.model.ctg077690_np12.62/R. ranina|evm.model.ctg05…	112
GO:0001738	GO:0001738	morphogenesis of a polarized epithelium	94/2895	213/10213	4.98009995997826e-07	2.99754588067263e-05	2.79126905860435e-05	R. ranina|evm.model.ctg071890_np12.1/R. ranina|evm.model.ctg047730_np12.2/R. ranina|evm.model.ctg024470_np12.13/R. ranina|evm.model.ctg019910_np12.40/R. ranina|evm.model.ctg167530_np12.10/R. ranina|evm.model.ctg101500_np12.92/R. ranina|evm.model.ctg095650_np12.1/R. ranina|evm.model.ctg019910_np12.6/R. ranina|evm.model.ctg130180_np12.1/R. ranina|evm.model.ctg000610_np12.1/R. ranina|evm.model.ctg12…	94
GO:0048588	GO:0048588	developmental cell growth	101/2895	233/10213	5.35701827955874e-07	3.19902571906878e-05	2.97888401471692e-05	R. ranina|evm.model.ctg023530_np12.17/R. ranina|evm.model.ctg079800_np12.1/R. ranina|evm.model.ctg024470_np12.13/R. ranina|evm.model.ctg019910_np12.40/R. ranina|evm.model.ctg167530_np12.10/R. ranina|evm.model.ctg101500_np12.92/R. ranina|evm.model.ctg095650_np12.1/R. ranina|evm.model.ctg019910_np12.6/R. ranina|evm.model.ctg130180_np12.1/R. ranina|evm.model.ctg000610_np12.1/R. ranina|evm.model.ctg1…	101
GO:1901657	GO:1901657	glycosyl compound metabolic process	76/2895	164/10213	6.1044446431773e-07	3.61688345108255e-05	3.367986769003e-05	R. ranina|evm.model.ctg051860_np12.17/R. ranina|evm.model.ctg129480_np12.5/R. ranina|evm.model.ctg167020_np12.13/R. ranina|evm.model.ctg119810_np12.7/R. ranina|evm.model.ctg092850_np12.61/R. ranina|evm.model.ctg038340_np12.35/R. ranina|evm.model.ctg123680_np12.58/R. ranina|evm.model.ctg106280_np12.9/R. ranina|evm.model.ctg066000_np12.1/R. ranina|evm.model.ctg117080_np12.13/R. ranina|evm.model.ctg…	76
GO:0070732	GO:0070732	spindle envelope	16/2895	19/10213	6.4780334093781e-07	3.80848103695531e-05	3.54639952211487e-05	R. ranina|evm.model.ctg124550_np12.5/R. ranina|evm.model.ctg075220_np12.80/R. ranina|evm.model.ctg122210_np12.103/R. ranina|evm.model.ctg153230_np12.94/R. ranina|evm.model.ctg067280_np12.196/R. ranina|evm.model.ctg161210_np12.21/R. ranina|evm.model.ctg023930_np12.2/R. ranina|evm.model.ctg081580_np12.14/R. ranina|evm.model.ctg010490_np12.38/R. ranina|evm.model.ctg011720_np12.28/R. ranina|evm.model…	16
GO:0044447	GO:0044447	GO:0044447	34/2895	57/10213	7.49730071237319e-07	4.37380989251064e-05	4.07282514002524e-05	R. ranina|evm.model.ctg151730_np12.3/R. ranina|evm.model.ctg039930_np12.82/R. ranina|evm.model.ctg039930_np12.62/R. ranina|evm.model.ctg013950_np12.4/R. ranina|evm.model.ctg035270_np12.16/R. ranina|evm.model.ctg157610_np12.8/R. ranina|evm.model.ctg073430_np12.23/R. ranina|evm.model.ctg086370_np12.10/R. ranina|evm.model.ctg085330_np12.3/R. ranina|evm.model.ctg013840_np12.7/R. ranina|evm.model.ctg1…	34
GO:0016053	GO:0016053	organic acid biosynthetic process	124/2895	301/10213	8.18973904116296e-07	4.70537734001362e-05	4.38157569594595e-05	R. ranina|evm.model.ctg137280_np12.6/R. ranina|evm.model.ctg048790_np12.18/R. ranina|evm.model.ctg119810_np12.7/R. ranina|evm.model.ctg020810_np12.38/R. ranina|evm.model.ctg136520_np12.1/R. ranina|evm.model.ctg092550_np12.3/R. ranina|evm.model.ctg154590_np12.5/R. ranina|evm.model.ctg038340_np12.35/R. ranina|evm.model.ctg123680_np12.58/R. ranina|evm.model.ctg105530_np12.183/R. ranina|evm.model.ctg…	124
GO:0046394	GO:0046394	carboxylic acid biosynthetic process	124/2895	301/10213	8.18973904116296e-07	4.70537734001362e-05	4.38157569594595e-05	R. ranina|evm.model.ctg137280_np12.6/R. ranina|evm.model.ctg048790_np12.18/R. ranina|evm.model.ctg119810_np12.7/R. ranina|evm.model.ctg020810_np12.38/R. ranina|evm.model.ctg136520_np12.1/R. ranina|evm.model.ctg092550_np12.3/R. ranina|evm.model.ctg154590_np12.5/R. ranina|evm.model.ctg038340_np12.35/R. ranina|evm.model.ctg123680_np12.58/R. ranina|evm.model.ctg105530_np12.183/R. ranina|evm.model.ctg…	124
GO:0003094	GO:0003094	glomerular filtration	17/2895	21/10213	8.26473626038228e-07	4.71276389464204e-05	4.38845394308704e-05	R. ranina|evm.model.ctg011940_np12.108/R. ranina|evm.model.ctg103010_np12.34/R. ranina|evm.model.ctg156770_np12.6/R. ranina|evm.model.ctg118130_np12.4/R. ranina|evm.model.ctg065830_np12.44/R. ranina|evm.model.ctg084930_np12.1/R. ranina|evm.model.ctg107990_np12.58/R. ranina|evm.model.ctg045790_np12.10/R. ranina|evm.model.ctg024500_np12.132/R. ranina|evm.model.ctg009160_np12.2/R. ranina|evm.model.c…	17
GO:0050839	GO:0050839	cell adhesion molecule binding	100/2895	232/10213	8.37327478219899e-07	4.73902357822367e-05	4.41290656039065e-05	R. ranina|evm.model.ctg071890_np12.1/R. ranina|evm.model.ctg079800_np12.1/R. ranina|evm.model.ctg108960_np12.43/R. ranina|evm.model.ctg054770_np12.15/R. ranina|evm.model.ctg024470_np12.13/R. ranina|evm.model.ctg019910_np12.40/R. ranina|evm.model.ctg167530_np12.10/R. ranina|evm.model.ctg095650_np12.1/R. ranina|evm.model.ctg019910_np12.6/R. ranina|evm.model.ctg130180_np12.1/R. ranina|evm.model.ctg0…	100
GO:0005606	GO:0005606	laminin-1 complex	11/2895	11/10213	9.36540072231961e-07	5.22258816750529e-05	4.86319453916736e-05	R. ranina|evm.model.ctg079800_np12.1/R. ranina|evm.model.ctg088120_np12.16/R. ranina|evm.model.ctg006740_np12.3/R. ranina|evm.model.ctg070440_np12.68/R. ranina|evm.model.ctg095200_np12.36/R. ranina|evm.model.ctg088010_np12.1/R. ranina|evm.model.ctg065060_np12.5/R. ranina|evm.model.ctg006740_np12.15/R. ranina|evm.model.ctg017750_np12.1/R. ranina|evm.model.ctg006740_np12.5/R. ranina|evm.model.ctg04…	11
GO:0043256	GO:0043256	laminin complex	11/2895	11/10213	9.36540072231961e-07	5.22258816750529e-05	4.86319453916736e-05	R. ranina|evm.model.ctg079800_np12.1/R. ranina|evm.model.ctg088120_np12.16/R. ranina|evm.model.ctg006740_np12.3/R. ranina|evm.model.ctg070440_np12.68/R. ranina|evm.model.ctg095200_np12.36/R. ranina|evm.model.ctg088010_np12.1/R. ranina|evm.model.ctg065060_np12.5/R. ranina|evm.model.ctg006740_np12.15/R. ranina|evm.model.ctg017750_np12.1/R. ranina|evm.model.ctg006740_np12.5/R. ranina|evm.model.ctg04…	11
GO:0005328	GO:0005328	neurotransmitter:sodium symporter activity	23/2895	33/10213	9.62722685389261e-07	5.3294079167826e-05	4.96266346237154e-05	R. ranina|evm.model.ctg020530_np12.17/R. ranina|evm.model.ctg163670_np12.27/R. ranina|evm.model.ctg099580_np12.13/R. ranina|evm.model.ctg164830_np12.3/R. ranina|evm.model.ctg071190_np12.1/R. ranina|evm.model.ctg032900_np12.161/R. ranina|evm.model.ctg104860_np12.5/R. ranina|evm.model.ctg046280_np12.5/R. ranina|evm.model.ctg011120_np12.14/R. ranina|evm.model.ctg043830_np12.26/R. ranina|evm.model.ct…	23
GO:0048137	GO:0048137	spermatocyte division	22/2895	31/10213	1.02328226369771e-06	5.62360339701696e-05	5.23661381170703e-05	R. ranina|evm.model.ctg124550_np12.5/R. ranina|evm.model.ctg052580_np12.60/R. ranina|evm.model.ctg063860_np12.1/R. ranina|evm.model.ctg075220_np12.80/R. ranina|evm.model.ctg122210_np12.103/R. ranina|evm.model.ctg153230_np12.94/R. ranina|evm.model.ctg067280_np12.196/R. ranina|evm.model.ctg161210_np12.21/R. ranina|evm.model.ctg023930_np12.2/R. ranina|evm.model.ctg081580_np12.14/R. ranina|evm.model.…	22
GO:0005548	GO:0005548	phospholipid transporter activity	32/2895	53/10213	1.08438060183855e-06	5.91650538441982e-05	5.50935968022326e-05	R. ranina|evm.model.ctg009150_np12.28/R. ranina|evm.model.ctg130250_np12.2/R. ranina|evm.model.ctg057820_np12.10/R. ranina|evm.model.ctg022530_np12.9/R. ranina|evm.model.ctg075220_np12.80/R. ranina|evm.model.ctg166950_np12.4/R. ranina|evm.model.ctg107260_np12.1/R. ranina|evm.model.ctg138590_np12.30/R. ranina|evm.model.ctg156490_np12.3/R. ranina|evm.model.ctg072350_np12.3/R. ranina|evm.model.ctg09…	32
GO:0016049	GO:0016049	cell growth	113/2895	271/10213	1.24083430003845e-06	6.72177666535116e-05	6.25921602929172e-05	R. ranina|evm.model.ctg023530_np12.17/R. ranina|evm.model.ctg071890_np12.1/R. ranina|evm.model.ctg079800_np12.1/R. ranina|evm.model.ctg024470_np12.13/R. ranina|evm.model.ctg019910_np12.40/R. ranina|evm.model.ctg167530_np12.10/R. ranina|evm.model.ctg101500_np12.92/R. ranina|evm.model.ctg095650_np12.1/R. ranina|evm.model.ctg019910_np12.6/R. ranina|evm.model.ctg130180_np12.1/R. ranina|evm.model.ctg0…	113
GO:0006814	GO:0006814	sodium ion transport	78/2895	172/10213	1.26952579463558e-06	6.82842810391224e-05	6.35852822412104e-05	R. ranina|evm.model.ctg166350_np12.13/R. ranina|evm.model.ctg082860_np12.6/R. ranina|evm.model.ctg061900_np12.5/R. ranina|evm.model.ctg020530_np12.17/R. ranina|evm.model.ctg163670_np12.27/R. ranina|evm.model.ctg099580_np12.13/R. ranina|evm.model.ctg164830_np12.3/R. ranina|evm.model.ctg071190_np12.1/R. ranina|evm.model.ctg032900_np12.161/R. ranina|evm.model.ctg104860_np12.5/R. ranina|evm.model.ctg…	78
GO:0016835	GO:0016835	carbon-oxygen lyase activity	54/2895	108/10213	1.45646747713504e-06	7.77876714548741e-05	7.24346946189693e-05	R. ranina|evm.model.ctg119810_np12.7/R. ranina|evm.model.ctg118710_np12.45/R. ranina|evm.model.ctg096350_np12.5/R. ranina|evm.model.ctg038340_np12.35/R. ranina|evm.model.ctg123680_np12.58/R. ranina|evm.model.ctg106280_np12.9/R. ranina|evm.model.ctg066000_np12.1/R. ranina|evm.model.ctg117080_np12.13/R. ranina|evm.model.ctg134710_np12.40/R. ranina|evm.model.ctg157100_np12.5/R. ranina|evm.model.ctg1…	54
GO:0044837	GO:0044837	actomyosin contractile ring organization	36/2895	63/10213	1.51638773685466e-06	8.04215706035369e-05	7.48873413806253e-05	R. ranina|evm.model.ctg098620_np12.9/R. ranina|evm.model.ctg060680_np12.17/R. ranina|evm.model.ctg106050_np12.5/R. ranina|evm.model.ctg105830_np12.6/R. ranina|evm.model.ctg099850_np12.2/R. ranina|evm.model.ctg019700_np12.11/R. ranina|evm.model.ctg077690_np12.62/R. ranina|evm.model.ctg051530_np12.23/R. ranina|evm.model.ctg068500_np12.1/R. ranina|evm.model.ctg046100_np12.1/R. ranina|evm.model.ctg05…	36
GO:0030048	GO:0030048	actin filament-based movement	64/2895	135/10213	1.76704931991168e-06	9.30645975153485e-05	8.66603354333879e-05	R. ranina|evm.model.ctg127760_np12.2/R. ranina|evm.model.ctg143790_np12.2/R. ranina|evm.model.ctg024470_np12.13/R. ranina|evm.model.ctg019910_np12.40/R. ranina|evm.model.ctg167530_np12.10/R. ranina|evm.model.ctg095650_np12.1/R. ranina|evm.model.ctg019910_np12.6/R. ranina|evm.model.ctg130180_np12.1/R. ranina|evm.model.ctg000610_np12.1/R. ranina|evm.model.ctg123790_np12.1/R. ranina|evm.model.ctg075…	64
GO:0001736	GO:0001736	establishment of planar polarity	80/2895	179/10213	1.9000044235302e-06	9.9099618813054e-05	9.22800553265572e-05	R. ranina|evm.model.ctg071890_np12.1/R. ranina|evm.model.ctg047730_np12.2/R. ranina|evm.model.ctg024470_np12.13/R. ranina|evm.model.ctg019910_np12.40/R. ranina|evm.model.ctg167530_np12.10/R. ranina|evm.model.ctg101500_np12.92/R. ranina|evm.model.ctg095650_np12.1/R. ranina|evm.model.ctg019910_np12.6/R. ranina|evm.model.ctg130180_np12.1/R. ranina|evm.model.ctg000610_np12.1/R. ranina|evm.model.ctg12…	80
GO:0034204	GO:0034204	lipid translocation	15/2895	18/10213	1.93966744117099e-06	9.9099618813054e-05	9.22800553265572e-05	R. ranina|evm.model.ctg130250_np12.2/R. ranina|evm.model.ctg057820_np12.10/R. ranina|evm.model.ctg022530_np12.9/R. ranina|evm.model.ctg166950_np12.4/R. ranina|evm.model.ctg107260_np12.1/R. ranina|evm.model.ctg138590_np12.30/R. ranina|evm.model.ctg156490_np12.3/R. ranina|evm.model.ctg072350_np12.3/R. ranina|evm.model.ctg098730_np12.7/R. ranina|evm.model.ctg098730_np12.8/R. ranina|evm.model.ctg0723…	15
GO:0045332	GO:0045332	phospholipid translocation	15/2895	18/10213	1.93966744117099e-06	9.9099618813054e-05	9.22800553265572e-05	R. ranina|evm.model.ctg130250_np12.2/R. ranina|evm.model.ctg057820_np12.10/R. ranina|evm.model.ctg022530_np12.9/R. ranina|evm.model.ctg166950_np12.4/R. ranina|evm.model.ctg107260_np12.1/R. ranina|evm.model.ctg138590_np12.30/R. ranina|evm.model.ctg156490_np12.3/R. ranina|evm.model.ctg072350_np12.3/R. ranina|evm.model.ctg098730_np12.7/R. ranina|evm.model.ctg098730_np12.8/R. ranina|evm.model.ctg0723…	15
GO:0015914	GO:0015914	phospholipid transport	32/2895	54/10213	1.94102317164873e-06	9.9099618813054e-05	9.22800553265572e-05	R. ranina|evm.model.ctg009150_np12.28/R. ranina|evm.model.ctg130250_np12.2/R. ranina|evm.model.ctg057820_np12.10/R. ranina|evm.model.ctg022530_np12.9/R. ranina|evm.model.ctg075220_np12.80/R. ranina|evm.model.ctg166950_np12.4/R. ranina|evm.model.ctg107260_np12.1/R. ranina|evm.model.ctg138590_np12.30/R. ranina|evm.model.ctg156490_np12.3/R. ranina|evm.model.ctg072350_np12.3/R. ranina|evm.model.ctg09…	32
GO:0000132	GO:0000132	establishment of mitotic spindle orientation	51/2895	101/10213	1.94697299619529e-06	9.9099618813054e-05	9.22800553265572e-05	R. ranina|evm.model.ctg127760_np12.2/R. ranina|evm.model.ctg143790_np12.2/R. ranina|evm.model.ctg071890_np12.1/R. ranina|evm.model.ctg024470_np12.13/R. ranina|evm.model.ctg019910_np12.40/R. ranina|evm.model.ctg167530_np12.10/R. ranina|evm.model.ctg095650_np12.1/R. ranina|evm.model.ctg019910_np12.6/R. ranina|evm.model.ctg130180_np12.1/R. ranina|evm.model.ctg000610_np12.1/R. ranina|evm.model.ctg123…	51
GO:0098742	GO:0098742	cell-cell adhesion via plasma-membrane adhesion molecules	94/2895	219/10213	2.21393116654297e-06	0.000111936359780412	0.000104233432956749	R. ranina|evm.model.ctg127760_np12.2/R. ranina|evm.model.ctg143790_np12.2/R. ranina|evm.model.ctg004150_np12.16/R. ranina|evm.model.ctg024470_np12.13/R. ranina|evm.model.ctg019910_np12.40/R. ranina|evm.model.ctg167530_np12.10/R. ranina|evm.model.ctg101500_np12.92/R. ranina|evm.model.ctg095650_np12.1/R. ranina|evm.model.ctg019910_np12.6/R. ranina|evm.model.ctg130180_np12.1/R. ranina|evm.model.ctg0…	94
GO:0005509	GO:0005509	calcium ion binding	175/2895	460/10213	2.68609620121026e-06	0.000134909626423699	0.000125625788873612	R. ranina|evm.model.ctg054290_np12.3/R. ranina|evm.model.ctg070760_np12.18/R. ranina|evm.model.ctg127760_np12.2/R. ranina|evm.model.ctg143790_np12.2/R. ranina|evm.model.ctg006170_np12.34/R. ranina|evm.model.ctg136410_np12.85/R. ranina|evm.model.ctg061900_np12.5/R. ranina|evm.model.ctg167670_np12.25/R. ranina|evm.model.ctg084930_np12.11/R. ranina|evm.model.ctg123650_np12.5/R. ranina|evm.model.ctg0…	175
GO:0045503	GO:0045503	dynein light chain binding	30/2895	50/10213	2.82805195150236e-06	0.000141104907896012	0.000131394740599926	R. ranina|evm.model.ctg151730_np12.3/R. ranina|evm.model.ctg039930_np12.82/R. ranina|evm.model.ctg039930_np12.62/R. ranina|evm.model.ctg013950_np12.4/R. ranina|evm.model.ctg035270_np12.16/R. ranina|evm.model.ctg157610_np12.8/R. ranina|evm.model.ctg073430_np12.23/R. ranina|evm.model.ctg086370_np12.10/R. ranina|evm.model.ctg086890_np12.5/R. ranina|evm.model.ctg085330_np12.3/R. ranina|evm.model.ctg0…	30
GO:0007164	GO:0007164	establishment of tissue polarity	80/2895	181/10213	3.22886932920791e-06	0.000160050620867404	0.000149036699894433	R. ranina|evm.model.ctg071890_np12.1/R. ranina|evm.model.ctg047730_np12.2/R. ranina|evm.model.ctg024470_np12.13/R. ranina|evm.model.ctg019910_np12.40/R. ranina|evm.model.ctg167530_np12.10/R. ranina|evm.model.ctg101500_np12.92/R. ranina|evm.model.ctg095650_np12.1/R. ranina|evm.model.ctg019910_np12.6/R. ranina|evm.model.ctg130180_np12.1/R. ranina|evm.model.ctg000610_np12.1/R. ranina|evm.model.ctg12…	80
GO:0005608	GO:0005608	laminin-3 complex	10/2895	10/10213	3.31213807867685e-06	0.000163112046679774	0.000151887452972269	R. ranina|evm.model.ctg079800_np12.1/R. ranina|evm.model.ctg088120_np12.16/R. ranina|evm.model.ctg006740_np12.3/R. ranina|evm.model.ctg095200_np12.36/R. ranina|evm.model.ctg088010_np12.1/R. ranina|evm.model.ctg065060_np12.5/R. ranina|evm.model.ctg006740_np12.15/R. ranina|evm.model.ctg017750_np12.1/R. ranina|evm.model.ctg006740_np12.5/R. ranina|evm.model.ctg045620_np12.6	10
GO:0005858	GO:0005858	axonemal dynein complex	29/2895	48/10213	3.39992020509238e-06	0.00016635480538981	0.000154907060481934	R. ranina|evm.model.ctg151730_np12.3/R. ranina|evm.model.ctg039930_np12.82/R. ranina|evm.model.ctg039930_np12.62/R. ranina|evm.model.ctg013950_np12.4/R. ranina|evm.model.ctg035270_np12.16/R. ranina|evm.model.ctg157610_np12.8/R. ranina|evm.model.ctg073430_np12.23/R. ranina|evm.model.ctg086370_np12.10/R. ranina|evm.model.ctg085330_np12.3/R. ranina|evm.model.ctg013840_np12.7/R. ranina|evm.model.ctg1…	29
GO:0098609	GO:0098609	cell-cell adhesion	131/2895	329/10213	3.50897874379539e-06	0.000170590351236822	0.000158851136249145	R. ranina|evm.model.ctg127760_np12.2/R. ranina|evm.model.ctg143790_np12.2/R. ranina|evm.model.ctg079800_np12.1/R. ranina|evm.model.ctg004150_np12.16/R. ranina|evm.model.ctg024470_np12.13/R. ranina|evm.model.ctg019910_np12.40/R. ranina|evm.model.ctg167530_np12.10/R. ranina|evm.model.ctg101500_np12.92/R. ranina|evm.model.ctg095650_np12.1/R. ranina|evm.model.ctg019910_np12.6/R. ranina|evm.model.ctg1…	131
GO:0015748	GO:0015748	organophosphate ester transport	40/2895	75/10213	4.35508366543636e-06	0.00021037550648834	0.000195898466720835	R. ranina|evm.model.ctg014200_np12.18/R. ranina|evm.model.ctg009150_np12.28/R. ranina|evm.model.ctg130250_np12.2/R. ranina|evm.model.ctg057820_np12.10/R. ranina|evm.model.ctg022530_np12.9/R. ranina|evm.model.ctg155050_np12.7/R. ranina|evm.model.ctg075220_np12.80/R. ranina|evm.model.ctg166950_np12.4/R. ranina|evm.model.ctg107260_np12.1/R. ranina|evm.model.ctg138590_np12.30/R. ranina|evm.model.ctg1…	40
GO:0051294	GO:0051294	establishment of spindle orientation	56/2895	117/10213	5.34110143181861e-06	0.000256372868727293	0.000238730509700673	R. ranina|evm.model.ctg127760_np12.2/R. ranina|evm.model.ctg143790_np12.2/R. ranina|evm.model.ctg071890_np12.1/R. ranina|evm.model.ctg024470_np12.13/R. ranina|evm.model.ctg019910_np12.40/R. ranina|evm.model.ctg167530_np12.10/R. ranina|evm.model.ctg095650_np12.1/R. ranina|evm.model.ctg019910_np12.6/R. ranina|evm.model.ctg130180_np12.1/R. ranina|evm.model.ctg000610_np12.1/R. ranina|evm.model.ctg123…	56
GO:0040001	GO:0040001	establishment of mitotic spindle localization	58/2895	123/10213	6.55628863908819e-06	0.000312722597728584	0.000291202518898661	R. ranina|evm.model.ctg127760_np12.2/R. ranina|evm.model.ctg143790_np12.2/R. ranina|evm.model.ctg071890_np12.1/R. ranina|evm.model.ctg024470_np12.13/R. ranina|evm.model.ctg019910_np12.40/R. ranina|evm.model.ctg167530_np12.10/R. ranina|evm.model.ctg095650_np12.1/R. ranina|evm.model.ctg019910_np12.6/R. ranina|evm.model.ctg130180_np12.1/R. ranina|evm.model.ctg000610_np12.1/R. ranina|evm.model.ctg123…	58
GO:0008525	GO:0008525	phosphatidylcholine transporter activity	15/2895	19/10213	6.78415781704542e-06	0.000321569080527953	0.000299440228911564	R. ranina|evm.model.ctg075220_np12.80/R. ranina|evm.model.ctg138340_np12.22/R. ranina|evm.model.ctg122210_np12.103/R. ranina|evm.model.ctg153230_np12.94/R. ranina|evm.model.ctg067280_np12.196/R. ranina|evm.model.ctg161210_np12.21/R. ranina|evm.model.ctg023930_np12.2/R. ranina|evm.model.ctg081580_np12.14/R. ranina|evm.model.ctg010490_np12.38/R. ranina|evm.model.ctg011720_np12.28/R. ranina|evm.mode…	15
GO:0070390	GO:0070390	transcription export complex 2	17/2895	23/10213	7.52532437732453e-06	0.000354484845202666	0.00033009088752841	R. ranina|evm.model.ctg168450_np12.5/R. ranina|evm.model.ctg054290_np12.3/R. ranina|evm.model.ctg098410_np12.25/R. ranina|evm.model.ctg001110_np12.15/R. ranina|evm.model.ctg090600_np12.6/R. ranina|evm.model.ctg128660_np12.59/R. ranina|evm.model.ctg083860_np12.1/R. ranina|evm.model.ctg150200_np12.6/R. ranina|evm.model.ctg146750_np12.3/R. ranina|evm.model.ctg093520_np12.84/R. ranina|evm.model.ctg00…	17
GO:0005929	GO:0005929	cilium	185/2895	499/10213	9.22201717478854e-06	0.000431727026256767	0.000402017629796337	R. ranina|evm.model.ctg054290_np12.3/R. ranina|evm.model.ctg151730_np12.3/R. ranina|evm.model.ctg039930_np12.82/R. ranina|evm.model.ctg117190_np12.3/R. ranina|evm.model.ctg039930_np12.62/R. ranina|evm.model.ctg122830_np12.4/R. ranina|evm.model.ctg101620_np12.2/R. ranina|evm.model.ctg111110_np12.391/R. ranina|evm.model.ctg049190_np12.25/R. ranina|evm.model.ctg131420_np12.8/R. ranina|evm.model.ctg0…	185
GO:0019897	GO:0019897	extrinsic component of plasma membrane	78/2895	180/10213	1.04202425705135e-05	0.000484828954937267	0.000451465336813531	R. ranina|evm.model.ctg070760_np12.18/R. ranina|evm.model.ctg127760_np12.2/R. ranina|evm.model.ctg143790_np12.2/R. ranina|evm.model.ctg117190_np12.3/R. ranina|evm.model.ctg024470_np12.13/R. ranina|evm.model.ctg019910_np12.40/R. ranina|evm.model.ctg167530_np12.10/R. ranina|evm.model.ctg095650_np12.1/R. ranina|evm.model.ctg019910_np12.6/R. ranina|evm.model.ctg130180_np12.1/R. ranina|evm.model.ctg00…	78
GO:0015077	GO:0015077	GO:0015077	115/2895	288/10213	1.17650144567107e-05	0.000544060180729842	0.000506620551926009	R. ranina|evm.model.ctg166350_np12.13/R. ranina|evm.model.ctg082860_np12.6/R. ranina|evm.model.ctg061900_np12.5/R. ranina|evm.model.ctg020530_np12.17/R. ranina|evm.model.ctg163670_np12.27/R. ranina|evm.model.ctg099580_np12.13/R. ranina|evm.model.ctg164830_np12.3/R. ranina|evm.model.ctg071190_np12.1/R. ranina|evm.model.ctg032900_np12.161/R. ranina|evm.model.ctg104860_np12.5/R. ranina|evm.model.ctg…	115
GO:0046530	GO:0046530	photoreceptor cell differentiation	125/2895	318/10213	1.22368313021996e-05	0.000562449264217467	0.000523744186325086	R. ranina|evm.model.ctg010560_np12.1/R. ranina|evm.model.ctg014670_np12.48/R. ranina|evm.model.ctg108960_np12.43/R. ranina|evm.model.ctg138560_np12.3/R. ranina|evm.model.ctg130380_np12.2/R. ranina|evm.model.ctg027160_np12.4/R. ranina|evm.model.ctg024470_np12.13/R. ranina|evm.model.ctg019910_np12.40/R. ranina|evm.model.ctg167530_np12.10/R. ranina|evm.model.ctg101500_np12.92/R. ranina|evm.model.ctg…	125
GO:0016653	GO:0016653	oxidoreductase activity, acting on NAD(P)H, heme protein as acceptor	12/2895	14/10213	1.31709379115746e-05	0.000601737307960131	0.000560328614132872	R. ranina|evm.model.ctg041710_np12.2/R. ranina|evm.model.ctg005080_np12.133/R. ranina|evm.model.ctg080860_np12.41/R. ranina|evm.model.ctg118690_np12.4/R. ranina|evm.model.ctg102980_np12.20/R. ranina|evm.model.ctg087400_np12.2/R. ranina|evm.model.ctg093940_np12.19/R. ranina|evm.model.ctg009420_np12.18/R. ranina|evm.model.ctg007590_np12.46/R. ranina|evm.model.ctg157960_np12.46/R. ranina|evm.model.c…	12
GO:1901605	GO:1901605	alpha-amino acid metabolic process	101/2895	248/10213	1.50876433450079e-05	0.000685177767236768	0.000638027098655268	R. ranina|evm.model.ctg157490_np12.5/R. ranina|evm.model.ctg084240_np12.34/R. ranina|evm.model.ctg119810_np12.7/R. ranina|evm.model.ctg020810_np12.38/R. ranina|evm.model.ctg099580_np12.13/R. ranina|evm.model.ctg099950_np12.15/R. ranina|evm.model.ctg038340_np12.35/R. ranina|evm.model.ctg123680_np12.58/R. ranina|evm.model.ctg030290_np12.47/R. ranina|evm.model.ctg106280_np12.9/R. ranina|evm.model.ct…	101
GO:0043124	GO:0043124	negative regulation of canonical NF-kappaB signal transduction	24/2895	39/10213	1.53319826536623e-05	0.00069212950265104	0.000644500448768297	R. ranina|evm.model.ctg066760_np12.12/R. ranina|evm.model.ctg021870_np12.2/R. ranina|evm.model.ctg053820_np12.24/R. ranina|evm.model.ctg117250_np12.12/R. ranina|evm.model.ctg084050_np12.3/R. ranina|evm.model.ctg112220_np12.31/R. ranina|evm.model.ctg001400_np12.17/R. ranina|evm.model.ctg030100_np12.110/R. ranina|evm.model.ctg127340_np12.40/R. ranina|evm.model.ctg131980_np12.54/R. ranina|evm.model.…	24
GO:0042675	GO:0042675	compound eye cone cell differentiation	19/2895	28/10213	1.59914092454275e-05	0.000717626317853979	0.000668242694659441	R. ranina|evm.model.ctg027160_np12.4/R. ranina|evm.model.ctg098150_np12.14/R. ranina|evm.model.ctg098150_np12.10/R. ranina|evm.model.ctg099160_np12.1/R. ranina|evm.model.ctg084600_np12.6/R. ranina|evm.model.ctg137150_np12.6/R. ranina|evm.model.ctg118230_np12.5/R. ranina|evm.model.ctg139590_np12.11/R. ranina|evm.model.ctg158110_np12.8/R. ranina|evm.model.ctg022190_np12.4/R. ranina|evm.model.ctg133…	19
GO:0005416	GO:0005416	amino acid:monoatomic cation symporter activity	13/2895	16/10213	1.68485416560043e-05	0.000747247601866294	0.000695825583072531	R. ranina|evm.model.ctg020530_np12.17/R. ranina|evm.model.ctg099580_np12.13/R. ranina|evm.model.ctg164830_np12.3/R. ranina|evm.model.ctg032900_np12.161/R. ranina|evm.model.ctg046280_np12.5/R. ranina|evm.model.ctg057880_np12.74/R. ranina|evm.model.ctg155470_np12.1/R. ranina|evm.model.ctg032900_np12.79/R. ranina|evm.model.ctg032900_np12.38/R. ranina|evm.model.ctg145930_np12.5/R. ranina|evm.model.ct…	13
GO:0046625	GO:0046625	sphingolipid binding	13/2895	16/10213	1.68485416560043e-05	0.000747247601866294	0.000695825583072531	R. ranina|evm.model.ctg079800_np12.1/R. ranina|evm.model.ctg088120_np12.16/R. ranina|evm.model.ctg006740_np12.3/R. ranina|evm.model.ctg070440_np12.68/R. ranina|evm.model.ctg095200_np12.36/R. ranina|evm.model.ctg088010_np12.1/R. ranina|evm.model.ctg065060_np12.5/R. ranina|evm.model.ctg006740_np12.15/R. ranina|evm.model.ctg017750_np12.1/R. ranina|evm.model.ctg006740_np12.5/R. ranina|evm.model.ctg04…	13
GO:0005326	GO:0005326	neurotransmitter transmembrane transporter activity	29/2895	51/10213	1.79084317014891e-05	0.000789636895488915	0.000735297847523197	R. ranina|evm.model.ctg020530_np12.17/R. ranina|evm.model.ctg163670_np12.27/R. ranina|evm.model.ctg099580_np12.13/R. ranina|evm.model.ctg164830_np12.3/R. ranina|evm.model.ctg071190_np12.1/R. ranina|evm.model.ctg032900_np12.161/R. ranina|evm.model.ctg104860_np12.5/R. ranina|evm.model.ctg046280_np12.5/R. ranina|evm.model.ctg011120_np12.14/R. ranina|evm.model.ctg043830_np12.26/R. ranina|evm.model.ct…	29
GO:0004843	GO:0004843	cysteine-type deubiquitinase activity	39/2895	76/10213	1.89565822220312e-05	0.000819468488613363	0.000763076572577594	R. ranina|evm.model.ctg066760_np12.12/R. ranina|evm.model.ctg164500_np12.30/R. ranina|evm.model.ctg132260_np12.7/R. ranina|evm.model.ctg116420_np12.1/R. ranina|evm.model.ctg050330_np12.4/R. ranina|evm.model.ctg117250_np12.12/R. ranina|evm.model.ctg084050_np12.3/R. ranina|evm.model.ctg112220_np12.31/R. ranina|evm.model.ctg001400_np12.17/R. ranina|evm.model.ctg030100_np12.110/R. ranina|evm.model.ct…	39
GO:0008526	GO:0008526	phosphatidylinositol transfer activity	14/2895	18/10213	1.90828744463914e-05	0.000819468488613363	0.000763076572577594	R. ranina|evm.model.ctg075220_np12.80/R. ranina|evm.model.ctg122210_np12.103/R. ranina|evm.model.ctg153230_np12.94/R. ranina|evm.model.ctg067280_np12.196/R. ranina|evm.model.ctg161210_np12.21/R. ranina|evm.model.ctg023930_np12.2/R. ranina|evm.model.ctg081580_np12.14/R. ranina|evm.model.ctg010490_np12.38/R. ranina|evm.model.ctg011720_np12.28/R. ranina|evm.model.ctg145230_np12.7/R. ranina|evm.model…	14
GO:0031466	GO:0031466	Cul5-RING ubiquitin ligase complex	14/2895	18/10213	1.90828744463914e-05	0.000819468488613363	0.000763076572577594	R. ranina|evm.model.ctg023530_np12.17/R. ranina|evm.model.ctg088690_np12.29/R. ranina|evm.model.ctg085410_np12.41/R. ranina|evm.model.ctg124550_np12.39/R. ranina|evm.model.ctg123790_np12.49/R. ranina|evm.model.ctg138030_np12.4/R. ranina|evm.model.ctg140200_np12.35/R. ranina|evm.model.ctg027090_np12.2/R. ranina|evm.model.ctg063930_np12.124/R. ranina|evm.model.ctg145760_np12.11/R. ranina|evm.model.…	14
GO:0070540	GO:0070540	stearic acid binding	14/2895	18/10213	1.90828744463914e-05	0.000819468488613363	0.000763076572577594	R. ranina|evm.model.ctg075220_np12.80/R. ranina|evm.model.ctg122210_np12.103/R. ranina|evm.model.ctg153230_np12.94/R. ranina|evm.model.ctg067280_np12.196/R. ranina|evm.model.ctg161210_np12.21/R. ranina|evm.model.ctg023930_np12.2/R. ranina|evm.model.ctg081580_np12.14/R. ranina|evm.model.ctg010490_np12.38/R. ranina|evm.model.ctg011720_np12.28/R. ranina|evm.model.ctg145230_np12.7/R. ranina|evm.model…	14
GO:0035850	GO:0035850	epithelial cell differentiation involved in kidney development	26/2895	44/10213	1.91252534921631e-05	0.000819468488613363	0.000763076572577594	R. ranina|evm.model.ctg079800_np12.1/R. ranina|evm.model.ctg092850_np12.61/R. ranina|evm.model.ctg088120_np12.16/R. ranina|evm.model.ctg011940_np12.108/R. ranina|evm.model.ctg103010_np12.34/R. ranina|evm.model.ctg156770_np12.6/R. ranina|evm.model.ctg118130_np12.4/R. ranina|evm.model.ctg065830_np12.44/R. ranina|evm.model.ctg084930_np12.1/R. ranina|evm.model.ctg107990_np12.58/R. ranina|evm.model.ct…	26
GO:0031210	GO:0031210	phosphatidylcholine binding	16/2895	22/10213	1.98534628282944e-05	0.000841165709998797	0.000783280694589986	R. ranina|evm.model.ctg130380_np12.2/R. ranina|evm.model.ctg075220_np12.80/R. ranina|evm.model.ctg122210_np12.103/R. ranina|evm.model.ctg153230_np12.94/R. ranina|evm.model.ctg067280_np12.196/R. ranina|evm.model.ctg161210_np12.21/R. ranina|evm.model.ctg023930_np12.2/R. ranina|evm.model.ctg081580_np12.14/R. ranina|evm.model.ctg010490_np12.38/R. ranina|evm.model.ctg011720_np12.28/R. ranina|evm.model…	16
GO:0050997	GO:0050997	quaternary ammonium group binding	16/2895	22/10213	1.98534628282944e-05	0.000841165709998797	0.000783280694589986	R. ranina|evm.model.ctg130380_np12.2/R. ranina|evm.model.ctg075220_np12.80/R. ranina|evm.model.ctg122210_np12.103/R. ranina|evm.model.ctg153230_np12.94/R. ranina|evm.model.ctg067280_np12.196/R. ranina|evm.model.ctg161210_np12.21/R. ranina|evm.model.ctg023930_np12.2/R. ranina|evm.model.ctg081580_np12.14/R. ranina|evm.model.ctg010490_np12.38/R. ranina|evm.model.ctg011720_np12.28/R. ranina|evm.model…	16
GO:0046058	GO:0046058	cAMP metabolic process	22/2895	35/10213	2.1557141070348e-05	0.00090827421043066	0.000845771107841897	R. ranina|evm.model.ctg091820_np12.2/R. ranina|evm.model.ctg103430_np12.2/R. ranina|evm.model.ctg108260_np12.1/R. ranina|evm.model.ctg109660_np12.11/R. ranina|evm.model.ctg027860_np12.28/R. ranina|evm.model.ctg134000_np12.5/R. ranina|evm.model.ctg007540_np12.1/R. ranina|evm.model.ctg091820_np12.3/R. ranina|evm.model.ctg027210_np12.1/R. ranina|evm.model.ctg094710_np12.140/R. ranina|evm.model.ctg04…	22
GO:0044441	GO:0044441	GO:0044441	140/2895	368/10213	2.67924762446584e-05	0.00112261955712425	0.00104536622928417	R. ranina|evm.model.ctg054290_np12.3/R. ranina|evm.model.ctg151730_np12.3/R. ranina|evm.model.ctg039930_np12.82/R. ranina|evm.model.ctg117190_np12.3/R. ranina|evm.model.ctg039930_np12.62/R. ranina|evm.model.ctg101620_np12.2/R. ranina|evm.model.ctg013950_np12.4/R. ranina|evm.model.ctg035270_np12.16/R. ranina|evm.model.ctg156710_np12.5/R. ranina|evm.model.ctg024500_np12.115/R. ranina|evm.model.ctg0…	140
GO:0005283	GO:0005283	amino acid:sodium symporter activity	10/2895	11/10213	2.70681181431256e-05	0.00112793740657948	0.00105031812968323	R. ranina|evm.model.ctg020530_np12.17/R. ranina|evm.model.ctg099580_np12.13/R. ranina|evm.model.ctg032900_np12.161/R. ranina|evm.model.ctg046280_np12.5/R. ranina|evm.model.ctg155470_np12.1/R. ranina|evm.model.ctg032900_np12.79/R. ranina|evm.model.ctg145930_np12.5/R. ranina|evm.model.ctg148960_np12.5/R. ranina|evm.model.ctg110980_np12.4/R. ranina|evm.model.ctg161370_np12.1	10
GO:0000109	GO:0000109	nucleotide-excision repair complex	20/2895	31/10213	2.95077840049722e-05	0.00122287996663229	0.00113872719522208	R. ranina|evm.model.ctg054290_np12.3/R. ranina|evm.model.ctg098410_np12.25/R. ranina|evm.model.ctg001110_np12.15/R. ranina|evm.model.ctg090600_np12.6/R. ranina|evm.model.ctg128660_np12.59/R. ranina|evm.model.ctg083860_np12.1/R. ranina|evm.model.ctg150200_np12.6/R. ranina|evm.model.ctg146750_np12.3/R. ranina|evm.model.ctg093520_np12.84/R. ranina|evm.model.ctg000270_np12.17/R. ranina|evm.model.ctg0…	20
GO:0006289	GO:0006289	nucleotide-excision repair	55/2895	120/10213	3.12093182244809e-05	0.00128636668160034	0.00119784505702541	R. ranina|evm.model.ctg054290_np12.3/R. ranina|evm.model.ctg049570_np12.1/R. ranina|evm.model.ctg129040_np12.8/R. ranina|evm.model.ctg148060_np12.4/R. ranina|evm.model.ctg034480_np12.1/R. ranina|evm.model.ctg076690_np12.1/R. ranina|evm.model.ctg147080_np12.2/R. ranina|evm.model.ctg151470_np12.11/R. ranina|evm.model.ctg142520_np12.2/R. ranina|evm.model.ctg166430_np12.53/R. ranina|evm.model.ctg1459…	55
GO:0000916	GO:0000916	actomyosin contractile ring contraction	19/2895	29/10213	3.40522729503242e-05	0.0013813012446155	0.00128624667584463	R. ranina|evm.model.ctg067900_np12.29/R. ranina|evm.model.ctg124550_np12.5/R. ranina|evm.model.ctg075220_np12.80/R. ranina|evm.model.ctg004760_np12.11/R. ranina|evm.model.ctg094650_np12.57/R. ranina|evm.model.ctg170500_np12.4/R. ranina|evm.model.ctg122210_np12.103/R. ranina|evm.model.ctg153230_np12.94/R. ranina|evm.model.ctg067280_np12.196/R. ranina|evm.model.ctg161210_np12.21/R. ranina|evm.model…	19
GO:0036213	GO:0036213	contractile ring contraction	19/2895	29/10213	3.40522729503242e-05	0.0013813012446155	0.00128624667584463	R. ranina|evm.model.ctg067900_np12.29/R. ranina|evm.model.ctg124550_np12.5/R. ranina|evm.model.ctg075220_np12.80/R. ranina|evm.model.ctg004760_np12.11/R. ranina|evm.model.ctg094650_np12.57/R. ranina|evm.model.ctg170500_np12.4/R. ranina|evm.model.ctg122210_np12.103/R. ranina|evm.model.ctg153230_np12.94/R. ranina|evm.model.ctg067280_np12.196/R. ranina|evm.model.ctg161210_np12.21/R. ranina|evm.model…	19
GO:0015672	GO:0015672	GO:0015672	126/2895	327/10213	3.40589837477715e-05	0.0013813012446155	0.00128624667584463	R. ranina|evm.model.ctg166350_np12.13/R. ranina|evm.model.ctg082860_np12.6/R. ranina|evm.model.ctg061900_np12.5/R. ranina|evm.model.ctg020530_np12.17/R. ranina|evm.model.ctg163670_np12.27/R. ranina|evm.model.ctg099580_np12.13/R. ranina|evm.model.ctg164830_np12.3/R. ranina|evm.model.ctg071190_np12.1/R. ranina|evm.model.ctg032900_np12.161/R. ranina|evm.model.ctg104860_np12.5/R. ranina|evm.model.ctg…	126
GO:0048675	GO:0048675	axon extension	57/2895	126/10213	3.6006549172152e-05	0.00145251951554043	0.00135256404477026	R. ranina|evm.model.ctg079800_np12.1/R. ranina|evm.model.ctg024470_np12.13/R. ranina|evm.model.ctg019910_np12.40/R. ranina|evm.model.ctg167530_np12.10/R. ranina|evm.model.ctg101500_np12.92/R. ranina|evm.model.ctg095650_np12.1/R. ranina|evm.model.ctg019910_np12.6/R. ranina|evm.model.ctg130180_np12.1/R. ranina|evm.model.ctg000610_np12.1/R. ranina|evm.model.ctg123790_np12.1/R. ranina|evm.model.ctg07…	57
GO:0005201	GO:0005201	extracellular matrix structural constituent	28/2895	50/10213	3.65689570270542e-05	0.0014596787899641	0.00135923065204713	R. ranina|evm.model.ctg079800_np12.1/R. ranina|evm.model.ctg088120_np12.16/R. ranina|evm.model.ctg006740_np12.3/R. ranina|evm.model.ctg162840_np12.1/R. ranina|evm.model.ctg060140_np12.3/R. ranina|evm.model.ctg168000_np12.2/R. ranina|evm.model.ctg083330_np12.8/R. ranina|evm.model.ctg033060_np12.1/R. ranina|evm.model.ctg070440_np12.68/R. ranina|evm.model.ctg095200_np12.36/R. ranina|evm.model.ctg088…	28
GO:1990391	GO:1990391	DNA repair complex	28/2895	50/10213	3.65689570270542e-05	0.0014596787899641	0.00135923065204713	R. ranina|evm.model.ctg054290_np12.3/R. ranina|evm.model.ctg098410_np12.25/R. ranina|evm.model.ctg001110_np12.15/R. ranina|evm.model.ctg090600_np12.6/R. ranina|evm.model.ctg128660_np12.59/R. ranina|evm.model.ctg083860_np12.1/R. ranina|evm.model.ctg150200_np12.6/R. ranina|evm.model.ctg146750_np12.3/R. ranina|evm.model.ctg093520_np12.84/R. ranina|evm.model.ctg000270_np12.17/R. ranina|evm.model.ctg0…	28
GO:0048814	GO:0048814	regulation of dendrite morphogenesis	68/2895	157/10213	3.8310883154343e-05	0.00152120281592951	0.00141652088775138	R. ranina|evm.model.ctg010560_np12.1/R. ranina|evm.model.ctg092260_np12.15/R. ranina|evm.model.ctg083980_np12.83/R. ranina|evm.model.ctg024470_np12.13/R. ranina|evm.model.ctg019910_np12.40/R. ranina|evm.model.ctg167530_np12.10/R. ranina|evm.model.ctg095650_np12.1/R. ranina|evm.model.ctg019910_np12.6/R. ranina|evm.model.ctg130180_np12.1/R. ranina|evm.model.ctg000610_np12.1/R. ranina|evm.model.ctg1…	68
GO:0043954	GO:0043954	cellular component maintenance	45/2895	94/10213	4.33709152950983e-05	0.00170465112368449	0.00158734515722841	R. ranina|evm.model.ctg071890_np12.1/R. ranina|evm.model.ctg098620_np12.9/R. ranina|evm.model.ctg060680_np12.17/R. ranina|evm.model.ctg106050_np12.5/R. ranina|evm.model.ctg105830_np12.6/R. ranina|evm.model.ctg099850_np12.2/R. ranina|evm.model.ctg019700_np12.11/R. ranina|evm.model.ctg077690_np12.62/R. ranina|evm.model.ctg051530_np12.23/R. ranina|evm.model.ctg068500_np12.1/R. ranina|evm.model.ctg04…	45
GO:0044272	GO:0044272	sulfur compound biosynthetic process	79/2895	189/10213	4.33990948639888e-05	0.00170465112368449	0.00158734515722841	R. ranina|evm.model.ctg137280_np12.6/R. ranina|evm.model.ctg048790_np12.18/R. ranina|evm.model.ctg119810_np12.7/R. ranina|evm.model.ctg092550_np12.3/R. ranina|evm.model.ctg038340_np12.35/R. ranina|evm.model.ctg123680_np12.58/R. ranina|evm.model.ctg068590_np12.11/R. ranina|evm.model.ctg106280_np12.9/R. ranina|evm.model.ctg066000_np12.1/R. ranina|evm.model.ctg117080_np12.13/R. ranina|evm.model.ctg1…	79
GO:0005605	GO:0005605	GO:0005605	17/2895	25/10213	4.36052634486803e-05	0.00170465112368449	0.00158734515722841	R. ranina|evm.model.ctg079800_np12.1/R. ranina|evm.model.ctg088120_np12.16/R. ranina|evm.model.ctg006740_np12.3/R. ranina|evm.model.ctg033060_np12.1/R. ranina|evm.model.ctg070440_np12.68/R. ranina|evm.model.ctg095200_np12.36/R. ranina|evm.model.ctg088010_np12.1/R. ranina|evm.model.ctg123480_np12.10/R. ranina|evm.model.ctg065060_np12.5/R. ranina|evm.model.ctg006740_np12.15/R. ranina|evm.model.ctg0…	17
GO:0010977	GO:0010977	negative regulation of neuron projection development	75/2895	178/10213	4.87897568723422e-05	0.00189754623651201	0.00176696614767365	R. ranina|evm.model.ctg010560_np12.1/R. ranina|evm.model.ctg011410_np12.12/R. ranina|evm.model.ctg054770_np12.15/R. ranina|evm.model.ctg024470_np12.13/R. ranina|evm.model.ctg019910_np12.40/R. ranina|evm.model.ctg167530_np12.10/R. ranina|evm.model.ctg095650_np12.1/R. ranina|evm.model.ctg019910_np12.6/R. ranina|evm.model.ctg130180_np12.1/R. ranina|evm.model.ctg000610_np12.1/R. ranina|evm.model.ctg1…	75
GO:0030001	GO:0030001	metal ion transport	180/2895	496/10213	5.02503995338597e-05	0.00194438280645302	0.00181057964808091	R. ranina|evm.model.ctg166350_np12.13/R. ranina|evm.model.ctg082860_np12.6/R. ranina|evm.model.ctg061900_np12.5/R. ranina|evm.model.ctg167670_np12.25/R. ranina|evm.model.ctg128150_np12.14/R. ranina|evm.model.ctg020530_np12.17/R. ranina|evm.model.ctg163670_np12.27/R. ranina|evm.model.ctg099580_np12.13/R. ranina|evm.model.ctg164830_np12.3/R. ranina|evm.model.ctg071190_np12.1/R. ranina|evm.model.ctg…	180
GO:0015370	GO:0015370	solute:sodium symporter activity	38/2895	76/10213	5.10244105885815e-05	0.00195590375376442	0.00182130777870385	R. ranina|evm.model.ctg166350_np12.13/R. ranina|evm.model.ctg082860_np12.6/R. ranina|evm.model.ctg020530_np12.17/R. ranina|evm.model.ctg163670_np12.27/R. ranina|evm.model.ctg099580_np12.13/R. ranina|evm.model.ctg164830_np12.3/R. ranina|evm.model.ctg071190_np12.1/R. ranina|evm.model.ctg032900_np12.161/R. ranina|evm.model.ctg104860_np12.5/R. ranina|evm.model.ctg046280_np12.5/R. ranina|evm.model.ctg…	38
GO:0005825	GO:0005825	half bridge of spindle pole body	15/2895	21/10213	5.15797403418887e-05	0.00195590375376442	0.00182130777870385	R. ranina|evm.model.ctg054290_np12.3/R. ranina|evm.model.ctg098410_np12.25/R. ranina|evm.model.ctg001110_np12.15/R. ranina|evm.model.ctg090600_np12.6/R. ranina|evm.model.ctg128660_np12.59/R. ranina|evm.model.ctg083860_np12.1/R. ranina|evm.model.ctg150200_np12.6/R. ranina|evm.model.ctg146750_np12.3/R. ranina|evm.model.ctg093520_np12.84/R. ranina|evm.model.ctg000270_np12.17/R. ranina|evm.model.ctg0…	15
GO:0006171	GO:0006171	cAMP biosynthetic process	15/2895	21/10213	5.15797403418887e-05	0.00195590375376442	0.00182130777870385	R. ranina|evm.model.ctg091820_np12.2/R. ranina|evm.model.ctg103430_np12.2/R. ranina|evm.model.ctg108260_np12.1/R. ranina|evm.model.ctg109660_np12.11/R. ranina|evm.model.ctg027860_np12.28/R. ranina|evm.model.ctg134000_np12.5/R. ranina|evm.model.ctg007540_np12.1/R. ranina|evm.model.ctg091820_np12.3/R. ranina|evm.model.ctg027210_np12.1/R. ranina|evm.model.ctg094710_np12.140/R. ranina|evm.model.ctg04…	15
GO:0061496	GO:0061496	half bridge of mitotic spindle pole body	15/2895	21/10213	5.15797403418887e-05	0.00195590375376442	0.00182130777870385	R. ranina|evm.model.ctg054290_np12.3/R. ranina|evm.model.ctg098410_np12.25/R. ranina|evm.model.ctg001110_np12.15/R. ranina|evm.model.ctg090600_np12.6/R. ranina|evm.model.ctg128660_np12.59/R. ranina|evm.model.ctg083860_np12.1/R. ranina|evm.model.ctg150200_np12.6/R. ranina|evm.model.ctg146750_np12.3/R. ranina|evm.model.ctg093520_np12.84/R. ranina|evm.model.ctg000270_np12.17/R. ranina|evm.model.ctg0…	15
GO:0070831	GO:0070831	basement membrane assembly	13/2895	17/10213	5.29211777948868e-05	0.00199678712635036	0.00185937775242679	R. ranina|evm.model.ctg079800_np12.1/R. ranina|evm.model.ctg088120_np12.16/R. ranina|evm.model.ctg070440_np12.68/R. ranina|evm.model.ctg088010_np12.1/R. ranina|evm.model.ctg018570_np12.32/R. ranina|evm.model.ctg170660_np12.34/R. ranina|evm.model.ctg024750_np12.1/R. ranina|evm.model.ctg018570_np12.30/R. ranina|evm.model.ctg045620_np12.6/R. ranina|evm.model.ctg080840_np12.6/R. ranina|evm.model.ctg1…	13
GO:0003014	GO:0003014	renal system process	51/2895	111/10213	5.51862513152225e-05	0.00207194321769628	0.00192936195973855	R. ranina|evm.model.ctg130830_np12.7/R. ranina|evm.model.ctg124550_np12.5/R. ranina|evm.model.ctg011940_np12.108/R. ranina|evm.model.ctg103010_np12.34/R. ranina|evm.model.ctg156770_np12.6/R. ranina|evm.model.ctg118130_np12.4/R. ranina|evm.model.ctg065830_np12.44/R. ranina|evm.model.ctg084930_np12.1/R. ranina|evm.model.ctg107990_np12.58/R. ranina|evm.model.ctg045790_np12.10/R. ranina|evm.model.ctg…	51
GO:0060271	GO:0060271	cilium assembly	116/2895	300/10213	5.79602751765704e-05	0.00216537303910892	0.00201636238610117	R. ranina|evm.model.ctg054290_np12.3/R. ranina|evm.model.ctg151730_np12.3/R. ranina|evm.model.ctg028650_np12.13/R. ranina|evm.model.ctg101620_np12.2/R. ranina|evm.model.ctg013950_np12.4/R. ranina|evm.model.ctg035270_np12.16/R. ranina|evm.model.ctg026570_np12.52/R. ranina|evm.model.ctg149800_np12.1/R. ranina|evm.model.ctg173140_np12.1/R. ranina|evm.model.ctg078380_np12.23/R. ranina|evm.model.ctg12…	116
GO:0097730	GO:0097730	non-motile cilium	74/2895	176/10213	5.94075126587214e-05	0.00220856164707717	0.00205657895989351	R. ranina|evm.model.ctg054290_np12.3/R. ranina|evm.model.ctg117190_np12.3/R. ranina|evm.model.ctg122830_np12.4/R. ranina|evm.model.ctg111110_np12.391/R. ranina|evm.model.ctg049190_np12.25/R. ranina|evm.model.ctg131420_np12.8/R. ranina|evm.model.ctg152260_np12.73/R. ranina|evm.model.ctg156710_np12.5/R. ranina|evm.model.ctg099950_np12.15/R. ranina|evm.model.ctg114550_np12.3/R. ranina|evm.model.ctg1…	74
GO:0007413	GO:0007413	axonal fasciculation	41/2895	85/10213	7.53904633700268e-05	0.00278907938633309	0.00259714823491404	R. ranina|evm.model.ctg024470_np12.13/R. ranina|evm.model.ctg019910_np12.40/R. ranina|evm.model.ctg167530_np12.10/R. ranina|evm.model.ctg095650_np12.1/R. ranina|evm.model.ctg019910_np12.6/R. ranina|evm.model.ctg130180_np12.1/R. ranina|evm.model.ctg000610_np12.1/R. ranina|evm.model.ctg123790_np12.1/R. ranina|evm.model.ctg075370_np12.8/R. ranina|evm.model.ctg112980_np12.6/R. ranina|evm.model.ctg002…	41
GO:0016829	GO:0016829	lyase activity	93/2895	233/10213	7.9916833396606e-05	0.0029421808955333	0.00273971402788876	R. ranina|evm.model.ctg157490_np12.5/R. ranina|evm.model.ctg137280_np12.6/R. ranina|evm.model.ctg119810_np12.7/R. ranina|evm.model.ctg118710_np12.45/R. ranina|evm.model.ctg096350_np12.5/R. ranina|evm.model.ctg038340_np12.35/R. ranina|evm.model.ctg123680_np12.58/R. ranina|evm.model.ctg075220_np12.47/R. ranina|evm.model.ctg091820_np12.2/R. ranina|evm.model.ctg106280_np12.9/R. ranina|evm.model.ctg06…	93
GO:0005502	GO:0005502	11-cis retinal binding	9/2895	10/10213	8.72976767472741e-05	0.0031677778968963	0.00294978651874823	R. ranina|evm.model.ctg121520_np12.5/R. ranina|evm.model.ctg121520_np12.4/R. ranina|evm.model.ctg149930_np12.17/R. ranina|evm.model.ctg149930_np12.16/R. ranina|evm.model.ctg115190_np12.26/R. ranina|evm.model.ctg110450_np12.14/R. ranina|evm.model.ctg090580_np12.54/R. ranina|evm.model.ctg090580_np12.58/R. ranina|evm.model.ctg032910_np12.11	9
GO:0016918	GO:0016918	retinal binding	9/2895	10/10213	8.72976767472741e-05	0.0031677778968963	0.00294978651874823	R. ranina|evm.model.ctg121520_np12.5/R. ranina|evm.model.ctg121520_np12.4/R. ranina|evm.model.ctg149930_np12.17/R. ranina|evm.model.ctg149930_np12.16/R. ranina|evm.model.ctg115190_np12.26/R. ranina|evm.model.ctg110450_np12.14/R. ranina|evm.model.ctg090580_np12.54/R. ranina|evm.model.ctg090580_np12.58/R. ranina|evm.model.ctg032910_np12.11	9
GO:0045721	GO:0045721	negative regulation of gluconeogenesis	9/2895	10/10213	8.72976767472741e-05	0.0031677778968963	0.00294978651874823	R. ranina|evm.model.ctg120330_np12.18/R. ranina|evm.model.ctg146320_np12.12/R. ranina|evm.model.ctg106160_np12.5/R. ranina|evm.model.ctg168850_np12.4/R. ranina|evm.model.ctg029730_np12.11/R. ranina|evm.model.ctg053460_np12.8/R. ranina|evm.model.ctg028510_np12.1/R. ranina|evm.model.ctg053460_np12.3/R. ranina|evm.model.ctg099740_np12.1	9
GO:0097090	GO:0097090	presynaptic membrane organization	17/2895	26/10213	9.2705908342033e-05	0.00334800766126656	0.00311761372965764	R. ranina|evm.model.ctg010560_np12.1/R. ranina|evm.model.ctg148490_np12.110/R. ranina|evm.model.ctg151940_np12.14/R. ranina|evm.model.ctg003170_np12.27/R. ranina|evm.model.ctg003160_np12.14/R. ranina|evm.model.ctg013210_np12.28/R. ranina|evm.model.ctg009320_np12.124/R. ranina|evm.model.ctg006050_np12.5/R. ranina|evm.model.ctg121200_np12.2/R. ranina|evm.model.ctg158870_np12.3/R. ranina|evm.model.c…	17
GO:0044782	GO:0044782	cilium organization	118/2895	309/10213	9.36628190730995e-05	0.00336653469123406	0.00313486581771726	R. ranina|evm.model.ctg054290_np12.3/R. ranina|evm.model.ctg151730_np12.3/R. ranina|evm.model.ctg028650_np12.13/R. ranina|evm.model.ctg101620_np12.2/R. ranina|evm.model.ctg013950_np12.4/R. ranina|evm.model.ctg035270_np12.16/R. ranina|evm.model.ctg026570_np12.52/R. ranina|evm.model.ctg149800_np12.1/R. ranina|evm.model.ctg173140_np12.1/R. ranina|evm.model.ctg078380_np12.23/R. ranina|evm.model.ctg12…	118
GO:0008094	GO:0008094	ATP-dependent activity, acting on DNA	44/2895	94/10213	0.000102444376420401	0.00366480259798263	0.00341260834858226	R. ranina|evm.model.ctg068270_np12.1/R. ranina|evm.model.ctg151470_np12.11/R. ranina|evm.model.ctg152060_np12.1/R. ranina|evm.model.ctg068010_np12.49/R. ranina|evm.model.ctg062450_np12.7/R. ranina|evm.model.ctg107210_np12.12/R. ranina|evm.model.ctg003260_np12.2/R. ranina|evm.model.ctg055220_np12.14/R. ranina|evm.model.ctg075270_np12.2/R. ranina|evm.model.ctg166430_np12.53/R. ranina|evm.model.ctg1…	44
GO:0006813	GO:0006813	potassium ion transport	57/2895	130/10213	0.000105153986986371	0.0037440743535429	0.00348642499971121	R. ranina|evm.model.ctg061900_np12.5/R. ranina|evm.model.ctg019260_np12.68/R. ranina|evm.model.ctg162300_np12.5/R. ranina|evm.model.ctg134760_np12.55/R. ranina|evm.model.ctg014990_np12.1/R. ranina|evm.model.ctg098770_np12.1/R. ranina|evm.model.ctg046500_np12.42/R. ranina|evm.model.ctg083270_np12.1/R. ranina|evm.model.ctg049310_np12.1/R. ranina|evm.model.ctg084460_np12.107/R. ranina|evm.model.ctg0…	57
GO:0004016	GO:0004016	adenylate cyclase activity	16/2895	24/10213	0.000106156653953179	0.00376211244663975	0.00350322179720549	R. ranina|evm.model.ctg091820_np12.2/R. ranina|evm.model.ctg103430_np12.2/R. ranina|evm.model.ctg044960_np12.4/R. ranina|evm.model.ctg108260_np12.1/R. ranina|evm.model.ctg109660_np12.11/R. ranina|evm.model.ctg027860_np12.28/R. ranina|evm.model.ctg134000_np12.5/R. ranina|evm.model.ctg007540_np12.1/R. ranina|evm.model.ctg091820_np12.3/R. ranina|evm.model.ctg027210_np12.1/R. ranina|evm.model.ctg0947…	16
GO:0003091	GO:0003091	renal water homeostasis	20/2895	33/10213	0.000107654466922868	0.0037974487308978	0.00353612640678344	R. ranina|evm.model.ctg124550_np12.5/R. ranina|evm.model.ctg091820_np12.2/R. ranina|evm.model.ctg103430_np12.2/R. ranina|evm.model.ctg108260_np12.1/R. ranina|evm.model.ctg109660_np12.11/R. ranina|evm.model.ctg027860_np12.28/R. ranina|evm.model.ctg134000_np12.5/R. ranina|evm.model.ctg007540_np12.1/R. ranina|evm.model.ctg091820_np12.3/R. ranina|evm.model.ctg027210_np12.1/R. ranina|evm.model.ctg0947…	20
GO:0031345	GO:0031345	negative regulation of cell projection organization	85/2895	211/10213	0.000109510513156207	0.00384503579526237	0.00358043875616467	R. ranina|evm.model.ctg010560_np12.1/R. ranina|evm.model.ctg011410_np12.12/R. ranina|evm.model.ctg054770_np12.15/R. ranina|evm.model.ctg024470_np12.13/R. ranina|evm.model.ctg019910_np12.40/R. ranina|evm.model.ctg167530_np12.10/R. ranina|evm.model.ctg095650_np12.1/R. ranina|evm.model.ctg019910_np12.6/R. ranina|evm.model.ctg130180_np12.1/R. ranina|evm.model.ctg000610_np12.1/R. ranina|evm.model.ctg1…	85
GO:0030474	GO:0030474	spindle pole body duplication	15/2895	22/10213	0.000119564620728163	0.00414053919453146	0.00385560701978008	R. ranina|evm.model.ctg054290_np12.3/R. ranina|evm.model.ctg098410_np12.25/R. ranina|evm.model.ctg001110_np12.15/R. ranina|evm.model.ctg090600_np12.6/R. ranina|evm.model.ctg128660_np12.59/R. ranina|evm.model.ctg083860_np12.1/R. ranina|evm.model.ctg150200_np12.6/R. ranina|evm.model.ctg146750_np12.3/R. ranina|evm.model.ctg093520_np12.84/R. ranina|evm.model.ctg000270_np12.17/R. ranina|evm.model.ctg0…	15
GO:0051300	GO:0051300	spindle pole body organization	15/2895	22/10213	0.000119564620728163	0.00414053919453146	0.00385560701978008	R. ranina|evm.model.ctg054290_np12.3/R. ranina|evm.model.ctg098410_np12.25/R. ranina|evm.model.ctg001110_np12.15/R. ranina|evm.model.ctg090600_np12.6/R. ranina|evm.model.ctg128660_np12.59/R. ranina|evm.model.ctg083860_np12.1/R. ranina|evm.model.ctg150200_np12.6/R. ranina|evm.model.ctg146750_np12.3/R. ranina|evm.model.ctg093520_np12.84/R. ranina|evm.model.ctg000270_np12.17/R. ranina|evm.model.ctg0…	15
GO:1903087	GO:1903087	mitotic spindle pole body duplication	15/2895	22/10213	0.000119564620728163	0.00414053919453146	0.00385560701978008	R. ranina|evm.model.ctg054290_np12.3/R. ranina|evm.model.ctg098410_np12.25/R. ranina|evm.model.ctg001110_np12.15/R. ranina|evm.model.ctg090600_np12.6/R. ranina|evm.model.ctg128660_np12.59/R. ranina|evm.model.ctg083860_np12.1/R. ranina|evm.model.ctg150200_np12.6/R. ranina|evm.model.ctg146750_np12.3/R. ranina|evm.model.ctg093520_np12.84/R. ranina|evm.model.ctg000270_np12.17/R. ranina|evm.model.ctg0…	15
GO:0030497	GO:0030497	fatty acid elongation	10/2895	12/10213	0.00012077756567534	0.00416353208218989	0.00387701764648734	R. ranina|evm.model.ctg131220_np12.23/R. ranina|evm.model.ctg030470_np12.7/R. ranina|evm.model.ctg054900_np12.109/R. ranina|evm.model.ctg054900_np12.120/R. ranina|evm.model.ctg158140_np12.21/R. ranina|evm.model.ctg154590_np12.1/R. ranina|evm.model.ctg117570_np12.4/R. ranina|evm.model.ctg058010_np12.58/R. ranina|evm.model.ctg101100_np12.1/R. ranina|evm.model.ctg169770_np12.11	10
GO:0070911	GO:0070911	global genome nucleotide-excision repair	22/2895	38/10213	0.000128000911951693	0.00439257428163638	0.00409029825331702	R. ranina|evm.model.ctg054290_np12.3/R. ranina|evm.model.ctg147080_np12.2/R. ranina|evm.model.ctg098410_np12.25/R. ranina|evm.model.ctg001110_np12.15/R. ranina|evm.model.ctg090600_np12.6/R. ranina|evm.model.ctg128660_np12.59/R. ranina|evm.model.ctg083860_np12.1/R. ranina|evm.model.ctg150200_np12.6/R. ranina|evm.model.ctg146750_np12.3/R. ranina|evm.model.ctg093520_np12.84/R. ranina|evm.model.ctg00…	22
GO:0071377	GO:0071377	cellular response to glucagon stimulus	19/2895	31/10213	0.000129515944968939	0.00442454471461456	0.00412006863345951	R. ranina|evm.model.ctg091820_np12.2/R. ranina|evm.model.ctg103430_np12.2/R. ranina|evm.model.ctg108260_np12.1/R. ranina|evm.model.ctg109660_np12.11/R. ranina|evm.model.ctg027860_np12.28/R. ranina|evm.model.ctg134000_np12.5/R. ranina|evm.model.ctg007540_np12.1/R. ranina|evm.model.ctg091820_np12.3/R. ranina|evm.model.ctg027210_np12.1/R. ranina|evm.model.ctg094710_np12.140/R. ranina|evm.model.ctg04…	19
GO:0046873	GO:0046873	metal ion transmembrane transporter activity	129/2895	345/10213	0.000134727751544892	0.00458195187316799	0.00426664378151844	R. ranina|evm.model.ctg166350_np12.13/R. ranina|evm.model.ctg082860_np12.6/R. ranina|evm.model.ctg061900_np12.5/R. ranina|evm.model.ctg128150_np12.14/R. ranina|evm.model.ctg020530_np12.17/R. ranina|evm.model.ctg163670_np12.27/R. ranina|evm.model.ctg099580_np12.13/R. ranina|evm.model.ctg164830_np12.3/R. ranina|evm.model.ctg071190_np12.1/R. ranina|evm.model.ctg032900_np12.161/R. ranina|evm.model.ct…	129
GO:0008294	GO:0008294	calcium- and calmodulin-responsive adenylate cyclase activity	13/2895	18/10213	0.000140900766500975	0.00472828058913008	0.0044029028526085	R. ranina|evm.model.ctg103430_np12.2/R. ranina|evm.model.ctg108260_np12.1/R. ranina|evm.model.ctg109660_np12.11/R. ranina|evm.model.ctg027860_np12.28/R. ranina|evm.model.ctg134000_np12.5/R. ranina|evm.model.ctg007540_np12.1/R. ranina|evm.model.ctg027210_np12.1/R. ranina|evm.model.ctg094710_np12.140/R. ranina|evm.model.ctg045220_np12.14/R. ranina|evm.model.ctg134850_np12.59/R. ranina|evm.model.ctg…	13
GO:1902405	GO:1902405	GO:1902405	13/2895	18/10213	0.000140900766500975	0.00472828058913008	0.0044029028526085	R. ranina|evm.model.ctg098620_np12.9/R. ranina|evm.model.ctg060680_np12.17/R. ranina|evm.model.ctg106050_np12.5/R. ranina|evm.model.ctg105830_np12.6/R. ranina|evm.model.ctg099850_np12.2/R. ranina|evm.model.ctg019700_np12.11/R. ranina|evm.model.ctg077690_np12.62/R. ranina|evm.model.ctg051530_np12.23/R. ranina|evm.model.ctg068500_np12.1/R. ranina|evm.model.ctg046100_np12.1/R. ranina|evm.model.ctg05…	13
GO:1903474	GO:1903474	GO:1903474	13/2895	18/10213	0.000140900766500975	0.00472828058913008	0.0044029028526085	R. ranina|evm.model.ctg098620_np12.9/R. ranina|evm.model.ctg060680_np12.17/R. ranina|evm.model.ctg106050_np12.5/R. ranina|evm.model.ctg105830_np12.6/R. ranina|evm.model.ctg099850_np12.2/R. ranina|evm.model.ctg019700_np12.11/R. ranina|evm.model.ctg077690_np12.62/R. ranina|evm.model.ctg051530_np12.23/R. ranina|evm.model.ctg068500_np12.1/R. ranina|evm.model.ctg046100_np12.1/R. ranina|evm.model.ctg05…	13
GO:0034982	GO:0034982	mitochondrial protein processing	12/2895	16/10213	0.000144435316095194	0.00480428904857282	0.0044736807721068	R. ranina|evm.model.ctg108320_np12.3/R. ranina|evm.model.ctg107600_np12.7/R. ranina|evm.model.ctg008200_np12.26/R. ranina|evm.model.ctg125970_np12.9/R. ranina|evm.model.ctg164120_np12.47/R. ranina|evm.model.ctg108320_np12.2/R. ranina|evm.model.ctg109370_np12.7/R. ranina|evm.model.ctg152280_np12.1/R. ranina|evm.model.ctg018760_np12.22/R. ranina|evm.model.ctg020680_np12.6/R. ranina|evm.model.ctg144…	12
GO:0106030	GO:0106030	neuron projection fasciculation	41/2895	87/10213	0.000144816077656572	0.00480428904857282	0.0044736807721068	R. ranina|evm.model.ctg024470_np12.13/R. ranina|evm.model.ctg019910_np12.40/R. ranina|evm.model.ctg167530_np12.10/R. ranina|evm.model.ctg095650_np12.1/R. ranina|evm.model.ctg019910_np12.6/R. ranina|evm.model.ctg130180_np12.1/R. ranina|evm.model.ctg000610_np12.1/R. ranina|evm.model.ctg123790_np12.1/R. ranina|evm.model.ctg075370_np12.8/R. ranina|evm.model.ctg112980_np12.6/R. ranina|evm.model.ctg002…	41
GO:0006997	GO:0006997	nucleus organization	76/2895	186/10213	0.000145645481170836	0.00480428904857282	0.0044736807721068	R. ranina|evm.model.ctg095720_np12.4/R. ranina|evm.model.ctg028650_np12.13/R. ranina|evm.model.ctg147080_np12.2/R. ranina|evm.model.ctg080580_np12.2/R. ranina|evm.model.ctg065110_np12.32/R. ranina|evm.model.ctg036930_np12.14/R. ranina|evm.model.ctg105600_np12.2/R. ranina|evm.model.ctg033820_np12.19/R. ranina|evm.model.ctg003800_np12.6/R. ranina|evm.model.ctg016170_np12.21/R. ranina|evm.model.ctg0…	76
GO:0007163	GO:0007163	establishment or maintenance of cell polarity	154/2895	423/10213	0.00014569969424733	0.00480428904857282	0.0044736807721068	R. ranina|evm.model.ctg127760_np12.2/R. ranina|evm.model.ctg143790_np12.2/R. ranina|evm.model.ctg071890_np12.1/R. ranina|evm.model.ctg108960_np12.43/R. ranina|evm.model.ctg138560_np12.3/R. ranina|evm.model.ctg147080_np12.2/R. ranina|evm.model.ctg024470_np12.13/R. ranina|evm.model.ctg019910_np12.40/R. ranina|evm.model.ctg167530_np12.10/R. ranina|evm.model.ctg101500_np12.92/R. ranina|evm.model.ctg0…	154
GO:0051293	GO:0051293	establishment of spindle localization	60/2895	140/10213	0.000152766983107347	0.00501551861422562	0.00467037452571059	R. ranina|evm.model.ctg127760_np12.2/R. ranina|evm.model.ctg143790_np12.2/R. ranina|evm.model.ctg071890_np12.1/R. ranina|evm.model.ctg024470_np12.13/R. ranina|evm.model.ctg019910_np12.40/R. ranina|evm.model.ctg167530_np12.10/R. ranina|evm.model.ctg095650_np12.1/R. ranina|evm.model.ctg019910_np12.6/R. ranina|evm.model.ctg130180_np12.1/R. ranina|evm.model.ctg000610_np12.1/R. ranina|evm.model.ctg123…	60
GO:0015277	GO:0015277	kainate selective glutamate receptor activity	21/2895	36/10213	0.000156957617682711	0.00508703663463965	0.004736971016794	R. ranina|evm.model.ctg162300_np12.5/R. ranina|evm.model.ctg134760_np12.55/R. ranina|evm.model.ctg014990_np12.1/R. ranina|evm.model.ctg098770_np12.1/R. ranina|evm.model.ctg046500_np12.42/R. ranina|evm.model.ctg083270_np12.1/R. ranina|evm.model.ctg049310_np12.1/R. ranina|evm.model.ctg084460_np12.107/R. ranina|evm.model.ctg084460_np12.43/R. ranina|evm.model.ctg087500_np12.53/R. ranina|evm.model.ctg…	21
GO:0044062	GO:0044062	regulation of excretion	21/2895	36/10213	0.000156957617682711	0.00508703663463965	0.004736971016794	R. ranina|evm.model.ctg011940_np12.108/R. ranina|evm.model.ctg103010_np12.34/R. ranina|evm.model.ctg156770_np12.6/R. ranina|evm.model.ctg118130_np12.4/R. ranina|evm.model.ctg065830_np12.44/R. ranina|evm.model.ctg084930_np12.1/R. ranina|evm.model.ctg107990_np12.58/R. ranina|evm.model.ctg045790_np12.10/R. ranina|evm.model.ctg024500_np12.132/R. ranina|evm.model.ctg009160_np12.2/R. ranina|evm.model.c…	21
GO:0045198	GO:0045198	establishment of epithelial cell apical/basal polarity	21/2895	36/10213	0.000156957617682711	0.00508703663463965	0.004736971016794	R. ranina|evm.model.ctg049820_np12.10/R. ranina|evm.model.ctg012270_np12.78/R. ranina|evm.model.ctg012270_np12.122/R. ranina|evm.model.ctg086820_np12.1/R. ranina|evm.model.ctg086890_np12.5/R. ranina|evm.model.ctg094990_np12.35/R. ranina|evm.model.ctg086890_np12.6/R. ranina|evm.model.ctg006740_np12.3/R. ranina|evm.model.ctg095200_np12.36/R. ranina|evm.model.ctg065060_np12.5/R. ranina|evm.model.ctg…	21
GO:0036459	GO:0036459	GO:0036459	42/2895	90/10213	0.000158797137248826	0.00510304020718261	0.00475187329974297	R. ranina|evm.model.ctg066760_np12.12/R. ranina|evm.model.ctg164500_np12.30/R. ranina|evm.model.ctg132260_np12.7/R. ranina|evm.model.ctg013070_np12.1/R. ranina|evm.model.ctg144330_np12.42/R. ranina|evm.model.ctg116420_np12.1/R. ranina|evm.model.ctg016860_np12.8/R. ranina|evm.model.ctg050330_np12.4/R. ranina|evm.model.ctg117250_np12.12/R. ranina|evm.model.ctg084050_np12.3/R. ranina|evm.model.ctg11…	42
GO:0101005	GO:0101005	deubiquitinase activity	42/2895	90/10213	0.000158797137248826	0.00510304020718261	0.00475187329974297	R. ranina|evm.model.ctg066760_np12.12/R. ranina|evm.model.ctg164500_np12.30/R. ranina|evm.model.ctg132260_np12.7/R. ranina|evm.model.ctg013070_np12.1/R. ranina|evm.model.ctg144330_np12.42/R. ranina|evm.model.ctg116420_np12.1/R. ranina|evm.model.ctg016860_np12.8/R. ranina|evm.model.ctg050330_np12.4/R. ranina|evm.model.ctg117250_np12.12/R. ranina|evm.model.ctg084050_np12.3/R. ranina|evm.model.ctg11…	42
GO:0043492	GO:0043492	GO:0043492	56/2895	129/10213	0.000166349200609134	0.00532317441949229	0.0049568589246577	R. ranina|evm.model.ctg014200_np12.18/R. ranina|evm.model.ctg054340_np12.11/R. ranina|evm.model.ctg130250_np12.2/R. ranina|evm.model.ctg105040_np12.30/R. ranina|evm.model.ctg136520_np12.1/R. ranina|evm.model.ctg057820_np12.10/R. ranina|evm.model.ctg022530_np12.9/R. ranina|evm.model.ctg108770_np12.251/R. ranina|evm.model.ctg074140_np12.3/R. ranina|evm.model.ctg058040_np12.5/R. ranina|evm.model.ctg…	56
GO:0035089	GO:0035089	establishment of apical/basal cell polarity	23/2895	41/10213	0.000174025020324112	0.00554540232831121	0.00516379416786585	R. ranina|evm.model.ctg138560_np12.3/R. ranina|evm.model.ctg049820_np12.10/R. ranina|evm.model.ctg012270_np12.78/R. ranina|evm.model.ctg012270_np12.122/R. ranina|evm.model.ctg086820_np12.1/R. ranina|evm.model.ctg086890_np12.5/R. ranina|evm.model.ctg094990_np12.35/R. ranina|evm.model.ctg086890_np12.6/R. ranina|evm.model.ctg006740_np12.3/R. ranina|evm.model.ctg095200_np12.36/R. ranina|evm.model.ctg…	23
GO:0005272	GO:0005272	sodium channel activity	29/2895	56/10213	0.000176845304145166	0.00561169366793699	0.00522552365342401	R. ranina|evm.model.ctg162300_np12.5/R. ranina|evm.model.ctg134760_np12.55/R. ranina|evm.model.ctg014990_np12.1/R. ranina|evm.model.ctg098770_np12.1/R. ranina|evm.model.ctg046500_np12.42/R. ranina|evm.model.ctg083270_np12.1/R. ranina|evm.model.ctg049310_np12.1/R. ranina|evm.model.ctg084460_np12.107/R. ranina|evm.model.ctg084460_np12.43/R. ranina|evm.model.ctg087500_np12.53/R. ranina|evm.model.ctg…	29
GO:0030507	GO:0030507	spectrin binding	25/2895	46/10213	0.000181782441584431	0.00572843762850243	0.00533423385099139	R. ranina|evm.model.ctg156710_np12.5/R. ranina|evm.model.ctg011940_np12.108/R. ranina|evm.model.ctg103010_np12.34/R. ranina|evm.model.ctg156770_np12.6/R. ranina|evm.model.ctg118130_np12.4/R. ranina|evm.model.ctg065830_np12.44/R. ranina|evm.model.ctg084930_np12.1/R. ranina|evm.model.ctg107990_np12.58/R. ranina|evm.model.ctg045790_np12.10/R. ranina|evm.model.ctg024500_np12.132/R. ranina|evm.model.c…	25
GO:0048037	GO:0048037	GO:0048037	177/2895	497/10213	0.000182334237629433	0.00572843762850243	0.00533423385099139	R. ranina|evm.model.ctg074660_np12.12/R. ranina|evm.model.ctg157490_np12.5/R. ranina|evm.model.ctg035810_np12.24/R. ranina|evm.model.ctg129480_np12.5/R. ranina|evm.model.ctg038410_np12.6/R. ranina|evm.model.ctg048790_np12.18/R. ranina|evm.model.ctg119810_np12.7/R. ranina|evm.model.ctg147080_np12.2/R. ranina|evm.model.ctg020810_np12.38/R. ranina|evm.model.ctg025910_np12.3/R. ranina|evm.model.ctg06…	177
GO:0003341	GO:0003341	cilium movement	37/2895	77/10213	0.000183478466598619	0.00572843762850243	0.00533423385099139	R. ranina|evm.model.ctg151730_np12.3/R. ranina|evm.model.ctg039930_np12.82/R. ranina|evm.model.ctg039930_np12.62/R. ranina|evm.model.ctg013950_np12.4/R. ranina|evm.model.ctg035270_np12.16/R. ranina|evm.model.ctg078380_np12.23/R. ranina|evm.model.ctg157610_np12.8/R. ranina|evm.model.ctg073430_np12.23/R. ranina|evm.model.ctg086370_np12.10/R. ranina|evm.model.ctg086890_np12.5/R. ranina|evm.model.ctg…	37
GO:0007110	GO:0007110	meiosis I cytokinesis	17/2895	27/10213	0.000184300999651186	0.00572843762850243	0.00533423385099139	R. ranina|evm.model.ctg075220_np12.80/R. ranina|evm.model.ctg122210_np12.103/R. ranina|evm.model.ctg153230_np12.94/R. ranina|evm.model.ctg067280_np12.196/R. ranina|evm.model.ctg161210_np12.21/R. ranina|evm.model.ctg023930_np12.2/R. ranina|evm.model.ctg081580_np12.14/R. ranina|evm.model.ctg010490_np12.38/R. ranina|evm.model.ctg011720_np12.28/R. ranina|evm.model.ctg145230_np12.7/R. ranina|evm.model…	17
GO:0097035	GO:0097035	regulation of membrane lipid distribution	17/2895	27/10213	0.000184300999651186	0.00572843762850243	0.00533423385099139	R. ranina|evm.model.ctg009150_np12.28/R. ranina|evm.model.ctg130250_np12.2/R. ranina|evm.model.ctg057820_np12.10/R. ranina|evm.model.ctg022530_np12.9/R. ranina|evm.model.ctg166950_np12.4/R. ranina|evm.model.ctg107260_np12.1/R. ranina|evm.model.ctg138590_np12.30/R. ranina|evm.model.ctg156490_np12.3/R. ranina|evm.model.ctg072350_np12.3/R. ranina|evm.model.ctg098730_np12.7/R. ranina|evm.model.ctg098…	17
GO:0030010	GO:0030010	establishment of cell polarity	84/2895	211/10213	0.000192210000649715	0.0059498801833773	0.00554043778457116	R. ranina|evm.model.ctg127760_np12.2/R. ranina|evm.model.ctg143790_np12.2/R. ranina|evm.model.ctg071890_np12.1/R. ranina|evm.model.ctg138560_np12.3/R. ranina|evm.model.ctg024470_np12.13/R. ranina|evm.model.ctg019910_np12.40/R. ranina|evm.model.ctg167530_np12.10/R. ranina|evm.model.ctg095650_np12.1/R. ranina|evm.model.ctg019910_np12.6/R. ranina|evm.model.ctg130180_np12.1/R. ranina|evm.model.ctg000…	84
GO:0051653	GO:0051653	spindle localization	62/2895	147/10213	0.000205701295808388	0.00634162043662933	0.00590522034051551	R. ranina|evm.model.ctg127760_np12.2/R. ranina|evm.model.ctg143790_np12.2/R. ranina|evm.model.ctg071890_np12.1/R. ranina|evm.model.ctg024470_np12.13/R. ranina|evm.model.ctg019910_np12.40/R. ranina|evm.model.ctg167530_np12.10/R. ranina|evm.model.ctg095650_np12.1/R. ranina|evm.model.ctg019910_np12.6/R. ranina|evm.model.ctg130180_np12.1/R. ranina|evm.model.ctg000610_np12.1/R. ranina|evm.model.ctg123…	62
GO:0006294	GO:0006294	nucleotide-excision repair, preincision complex assembly	22/2895	39/10213	0.000215459088321546	0.00661555354587289	0.00616030267866717	R. ranina|evm.model.ctg054290_np12.3/R. ranina|evm.model.ctg147080_np12.2/R. ranina|evm.model.ctg098410_np12.25/R. ranina|evm.model.ctg001110_np12.15/R. ranina|evm.model.ctg090600_np12.6/R. ranina|evm.model.ctg128660_np12.59/R. ranina|evm.model.ctg083860_np12.1/R. ranina|evm.model.ctg150200_np12.6/R. ranina|evm.model.ctg146750_np12.3/R. ranina|evm.model.ctg093520_np12.84/R. ranina|evm.model.ctg00…	22
GO:0010771	GO:0010771	negative regulation of cell morphogenesis	48/2895	108/10213	0.000243043421689326	0.00743242463746715	0.00692096059471006	R. ranina|evm.model.ctg010560_np12.1/R. ranina|evm.model.ctg054770_np12.15/R. ranina|evm.model.ctg024470_np12.13/R. ranina|evm.model.ctg019910_np12.40/R. ranina|evm.model.ctg167530_np12.10/R. ranina|evm.model.ctg095650_np12.1/R. ranina|evm.model.ctg019910_np12.6/R. ranina|evm.model.ctg130180_np12.1/R. ranina|evm.model.ctg000610_np12.1/R. ranina|evm.model.ctg123790_np12.1/R. ranina|evm.model.ctg07…	48
GO:0032506	GO:0032506	cytokinetic process	40/2895	86/10213	0.000246166931831407	0.00749771088758793	0.00698175415623298	R. ranina|evm.model.ctg098620_np12.9/R. ranina|evm.model.ctg060680_np12.17/R. ranina|evm.model.ctg106050_np12.5/R. ranina|evm.model.ctg105830_np12.6/R. ranina|evm.model.ctg099850_np12.2/R. ranina|evm.model.ctg019700_np12.11/R. ranina|evm.model.ctg077690_np12.62/R. ranina|evm.model.ctg051530_np12.23/R. ranina|evm.model.ctg068500_np12.1/R. ranina|evm.model.ctg046100_np12.1/R. ranina|evm.model.ctg05…	40
GO:0032795	GO:0032795	heterotrimeric G-protein binding	15/2895	23/10213	0.00025368816271483	0.007665223211272	0.00713773908011657	R. ranina|evm.model.ctg054290_np12.3/R. ranina|evm.model.ctg098410_np12.25/R. ranina|evm.model.ctg001110_np12.15/R. ranina|evm.model.ctg090600_np12.6/R. ranina|evm.model.ctg128660_np12.59/R. ranina|evm.model.ctg083860_np12.1/R. ranina|evm.model.ctg150200_np12.6/R. ranina|evm.model.ctg146750_np12.3/R. ranina|evm.model.ctg093520_np12.84/R. ranina|evm.model.ctg000270_np12.17/R. ranina|evm.model.ctg0…	15
GO:0071942	GO:0071942	XPC complex	15/2895	23/10213	0.00025368816271483	0.007665223211272	0.00713773908011657	R. ranina|evm.model.ctg054290_np12.3/R. ranina|evm.model.ctg098410_np12.25/R. ranina|evm.model.ctg001110_np12.15/R. ranina|evm.model.ctg090600_np12.6/R. ranina|evm.model.ctg128660_np12.59/R. ranina|evm.model.ctg083860_np12.1/R. ranina|evm.model.ctg150200_np12.6/R. ranina|evm.model.ctg146750_np12.3/R. ranina|evm.model.ctg093520_np12.84/R. ranina|evm.model.ctg000270_np12.17/R. ranina|evm.model.ctg0…	15
GO:0001941	GO:0001941	postsynaptic membrane organization	21/2895	37/10213	0.000266521203289416	0.00802101907042433	0.00746905076386254	R. ranina|evm.model.ctg148490_np12.110/R. ranina|evm.model.ctg151940_np12.14/R. ranina|evm.model.ctg003170_np12.27/R. ranina|evm.model.ctg003160_np12.14/R. ranina|evm.model.ctg013210_np12.28/R. ranina|evm.model.ctg009320_np12.124/R. ranina|evm.model.ctg006050_np12.5/R. ranina|evm.model.ctg121200_np12.2/R. ranina|evm.model.ctg158870_np12.3/R. ranina|evm.model.ctg104350_np12.3/R. ranina|evm.model.c…	21
GO:0071824	GO:0071824	protein-DNA complex organization	84/2895	213/10213	0.000277329418835204	0.00831330558279124	0.00774122351140163	R. ranina|evm.model.ctg054290_np12.3/R. ranina|evm.model.ctg152650_np12.121/R. ranina|evm.model.ctg147080_np12.2/R. ranina|evm.model.ctg151960_np12.14/R. ranina|evm.model.ctg152060_np12.1/R. ranina|evm.model.ctg068010_np12.49/R. ranina|evm.model.ctg115220_np12.45/R. ranina|evm.model.ctg107210_np12.12/R. ranina|evm.model.ctg036120_np12.14/R. ranina|evm.model.ctg109190_np12.10/R. ranina|evm.model.c…	84
GO:0007111	GO:0007111	meiosis II cytokinesis	14/2895	21/10213	0.000292087168629604	0.00865308237065201	0.00805761848000005	R. ranina|evm.model.ctg075220_np12.80/R. ranina|evm.model.ctg122210_np12.103/R. ranina|evm.model.ctg153230_np12.94/R. ranina|evm.model.ctg067280_np12.196/R. ranina|evm.model.ctg161210_np12.21/R. ranina|evm.model.ctg023930_np12.2/R. ranina|evm.model.ctg081580_np12.14/R. ranina|evm.model.ctg010490_np12.38/R. ranina|evm.model.ctg011720_np12.28/R. ranina|evm.model.ctg145230_np12.7/R. ranina|evm.model…	14
GO:0016006	GO:0016006	Nebenkern	14/2895	21/10213	0.000292087168629604	0.00865308237065201	0.00805761848000005	R. ranina|evm.model.ctg075220_np12.80/R. ranina|evm.model.ctg122210_np12.103/R. ranina|evm.model.ctg153230_np12.94/R. ranina|evm.model.ctg067280_np12.196/R. ranina|evm.model.ctg161210_np12.21/R. ranina|evm.model.ctg023930_np12.2/R. ranina|evm.model.ctg081580_np12.14/R. ranina|evm.model.ctg010490_np12.38/R. ranina|evm.model.ctg011720_np12.28/R. ranina|evm.model.ctg145230_np12.7/R. ranina|evm.model…	14
GO:0061321	GO:0061321	garland nephrocyte differentiation	14/2895	21/10213	0.000292087168629604	0.00865308237065201	0.00805761848000005	R. ranina|evm.model.ctg011940_np12.108/R. ranina|evm.model.ctg103010_np12.34/R. ranina|evm.model.ctg156770_np12.6/R. ranina|evm.model.ctg118130_np12.4/R. ranina|evm.model.ctg065830_np12.44/R. ranina|evm.model.ctg084930_np12.1/R. ranina|evm.model.ctg107990_np12.58/R. ranina|evm.model.ctg045790_np12.10/R. ranina|evm.model.ctg024500_np12.132/R. ranina|evm.model.ctg009160_np12.2/R. ranina|evm.model.c…	14
GO:0008013	GO:0008013	beta-catenin binding	48/2895	109/10213	0.000316395475218359	0.00933674429593789	0.00869423404972342	R. ranina|evm.model.ctg127760_np12.2/R. ranina|evm.model.ctg143790_np12.2/R. ranina|evm.model.ctg024470_np12.13/R. ranina|evm.model.ctg019910_np12.40/R. ranina|evm.model.ctg167530_np12.10/R. ranina|evm.model.ctg095650_np12.1/R. ranina|evm.model.ctg019910_np12.6/R. ranina|evm.model.ctg130180_np12.1/R. ranina|evm.model.ctg000610_np12.1/R. ranina|evm.model.ctg123790_np12.1/R. ranina|evm.model.ctg075…	48
GO:0032187	GO:0032187	GO:0032187	13/2895	19/10213	0.000330227318401206	0.0095955708151523	0.00893524936137808	R. ranina|evm.model.ctg098620_np12.9/R. ranina|evm.model.ctg060680_np12.17/R. ranina|evm.model.ctg106050_np12.5/R. ranina|evm.model.ctg105830_np12.6/R. ranina|evm.model.ctg099850_np12.2/R. ranina|evm.model.ctg019700_np12.11/R. ranina|evm.model.ctg077690_np12.62/R. ranina|evm.model.ctg051530_np12.23/R. ranina|evm.model.ctg068500_np12.1/R. ranina|evm.model.ctg046100_np12.1/R. ranina|evm.model.ctg05…	13
GO:0032189	GO:0032189	GO:0032189	13/2895	19/10213	0.000330227318401206	0.0095955708151523	0.00893524936137808	R. ranina|evm.model.ctg098620_np12.9/R. ranina|evm.model.ctg060680_np12.17/R. ranina|evm.model.ctg106050_np12.5/R. ranina|evm.model.ctg105830_np12.6/R. ranina|evm.model.ctg099850_np12.2/R. ranina|evm.model.ctg019700_np12.11/R. ranina|evm.model.ctg077690_np12.62/R. ranina|evm.model.ctg051530_np12.23/R. ranina|evm.model.ctg068500_np12.1/R. ranina|evm.model.ctg046100_np12.1/R. ranina|evm.model.ctg05…	13
GO:0036214	GO:0036214	contractile ring localization	13/2895	19/10213	0.000330227318401206	0.0095955708151523	0.00893524936137808	R. ranina|evm.model.ctg098620_np12.9/R. ranina|evm.model.ctg060680_np12.17/R. ranina|evm.model.ctg106050_np12.5/R. ranina|evm.model.ctg105830_np12.6/R. ranina|evm.model.ctg099850_np12.2/R. ranina|evm.model.ctg019700_np12.11/R. ranina|evm.model.ctg077690_np12.62/R. ranina|evm.model.ctg051530_np12.23/R. ranina|evm.model.ctg068500_np12.1/R. ranina|evm.model.ctg046100_np12.1/R. ranina|evm.model.ctg05…	13
GO:1900075	GO:1900075	positive regulation of neuromuscular synaptic transmission	13/2895	19/10213	0.000330227318401206	0.0095955708151523	0.00893524936137808	R. ranina|evm.model.ctg162300_np12.5/R. ranina|evm.model.ctg014990_np12.1/R. ranina|evm.model.ctg098770_np12.1/R. ranina|evm.model.ctg046500_np12.42/R. ranina|evm.model.ctg083270_np12.1/R. ranina|evm.model.ctg049310_np12.1/R. ranina|evm.model.ctg157850_np12.23/R. ranina|evm.model.ctg098760_np12.170/R. ranina|evm.model.ctg038830_np12.4/R. ranina|evm.model.ctg099440_np12.1/R. ranina|evm.model.ctg08…	13
GO:0061318	GO:0061318	renal filtration cell differentiation	26/2895	50/10213	0.000347342713335347	0.00995117261818964	0.00926638034302608	R. ranina|evm.model.ctg079800_np12.1/R. ranina|evm.model.ctg092850_np12.61/R. ranina|evm.model.ctg088120_np12.16/R. ranina|evm.model.ctg011940_np12.108/R. ranina|evm.model.ctg103010_np12.34/R. ranina|evm.model.ctg156770_np12.6/R. ranina|evm.model.ctg118130_np12.4/R. ranina|evm.model.ctg065830_np12.44/R. ranina|evm.model.ctg084930_np12.1/R. ranina|evm.model.ctg107990_np12.58/R. ranina|evm.model.ct…	26
GO:0015079	GO:0015079	potassium ion transmembrane transporter activity	50/2895	115/10213	0.000347713705672502	0.00995117261818964	0.00926638034302608	R. ranina|evm.model.ctg061900_np12.5/R. ranina|evm.model.ctg019260_np12.68/R. ranina|evm.model.ctg162300_np12.5/R. ranina|evm.model.ctg134760_np12.55/R. ranina|evm.model.ctg014990_np12.1/R. ranina|evm.model.ctg098770_np12.1/R. ranina|evm.model.ctg046500_np12.42/R. ranina|evm.model.ctg083270_np12.1/R. ranina|evm.model.ctg049310_np12.1/R. ranina|evm.model.ctg084460_np12.107/R. ranina|evm.model.ctg0…	50
GO:0071804	GO:0071804	GO:0071804	50/2895	115/10213	0.000347713705672502	0.00995117261818964	0.00926638034302608	R. ranina|evm.model.ctg061900_np12.5/R. ranina|evm.model.ctg019260_np12.68/R. ranina|evm.model.ctg162300_np12.5/R. ranina|evm.model.ctg134760_np12.55/R. ranina|evm.model.ctg014990_np12.1/R. ranina|evm.model.ctg098770_np12.1/R. ranina|evm.model.ctg046500_np12.42/R. ranina|evm.model.ctg083270_np12.1/R. ranina|evm.model.ctg049310_np12.1/R. ranina|evm.model.ctg084460_np12.107/R. ranina|evm.model.ctg0…	50
GO:0071805	GO:0071805	potassium ion transmembrane transport	50/2895	115/10213	0.000347713705672502	0.00995117261818964	0.00926638034302608	R. ranina|evm.model.ctg061900_np12.5/R. ranina|evm.model.ctg019260_np12.68/R. ranina|evm.model.ctg162300_np12.5/R. ranina|evm.model.ctg134760_np12.55/R. ranina|evm.model.ctg014990_np12.1/R. ranina|evm.model.ctg098770_np12.1/R. ranina|evm.model.ctg046500_np12.42/R. ranina|evm.model.ctg083270_np12.1/R. ranina|evm.model.ctg049310_np12.1/R. ranina|evm.model.ctg084460_np12.107/R. ranina|evm.model.ctg0…	50
GO:0005267	GO:0005267	potassium channel activity	41/2895	90/10213	0.000358182098702237	0.00999110278122685	0.00930356270253871	R. ranina|evm.model.ctg019260_np12.68/R. ranina|evm.model.ctg162300_np12.5/R. ranina|evm.model.ctg134760_np12.55/R. ranina|evm.model.ctg014990_np12.1/R. ranina|evm.model.ctg098770_np12.1/R. ranina|evm.model.ctg046500_np12.42/R. ranina|evm.model.ctg083270_np12.1/R. ranina|evm.model.ctg049310_np12.1/R. ranina|evm.model.ctg084460_np12.107/R. ranina|evm.model.ctg084460_np12.43/R. ranina|evm.model.ctg…	41
GO:0002084	GO:0002084	protein depalmitoylation	9/2895	11/10213	0.000358330690465942	0.00999110278122685	0.00930356270253871	R. ranina|evm.model.ctg002110_np12.27/R. ranina|evm.model.ctg120320_np12.21/R. ranina|evm.model.ctg095060_np12.6/R. ranina|evm.model.ctg123550_np12.15/R. ranina|evm.model.ctg136220_np12.1/R. ranina|evm.model.ctg149200_np12.17/R. ranina|evm.model.ctg013250_np12.4/R. ranina|evm.model.ctg104690_np12.3/R. ranina|evm.model.ctg075720_np12.1	9
GO:0008377	GO:0008377	light-induced release of internally sequestered calcium ion	9/2895	11/10213	0.000358330690465942	0.00999110278122685	0.00930356270253871	R. ranina|evm.model.ctg121520_np12.5/R. ranina|evm.model.ctg121520_np12.4/R. ranina|evm.model.ctg149930_np12.17/R. ranina|evm.model.ctg149930_np12.16/R. ranina|evm.model.ctg115190_np12.26/R. ranina|evm.model.ctg110450_np12.14/R. ranina|evm.model.ctg090580_np12.54/R. ranina|evm.model.ctg090580_np12.58/R. ranina|evm.model.ctg032910_np12.11	9
[truncated: 119 more rows]

## Sheet: yiwei-ref_jijuxie-go.result
	ID	Description	GeneRatio	BgRatio	pvalue	p.adjust	qvalue	geneID	Count
[truncated: 1,175 more rows]

## Sheet: mianxie-ref_mianxie-go.result
	ID	Description	GeneRatio	BgRatio	pvalue	p.adjust	qvalue	geneID	Count
[truncated: 1,220 more rows]

## Sheet: xie-ref_aijiexie-go.result
	ID	Description	GeneRatio	BgRatio	pvalue	p.adjust	qvalue	geneID	Count
[truncated: 476 more rows]

[truncated: 3 more sheets: zhenxie-ref_aijiexie-go.result, shizumu-ref_ZhongGuoDuiXia-go.r, xixie-ref_xixie-go.result]
