# Supplementary material for: Phylogenomics of crabs provides insights into their origin and evolution
Source: Research Square preprint supplement (doi:10.21203/rs.3.rs-5612812/v1), 2025-01-10
Supplement: Supplementary file 2 [file 62d8f0256a5876d26e7156ab.xlsx]

## Sheet: TE_family_annotation_detail
Supplementary Table S63: TE family annotation detail
species	class	family	length	genome_size	pct1	pct2
P. monodon	DNA	ACADEM-1	208020	2394347767	0.0004	0.0001
P. monodon	DNA	CMC-CHAPAEV	0	2394347767	0	0
P. monodon	DNA	CMC-CHAPAEV-3	924364	2394347767	0.0018	0.0004
P. monodon	DNA	CMC-ENSPM	4156493	2394347767	0.0079	0.0017
P. monodon	DNA	CMC-MIRAGE	0	2394347767	0	0
P. monodon	DNA	CMC-TRANSIB	0	2394347767	0	0
P. monodon	DNA	CRYPTON	0	2394347767	0	0
P. monodon	DNA	CRYPTON-H	0	2394347767	0	0
P. monodon	DNA	CRYPTON-S	0	2394347767	0	0
P. monodon	DNA	CRYPTON-V	0	2394347767	0	0
P. monodon	DNA	CRYPTON-X	0	2394347767	0	0
P. monodon	DNA	DADA	0	2394347767	0	0
P. monodon	DNA	GINGER-1	136864	2394347767	0.0003	0.0001
P. monodon	DNA	GINGER-2	1904352	2394347767	0.0036	0.0008
P. monodon	DNA	HAT	153305	2394347767	0.0003	0.0001
P. monodon	DNA	HAT-AC	591918	2394347767	0.0011	0.0002
P. monodon	DNA	HAT-BLACKJACK	101907	2394347767	0.0002	0
P. monodon	DNA	HAT-CHARLIE	4567441	2394347767	0.0087	0.0019
P. monodon	DNA	HAT-HAT19	0	2394347767	0	0
P. monodon	DNA	HAT-HAT5	47397	2394347767	0.0001	0
P. monodon	DNA	HAT-HAT6	0	2394347767	0	0
P. monodon	DNA	HAT-HATM	0	2394347767	0	0
P. monodon	DNA	HAT-HATW	0	2394347767	0	0
P. monodon	DNA	HAT-HATX	0	2394347767	0	0
P. monodon	DNA	HAT-PEGASUS	0	2394347767	0	0
P. monodon	DNA	HAT-TAG1	527098	2394347767	0.001	0.0002
P. monodon	DNA	HAT-TIP100	80114	2394347767	0.0002	0
P. monodon	DNA	HELITRON	7028959	2394347767	0.0133	0.0029
P. monodon	DNA	HELITRON-2	0	2394347767	0	0
P. monodon	DNA	IS3EU	145998	2394347767	0.0003	0.0001
P. monodon	DNA	KOLOBOK-E	0	2394347767	0	0
P. monodon	DNA	KOLOBOK-HYDRA	0	2394347767	0	0
P. monodon	DNA	KOLOBOK-T2	0	2394347767	0	0
P. monodon	DNA	MAVERICK	6574477	2394347767	0.0125	0.0027
P. monodon	DNA	MAVERICK-MAVIRUS	0	2394347767	0	0
P. monodon	DNA	MERLIN	1797553	2394347767	0.0034	0.0008
P. monodon	DNA	MULE	0	2394347767	0	0
P. monodon	DNA	MULE-MUDR	3624101	2394347767	0.0069	0.0015
P. monodon	DNA	MULE-NOF	0	2394347767	0	0
P. monodon	DNA	NOVOSIB	0	2394347767	0	0
P. monodon	DNA	P	94106	2394347767	0.0002	0
P. monodon	DNA	PIF-HARBINGER	214380	2394347767	0.0004	0.0001
P. monodon	DNA	PIF-HARBS	0	2394347767	0	0
P. monodon	DNA	PIF-ISL2EU	0	2394347767	0	0
P. monodon	DNA	PIF-SPY	0	2394347767	0	0
P. monodon	DNA	PIGGYBAC	1917579	2394347767	0.0036	0.0008
P. monodon	DNA	PIGGYBAC-X	0	2394347767	0	0
P. monodon	DNA	SOLA-1	97648	2394347767	0.0002	0
P. monodon	DNA	SOLA-2	0	2394347767	0	0
P. monodon	DNA	SOLA-3	0	2394347767	0	0
P. monodon	DNA	TCMAR	0	2394347767	0	0
P. monodon	DNA	TCMAR-FOT1	888813	2394347767	0.0017	0.0004
P. monodon	DNA	TCMAR-ISRM11	53721	2394347767	0.0001	0
P. monodon	DNA	TCMAR-M44	0	2394347767	0	0
P. monodon	DNA	TCMAR-MARINER	5803709	2394347767	0.011	0.0024
P. monodon	DNA	TCMAR-POGO	0	2394347767	0	0
P. monodon	DNA	TCMAR-STOWAWAY	0	2394347767	0	0
P. monodon	DNA	TCMAR-TC1	3127445	2394347767	0.0059	0.0013
P. monodon	DNA	TCMAR-TC2	212035	2394347767	0.0004	0.0001
P. monodon	DNA	TCMAR-TC4	0	2394347767	0	0
P. monodon	DNA	TCMAR-TIGGER	29478	2394347767	0.0001	0
P. monodon	DNA	ZATOR	0	2394347767	0	0
P. monodon	DNA	ZISUPTON	0	2394347767	0	0
P. monodon	LINE	CR1	3127508	2394347767	0.0059	0.0013
P. monodon	LINE	CR1-ZENON	1455839	2394347767	0.0028	0.0006
P. monodon	LINE	CRE	649649	2394347767	0.0012	0.0003
P. monodon	LINE	DONG-R4	45072230	2394347767	0.0855	0.0188
P. monodon	LINE	I	109371979	2394347767	0.2075	0.0457
P. monodon	LINE	I-JOCKEY	7651071	2394347767	0.0145	0.0032
P. monodon	LINE	L1	0	2394347767	0	0
P. monodon	LINE	L1-TX1	129260	2394347767	0.0002	0.0001
P. monodon	LINE	L2	5546388	2394347767	0.0105	0.0023
P. monodon	LINE	PENELOPE	48663078	2394347767	0.0923	0.0203
P. monodon	LINE	PROTO2	0	2394347767	0	0
P. monodon	LINE	R1	0	2394347767	0	0
P. monodon	LINE	R1-LOA	0	2394347767	0	0
P. monodon	LINE	R2	425190	2394347767	0.0008	0.0002
P. monodon	LINE	R2-NESL	0	2394347767	0	0
P. monodon	LINE	REX-BABAR	584977	2394347767	0.0011	0.0002
P. monodon	LINE	RTE	0	2394347767	0	0
P. monodon	LINE	RTE-BOVB	70875224	2394347767	0.1344	0.0296
P. monodon	LINE	RTE-ORTE	0	2394347767	0	0
P. monodon	LINE	RTE-RTE	71092950	2394347767	0.1349	0.0297
P. monodon	LINE	RTE-X	119386	2394347767	0.0002	0
P. monodon	LINE	TAD1	0	2394347767	0	0
P. monodon	LTR	CAULIMOVIRUS	0	2394347767	0	0
P. monodon	LTR	COPIA	925583	2394347767	0.0018	0.0004
P. monodon	LTR	DIRS	0	2394347767	0	0
P. monodon	LTR	ERV1	369972	2394347767	0.0007	0.0002
P. monodon	LTR	ERV4	0	2394347767	0	0
P. monodon	LTR	ERVK	0	2394347767	0	0
P. monodon	LTR	ERVL	0	2394347767	0	0
P. monodon	LTR	ERVL-MALR	0	2394347767	0	0
P. monodon	LTR	GYPSY	78112544	2394347767	0.1482	0.0326
P. monodon	LTR	NGARO	0	2394347767	0	0
P. monodon	LTR	PAO	2401636	2394347767	0.0046	0.001
P. monodon	SINE	5S	0	2394347767	0	0
P. monodon	SINE	ALU	147693	2394347767	0.0003	0.0001
P. monodon	SINE	B2	5007066	2394347767	0.0095	0.0021
P. monodon	SINE	B4	0	2394347767	0	0
P. monodon	SINE	ID	666916	2394347767	0.0013	0.0003
P. monodon	SINE	MIR	871629	2394347767	0.0017	0.0004
P. monodon	SINE	TRNA	971679	2394347767	0.0018	0.0004
P. monodon	SINE	TRNA-CORE	26912393	2394347767	0.0511	0.0112
P. monodon	SINE	TRNA-CORE-RTE	0	2394347767	0	0
P. monodon	SINE	TRNA-DEU	0	2394347767	0	0
P. monodon	SINE	TRNA-DEU-L2	0	2394347767	0	0
P. monodon	SINE	TRNA-DEU-RTE	0	2394347767	0	0
P. monodon	SINE	TRNA-I	0	2394347767	0	0
P. monodon	SINE	TRNA-L2	0	2394347767	0	0
P. monodon	SINE	TRNA-META	0	2394347767	0	0
P. monodon	SINE	TRNA-RTE	0	2394347767	0	0
P. monodon	SINE	TRNA-V	0	2394347767	0	0
P. monodon	SINE	U	1010345	2394347767	0.0019	0.0004
P. monodon	SINE	U-L1	0	2394347767	0	0
C. sapidus	DNA	ACADEM-1	60999	998040073	0.0006	0.0001
C. sapidus	DNA	CMC-CHAPAEV	0	998040073	0	0
C. sapidus	DNA	CMC-CHAPAEV-3	759127	998040073	0.0075	0.0008
C. sapidus	DNA	CMC-ENSPM	0	998040073	0	0
C. sapidus	DNA	CMC-MIRAGE	0	998040073	0	0
C. sapidus	DNA	CMC-TRANSIB	0	998040073	0	0
C. sapidus	DNA	CRYPTON	0	998040073	0	0
C. sapidus	DNA	CRYPTON-H	0	998040073	0	0
C. sapidus	DNA	CRYPTON-S	0	998040073	0	0
C. sapidus	DNA	CRYPTON-V	0	998040073	0	0
C. sapidus	DNA	CRYPTON-X	0	998040073	0	0
C. sapidus	DNA	DADA	0	998040073	0	0
C. sapidus	DNA	GINGER-1	0	998040073	0	0
C. sapidus	DNA	GINGER-2	272785	998040073	0.0027	0.0003
C. sapidus	DNA	HAT	11614	998040073	0.0001	0
C. sapidus	DNA	HAT-AC	56415	998040073	0.0006	0.0001
C. sapidus	DNA	HAT-BLACKJACK	778041	998040073	0.0077	0.0008
C. sapidus	DNA	HAT-CHARLIE	2090989	998040073	0.0206	0.0021
C. sapidus	DNA	HAT-HAT19	0	998040073	0	0
C. sapidus	DNA	HAT-HAT5	150332	998040073	0.0015	0.0002
C. sapidus	DNA	HAT-HAT6	0	998040073	0	0
C. sapidus	DNA	HAT-HATM	0	998040073	0	0
C. sapidus	DNA	HAT-HATW	0	998040073	0	0
C. sapidus	DNA	HAT-HATX	0	998040073	0	0
C. sapidus	DNA	HAT-PEGASUS	0	998040073	0	0
C. sapidus	DNA	HAT-TAG1	0	998040073	0	0
C. sapidus	DNA	HAT-TIP100	206248	998040073	0.002	0.0002
C. sapidus	DNA	HELITRON	99778	998040073	0.001	0.0001
C. sapidus	DNA	HELITRON-2	0	998040073	0	0
C. sapidus	DNA	IS3EU	10773	998040073	0.0001	0
C. sapidus	DNA	KOLOBOK-E	0	998040073	0	0
C. sapidus	DNA	KOLOBOK-HYDRA	258134	998040073	0.0025	0.0003
C. sapidus	DNA	KOLOBOK-T2	0	998040073	0	0
C. sapidus	DNA	MAVERICK	209495	998040073	0.0021	0.0002
C. sapidus	DNA	MAVERICK-MAVIRUS	0	998040073	0	0
C. sapidus	DNA	MERLIN	169844	998040073	0.0017	0.0002
C. sapidus	DNA	MULE	0	998040073	0	0
C. sapidus	DNA	MULE-MUDR	198364	998040073	0.002	0.0002
C. sapidus	DNA	MULE-NOF	0	998040073	0	0
C. sapidus	DNA	NOVOSIB	0	998040073	0	0
C. sapidus	DNA	P	718880	998040073	0.0071	0.0007
C. sapidus	DNA	PIF-HARBINGER	4619267	998040073	0.0454	0.0046
C. sapidus	DNA	PIF-HARBS	0	998040073	0	0
C. sapidus	DNA	PIF-ISL2EU	283738	998040073	0.0028	0.0003
C. sapidus	DNA	PIF-SPY	0	998040073	0	0
C. sapidus	DNA	PIGGYBAC	1921607	998040073	0.0189	0.0019
C. sapidus	DNA	PIGGYBAC-X	0	998040073	0	0
C. sapidus	DNA	SOLA-1	41109	998040073	0.0004	0
C. sapidus	DNA	SOLA-2	0	998040073	0	0
C. sapidus	DNA	SOLA-3	0	998040073	0	0
C. sapidus	DNA	TCMAR	0	998040073	0	0
C. sapidus	DNA	TCMAR-FOT1	167419	998040073	0.0016	0.0002
C. sapidus	DNA	TCMAR-ISRM11	118511	998040073	0.0012	0.0001
C. sapidus	DNA	TCMAR-M44	85153	998040073	0.0008	0.0001
C. sapidus	DNA	TCMAR-MARINER	198316	998040073	0.002	0.0002
C. sapidus	DNA	TCMAR-POGO	0	998040073	0	0
C. sapidus	DNA	TCMAR-STOWAWAY	0	998040073	0	0
C. sapidus	DNA	TCMAR-TC1	1100833	998040073	0.0108	0.0011
C. sapidus	DNA	TCMAR-TC2	257958	998040073	0.0025	0.0003
C. sapidus	DNA	TCMAR-TC4	0	998040073	0	0
C. sapidus	DNA	TCMAR-TIGGER	5511728	998040073	0.0542	0.0055
C. sapidus	DNA	ZATOR	0	998040073	0	0
C. sapidus	DNA	ZISUPTON	155531	998040073	0.0015	0.0002
C. sapidus	LINE	CR1	12369444	998040073	0.1217	0.0124
C. sapidus	LINE	CR1-ZENON	13285887	998040073	0.1307	0.0133
C. sapidus	LINE	CRE	9007	998040073	0.0001	0
C. sapidus	LINE	DONG-R4	86925	998040073	0.0009	0.0001
C. sapidus	LINE	I	6371774	998040073	0.0627	0.0064
C. sapidus	LINE	I-JOCKEY	2711672	998040073	0.0267	0.0027
C. sapidus	LINE	L1	98745	998040073	0.001	0.0001
C. sapidus	LINE	L1-TX1	0	998040073	0	0
C. sapidus	LINE	L2	6756713	998040073	0.0665	0.0068
C. sapidus	LINE	PENELOPE	809021	998040073	0.008	0.0008
C. sapidus	LINE	PROTO2	132706	998040073	0.0013	0.0001
C. sapidus	LINE	R1	169800	998040073	0.0017	0.0002
C. sapidus	LINE	R1-LOA	0	998040073	0	0
C. sapidus	LINE	R2	299970	998040073	0.003	0.0003
C. sapidus	LINE	R2-NESL	0	998040073	0	0
C. sapidus	LINE	REX-BABAR	709755	998040073	0.007	0.0007
C. sapidus	LINE	RTE	0	998040073	0	0
C. sapidus	LINE	RTE-BOVB	12030622	998040073	0.1183	0.0121
C. sapidus	LINE	RTE-ORTE	0	998040073	0	0
C. sapidus	LINE	RTE-RTE	0	998040073	0	0
C. sapidus	LINE	RTE-X	3963476	998040073	0.039	0.004
C. sapidus	LINE	TAD1	0	998040073	0	0
C. sapidus	LTR	CAULIMOVIRUS	16704	998040073	0.0002	0
C. sapidus	LTR	COPIA	75608	998040073	0.0007	0.0001
C. sapidus	LTR	DIRS	1876814	998040073	0.0185	0.0019
C. sapidus	LTR	ERV1	0	998040073	0	0
C. sapidus	LTR	ERV4	0	998040073	0	0
C. sapidus	LTR	ERVK	0	998040073	0	0
C. sapidus	LTR	ERVL	0	998040073	0	0
C. sapidus	LTR	ERVL-MALR	0	998040073	0	0
C. sapidus	LTR	GYPSY	12609125	998040073	0.124	0.0126
C. sapidus	LTR	NGARO	0	998040073	0	0
C. sapidus	LTR	PAO	3468118	998040073	0.0341	0.0035
C. sapidus	SINE	5S	14232	998040073	0.0001	0
C. sapidus	SINE	ALU	0	998040073	0	0
C. sapidus	SINE	B2	0	998040073	0	0
C. sapidus	SINE	B4	0	998040073	0	0
C. sapidus	SINE	ID	0	998040073	0	0
C. sapidus	SINE	MIR	0	998040073	0	0
C. sapidus	SINE	TRNA	319541	998040073	0.0031	0.0003
C. sapidus	SINE	TRNA-CORE	2964689	998040073	0.0292	0.003
C. sapidus	SINE	TRNA-CORE-RTE	0	998040073	0	0
C. sapidus	SINE	TRNA-DEU	0	998040073	0	0
C. sapidus	SINE	TRNA-DEU-L2	0	998040073	0	0
C. sapidus	SINE	TRNA-DEU-RTE	0	998040073	0	0
C. sapidus	SINE	TRNA-I	0	998040073	0	0
C. sapidus	SINE	TRNA-L2	0	998040073	0	0
C. sapidus	SINE	TRNA-META	0	998040073	0	0
C. sapidus	SINE	TRNA-RTE	0	998040073	0	0
C. sapidus	SINE	TRNA-V	0	998040073	0	0
C. sapidus	SINE	U	0	998040073	0	0
C. sapidus	SINE	U-L1	0	998040073	0	0
H. americanus	DNA	ACADEM-1	8924060	2292076018	0.0174	0.0039
H. americanus	DNA	CMC-CHAPAEV	0	2292076018	0	0
H. americanus	DNA	CMC-CHAPAEV-3	3177604	2292076018	0.0062	0.0014
H. americanus	DNA	CMC-ENSPM	23560841	2292076018	0.0459	0.0103
H. americanus	DNA	CMC-MIRAGE	0	2292076018	0	0
H. americanus	DNA	CMC-TRANSIB	0	2292076018	0	0
H. americanus	DNA	CRYPTON	0	2292076018	0	0
H. americanus	DNA	CRYPTON-H	0	2292076018	0	0
H. americanus	DNA	CRYPTON-S	0	2292076018	0	0
H. americanus	DNA	CRYPTON-V	0	2292076018	0	0
H. americanus	DNA	CRYPTON-X	0	2292076018	0	0
H. americanus	DNA	DADA	0	2292076018	0	0
H. americanus	DNA	GINGER-1	0	2292076018	0	0
H. americanus	DNA	GINGER-2	178050	2292076018	0.0003	0.0001
H. americanus	DNA	HAT	579921	2292076018	0.0011	0.0003
H. americanus	DNA	HAT-AC	2189964	2292076018	0.0043	0.001
H. americanus	DNA	HAT-BLACKJACK	1167233	2292076018	0.0023	0.0005
H. americanus	DNA	HAT-CHARLIE	5845309	2292076018	0.0114	0.0026
H. americanus	DNA	HAT-HAT19	229024	2292076018	0.0004	0.0001
H. americanus	DNA	HAT-HAT5	0	2292076018	0	0
H. americanus	DNA	HAT-HAT6	0	2292076018	0	0
H. americanus	DNA	HAT-HATM	18470505	2292076018	0.036	0.0081
H. americanus	DNA	HAT-HATW	0	2292076018	0	0
H. americanus	DNA	HAT-HATX	0	2292076018	0	0
H. americanus	DNA	HAT-PEGASUS	0	2292076018	0	0
H. americanus	DNA	HAT-TAG1	408505	2292076018	0.0008	0.0002
H. americanus	DNA	HAT-TIP100	5250774	2292076018	0.0102	0.0023
H. americanus	DNA	HELITRON	8463014	2292076018	0.0165	0.0037
H. americanus	DNA	HELITRON-2	0	2292076018	0	0
H. americanus	DNA	IS3EU	0	2292076018	0	0
H. americanus	DNA	KOLOBOK-E	0	2292076018	0	0
H. americanus	DNA	KOLOBOK-HYDRA	0	2292076018	0	0
H. americanus	DNA	KOLOBOK-T2	0	2292076018	0	0
H. americanus	DNA	MAVERICK	0	2292076018	0	0
H. americanus	DNA	MAVERICK-MAVIRUS	0	2292076018	0	0
H. americanus	DNA	MERLIN	628173	2292076018	0.0012	0.0003
H. americanus	DNA	MULE	0	2292076018	0	0
H. americanus	DNA	MULE-MUDR	516333	2292076018	0.001	0.0002
H. americanus	DNA	MULE-NOF	0	2292076018	0	0
H. americanus	DNA	NOVOSIB	0	2292076018	0	0
H. americanus	DNA	P	1784217	2292076018	0.0035	0.0008
H. americanus	DNA	PIF-HARBINGER	2279793	2292076018	0.0044	0.001
H. americanus	DNA	PIF-HARBS	0	2292076018	0	0
H. americanus	DNA	PIF-ISL2EU	0	2292076018	0	0
H. americanus	DNA	PIF-SPY	0	2292076018	0	0
H. americanus	DNA	PIGGYBAC	206731	2292076018	0.0004	0.0001
H. americanus	DNA	PIGGYBAC-X	0	2292076018	0	0
H. americanus	DNA	SOLA-1	0	2292076018	0	0
H. americanus	DNA	SOLA-2	0	2292076018	0	0
H. americanus	DNA	SOLA-3	1276965	2292076018	0.0025	0.0006
H. americanus	DNA	TCMAR	0	2292076018	0	0
H. americanus	DNA	TCMAR-FOT1	0	2292076018	0	0
H. americanus	DNA	TCMAR-ISRM11	852893	2292076018	0.0017	0.0004
H. americanus	DNA	TCMAR-M44	189079	2292076018	0.0004	0.0001
H. americanus	DNA	TCMAR-MARINER	311006	2292076018	0.0006	0.0001
H. americanus	DNA	TCMAR-POGO	0	2292076018	0	0
H. americanus	DNA	TCMAR-STOWAWAY	0	2292076018	0	0
H. americanus	DNA	TCMAR-TC1	4266163	2292076018	0.0083	0.0019
H. americanus	DNA	TCMAR-TC2	4341599	2292076018	0.0085	0.0019
H. americanus	DNA	TCMAR-TC4	0	2292076018	0	0
H. americanus	DNA	TCMAR-TIGGER	56952399	2292076018	0.111	0.0248
H. americanus	DNA	ZATOR	0	2292076018	0	0
H. americanus	DNA	ZISUPTON	0	2292076018	0	0
H. americanus	LINE	CR1	104137156	2292076018	0.203	0.0454
H. americanus	LINE	CR1-ZENON	7783798	2292076018	0.0152	0.0034
H. americanus	LINE	CRE	16773644	2292076018	0.0327	0.0073
H. americanus	LINE	DONG-R4	0	2292076018	0	0
H. americanus	LINE	I	42277090	2292076018	0.0824	0.0184
H. americanus	LINE	I-JOCKEY	14707795	2292076018	0.0287	0.0064
H. americanus	LINE	L1	2400263	2292076018	0.0047	0.001
H. americanus	LINE	L1-TX1	467566	2292076018	0.0009	0.0002
H. americanus	LINE	L2	7304554	2292076018	0.0142	0.0032
H. americanus	LINE	PENELOPE	14133585	2292076018	0.0276	0.0062
H. americanus	LINE	PROTO2	0	2292076018	0	0
H. americanus	LINE	R1	0	2292076018	0	0
H. americanus	LINE	R1-LOA	0	2292076018	0	0
H. americanus	LINE	R2	472092	2292076018	0.0009	0.0002
H. americanus	LINE	R2-NESL	458792	2292076018	0.0009	0.0002
H. americanus	LINE	REX-BABAR	4642963	2292076018	0.0091	0.002
H. americanus	LINE	RTE	0	2292076018	0	0
H. americanus	LINE	RTE-BOVB	37919258	2292076018	0.0739	0.0165
H. americanus	LINE	RTE-ORTE	0	2292076018	0	0
H. americanus	LINE	RTE-RTE	1763041	2292076018	0.0034	0.0008
H. americanus	LINE	RTE-X	116841	2292076018	0.0002	0.0001
H. americanus	LINE	TAD1	0	2292076018	0	0
H. americanus	LTR	CAULIMOVIRUS	0	2292076018	0	0
H. americanus	LTR	COPIA	15711541	2292076018	0.0306	0.0069
H. americanus	LTR	DIRS	2211900	2292076018	0.0043	0.001
H. americanus	LTR	ERV1	242899	2292076018	0.0005	0.0001
H. americanus	LTR	ERV4	0	2292076018	0	0
H. americanus	LTR	ERVK	0	2292076018	0	0
H. americanus	LTR	ERVL	0	2292076018	0	0
H. americanus	LTR	ERVL-MALR	0	2292076018	0	0
H. americanus	LTR	GYPSY	77540998	2292076018	0.1512	0.0338
H. americanus	LTR	NGARO	0	2292076018	0	0
H. americanus	LTR	PAO	1978645	2292076018	0.0039	0.0009
H. americanus	SINE	5S	137668	2292076018	0.0003	0.0001
H. americanus	SINE	ALU	0	2292076018	0	0
H. americanus	SINE	B2	0	2292076018	0	0
H. americanus	SINE	B4	0	2292076018	0	0
H. americanus	SINE	ID	0	2292076018	0	0
H. americanus	SINE	MIR	0	2292076018	0	0
H. americanus	SINE	TRNA	970327	2292076018	0.0019	0.0004
H. americanus	SINE	TRNA-CORE	2202171	2292076018	0.0043	0.001
H. americanus	SINE	TRNA-CORE-RTE	0	2292076018	0	0
H. americanus	SINE	TRNA-DEU	0	2292076018	0	0
H. americanus	SINE	TRNA-DEU-L2	3070394	2292076018	0.006	0.0013
H. americanus	SINE	TRNA-DEU-RTE	0	2292076018	0	0
H. americanus	SINE	TRNA-I	0	2292076018	0	0
H. americanus	SINE	TRNA-L2	358682	2292076018	0.0007	0.0002
H. americanus	SINE	TRNA-META	0	2292076018	0	0
H. americanus	SINE	TRNA-RTE	0	2292076018	0	0
H. americanus	SINE	TRNA-V	920945	2292076018	0.0018	0.0004
H. americanus	SINE	U	196105	2292076018	0.0004	0.0001
H. americanus	SINE	U-L1	0	2292076018	0	0
S. paramamosain	DNA	ACADEM-1	0	1546139864	0	0
S. paramamosain	DNA	CMC-CHAPAEV	0	1546139864	0	0
S. paramamosain	DNA	CMC-CHAPAEV-3	1605548	1546139864	0.0037	0.001
S. paramamosain	DNA	CMC-ENSPM	2516206	1546139864	0.0058	0.0016
S. paramamosain	DNA	CMC-MIRAGE	0	1546139864	0	0
S. paramamosain	DNA	CMC-TRANSIB	0	1546139864	0	0
S. paramamosain	DNA	CRYPTON	0	1546139864	0	0
S. paramamosain	DNA	CRYPTON-H	508946	1546139864	0.0012	0.0003
S. paramamosain	DNA	CRYPTON-S	0	1546139864	0	0
S. paramamosain	DNA	CRYPTON-V	0	1546139864	0	0
S. paramamosain	DNA	CRYPTON-X	0	1546139864	0	0
S. paramamosain	DNA	DADA	0	1546139864	0	0
S. paramamosain	DNA	GINGER-1	343560	1546139864	0.0008	0.0002
S. paramamosain	DNA	GINGER-2	1489908	1546139864	0.0034	0.001
S. paramamosain	DNA	HAT	147044	1546139864	0.0003	0.0001
S. paramamosain	DNA	HAT-AC	1869654	1546139864	0.0043	0.0012
S. paramamosain	DNA	HAT-BLACKJACK	2798071	1546139864	0.0064	0.0018
S. paramamosain	DNA	HAT-CHARLIE	4892652	1546139864	0.0112	0.0032
S. paramamosain	DNA	HAT-HAT19	27039	1546139864	0.0001	0
S. paramamosain	DNA	HAT-HAT5	0	1546139864	0	0
S. paramamosain	DNA	HAT-HAT6	0	1546139864	0	0
S. paramamosain	DNA	HAT-HATM	326125	1546139864	0.0007	0.0002
S. paramamosain	DNA	HAT-HATW	0	1546139864	0	0
S. paramamosain	DNA	HAT-HATX	0	1546139864	0	0
S. paramamosain	DNA	HAT-PEGASUS	0	1546139864	0	0
S. paramamosain	DNA	HAT-TAG1	178741	1546139864	0.0004	0.0001
S. paramamosain	DNA	HAT-TIP100	417938	1546139864	0.001	0.0003
S. paramamosain	DNA	HELITRON	1841345	1546139864	0.0042	0.0012
S. paramamosain	DNA	HELITRON-2	0	1546139864	0	0
S. paramamosain	DNA	IS3EU	0	1546139864	0	0
S. paramamosain	DNA	KOLOBOK-E	0	1546139864	0	0
S. paramamosain	DNA	KOLOBOK-HYDRA	496012	1546139864	0.0011	0.0003
S. paramamosain	DNA	KOLOBOK-T2	0	1546139864	0	0
S. paramamosain	DNA	MAVERICK	5959487	1546139864	0.0136	0.0039
S. paramamosain	DNA	MAVERICK-MAVIRUS	0	1546139864	0	0
S. paramamosain	DNA	MERLIN	630412	1546139864	0.0014	0.0004
S. paramamosain	DNA	MULE	0	1546139864	0	0
S. paramamosain	DNA	MULE-MUDR	2451728	1546139864	0.0056	0.0016
S. paramamosain	DNA	MULE-NOF	0	1546139864	0	0
S. paramamosain	DNA	NOVOSIB	116122	1546139864	0.0003	0.0001
S. paramamosain	DNA	P	497972	1546139864	0.0011	0.0003
S. paramamosain	DNA	PIF-HARBINGER	8313801	1546139864	0.019	0.0054
S. paramamosain	DNA	PIF-HARBS	0	1546139864	0	0
S. paramamosain	DNA	PIF-ISL2EU	430023	1546139864	0.001	0.0003
S. paramamosain	DNA	PIF-SPY	0	1546139864	0	0
S. paramamosain	DNA	PIGGYBAC	2705242	1546139864	0.0062	0.0017
S. paramamosain	DNA	PIGGYBAC-X	0	1546139864	0	0
S. paramamosain	DNA	SOLA-1	1654766	1546139864	0.0038	0.0011
S. paramamosain	DNA	SOLA-2	0	1546139864	0	0
S. paramamosain	DNA	SOLA-3	0	1546139864	0	0
S. paramamosain	DNA	TCMAR	0	1546139864	0	0
S. paramamosain	DNA	TCMAR-FOT1	470279	1546139864	0.0011	0.0003
S. paramamosain	DNA	TCMAR-ISRM11	0	1546139864	0	0
S. paramamosain	DNA	TCMAR-M44	231847	1546139864	0.0005	0.0001
S. paramamosain	DNA	TCMAR-MARINER	38033405	1546139864	0.0871	0.0246
S. paramamosain	DNA	TCMAR-POGO	0	1546139864	0	0
S. paramamosain	DNA	TCMAR-STOWAWAY	0	1546139864	0	0
S. paramamosain	DNA	TCMAR-TC1	1213367	1546139864	0.0028	0.0008
S. paramamosain	DNA	TCMAR-TC2	1625365	1546139864	0.0037	0.0011
S. paramamosain	DNA	TCMAR-TC4	0	1546139864	0	0
S. paramamosain	DNA	TCMAR-TIGGER	7262229	1546139864	0.0166	0.0047
S. paramamosain	DNA	ZATOR	0	1546139864	0	0
S. paramamosain	DNA	ZISUPTON	0	1546139864	0	0
S. paramamosain	LINE	CR1	75400325	1546139864	0.1726	0.0488
S. paramamosain	LINE	CR1-ZENON	144659541	1546139864	0.3311	0.0936
S. paramamosain	LINE	CRE	1109221	1546139864	0.0025	0.0007
S. paramamosain	LINE	DONG-R4	204169	1546139864	0.0005	0.0001
S. paramamosain	LINE	I	10217519	1546139864	0.0234	0.0066
S. paramamosain	LINE	I-JOCKEY	10187479	1546139864	0.0233	0.0066
S. paramamosain	LINE	L1	247757	1546139864	0.0006	0.0002
S. paramamosain	LINE	L1-TX1	0	1546139864	0	0
S. paramamosain	LINE	L2	8153314	1546139864	0.0187	0.0053
S. paramamosain	LINE	PENELOPE	2662122	1546139864	0.0061	0.0017
S. paramamosain	LINE	PROTO2	759839	1546139864	0.0017	0.0005
S. paramamosain	LINE	R1	593817	1546139864	0.0014	0.0004
S. paramamosain	LINE	R1-LOA	0	1546139864	0	0
S. paramamosain	LINE	R2	548717	1546139864	0.0013	0.0004
S. paramamosain	LINE	R2-NESL	0	1546139864	0	0
S. paramamosain	LINE	REX-BABAR	2295550	1546139864	0.0053	0.0015
S. paramamosain	LINE	RTE	0	1546139864	0	0
S. paramamosain	LINE	RTE-BOVB	10150142	1546139864	0.0232	0.0066
S. paramamosain	LINE	RTE-ORTE	0	1546139864	0	0
S. paramamosain	LINE	RTE-RTE	1624061	1546139864	0.0037	0.0011
S. paramamosain	LINE	RTE-X	9546455	1546139864	0.0219	0.0062
S. paramamosain	LINE	TAD1	0	1546139864	0	0
S. paramamosain	LTR	CAULIMOVIRUS	0	1546139864	0	0
S. paramamosain	LTR	COPIA	1673084	1546139864	0.0038	0.0011
S. paramamosain	LTR	DIRS	5582746	1546139864	0.0128	0.0036
S. paramamosain	LTR	ERV1	1077316	1546139864	0.0025	0.0007
S. paramamosain	LTR	ERV4	397029	1546139864	0.0009	0.0003
S. paramamosain	LTR	ERVK	1091387	1546139864	0.0025	0.0007
S. paramamosain	LTR	ERVL	0	1546139864	0	0
S. paramamosain	LTR	ERVL-MALR	495986	1546139864	0.0011	0.0003
S. paramamosain	LTR	GYPSY	35075717	1546139864	0.0803	0.0227
S. paramamosain	LTR	NGARO	0	1546139864	0	0
S. paramamosain	LTR	PAO	17569993	1546139864	0.0402	0.0114
S. paramamosain	SINE	5S	1554272	1546139864	0.0036	0.001
S. paramamosain	SINE	ALU	0	1546139864	0	0
S. paramamosain	SINE	B2	0	1546139864	0	0
S. paramamosain	SINE	B4	394233	1546139864	0.0009	0.0003
S. paramamosain	SINE	ID	0	1546139864	0	0
S. paramamosain	SINE	MIR	0	1546139864	0	0
S. paramamosain	SINE	TRNA	20963	1546139864	0	0
S. paramamosain	SINE	TRNA-CORE	1740939	1546139864	0.004	0.0011
S. paramamosain	SINE	TRNA-CORE-RTE	194092	1546139864	0.0004	0.0001
S. paramamosain	SINE	TRNA-DEU	0	1546139864	0	0
S. paramamosain	SINE	TRNA-DEU-L2	425301	1546139864	0.001	0.0003
S. paramamosain	SINE	TRNA-DEU-RTE	0	1546139864	0	0
S. paramamosain	SINE	TRNA-I	0	1546139864	0	0
S. paramamosain	SINE	TRNA-L2	0	1546139864	0	0
S. paramamosain	SINE	TRNA-META	0	1546139864	0	0
S. paramamosain	SINE	TRNA-RTE	0	1546139864	0	0
S. paramamosain	SINE	TRNA-V	0	1546139864	0	0
S. paramamosain	SINE	U	144627	1546139864	0.0003	0.0001
S. paramamosain	SINE	U-L1	0	1546139864	0	0
P. japonicus	DNA	ACADEM-1	0	1705010925	0	0
P. japonicus	DNA	CMC-CHAPAEV	0	1705010925	0	0
P. japonicus	DNA	CMC-CHAPAEV-3	227650	1705010925	0.0019	0.0001
P. japonicus	DNA	CMC-ENSPM	9535436	1705010925	0.0797	0.0056
P. japonicus	DNA	CMC-MIRAGE	0	1705010925	0	0
P. japonicus	DNA	CMC-TRANSIB	0	1705010925	0	0
P. japonicus	DNA	CRYPTON	0	1705010925	0	0
P. japonicus	DNA	CRYPTON-H	0	1705010925	0	0
P. japonicus	DNA	CRYPTON-S	0	1705010925	0	0
P. japonicus	DNA	CRYPTON-V	0	1705010925	0	0
P. japonicus	DNA	CRYPTON-X	0	1705010925	0	0
P. japonicus	DNA	DADA	0	1705010925	0	0
P. japonicus	DNA	GINGER-1	0	1705010925	0	0
P. japonicus	DNA	GINGER-2	303927	1705010925	0.0025	0.0002
P. japonicus	DNA	HAT	56969	1705010925	0.0005	0
P. japonicus	DNA	HAT-AC	911565	1705010925	0.0076	0.0005
P. japonicus	DNA	HAT-BLACKJACK	0	1705010925	0	0
P. japonicus	DNA	HAT-CHARLIE	569755	1705010925	0.0048	0.0003
P. japonicus	DNA	HAT-HAT19	0	1705010925	0	0
P. japonicus	DNA	HAT-HAT5	0	1705010925	0	0
P. japonicus	DNA	HAT-HAT6	0	1705010925	0	0
P. japonicus	DNA	HAT-HATM	278657	1705010925	0.0023	0.0002
P. japonicus	DNA	HAT-HATW	0	1705010925	0	0
P. japonicus	DNA	HAT-HATX	0	1705010925	0	0
P. japonicus	DNA	HAT-PEGASUS	0	1705010925	0	0
P. japonicus	DNA	HAT-TAG1	0	1705010925	0	0
P. japonicus	DNA	HAT-TIP100	189332	1705010925	0.0016	0.0001
P. japonicus	DNA	HELITRON	29951	1705010925	0.0003	0
P. japonicus	DNA	HELITRON-2	0	1705010925	0	0
P. japonicus	DNA	IS3EU	0	1705010925	0	0
P. japonicus	DNA	KOLOBOK-E	0	1705010925	0	0
P. japonicus	DNA	KOLOBOK-HYDRA	0	1705010925	0	0
P. japonicus	DNA	KOLOBOK-T2	111229	1705010925	0.0009	0.0001
P. japonicus	DNA	MAVERICK	83389	1705010925	0.0007	0
P. japonicus	DNA	MAVERICK-MAVIRUS	0	1705010925	0	0
P. japonicus	DNA	MERLIN	993103	1705010925	0.0083	0.0006
P. japonicus	DNA	MULE	0	1705010925	0	0
P. japonicus	DNA	MULE-MUDR	104580	1705010925	0.0009	0.0001
P. japonicus	DNA	MULE-NOF	0	1705010925	0	0
P. japonicus	DNA	NOVOSIB	0	1705010925	0	0
P. japonicus	DNA	P	0	1705010925	0	0
P. japonicus	DNA	PIF-HARBINGER	410417	1705010925	0.0034	0.0002
P. japonicus	DNA	PIF-HARBS	0	1705010925	0	0
P. japonicus	DNA	PIF-ISL2EU	0	1705010925	0	0
P. japonicus	DNA	PIF-SPY	0	1705010925	0	0
P. japonicus	DNA	PIGGYBAC	230574	1705010925	0.0019	0.0001
P. japonicus	DNA	PIGGYBAC-X	0	1705010925	0	0
P. japonicus	DNA	SOLA-1	0	1705010925	0	0
P. japonicus	DNA	SOLA-2	0	1705010925	0	0
P. japonicus	DNA	SOLA-3	0	1705010925	0	0
P. japonicus	DNA	TCMAR	0	1705010925	0	0
P. japonicus	DNA	TCMAR-FOT1	0	1705010925	0	0
P. japonicus	DNA	TCMAR-ISRM11	0	1705010925	0	0
P. japonicus	DNA	TCMAR-M44	0	1705010925	0	0
P. japonicus	DNA	TCMAR-MARINER	166823	1705010925	0.0014	0.0001
P. japonicus	DNA	TCMAR-POGO	0	1705010925	0	0
P. japonicus	DNA	TCMAR-STOWAWAY	0	1705010925	0	0
P. japonicus	DNA	TCMAR-TC1	864066	1705010925	0.0072	0.0005
P. japonicus	DNA	TCMAR-TC2	0	1705010925	0	0
P. japonicus	DNA	TCMAR-TC4	0	1705010925	0	0
P. japonicus	DNA	TCMAR-TIGGER	2126325	1705010925	0.0178	0.0012
P. japonicus	DNA	ZATOR	0	1705010925	0	0
P. japonicus	DNA	ZISUPTON	46005	1705010925	0.0004	0
P. japonicus	LINE	CR1	4038335	1705010925	0.0337	0.0024
P. japonicus	LINE	CR1-ZENON	53510	1705010925	0.0004	0
P. japonicus	LINE	CRE	473505	1705010925	0.004	0.0003
P. japonicus	LINE	DONG-R4	174162	1705010925	0.0015	0.0001
P. japonicus	LINE	I	48506582	1705010925	0.4053	0.0284
P. japonicus	LINE	I-JOCKEY	2161260	1705010925	0.0181	0.0013
P. japonicus	LINE	L1	0	1705010925	0	0
P. japonicus	LINE	L1-TX1	0	1705010925	0	0
P. japonicus	LINE	L2	3570395	1705010925	0.0298	0.0021
P. japonicus	LINE	PENELOPE	15850813	1705010925	0.1325	0.0093
P. japonicus	LINE	PROTO2	33040	1705010925	0.0003	0
P. japonicus	LINE	R1	5571518	1705010925	0.0466	0.0033
P. japonicus	LINE	R1-LOA	0	1705010925	0	0
P. japonicus	LINE	R2	0	1705010925	0	0
P. japonicus	LINE	R2-NESL	0	1705010925	0	0
P. japonicus	LINE	REX-BABAR	69926	1705010925	0.0006	0
P. japonicus	LINE	RTE	0	1705010925	0	0
P. japonicus	LINE	RTE-BOVB	5776918	1705010925	0.0483	0.0034
P. japonicus	LINE	RTE-ORTE	0	1705010925	0	0
P. japonicus	LINE	RTE-RTE	6832491	1705010925	0.0571	0.004
P. japonicus	LINE	RTE-X	0	1705010925	0	0
P. japonicus	LINE	TAD1	0	1705010925	0	0
P. japonicus	LTR	CAULIMOVIRUS	0	1705010925	0	0
P. japonicus	LTR	COPIA	223750	1705010925	0.0019	0.0001
P. japonicus	LTR	DIRS	0	1705010925	0	0
P. japonicus	LTR	ERV1	0	1705010925	0	0
P. japonicus	LTR	ERV4	0	1705010925	0	0
P. japonicus	LTR	ERVK	0	1705010925	0	0
P. japonicus	LTR	ERVL	0	1705010925	0	0
P. japonicus	LTR	ERVL-MALR	0	1705010925	0	0
P. japonicus	LTR	GYPSY	4356615	1705010925	0.0364	0.0026
P. japonicus	LTR	NGARO	0	1705010925	0	0
P. japonicus	LTR	PAO	519063	1705010925	0.0043	0.0003
P. japonicus	SINE	5S	0	1705010925	0	0
P. japonicus	SINE	ALU	0	1705010925	0	0
P. japonicus	SINE	B2	0	1705010925	0	0
P. japonicus	SINE	B4	0	1705010925	0	0
P. japonicus	SINE	ID	19632	1705010925	0.0002	0
P. japonicus	SINE	MIR	335040	1705010925	0.0028	0.0002
P. japonicus	SINE	TRNA	3838649	1705010925	0.0321	0.0023
P. japonicus	SINE	TRNA-CORE	0	1705010925	0	0
P. japonicus	SINE	TRNA-CORE-RTE	0	1705010925	0	0
P. japonicus	SINE	TRNA-DEU	0	1705010925	0	0
P. japonicus	SINE	TRNA-DEU-L2	0	1705010925	0	0
P. japonicus	SINE	TRNA-DEU-RTE	0	1705010925	0	0
P. japonicus	SINE	TRNA-I	23610	1705010925	0.0002	0
P. japonicus	SINE	TRNA-L2	0	1705010925	0	0
P. japonicus	SINE	TRNA-META	0	1705010925	0	0
P. japonicus	SINE	TRNA-RTE	0	1705010925	0	0
P. japonicus	SINE	TRNA-V	0	1705010925	0	0
P. japonicus	SINE	U	0	1705010925	0	0
P. japonicus	SINE	U-L1	0	1705010925	0	0
E. j. sinensis_SA	DNA	ACADEM-1	627148	1765827443	0.0019	0.0004
E. j. sinensis_SA	DNA	CMC-CHAPAEV	0	1765827443	0	0
E. j. sinensis_SA	DNA	CMC-CHAPAEV-3	707101	1765827443	0.0021	0.0004
E. j. sinensis_SA	DNA	CMC-ENSPM	8755183	1765827443	0.026	0.005
E. j. sinensis_SA	DNA	CMC-MIRAGE	0	1765827443	0	0
E. j. sinensis_SA	DNA	CMC-TRANSIB	183596	1765827443	0.0005	0.0001
E. j. sinensis_SA	DNA	CRYPTON	0	1765827443	0	0
E. j. sinensis_SA	DNA	CRYPTON-H	0	1765827443	0	0
E. j. sinensis_SA	DNA	CRYPTON-S	196464	1765827443	0.0006	0.0001
E. j. sinensis_SA	DNA	CRYPTON-V	0	1765827443	0	0
E. j. sinensis_SA	DNA	CRYPTON-X	0	1765827443	0	0
E. j. sinensis_SA	DNA	DADA	0	1765827443	0	0
E. j. sinensis_SA	DNA	GINGER-1	375509	1765827443	0.0011	0.0002
E. j. sinensis_SA	DNA	GINGER-2	0	1765827443	0	0
E. j. sinensis_SA	DNA	HAT	864570	1765827443	0.0026	0.0005
E. j. sinensis_SA	DNA	HAT-AC	1550298	1765827443	0.0046	0.0009
E. j. sinensis_SA	DNA	HAT-BLACKJACK	2166657	1765827443	0.0064	0.0012
E. j. sinensis_SA	DNA	HAT-CHARLIE	2491559	1765827443	0.0074	0.0014
E. j. sinensis_SA	DNA	HAT-HAT19	0	1765827443	0	0
E. j. sinensis_SA	DNA	HAT-HAT5	0	1765827443	0	0
E. j. sinensis_SA	DNA	HAT-HAT6	38132	1765827443	0.0001	0
E. j. sinensis_SA	DNA	HAT-HATM	355601	1765827443	0.0011	0.0002
E. j. sinensis_SA	DNA	HAT-HATW	0	1765827443	0	0
E. j. sinensis_SA	DNA	HAT-HATX	212025	1765827443	0.0006	0.0001
E. j. sinensis_SA	DNA	HAT-PEGASUS	48731	1765827443	0.0001	0
E. j. sinensis_SA	DNA	HAT-TAG1	1510879	1765827443	0.0045	0.0009
E. j. sinensis_SA	DNA	HAT-TIP100	3738689	1765827443	0.0111	0.0021
E. j. sinensis_SA	DNA	HELITRON	3170645	1765827443	0.0094	0.0018
E. j. sinensis_SA	DNA	HELITRON-2	0	1765827443	0	0
E. j. sinensis_SA	DNA	IS3EU	0	1765827443	0	0
E. j. sinensis_SA	DNA	KOLOBOK-E	0	1765827443	0	0
E. j. sinensis_SA	DNA	KOLOBOK-HYDRA	683795	1765827443	0.002	0.0004
E. j. sinensis_SA	DNA	KOLOBOK-T2	0	1765827443	0	0
E. j. sinensis_SA	DNA	MAVERICK	6410260	1765827443	0.019	0.0036
E. j. sinensis_SA	DNA	MAVERICK-MAVIRUS	0	1765827443	0	0
E. j. sinensis_SA	DNA	MERLIN	209263	1765827443	0.0006	0.0001
E. j. sinensis_SA	DNA	MULE	0	1765827443	0	0
E. j. sinensis_SA	DNA	MULE-MUDR	1851182	1765827443	0.0055	0.001
E. j. sinensis_SA	DNA	MULE-NOF	0	1765827443	0	0
E. j. sinensis_SA	DNA	NOVOSIB	208226	1765827443	0.0006	0.0001
E. j. sinensis_SA	DNA	P	2846198	1765827443	0.0085	0.0016
E. j. sinensis_SA	DNA	PIF-HARBINGER	3342588	1765827443	0.0099	0.0019
E. j. sinensis_SA	DNA	PIF-HARBS	0	1765827443	0	0
E. j. sinensis_SA	DNA	PIF-ISL2EU	95492	1765827443	0.0003	0.0001
E. j. sinensis_SA	DNA	PIF-SPY	0	1765827443	0	0
E. j. sinensis_SA	DNA	PIGGYBAC	1266479	1765827443	0.0038	0.0007
E. j. sinensis_SA	DNA	PIGGYBAC-X	0	1765827443	0	0
E. j. sinensis_SA	DNA	SOLA-1	457284	1765827443	0.0014	0.0003
E. j. sinensis_SA	DNA	SOLA-2	0	1765827443	0	0
E. j. sinensis_SA	DNA	SOLA-3	0	1765827443	0	0
E. j. sinensis_SA	DNA	TCMAR	0	1765827443	0	0
E. j. sinensis_SA	DNA	TCMAR-FOT1	1896626	1765827443	0.0056	0.0011
E. j. sinensis_SA	DNA	TCMAR-ISRM11	0	1765827443	0	0
E. j. sinensis_SA	DNA	TCMAR-M44	900258	1765827443	0.0027	0.0005
E. j. sinensis_SA	DNA	TCMAR-MARINER	135377	1765827443	0.0004	0.0001
E. j. sinensis_SA	DNA	TCMAR-POGO	0	1765827443	0	0
E. j. sinensis_SA	DNA	TCMAR-STOWAWAY	0	1765827443	0	0
E. j. sinensis_SA	DNA	TCMAR-TC1	759682	1765827443	0.0023	0.0004
E. j. sinensis_SA	DNA	TCMAR-TC2	1329039	1765827443	0.0039	0.0008
E. j. sinensis_SA	DNA	TCMAR-TC4	696782	1765827443	0.0021	0.0004
E. j. sinensis_SA	DNA	TCMAR-TIGGER	3608168	1765827443	0.0107	0.002
E. j. sinensis_SA	DNA	ZATOR	0	1765827443	0	0
E. j. sinensis_SA	DNA	ZISUPTON	0	1765827443	0	0
E. j. sinensis_SA	LINE	CR1	113099820	1765827443	0.3361	0.064
E. j. sinensis_SA	LINE	CR1-ZENON	64287396	1765827443	0.191	0.0364
E. j. sinensis_SA	LINE	CRE	6009344	1765827443	0.0179	0.0034
E. j. sinensis_SA	LINE	DONG-R4	0	1765827443	0	0
E. j. sinensis_SA	LINE	I	9622458	1765827443	0.0286	0.0054
E. j. sinensis_SA	LINE	I-JOCKEY	2628456	1765827443	0.0078	0.0015
E. j. sinensis_SA	LINE	L1	640580	1765827443	0.0019	0.0004
E. j. sinensis_SA	LINE	L1-TX1	0	1765827443	0	0
E. j. sinensis_SA	LINE	L2	7469110	1765827443	0.0222	0.0042
E. j. sinensis_SA	LINE	PENELOPE	1324212	1765827443	0.0039	0.0007
E. j. sinensis_SA	LINE	PROTO2	103830	1765827443	0.0003	0.0001
E. j. sinensis_SA	LINE	R1	873586	1765827443	0.0026	0.0005
E. j. sinensis_SA	LINE	R1-LOA	0	1765827443	0	0
E. j. sinensis_SA	LINE	R2	803974	1765827443	0.0024	0.0005
E. j. sinensis_SA	LINE	R2-NESL	0	1765827443	0	0
E. j. sinensis_SA	LINE	REX-BABAR	1929451	1765827443	0.0057	0.0011
E. j. sinensis_SA	LINE	RTE	332057	1765827443	0.001	0.0002
E. j. sinensis_SA	LINE	RTE-BOVB	18133714	1765827443	0.0539	0.0103
E. j. sinensis_SA	LINE	RTE-ORTE	0	1765827443	0	0
E. j. sinensis_SA	LINE	RTE-RTE	3675654	1765827443	0.0109	0.0021
E. j. sinensis_SA	LINE	RTE-X	2629716	1765827443	0.0078	0.0015
E. j. sinensis_SA	LINE	TAD1	472180	1765827443	0.0014	0.0003
E. j. sinensis_SA	LTR	CAULIMOVIRUS	222933	1765827443	0.0007	0.0001
E. j. sinensis_SA	LTR	COPIA	2093931	1765827443	0.0062	0.0012
E. j. sinensis_SA	LTR	DIRS	643273	1765827443	0.0019	0.0004
E. j. sinensis_SA	LTR	ERV1	66839	1765827443	0.0002	0
E. j. sinensis_SA	LTR	ERV4	0	1765827443	0	0
E. j. sinensis_SA	LTR	ERVK	756978	1765827443	0.0022	0.0004
E. j. sinensis_SA	LTR	ERVL	0	1765827443	0	0
E. j. sinensis_SA	LTR	ERVL-MALR	0	1765827443	0	0
E. j. sinensis_SA	LTR	GYPSY	31571903	1765827443	0.0938	0.0179
E. j. sinensis_SA	LTR	NGARO	413048	1765827443	0.0012	0.0002
E. j. sinensis_SA	LTR	PAO	1045350	1765827443	0.0031	0.0006
E. j. sinensis_SA	SINE	5S	288174	1765827443	0.0009	0.0002
E. j. sinensis_SA	SINE	ALU	0	1765827443	0	0
E. j. sinensis_SA	SINE	B2	0	1765827443	0	0
E. j. sinensis_SA	SINE	B4	0	1765827443	0	0
E. j. sinensis_SA	SINE	ID	0	1765827443	0	0
E. j. sinensis_SA	SINE	MIR	0	1765827443	0	0
E. j. sinensis_SA	SINE	TRNA	7566392	1765827443	0.0225	0.0043
E. j. sinensis_SA	SINE	TRNA-CORE	4089584	1765827443	0.0122	0.0023
E. j. sinensis_SA	SINE	TRNA-CORE-RTE	0	1765827443	0	0
E. j. sinensis_SA	SINE	TRNA-DEU	0	1765827443	0	0
E. j. sinensis_SA	SINE	TRNA-DEU-L2	0	1765827443	0	0
E. j. sinensis_SA	SINE	TRNA-DEU-RTE	0	1765827443	0	0
E. j. sinensis_SA	SINE	TRNA-I	0	1765827443	0	0
E. j. sinensis_SA	SINE	TRNA-L2	0	1765827443	0	0
E. j. sinensis_SA	SINE	TRNA-META	0	1765827443	0	0
E. j. sinensis_SA	SINE	TRNA-RTE	0	1765827443	0	0
E. j. sinensis_SA	SINE	TRNA-V	0	1765827443	0	0
E. j. sinensis_SA	SINE	U	40877	1765827443	0.0001	0
E. j. sinensis_SA	SINE	U-L1	0	1765827443	0	0
P. clarkii	DNA	ACADEM-1	0	2735361232	0	0
P. clarkii	DNA	CMC-CHAPAEV	0	2735361232	0	0
P. clarkii	DNA	CMC-CHAPAEV-3	702910	2735361232	0.0007	0.0003
P. clarkii	DNA	CMC-ENSPM	3769243	2735361232	0.0036	0.0014
P. clarkii	DNA	CMC-MIRAGE	0	2735361232	0	0
P. clarkii	DNA	CMC-TRANSIB	0	2735361232	0	0
P. clarkii	DNA	CRYPTON	0	2735361232	0	0
P. clarkii	DNA	CRYPTON-H	0	2735361232	0	0
P. clarkii	DNA	CRYPTON-S	0	2735361232	0	0
P. clarkii	DNA	CRYPTON-V	0	2735361232	0	0
P. clarkii	DNA	CRYPTON-X	0	2735361232	0	0
P. clarkii	DNA	DADA	0	2735361232	0	0
P. clarkii	DNA	GINGER-1	0	2735361232	0	0
P. clarkii	DNA	GINGER-2	0	2735361232	0	0
P. clarkii	DNA	HAT	53816	2735361232	0.0001	0
P. clarkii	DNA	HAT-AC	9973824	2735361232	0.0096	0.0036
P. clarkii	DNA	HAT-BLACKJACK	794065	2735361232	0.0008	0.0003
P. clarkii	DNA	HAT-CHARLIE	1753870	2735361232	0.0017	0.0006
P. clarkii	DNA	HAT-HAT19	0	2735361232	0	0
P. clarkii	DNA	HAT-HAT5	0	2735361232	0	0
P. clarkii	DNA	HAT-HAT6	0	2735361232	0	0
P. clarkii	DNA	HAT-HATM	0	2735361232	0	0
P. clarkii	DNA	HAT-HATW	15684555	2735361232	0.0151	0.0057
P. clarkii	DNA	HAT-HATX	0	2735361232	0	0
P. clarkii	DNA	HAT-PEGASUS	0	2735361232	0	0
P. clarkii	DNA	HAT-TAG1	0	2735361232	0	0
P. clarkii	DNA	HAT-TIP100	596362	2735361232	0.0006	0.0002
P. clarkii	DNA	HELITRON	23852056	2735361232	0.0229	0.0087
P. clarkii	DNA	HELITRON-2	0	2735361232	0	0
P. clarkii	DNA	IS3EU	0	2735361232	0	0
P. clarkii	DNA	KOLOBOK-E	0	2735361232	0	0
P. clarkii	DNA	KOLOBOK-HYDRA	156278	2735361232	0.0002	0.0001
P. clarkii	DNA	KOLOBOK-T2	0	2735361232	0	0
P. clarkii	DNA	MAVERICK	9267366	2735361232	0.0089	0.0034
P. clarkii	DNA	MAVERICK-MAVIRUS	0	2735361232	0	0
P. clarkii	DNA	MERLIN	0	2735361232	0	0
P. clarkii	DNA	MULE	0	2735361232	0	0
P. clarkii	DNA	MULE-MUDR	514251	2735361232	0.0005	0.0002
P. clarkii	DNA	MULE-NOF	0	2735361232	0	0
P. clarkii	DNA	NOVOSIB	0	2735361232	0	0
P. clarkii	DNA	P	0	2735361232	0	0
P. clarkii	DNA	PIF-HARBINGER	904049	2735361232	0.0009	0.0003
P. clarkii	DNA	PIF-HARBS	0	2735361232	0	0
P. clarkii	DNA	PIF-ISL2EU	0	2735361232	0	0
P. clarkii	DNA	PIF-SPY	0	2735361232	0	0
P. clarkii	DNA	PIGGYBAC	5673511	2735361232	0.0055	0.0021
P. clarkii	DNA	PIGGYBAC-X	0	2735361232	0	0
P. clarkii	DNA	SOLA-1	0	2735361232	0	0
P. clarkii	DNA	SOLA-2	358031	2735361232	0.0003	0.0001
P. clarkii	DNA	SOLA-3	0	2735361232	0	0
P. clarkii	DNA	TCMAR	0	2735361232	0	0
P. clarkii	DNA	TCMAR-FOT1	0	2735361232	0	0
P. clarkii	DNA	TCMAR-ISRM11	0	2735361232	0	0
P. clarkii	DNA	TCMAR-M44	0	2735361232	0	0
P. clarkii	DNA	TCMAR-MARINER	0	2735361232	0	0
P. clarkii	DNA	TCMAR-POGO	0	2735361232	0	0
P. clarkii	DNA	TCMAR-STOWAWAY	0	2735361232	0	0
P. clarkii	DNA	TCMAR-TC1	0	2735361232	0	0
P. clarkii	DNA	TCMAR-TC2	843982	2735361232	0.0008	0.0003
P. clarkii	DNA	TCMAR-TC4	0	2735361232	0	0
P. clarkii	DNA	TCMAR-TIGGER	22499179	2735361232	0.0216	0.0082
P. clarkii	DNA	ZATOR	0	2735361232	0	0
P. clarkii	DNA	ZISUPTON	448005	2735361232	0.0004	0.0002
P. clarkii	LINE	CR1	331416997	2735361232	0.3186	0.1212
P. clarkii	LINE	CR1-ZENON	2743504	2735361232	0.0026	0.001
P. clarkii	LINE	CRE	26064232	2735361232	0.0251	0.0095
P. clarkii	LINE	DONG-R4	0	2735361232	0	0
P. clarkii	LINE	I	141003816	2735361232	0.1355	0.0515
P. clarkii	LINE	I-JOCKEY	8702253	2735361232	0.0084	0.0032
P. clarkii	LINE	L1	531660	2735361232	0.0005	0.0002
P. clarkii	LINE	L1-TX1	11155040	2735361232	0.0107	0.0041
P. clarkii	LINE	L2	58711224	2735361232	0.0564	0.0215
P. clarkii	LINE	PENELOPE	93750154	2735361232	0.0901	0.0343
P. clarkii	LINE	PROTO2	1228935	2735361232	0.0012	0.0004
P. clarkii	LINE	R1	0	2735361232	0	0
P. clarkii	LINE	R1-LOA	0	2735361232	0	0
P. clarkii	LINE	R2	832213	2735361232	0.0008	0.0003
P. clarkii	LINE	R2-NESL	0	2735361232	0	0
P. clarkii	LINE	REX-BABAR	0	2735361232	0	0
P. clarkii	LINE	RTE	0	2735361232	0	0
P. clarkii	LINE	RTE-BOVB	6780865	2735361232	0.0065	0.0025
P. clarkii	LINE	RTE-ORTE	0	2735361232	0	0
P. clarkii	LINE	RTE-RTE	0	2735361232	0	0
P. clarkii	LINE	RTE-X	63477	2735361232	0.0001	0
P. clarkii	LINE	TAD1	0	2735361232	0	0
P. clarkii	LTR	CAULIMOVIRUS	611842	2735361232	0.0006	0.0002
P. clarkii	LTR	COPIA	1998508	2735361232	0.0019	0.0007
P. clarkii	LTR	DIRS	46034052	2735361232	0.0443	0.0168
P. clarkii	LTR	ERV1	1070299	2735361232	0.001	0.0004
P. clarkii	LTR	ERV4	0	2735361232	0	0
P. clarkii	LTR	ERVK	1324737	2735361232	0.0013	0.0005
P. clarkii	LTR	ERVL	0	2735361232	0	0
P. clarkii	LTR	ERVL-MALR	0	2735361232	0	0
P. clarkii	LTR	GYPSY	123147832	2735361232	0.1184	0.045
P. clarkii	LTR	NGARO	544867	2735361232	0.0005	0.0002
P. clarkii	LTR	PAO	28607234	2735361232	0.0275	0.0105
P. clarkii	SINE	5S	2248833	2735361232	0.0022	0.0008
P. clarkii	SINE	ALU	0	2735361232	0	0
P. clarkii	SINE	B2	0	2735361232	0	0
P. clarkii	SINE	B4	0	2735361232	0	0
P. clarkii	SINE	ID	0	2735361232	0	0
P. clarkii	SINE	MIR	0	2735361232	0	0
P. clarkii	SINE	TRNA	217843	2735361232	0.0002	0.0001
P. clarkii	SINE	TRNA-CORE	24035431	2735361232	0.0231	0.0088
P. clarkii	SINE	TRNA-CORE-RTE	0	2735361232	0	0
P. clarkii	SINE	TRNA-DEU	0	2735361232	0	0
P. clarkii	SINE	TRNA-DEU-L2	764309	2735361232	0.0007	0.0003
P. clarkii	SINE	TRNA-DEU-RTE	0	2735361232	0	0
P. clarkii	SINE	TRNA-I	0	2735361232	0	0
P. clarkii	SINE	TRNA-L2	28111245	2735361232	0.027	0.0103
P. clarkii	SINE	TRNA-META	0	2735361232	0	0
P. clarkii	SINE	TRNA-RTE	0	2735361232	0	0
P. clarkii	SINE	TRNA-V	0	2735361232	0	0
P. clarkii	SINE	U	0	2735361232	0	0
P. clarkii	SINE	U-L1	703399	2735361232	0.0007	0.0003
C. opilio	DNA	ACADEM-1	39063066	2002919378	0.0755	0.0195
C. opilio	DNA	CMC-CHAPAEV	0	2002919378	0	0
C. opilio	DNA	CMC-CHAPAEV-3	12377237	2002919378	0.0239	0.0062
C. opilio	DNA	CMC-ENSPM	2164262	2002919378	0.0042	0.0011
C. opilio	DNA	CMC-MIRAGE	0	2002919378	0	0
C. opilio	DNA	CMC-TRANSIB	0	2002919378	0	0
C. opilio	DNA	CRYPTON	0	2002919378	0	0
C. opilio	DNA	CRYPTON-H	0	2002919378	0	0
C. opilio	DNA	CRYPTON-S	51602	2002919378	0.0001	0
C. opilio	DNA	CRYPTON-V	0	2002919378	0	0
C. opilio	DNA	CRYPTON-X	24043	2002919378	0	0
C. opilio	DNA	DADA	0	2002919378	0	0
C. opilio	DNA	GINGER-1	74414	2002919378	0.0001	0
C. opilio	DNA	GINGER-2	1330924	2002919378	0.0026	0.0007
C. opilio	DNA	HAT	2090057	2002919378	0.004	0.001
C. opilio	DNA	HAT-AC	6231530	2002919378	0.012	0.0031
C. opilio	DNA	HAT-BLACKJACK	1646610	2002919378	0.0032	0.0008
C. opilio	DNA	HAT-CHARLIE	12997125	2002919378	0.0251	0.0065
C. opilio	DNA	HAT-HAT19	484912	2002919378	0.0009	0.0002
C. opilio	DNA	HAT-HAT5	0	2002919378	0	0
C. opilio	DNA	HAT-HAT6	0	2002919378	0	0
C. opilio	DNA	HAT-HATM	26149909	2002919378	0.0506	0.0131
C. opilio	DNA	HAT-HATW	0	2002919378	0	0
C. opilio	DNA	HAT-HATX	581424	2002919378	0.0011	0.0003
C. opilio	DNA	HAT-PEGASUS	132499	2002919378	0.0003	0.0001
C. opilio	DNA	HAT-TAG1	470161	2002919378	0.0009	0.0002
C. opilio	DNA	HAT-TIP100	9645034	2002919378	0.0186	0.0048
C. opilio	DNA	HELITRON	6111216	2002919378	0.0118	0.0031
C. opilio	DNA	HELITRON-2	0	2002919378	0	0
C. opilio	DNA	IS3EU	0	2002919378	0	0
C. opilio	DNA	KOLOBOK-E	0	2002919378	0	0
C. opilio	DNA	KOLOBOK-HYDRA	234492	2002919378	0.0005	0.0001
C. opilio	DNA	KOLOBOK-T2	788519	2002919378	0.0015	0.0004
C. opilio	DNA	MAVERICK	0	2002919378	0	0
C. opilio	DNA	MAVERICK-MAVIRUS	0	2002919378	0	0
C. opilio	DNA	MERLIN	1007717	2002919378	0.0019	0.0005
C. opilio	DNA	MULE	0	2002919378	0	0
C. opilio	DNA	MULE-MUDR	1633561	2002919378	0.0032	0.0008
C. opilio	DNA	MULE-NOF	0	2002919378	0	0
C. opilio	DNA	NOVOSIB	0	2002919378	0	0
C. opilio	DNA	P	2708764	2002919378	0.0052	0.0014
C. opilio	DNA	PIF-HARBINGER	3853327	2002919378	0.0075	0.0019
C. opilio	DNA	PIF-HARBS	0	2002919378	0	0
C. opilio	DNA	PIF-ISL2EU	222064	2002919378	0.0004	0.0001
C. opilio	DNA	PIF-SPY	0	2002919378	0	0
C. opilio	DNA	PIGGYBAC	681952	2002919378	0.0013	0.0003
C. opilio	DNA	PIGGYBAC-X	0	2002919378	0	0
C. opilio	DNA	SOLA-1	321582	2002919378	0.0006	0.0002
C. opilio	DNA	SOLA-2	328268	2002919378	0.0006	0.0002
C. opilio	DNA	SOLA-3	486015	2002919378	0.0009	0.0002
C. opilio	DNA	TCMAR	362396	2002919378	0.0007	0.0002
C. opilio	DNA	TCMAR-FOT1	2002226	2002919378	0.0039	0.001
C. opilio	DNA	TCMAR-ISRM11	35694	2002919378	0.0001	0
C. opilio	DNA	TCMAR-M44	0	2002919378	0	0
C. opilio	DNA	TCMAR-MARINER	1132165	2002919378	0.0022	0.0006
C. opilio	DNA	TCMAR-POGO	1569707	2002919378	0.003	0.0008
C. opilio	DNA	TCMAR-STOWAWAY	0	2002919378	0	0
C. opilio	DNA	TCMAR-TC1	4574064	2002919378	0.0088	0.0023
C. opilio	DNA	TCMAR-TC2	10440372	2002919378	0.0202	0.0052
C. opilio	DNA	TCMAR-TC4	0	2002919378	0	0
C. opilio	DNA	TCMAR-TIGGER	11050938	2002919378	0.0214	0.0055
C. opilio	DNA	ZATOR	113120	2002919378	0.0002	0.0001
C. opilio	DNA	ZISUPTON	0	2002919378	0	0
C. opilio	LINE	CR1	81454763	2002919378	0.1575	0.0407
C. opilio	LINE	CR1-ZENON	41093139	2002919378	0.0795	0.0205
C. opilio	LINE	CRE	8160689	2002919378	0.0158	0.0041
C. opilio	LINE	DONG-R4	0	2002919378	0	0
C. opilio	LINE	I	26129708	2002919378	0.0505	0.013
C. opilio	LINE	I-JOCKEY	2289371	2002919378	0.0044	0.0011
C. opilio	LINE	L1	197795	2002919378	0.0004	0.0001
C. opilio	LINE	L1-TX1	0	2002919378	0	0
C. opilio	LINE	L2	26676958	2002919378	0.0516	0.0133
C. opilio	LINE	PENELOPE	6892762	2002919378	0.0133	0.0034
C. opilio	LINE	PROTO2	6016935	2002919378	0.0116	0.003
C. opilio	LINE	R1	5609244	2002919378	0.0108	0.0028
C. opilio	LINE	R1-LOA	0	2002919378	0	0
C. opilio	LINE	R2	1555319	2002919378	0.003	0.0008
C. opilio	LINE	R2-NESL	0	2002919378	0	0
C. opilio	LINE	REX-BABAR	188620	2002919378	0.0004	0.0001
C. opilio	LINE	RTE	856241	2002919378	0.0017	0.0004
C. opilio	LINE	RTE-BOVB	50951659	2002919378	0.0985	0.0254
C. opilio	LINE	RTE-ORTE	0	2002919378	0	0
C. opilio	LINE	RTE-RTE	534808	2002919378	0.001	0.0003
C. opilio	LINE	RTE-X	15930000	2002919378	0.0308	0.008
C. opilio	LINE	TAD1	2689965	2002919378	0.0052	0.0013
C. opilio	LTR	CAULIMOVIRUS	0	2002919378	0	0
C. opilio	LTR	COPIA	2888651	2002919378	0.0056	0.0014
C. opilio	LTR	DIRS	2965001	2002919378	0.0057	0.0015
C. opilio	LTR	ERV1	627889	2002919378	0.0012	0.0003
C. opilio	LTR	ERV4	0	2002919378	0	0
C. opilio	LTR	ERVK	530693	2002919378	0.001	0.0003
C. opilio	LTR	ERVL	0	2002919378	0	0
C. opilio	LTR	ERVL-MALR	0	2002919378	0	0
C. opilio	LTR	GYPSY	39944021	2002919378	0.0772	0.0199
C. opilio	LTR	NGARO	695332	2002919378	0.0013	0.0003
C. opilio	LTR	PAO	8999514	2002919378	0.0174	0.0045
C. opilio	SINE	5S	105273	2002919378	0.0002	0.0001
C. opilio	SINE	ALU	0	2002919378	0	0
C. opilio	SINE	B2	0	2002919378	0	0
C. opilio	SINE	B4	0	2002919378	0	0
C. opilio	SINE	ID	0	2002919378	0	0
C. opilio	SINE	MIR	0	2002919378	0	0
C. opilio	SINE	TRNA	7473934	2002919378	0.0145	0.0037
C. opilio	SINE	TRNA-CORE	10355650	2002919378	0.02	0.0052
C. opilio	SINE	TRNA-CORE-RTE	0	2002919378	0	0
C. opilio	SINE	TRNA-DEU	0	2002919378	0	0
C. opilio	SINE	TRNA-DEU-L2	0	2002919378	0	0
C. opilio	SINE	TRNA-DEU-RTE	0	2002919378	0	0
C. opilio	SINE	TRNA-I	0	2002919378	0	0
C. opilio	SINE	TRNA-L2	191930	2002919378	0.0004	0.0001
C. opilio	SINE	TRNA-META	0	2002919378	0	0
C. opilio	SINE	TRNA-RTE	0	2002919378	0	0
C. opilio	SINE	TRNA-V	0	2002919378	0	0
C. opilio	SINE	U	0	2002919378	0	0
C. opilio	SINE	U-L1	0	2002919378	0	0
P. chinensis	DNA	ACADEM-1	0	1581132620	0	0
P. chinensis	DNA	CMC-CHAPAEV	0	1581132620	0	0
P. chinensis	DNA	CMC-CHAPAEV-3	0	1581132620	0	0
P. chinensis	DNA	CMC-ENSPM	1168199	1581132620	0.0044	0.0007
P. chinensis	DNA	CMC-MIRAGE	0	1581132620	0	0
P. chinensis	DNA	CMC-TRANSIB	54807	1581132620	0.0002	0
P. chinensis	DNA	CRYPTON	0	1581132620	0	0
P. chinensis	DNA	CRYPTON-H	0	1581132620	0	0
P. chinensis	DNA	CRYPTON-S	0	1581132620	0	0
P. chinensis	DNA	CRYPTON-V	0	1581132620	0	0
P. chinensis	DNA	CRYPTON-X	0	1581132620	0	0
P. chinensis	DNA	DADA	0	1581132620	0	0
P. chinensis	DNA	GINGER-1	3381047	1581132620	0.0126	0.0021
P. chinensis	DNA	GINGER-2	168404	1581132620	0.0006	0.0001
P. chinensis	DNA	HAT	55969	1581132620	0.0002	0
P. chinensis	DNA	HAT-AC	463854	1581132620	0.0017	0.0003
P. chinensis	DNA	HAT-BLACKJACK	0	1581132620	0	0
P. chinensis	DNA	HAT-CHARLIE	517781	1581132620	0.0019	0.0003
P. chinensis	DNA	HAT-HAT19	0	1581132620	0	0
P. chinensis	DNA	HAT-HAT5	0	1581132620	0	0
P. chinensis	DNA	HAT-HAT6	0	1581132620	0	0
P. chinensis	DNA	HAT-HATM	50399	1581132620	0.0002	0
P. chinensis	DNA	HAT-HATW	0	1581132620	0	0
P. chinensis	DNA	HAT-HATX	0	1581132620	0	0
P. chinensis	DNA	HAT-PEGASUS	0	1581132620	0	0
P. chinensis	DNA	HAT-TAG1	205609	1581132620	0.0008	0.0001
P. chinensis	DNA	HAT-TIP100	186846	1581132620	0.0007	0.0001
P. chinensis	DNA	HELITRON	228605	1581132620	0.0009	0.0001
P. chinensis	DNA	HELITRON-2	0	1581132620	0	0
P. chinensis	DNA	IS3EU	0	1581132620	0	0
P. chinensis	DNA	KOLOBOK-E	0	1581132620	0	0
P. chinensis	DNA	KOLOBOK-HYDRA	0	1581132620	0	0
P. chinensis	DNA	KOLOBOK-T2	668064	1581132620	0.0025	0.0004
P. chinensis	DNA	MAVERICK	787638	1581132620	0.0029	0.0005
P. chinensis	DNA	MAVERICK-MAVIRUS	0	1581132620	0	0
P. chinensis	DNA	MERLIN	17612643	1581132620	0.0657	0.0111
P. chinensis	DNA	MULE	0	1581132620	0	0
P. chinensis	DNA	MULE-MUDR	256540	1581132620	0.001	0.0002
P. chinensis	DNA	MULE-NOF	0	1581132620	0	0
P. chinensis	DNA	NOVOSIB	0	1581132620	0	0
P. chinensis	DNA	P	187849	1581132620	0.0007	0.0001
P. chinensis	DNA	PIF-HARBINGER	896276	1581132620	0.0033	0.0006
P. chinensis	DNA	PIF-HARBS	0	1581132620	0	0
P. chinensis	DNA	PIF-ISL2EU	0	1581132620	0	0
P. chinensis	DNA	PIF-SPY	0	1581132620	0	0
P. chinensis	DNA	PIGGYBAC	119530	1581132620	0.0004	0.0001
P. chinensis	DNA	PIGGYBAC-X	101893	1581132620	0.0004	0.0001
P. chinensis	DNA	SOLA-1	0	1581132620	0	0
P. chinensis	DNA	SOLA-2	0	1581132620	0	0
P. chinensis	DNA	SOLA-3	0	1581132620	0	0
P. chinensis	DNA	TCMAR	0	1581132620	0	0
P. chinensis	DNA	TCMAR-FOT1	0	1581132620	0	0
P. chinensis	DNA	TCMAR-ISRM11	0	1581132620	0	0
P. chinensis	DNA	TCMAR-M44	0	1581132620	0	0
P. chinensis	DNA	TCMAR-MARINER	2288263	1581132620	0.0085	0.0014
P. chinensis	DNA	TCMAR-POGO	0	1581132620	0	0
P. chinensis	DNA	TCMAR-STOWAWAY	0	1581132620	0	0
P. chinensis	DNA	TCMAR-TC1	3097032	1581132620	0.0115	0.002
P. chinensis	DNA	TCMAR-TC2	89719	1581132620	0.0003	0.0001
P. chinensis	DNA	TCMAR-TC4	0	1581132620	0	0
P. chinensis	DNA	TCMAR-TIGGER	37990	1581132620	0.0001	0
P. chinensis	DNA	ZATOR	0	1581132620	0	0
P. chinensis	DNA	ZISUPTON	0	1581132620	0	0
P. chinensis	LINE	CR1	4307791	1581132620	0.0161	0.0027
P. chinensis	LINE	CR1-ZENON	975267	1581132620	0.0036	0.0006
P. chinensis	LINE	CRE	176365	1581132620	0.0007	0.0001
P. chinensis	LINE	DONG-R4	1025294	1581132620	0.0038	0.0006
P. chinensis	LINE	I	45694674	1581132620	0.1703	0.0289
P. chinensis	LINE	I-JOCKEY	1519899	1581132620	0.0057	0.001
P. chinensis	LINE	L1	152344	1581132620	0.0006	0.0001
P. chinensis	LINE	L1-TX1	3097365	1581132620	0.0115	0.002
P. chinensis	LINE	L2	3776171	1581132620	0.0141	0.0024
P. chinensis	LINE	PENELOPE	91720574	1581132620	0.3419	0.058
P. chinensis	LINE	PROTO2	0	1581132620	0	0
P. chinensis	LINE	R1	220289	1581132620	0.0008	0.0001
P. chinensis	LINE	R1-LOA	0	1581132620	0	0
P. chinensis	LINE	R2	0	1581132620	0	0
P. chinensis	LINE	R2-NESL	0	1581132620	0	0
P. chinensis	LINE	REX-BABAR	493047	1581132620	0.0018	0.0003
P. chinensis	LINE	RTE	2770307	1581132620	0.0103	0.0018
P. chinensis	LINE	RTE-BOVB	21378748	1581132620	0.0797	0.0135
P. chinensis	LINE	RTE-ORTE	0	1581132620	0	0
P. chinensis	LINE	RTE-RTE	7623652	1581132620	0.0284	0.0048
P. chinensis	LINE	RTE-X	0	1581132620	0	0
P. chinensis	LINE	TAD1	0	1581132620	0	0
P. chinensis	LTR	CAULIMOVIRUS	40438	1581132620	0.0002	0
P. chinensis	LTR	COPIA	122891	1581132620	0.0005	0.0001
P. chinensis	LTR	DIRS	0	1581132620	0	0
P. chinensis	LTR	ERV1	210162	1581132620	0.0008	0.0001
P. chinensis	LTR	ERV4	0	1581132620	0	0
P. chinensis	LTR	ERVK	0	1581132620	0	0
P. chinensis	LTR	ERVL	0	1581132620	0	0
P. chinensis	LTR	ERVL-MALR	0	1581132620	0	0
P. chinensis	LTR	GYPSY	16038125	1581132620	0.0598	0.0101
P. chinensis	LTR	NGARO	0	1581132620	0	0
P. chinensis	LTR	PAO	261785	1581132620	0.001	0.0002
P. chinensis	SINE	5S	0	1581132620	0	0
P. chinensis	SINE	ALU	0	1581132620	0	0
P. chinensis	SINE	B2	21176987	1581132620	0.0789	0.0134
P. chinensis	SINE	B4	288558	1581132620	0.0011	0.0002
P. chinensis	SINE	ID	61219	1581132620	0.0002	0
P. chinensis	SINE	MIR	238544	1581132620	0.0009	0.0002
P. chinensis	SINE	TRNA	12212330	1581132620	0.0455	0.0077
P. chinensis	SINE	TRNA-CORE	0	1581132620	0	0
P. chinensis	SINE	TRNA-CORE-RTE	0	1581132620	0	0
P. chinensis	SINE	TRNA-DEU	0	1581132620	0	0
P. chinensis	SINE	TRNA-DEU-L2	0	1581132620	0	0
P. chinensis	SINE	TRNA-DEU-RTE	0	1581132620	0	0
P. chinensis	SINE	TRNA-I	0	1581132620	0	0
P. chinensis	SINE	TRNA-L2	0	1581132620	0	0
P. chinensis	SINE	TRNA-META	0	1581132620	0	0
P. chinensis	SINE	TRNA-RTE	0	1581132620	0	0
P. chinensis	SINE	TRNA-V	0	1581132620	0	0
P. chinensis	SINE	U	47176	1581132620	0.0002	0
P. chinensis	SINE	U-L1	0	1581132620	0	0
A. integerrimus	DNA	ACADEM-1	3877648	2613035345	0.0042	0.0015
A. integerrimus	DNA	CMC-CHAPAEV	420484	2613035345	0.0005	0.0002
A. integerrimus	DNA	CMC-CHAPAEV-3	1628471	2613035345	0.0018	0.0006
A. integerrimus	DNA	CMC-ENSPM	61080871	2613035345	0.0662	0.0234
A. integerrimus	DNA	CMC-MIRAGE	0	2613035345	0	0
A. integerrimus	DNA	CMC-TRANSIB	0	2613035345	0	0
A. integerrimus	DNA	CRYPTON	0	2613035345	0	0
A. integerrimus	DNA	CRYPTON-H	52469	2613035345	0.0001	0
A. integerrimus	DNA	CRYPTON-S	0	2613035345	0	0
A. integerrimus	DNA	CRYPTON-V	301351	2613035345	0.0003	0.0001
A. integerrimus	DNA	CRYPTON-X	0	2613035345	0	0
A. integerrimus	DNA	DADA	498549	2613035345	0.0005	0.0002
A. integerrimus	DNA	GINGER-1	83905	2613035345	0.0001	0
A. integerrimus	DNA	GINGER-2	3717855	2613035345	0.004	0.0014
A. integerrimus	DNA	HAT	691269	2613035345	0.0007	0.0003
A. integerrimus	DNA	HAT-AC	8646594	2613035345	0.0094	0.0033
A. integerrimus	DNA	HAT-BLACKJACK	984120	2613035345	0.0011	0.0004
A. integerrimus	DNA	HAT-CHARLIE	8687807	2613035345	0.0094	0.0033
A. integerrimus	DNA	HAT-HAT19	3520619	2613035345	0.0038	0.0013
A. integerrimus	DNA	HAT-HAT5	226946	2613035345	0.0002	0.0001
A. integerrimus	DNA	HAT-HAT6	0	2613035345	0	0
A. integerrimus	DNA	HAT-HATM	4349985	2613035345	0.0047	0.0017
A. integerrimus	DNA	HAT-HATW	0	2613035345	0	0
A. integerrimus	DNA	HAT-HATX	770813	2613035345	0.0008	0.0003
A. integerrimus	DNA	HAT-PEGASUS	0	2613035345	0	0
A. integerrimus	DNA	HAT-TAG1	764975	2613035345	0.0008	0.0003
A. integerrimus	DNA	HAT-TIP100	9462237	2613035345	0.0103	0.0036
A. integerrimus	DNA	HELITRON	13912094	2613035345	0.0151	0.0053
A. integerrimus	DNA	HELITRON-2	67536	2613035345	0.0001	0
A. integerrimus	DNA	IS3EU	0	2613035345	0	0
A. integerrimus	DNA	KOLOBOK-E	0	2613035345	0	0
A. integerrimus	DNA	KOLOBOK-HYDRA	413453	2613035345	0.0004	0.0002
A. integerrimus	DNA	KOLOBOK-T2	453782	2613035345	0.0005	0.0002
A. integerrimus	DNA	MAVERICK	3932344	2613035345	0.0043	0.0015
A. integerrimus	DNA	MAVERICK-MAVIRUS	153371	2613035345	0.0002	0.0001
A. integerrimus	DNA	MERLIN	924900	2613035345	0.001	0.0004
A. integerrimus	DNA	MULE	0	2613035345	0	0
A. integerrimus	DNA	MULE-MUDR	3616861	2613035345	0.0039	0.0014
A. integerrimus	DNA	MULE-NOF	0	2613035345	0	0
A. integerrimus	DNA	NOVOSIB	19723421	2613035345	0.0214	0.0075
A. integerrimus	DNA	P	2081928	2613035345	0.0023	0.0008
A. integerrimus	DNA	PIF-HARBINGER	8719831	2613035345	0.0095	0.0033
A. integerrimus	DNA	PIF-HARBS	0	2613035345	0	0
A. integerrimus	DNA	PIF-ISL2EU	2826510	2613035345	0.0031	0.0011
A. integerrimus	DNA	PIF-SPY	0	2613035345	0	0
A. integerrimus	DNA	PIGGYBAC	931035	2613035345	0.001	0.0004
A. integerrimus	DNA	PIGGYBAC-X	0	2613035345	0	0
A. integerrimus	DNA	SOLA-1	1013290	2613035345	0.0011	0.0004
A. integerrimus	DNA	SOLA-2	2142052	2613035345	0.0023	0.0008
A. integerrimus	DNA	SOLA-3	0	2613035345	0	0
A. integerrimus	DNA	TCMAR	180599	2613035345	0.0002	0.0001
A. integerrimus	DNA	TCMAR-FOT1	3097758	2613035345	0.0034	0.0012
A. integerrimus	DNA	TCMAR-ISRM11	0	2613035345	0	0
A. integerrimus	DNA	TCMAR-M44	999911	2613035345	0.0011	0.0004
A. integerrimus	DNA	TCMAR-MARINER	4372313	2613035345	0.0047	0.0017
A. integerrimus	DNA	TCMAR-POGO	0	2613035345	0	0
A. integerrimus	DNA	TCMAR-STOWAWAY	0	2613035345	0	0
A. integerrimus	DNA	TCMAR-TC1	9913289	2613035345	0.0107	0.0038
A. integerrimus	DNA	TCMAR-TC2	2427458	2613035345	0.0026	0.0009
A. integerrimus	DNA	TCMAR-TC4	0	2613035345	0	0
A. integerrimus	DNA	TCMAR-TIGGER	37971559	2613035345	0.0412	0.0145
A. integerrimus	DNA	ZATOR	0	2613035345	0	0
A. integerrimus	DNA	ZISUPTON	4113119	2613035345	0.0045	0.0016
A. integerrimus	LINE	CR1	263321177	2613035345	0.2855	0.1008
A. integerrimus	LINE	CR1-ZENON	116227235	2613035345	0.126	0.0445
A. integerrimus	LINE	CRE	9796157	2613035345	0.0106	0.0037
A. integerrimus	LINE	DONG-R4	0	2613035345	0	0
A. integerrimus	LINE	I	49565742	2613035345	0.0537	0.019
A. integerrimus	LINE	I-JOCKEY	9598032	2613035345	0.0104	0.0037
A. integerrimus	LINE	L1	918990	2613035345	0.001	0.0004
A. integerrimus	LINE	L1-TX1	0	2613035345	0	0
A. integerrimus	LINE	L2	12579611	2613035345	0.0136	0.0048
A. integerrimus	LINE	PENELOPE	12461195	2613035345	0.0135	0.0048
A. integerrimus	LINE	PROTO2	146121	2613035345	0.0002	0.0001
A. integerrimus	LINE	R1	706442	2613035345	0.0008	0.0003
A. integerrimus	LINE	R1-LOA	0	2613035345	0	0
A. integerrimus	LINE	R2	2553745	2613035345	0.0028	0.001
A. integerrimus	LINE	R2-NESL	50490	2613035345	0.0001	0
A. integerrimus	LINE	REX-BABAR	2250551	2613035345	0.0024	0.0009
A. integerrimus	LINE	RTE	0	2613035345	0	0
A. integerrimus	LINE	RTE-BOVB	64773331	2613035345	0.0702	0.0248
A. integerrimus	LINE	RTE-ORTE	0	2613035345	0	0
A. integerrimus	LINE	RTE-RTE	1564994	2613035345	0.0017	0.0006
A. integerrimus	LINE	RTE-X	6424967	2613035345	0.007	0.0025
A. integerrimus	LINE	TAD1	826635	2613035345	0.0009	0.0003
A. integerrimus	LTR	CAULIMOVIRUS	0	2613035345	0	0
A. integerrimus	LTR	COPIA	1874344	2613035345	0.002	0.0007
A. integerrimus	LTR	DIRS	10026061	2613035345	0.0109	0.0038
A. integerrimus	LTR	ERV1	235353	2613035345	0.0003	0.0001
A. integerrimus	LTR	ERV4	1984892	2613035345	0.0022	0.0008
A. integerrimus	LTR	ERVK	8037439	2613035345	0.0087	0.0031
A. integerrimus	LTR	ERVL	0	2613035345	0	0
A. integerrimus	LTR	ERVL-MALR	0	2613035345	0	0
A. integerrimus	LTR	GYPSY	53029851	2613035345	0.0575	0.0203
A. integerrimus	LTR	NGARO	63642	2613035345	0.0001	0
A. integerrimus	LTR	PAO	14906252	2613035345	0.0162	0.0057
A. integerrimus	SINE	5S	1227021	2613035345	0.0013	0.0005
A. integerrimus	SINE	ALU	0	2613035345	0	0
A. integerrimus	SINE	B2	0	2613035345	0	0
A. integerrimus	SINE	B4	258794	2613035345	0.0003	0.0001
A. integerrimus	SINE	ID	0	2613035345	0	0
A. integerrimus	SINE	MIR	131654	2613035345	0.0001	0.0001
A. integerrimus	SINE	TRNA	38335179	2613035345	0.0416	0.0147
A. integerrimus	SINE	TRNA-CORE	3844809	2613035345	0.0042	0.0015
A. integerrimus	SINE	TRNA-CORE-RTE	0	2613035345	0	0
A. integerrimus	SINE	TRNA-DEU	468466	2613035345	0.0005	0.0002
A. integerrimus	SINE	TRNA-DEU-L2	27197	2613035345	0	0
A. integerrimus	SINE	TRNA-DEU-RTE	0	2613035345	0	0
A. integerrimus	SINE	TRNA-I	0	2613035345	0	0
A. integerrimus	SINE	TRNA-L2	0	2613035345	0	0
A. integerrimus	SINE	TRNA-META	0	2613035345	0	0
A. integerrimus	SINE	TRNA-RTE	0	2613035345	0	0
A. integerrimus	SINE	TRNA-V	332664	2613035345	0.0004	0.0001
A. integerrimus	SINE	U	0	2613035345	0	0
A. integerrimus	SINE	U-L1	0	2613035345	0	0
P. platypus	DNA	ACADEM-1	45677640	5043581053	0.022	0.0091
P. platypus	DNA	CMC-CHAPAEV	0	5043581053	0	0
P. platypus	DNA	CMC-CHAPAEV-3	262846	5043581053	0.0001	0.0001
P. platypus	DNA	CMC-ENSPM	43523486	5043581053	0.021	0.0086
P. platypus	DNA	CMC-MIRAGE	0	5043581053	0	0
P. platypus	DNA	CMC-TRANSIB	158123	5043581053	0.0001	0
P. platypus	DNA	CRYPTON	1314247	5043581053	0.0006	0.0003
P. platypus	DNA	CRYPTON-H	586753	5043581053	0.0003	0.0001
P. platypus	DNA	CRYPTON-S	0	5043581053	0	0
P. platypus	DNA	CRYPTON-V	11387691	5043581053	0.0055	0.0023
P. platypus	DNA	CRYPTON-X	0	5043581053	0	0
P. platypus	DNA	DADA	777296	5043581053	0.0004	0.0002
P. platypus	DNA	GINGER-1	682743	5043581053	0.0003	0.0001
P. platypus	DNA	GINGER-2	114128	5043581053	0.0001	0
P. platypus	DNA	HAT	1830852	5043581053	0.0009	0.0004
P. platypus	DNA	HAT-AC	15620054	5043581053	0.0075	0.0031
P. platypus	DNA	HAT-BLACKJACK	2693950	5043581053	0.0013	0.0005
P. platypus	DNA	HAT-CHARLIE	2801655	5043581053	0.0013	0.0006
P. platypus	DNA	HAT-HAT19	0	5043581053	0	0
P. platypus	DNA	HAT-HAT5	0	5043581053	0	0
P. platypus	DNA	HAT-HAT6	0	5043581053	0	0
P. platypus	DNA	HAT-HATM	644555	5043581053	0.0003	0.0001
P. platypus	DNA	HAT-HATW	0	5043581053	0	0
P. platypus	DNA	HAT-HATX	0	5043581053	0	0
P. platypus	DNA	HAT-PEGASUS	0	5043581053	0	0
P. platypus	DNA	HAT-TAG1	0	5043581053	0	0
P. platypus	DNA	HAT-TIP100	3064101	5043581053	0.0015	0.0006
P. platypus	DNA	HELITRON	13098987	5043581053	0.0063	0.0026
P. platypus	DNA	HELITRON-2	0	5043581053	0	0
P. platypus	DNA	IS3EU	0	5043581053	0	0
P. platypus	DNA	KOLOBOK-E	0	5043581053	0	0
P. platypus	DNA	KOLOBOK-HYDRA	0	5043581053	0	0
P. platypus	DNA	KOLOBOK-T2	713114	5043581053	0.0003	0.0001
P. platypus	DNA	MAVERICK	1722157	5043581053	0.0008	0.0003
P. platypus	DNA	MAVERICK-MAVIRUS	0	5043581053	0	0
P. platypus	DNA	MERLIN	6704243	5043581053	0.0032	0.0013
P. platypus	DNA	MULE	0	5043581053	0	0
P. platypus	DNA	MULE-MUDR	3365965	5043581053	0.0016	0.0007
P. platypus	DNA	MULE-NOF	0	5043581053	0	0
P. platypus	DNA	NOVOSIB	0	5043581053	0	0
P. platypus	DNA	P	4858788	5043581053	0.0023	0.001
P. platypus	DNA	PIF-HARBINGER	27348463	5043581053	0.0132	0.0054
P. platypus	DNA	PIF-HARBS	0	5043581053	0	0
P. platypus	DNA	PIF-ISL2EU	0	5043581053	0	0
P. platypus	DNA	PIF-SPY	0	5043581053	0	0
P. platypus	DNA	PIGGYBAC	64938378	5043581053	0.0313	0.0129
P. platypus	DNA	PIGGYBAC-X	0	5043581053	0	0
P. platypus	DNA	SOLA-1	7053543	5043581053	0.0034	0.0014
P. platypus	DNA	SOLA-2	0	5043581053	0	0
P. platypus	DNA	SOLA-3	457319	5043581053	0.0002	0.0001
P. platypus	DNA	TCMAR	0	5043581053	0	0
P. platypus	DNA	TCMAR-FOT1	2446005	5043581053	0.0012	0.0005
P. platypus	DNA	TCMAR-ISRM11	0	5043581053	0	0
P. platypus	DNA	TCMAR-M44	1705765	5043581053	0.0008	0.0003
P. platypus	DNA	TCMAR-MARINER	632316	5043581053	0.0003	0.0001
P. platypus	DNA	TCMAR-POGO	0	5043581053	0	0
P. platypus	DNA	TCMAR-STOWAWAY	1183277	5043581053	0.0006	0.0002
P. platypus	DNA	TCMAR-TC1	3187134	5043581053	0.0015	0.0006
P. platypus	DNA	TCMAR-TC2	33360	5043581053	0	0
P. platypus	DNA	TCMAR-TC4	0	5043581053	0	0
P. platypus	DNA	TCMAR-TIGGER	10944340	5043581053	0.0053	0.0022
P. platypus	DNA	ZATOR	0	5043581053	0	0
P. platypus	DNA	ZISUPTON	1188751	5043581053	0.0006	0.0002
P. platypus	LINE	CR1	442711003	5043581053	0.2131	0.0878
P. platypus	LINE	CR1-ZENON	223071577	5043581053	0.1074	0.0442
P. platypus	LINE	CRE	18730094	5043581053	0.009	0.0037
P. platypus	LINE	DONG-R4	0	5043581053	0	0
P. platypus	LINE	I	33119414	5043581053	0.0159	0.0066
P. platypus	LINE	I-JOCKEY	79494145	5043581053	0.0383	0.0158
P. platypus	LINE	L1	3975710	5043581053	0.0019	0.0008
P. platypus	LINE	L1-TX1	546764	5043581053	0.0003	0.0001
P. platypus	LINE	L2	53889113	5043581053	0.0259	0.0107
P. platypus	LINE	PENELOPE	35015380	5043581053	0.0169	0.0069
P. platypus	LINE	PROTO2	16835723	5043581053	0.0081	0.0033
P. platypus	LINE	R1	0	5043581053	0	0
P. platypus	LINE	R1-LOA	0	5043581053	0	0
P. platypus	LINE	R2	0	5043581053	0	0
P. platypus	LINE	R2-NESL	0	5043581053	0	0
P. platypus	LINE	REX-BABAR	0	5043581053	0	0
P. platypus	LINE	RTE	148702	5043581053	0.0001	0
P. platypus	LINE	RTE-BOVB	240432422	5043581053	0.1158	0.0477
P. platypus	LINE	RTE-ORTE	0	5043581053	0	0
P. platypus	LINE	RTE-RTE	2806993	5043581053	0.0014	0.0006
P. platypus	LINE	RTE-X	9599224	5043581053	0.0046	0.0019
P. platypus	LINE	TAD1	0	5043581053	0	0
P. platypus	LTR	CAULIMOVIRUS	0	5043581053	0	0
P. platypus	LTR	COPIA	4515573	5043581053	0.0022	0.0009
P. platypus	LTR	DIRS	189602895	5043581053	0.0913	0.0376
P. platypus	LTR	ERV1	1614244	5043581053	0.0008	0.0003
P. platypus	LTR	ERV4	0	5043581053	0	0
P. platypus	LTR	ERVK	1181818	5043581053	0.0006	0.0002
P. platypus	LTR	ERVL	0	5043581053	0	0
P. platypus	LTR	ERVL-MALR	0	5043581053	0	0
P. platypus	LTR	GYPSY	300813615	5043581053	0.1448	0.0596
P. platypus	LTR	NGARO	0	5043581053	0	0
P. platypus	LTR	PAO	74570050	5043581053	0.0359	0.0148
P. platypus	SINE	5S	613252	5043581053	0.0003	0.0001
P. platypus	SINE	ALU	98243	5043581053	0	0
P. platypus	SINE	B2	0	5043581053	0	0
P. platypus	SINE	B4	0	5043581053	0	0
P. platypus	SINE	ID	0	5043581053	0	0
P. platypus	SINE	MIR	427399	5043581053	0.0002	0.0001
P. platypus	SINE	TRNA	30898943	5043581053	0.0149	0.0061
P. platypus	SINE	TRNA-CORE	206208	5043581053	0.0001	0
P. platypus	SINE	TRNA-CORE-RTE	0	5043581053	0	0
P. platypus	SINE	TRNA-DEU	0	5043581053	0	0
P. platypus	SINE	TRNA-DEU-L2	1281923	5043581053	0.0006	0.0003
P. platypus	SINE	TRNA-DEU-RTE	0	5043581053	0	0
P. platypus	SINE	TRNA-I	0	5043581053	0	0
P. platypus	SINE	TRNA-L2	204103	5043581053	0.0001	0
P. platypus	SINE	TRNA-META	0	5043581053	0	0
P. platypus	SINE	TRNA-RTE	27998639	5043581053	0.0135	0.0056
P. platypus	SINE	TRNA-V	0	5043581053	0	0
P. platypus	SINE	U	0	5043581053	0	0
P. platypus	SINE	U-L1	0	5043581053	0	0
H. azteca	DNA	ACADEM-1	186257	550885727	0.0044	0.0003
H. azteca	DNA	CMC-CHAPAEV	0	550885727	0	0
H. azteca	DNA	CMC-CHAPAEV-3	408479	550885727	0.0097	0.0007
H. azteca	DNA	CMC-ENSPM	886292	550885727	0.021	0.0016
H. azteca	DNA	CMC-MIRAGE	0	550885727	0	0
H. azteca	DNA	CMC-TRANSIB	0	550885727	0	0
H. azteca	DNA	CRYPTON	0	550885727	0	0
H. azteca	DNA	CRYPTON-H	0	550885727	0	0
H. azteca	DNA	CRYPTON-S	0	550885727	0	0
H. azteca	DNA	CRYPTON-V	0	550885727	0	0
H. azteca	DNA	CRYPTON-X	0	550885727	0	0
H. azteca	DNA	DADA	0	550885727	0	0
H. azteca	DNA	GINGER-1	0	550885727	0	0
H. azteca	DNA	GINGER-2	0	550885727	0	0
H. azteca	DNA	HAT	485006	550885727	0.0115	0.0009
H. azteca	DNA	HAT-AC	448818	550885727	0.0106	0.0008
H. azteca	DNA	HAT-BLACKJACK	652374	550885727	0.0154	0.0012
H. azteca	DNA	HAT-CHARLIE	2637055	550885727	0.0624	0.0048
H. azteca	DNA	HAT-HAT19	0	550885727	0	0
H. azteca	DNA	HAT-HAT5	256342	550885727	0.0061	0.0005
H. azteca	DNA	HAT-HAT6	0	550885727	0	0
H. azteca	DNA	HAT-HATM	178637	550885727	0.0042	0.0003
H. azteca	DNA	HAT-HATW	0	550885727	0	0
H. azteca	DNA	HAT-HATX	0	550885727	0	0
H. azteca	DNA	HAT-PEGASUS	0	550885727	0	0
H. azteca	DNA	HAT-TAG1	449484	550885727	0.0106	0.0008
H. azteca	DNA	HAT-TIP100	563758	550885727	0.0133	0.001
H. azteca	DNA	HELITRON	0	550885727	0	0
H. azteca	DNA	HELITRON-2	0	550885727	0	0
H. azteca	DNA	IS3EU	0	550885727	0	0
H. azteca	DNA	KOLOBOK-E	40601	550885727	0.001	0.0001
H. azteca	DNA	KOLOBOK-HYDRA	33952	550885727	0.0008	0.0001
H. azteca	DNA	KOLOBOK-T2	0	550885727	0	0
H. azteca	DNA	MAVERICK	1043729	550885727	0.0247	0.0019
H. azteca	DNA	MAVERICK-MAVIRUS	0	550885727	0	0
H. azteca	DNA	MERLIN	124525	550885727	0.0029	0.0002
H. azteca	DNA	MULE	0	550885727	0	0
H. azteca	DNA	MULE-MUDR	131907	550885727	0.0031	0.0002
H. azteca	DNA	MULE-NOF	0	550885727	0	0
H. azteca	DNA	NOVOSIB	0	550885727	0	0
H. azteca	DNA	P	0	550885727	0	0
H. azteca	DNA	PIF-HARBINGER	245802	550885727	0.0058	0.0004
H. azteca	DNA	PIF-HARBS	18983	550885727	0.0004	0
H. azteca	DNA	PIF-ISL2EU	220005	550885727	0.0052	0.0004
H. azteca	DNA	PIF-SPY	0	550885727	0	0
H. azteca	DNA	PIGGYBAC	690765	550885727	0.0164	0.0013
H. azteca	DNA	PIGGYBAC-X	0	550885727	0	0
H. azteca	DNA	SOLA-1	0	550885727	0	0
H. azteca	DNA	SOLA-2	168457	550885727	0.004	0.0003
H. azteca	DNA	SOLA-3	0	550885727	0	0
H. azteca	DNA	TCMAR	0	550885727	0	0
H. azteca	DNA	TCMAR-FOT1	1709361	550885727	0.0405	0.0031
H. azteca	DNA	TCMAR-ISRM11	0	550885727	0	0
H. azteca	DNA	TCMAR-M44	0	550885727	0	0
H. azteca	DNA	TCMAR-MARINER	562432	550885727	0.0133	0.001
H. azteca	DNA	TCMAR-POGO	0	550885727	0	0
H. azteca	DNA	TCMAR-STOWAWAY	0	550885727	0	0
H. azteca	DNA	TCMAR-TC1	5429254	550885727	0.1285	0.0099
H. azteca	DNA	TCMAR-TC2	0	550885727	0	0
H. azteca	DNA	TCMAR-TC4	0	550885727	0	0
H. azteca	DNA	TCMAR-TIGGER	438031	550885727	0.0104	0.0008
H. azteca	DNA	ZATOR	0	550885727	0	0
H. azteca	DNA	ZISUPTON	0	550885727	0	0
H. azteca	LINE	CR1	9151981	550885727	0.2166	0.0166
H. azteca	LINE	CR1-ZENON	0	550885727	0	0
H. azteca	LINE	CRE	243378	550885727	0.0058	0.0004
H. azteca	LINE	DONG-R4	0	550885727	0	0
H. azteca	LINE	I	3408528	550885727	0.0807	0.0062
H. azteca	LINE	I-JOCKEY	1927303	550885727	0.0456	0.0035
H. azteca	LINE	L1	87491	550885727	0.0021	0.0002
H. azteca	LINE	L1-TX1	0	550885727	0	0
H. azteca	LINE	L2	1290996	550885727	0.0306	0.0023
H. azteca	LINE	PENELOPE	4081663	550885727	0.0966	0.0074
H. azteca	LINE	PROTO2	0	550885727	0	0
H. azteca	LINE	R1	14228	550885727	0.0003	0
H. azteca	LINE	R1-LOA	93808	550885727	0.0022	0.0002
H. azteca	LINE	R2	159607	550885727	0.0038	0.0003
H. azteca	LINE	R2-NESL	0	550885727	0	0
H. azteca	LINE	REX-BABAR	0	550885727	0	0
H. azteca	LINE	RTE	0	550885727	0	0
H. azteca	LINE	RTE-BOVB	411429	550885727	0.0097	0.0007
H. azteca	LINE	RTE-ORTE	0	550885727	0	0
H. azteca	LINE	RTE-RTE	0	550885727	0	0
H. azteca	LINE	RTE-X	54667	550885727	0.0013	0.0001
H. azteca	LINE	TAD1	385676	550885727	0.0091	0.0007
H. azteca	LTR	CAULIMOVIRUS	0	550885727	0	0
H. azteca	LTR	COPIA	314857	550885727	0.0075	0.0006
H. azteca	LTR	DIRS	54139	550885727	0.0013	0.0001
H. azteca	LTR	ERV1	102671	550885727	0.0024	0.0002
H. azteca	LTR	ERV4	0	550885727	0	0
H. azteca	LTR	ERVK	19909	550885727	0.0005	0
H. azteca	LTR	ERVL	0	550885727	0	0
H. azteca	LTR	ERVL-MALR	0	550885727	0	0
H. azteca	LTR	GYPSY	1384339	550885727	0.0328	0.0025
H. azteca	LTR	NGARO	37286	550885727	0.0009	0.0001
H. azteca	LTR	PAO	648800	550885727	0.0154	0.0012
H. azteca	SINE	5S	0	550885727	0	0
H. azteca	SINE	ALU	0	550885727	0	0
H. azteca	SINE	B2	0	550885727	0	0
H. azteca	SINE	B4	0	550885727	0	0
H. azteca	SINE	ID	0	550885727	0	0
H. azteca	SINE	MIR	0	550885727	0	0
H. azteca	SINE	TRNA	169836	550885727	0.004	0.0003
H. azteca	SINE	TRNA-CORE	192511	550885727	0.0046	0.0003
H. azteca	SINE	TRNA-CORE-RTE	0	550885727	0	0
H. azteca	SINE	TRNA-DEU	0	550885727	0	0
H. azteca	SINE	TRNA-DEU-L2	0	550885727	0	0
H. azteca	SINE	TRNA-DEU-RTE	0	550885727	0	0
H. azteca	SINE	TRNA-I	0	550885727	0	0
H. azteca	SINE	TRNA-L2	0	550885727	0	0
H. azteca	SINE	TRNA-META	0	550885727	0	0
H. azteca	SINE	TRNA-RTE	0	550885727	0	0
H. azteca	SINE	TRNA-V	0	550885727	0	0
H. azteca	SINE	U	0	550885727	0	0
H. azteca	SINE	U-L1	0	550885727	0	0
C. brevimanus	DNA	ACADEM-1	4509358	4735323108	0.0027	0.001
C. brevimanus	DNA	CMC-CHAPAEV	0	4735323108	0	0
C. brevimanus	DNA	CMC-CHAPAEV-3	5775653	4735323108	0.0034	0.0012
C. brevimanus	DNA	CMC-ENSPM	2574962	4735323108	0.0015	0.0005
C. brevimanus	DNA	CMC-MIRAGE	0	4735323108	0	0
C. brevimanus	DNA	CMC-TRANSIB	0	4735323108	0	0
C. brevimanus	DNA	CRYPTON	0	4735323108	0	0
C. brevimanus	DNA	CRYPTON-H	0	4735323108	0	0
C. brevimanus	DNA	CRYPTON-S	0	4735323108	0	0
C. brevimanus	DNA	CRYPTON-V	234226	4735323108	0.0001	0
C. brevimanus	DNA	CRYPTON-X	0	4735323108	0	0
C. brevimanus	DNA	DADA	195683	4735323108	0.0001	0
C. brevimanus	DNA	GINGER-1	828399	4735323108	0.0005	0.0002
C. brevimanus	DNA	GINGER-2	963600	4735323108	0.0006	0.0002
C. brevimanus	DNA	HAT	115165	4735323108	0.0001	0
C. brevimanus	DNA	HAT-AC	3510522	4735323108	0.0021	0.0007
C. brevimanus	DNA	HAT-BLACKJACK	1161562	4735323108	0.0007	0.0002
C. brevimanus	DNA	HAT-CHARLIE	9094718	4735323108	0.0054	0.0019
C. brevimanus	DNA	HAT-HAT19	0	4735323108	0	0
C. brevimanus	DNA	HAT-HAT5	0	4735323108	0	0
C. brevimanus	DNA	HAT-HAT6	0	4735323108	0	0
C. brevimanus	DNA	HAT-HATM	7422137	4735323108	0.0044	0.0016
C. brevimanus	DNA	HAT-HATW	0	4735323108	0	0
C. brevimanus	DNA	HAT-HATX	0	4735323108	0	0
C. brevimanus	DNA	HAT-PEGASUS	0	4735323108	0	0
C. brevimanus	DNA	HAT-TAG1	0	4735323108	0	0
C. brevimanus	DNA	HAT-TIP100	4379442	4735323108	0.0026	0.0009
C. brevimanus	DNA	HELITRON	16414647	4735323108	0.0097	0.0035
C. brevimanus	DNA	HELITRON-2	0	4735323108	0	0
C. brevimanus	DNA	IS3EU	0	4735323108	0	0
C. brevimanus	DNA	KOLOBOK-E	0	4735323108	0	0
C. brevimanus	DNA	KOLOBOK-HYDRA	0	4735323108	0	0
C. brevimanus	DNA	KOLOBOK-T2	0	4735323108	0	0
C. brevimanus	DNA	MAVERICK	784792	4735323108	0.0005	0.0002
C. brevimanus	DNA	MAVERICK-MAVIRUS	0	4735323108	0	0
C. brevimanus	DNA	MERLIN	672525	4735323108	0.0004	0.0001
C. brevimanus	DNA	MULE	0	4735323108	0	0
C. brevimanus	DNA	MULE-MUDR	4200040	4735323108	0.0025	0.0009
C. brevimanus	DNA	MULE-NOF	0	4735323108	0	0
C. brevimanus	DNA	NOVOSIB	0	4735323108	0	0
C. brevimanus	DNA	P	3495211	4735323108	0.0021	0.0007
C. brevimanus	DNA	PIF-HARBINGER	6694321	4735323108	0.004	0.0014
C. brevimanus	DNA	PIF-HARBS	0	4735323108	0	0
C. brevimanus	DNA	PIF-ISL2EU	192729	4735323108	0.0001	0
C. brevimanus	DNA	PIF-SPY	0	4735323108	0	0
C. brevimanus	DNA	PIGGYBAC	58241968	4735323108	0.0346	0.0123
C. brevimanus	DNA	PIGGYBAC-X	0	4735323108	0	0
C. brevimanus	DNA	SOLA-1	328859	4735323108	0.0002	0.0001
C. brevimanus	DNA	SOLA-2	397814	4735323108	0.0002	0.0001
C. brevimanus	DNA	SOLA-3	0	4735323108	0	0
C. brevimanus	DNA	TCMAR	221916	4735323108	0.0001	0
C. brevimanus	DNA	TCMAR-FOT1	231863	4735323108	0.0001	0
C. brevimanus	DNA	TCMAR-ISRM11	0	4735323108	0	0
C. brevimanus	DNA	TCMAR-M44	3752577	4735323108	0.0022	0.0008
C. brevimanus	DNA	TCMAR-MARINER	7980970	4735323108	0.0047	0.0017
C. brevimanus	DNA	TCMAR-POGO	0	4735323108	0	0
C. brevimanus	DNA	TCMAR-STOWAWAY	0	4735323108	0	0
C. brevimanus	DNA	TCMAR-TC1	48793358	4735323108	0.029	0.0103
C. brevimanus	DNA	TCMAR-TC2	2183054	4735323108	0.0013	0.0005
C. brevimanus	DNA	TCMAR-TC4	158021	4735323108	0.0001	0
C. brevimanus	DNA	TCMAR-TIGGER	53649973	4735323108	0.0318	0.0113
C. brevimanus	DNA	ZATOR	0	4735323108	0	0
C. brevimanus	DNA	ZISUPTON	0	4735323108	0	0
C. brevimanus	LINE	CR1	159904188	4735323108	0.0949	0.0338
C. brevimanus	LINE	CR1-ZENON	241687067	4735323108	0.1435	0.051
C. brevimanus	LINE	CRE	5684111	4735323108	0.0034	0.0012
C. brevimanus	LINE	DONG-R4	0	4735323108	0	0
C. brevimanus	LINE	I	96517998	4735323108	0.0573	0.0204
C. brevimanus	LINE	I-JOCKEY	28180329	4735323108	0.0167	0.006
C. brevimanus	LINE	L1	884198	4735323108	0.0005	0.0002
C. brevimanus	LINE	L1-TX1	202577	4735323108	0.0001	0
C. brevimanus	LINE	L2	10928535	4735323108	0.0065	0.0023
C. brevimanus	LINE	PENELOPE	13331436	4735323108	0.0079	0.0028
C. brevimanus	LINE	PROTO2	3593834	4735323108	0.0021	0.0008
C. brevimanus	LINE	R1	979995	4735323108	0.0006	0.0002
C. brevimanus	LINE	R1-LOA	0	4735323108	0	0
C. brevimanus	LINE	R2	0	4735323108	0	0
C. brevimanus	LINE	R2-NESL	0	4735323108	0	0
C. brevimanus	LINE	REX-BABAR	610643	4735323108	0.0004	0.0001
C. brevimanus	LINE	RTE	0	4735323108	0	0
C. brevimanus	LINE	RTE-BOVB	476402633	4735323108	0.2828	0.1006
C. brevimanus	LINE	RTE-ORTE	0	4735323108	0	0
C. brevimanus	LINE	RTE-RTE	28699279	4735323108	0.017	0.0061
C. brevimanus	LINE	RTE-X	2159074	4735323108	0.0013	0.0005
C. brevimanus	LINE	TAD1	0	4735323108	0	0
C. brevimanus	LTR	CAULIMOVIRUS	0	4735323108	0	0
C. brevimanus	LTR	COPIA	21194045	4735323108	0.0126	0.0045
C. brevimanus	LTR	DIRS	209415	4735323108	0.0001	0
C. brevimanus	LTR	ERV1	0	4735323108	0	0
C. brevimanus	LTR	ERV4	288848	4735323108	0.0002	0.0001
C. brevimanus	LTR	ERVK	0	4735323108	0	0
C. brevimanus	LTR	ERVL	0	4735323108	0	0
C. brevimanus	LTR	ERVL-MALR	0	4735323108	0	0
C. brevimanus	LTR	GYPSY	296560102	4735323108	0.176	0.0626
C. brevimanus	LTR	NGARO	1166116	4735323108	0.0007	0.0002
C. brevimanus	LTR	PAO	17743410	4735323108	0.0105	0.0037
C. brevimanus	SINE	5S	4201897	4735323108	0.0025	0.0009
C. brevimanus	SINE	ALU	9934527	4735323108	0.0059	0.0021
C. brevimanus	SINE	B2	0	4735323108	0	0
C. brevimanus	SINE	B4	0	4735323108	0	0
C. brevimanus	SINE	ID	0	4735323108	0	0
C. brevimanus	SINE	MIR	0	4735323108	0	0
C. brevimanus	SINE	TRNA	4579301	4735323108	0.0027	0.001
C. brevimanus	SINE	TRNA-CORE	8549991	4735323108	0.0051	0.0018
C. brevimanus	SINE	TRNA-CORE-RTE	0	4735323108	0	0
C. brevimanus	SINE	TRNA-DEU	0	4735323108	0	0
C. brevimanus	SINE	TRNA-DEU-L2	0	4735323108	0	0
C. brevimanus	SINE	TRNA-DEU-RTE	0	4735323108	0	0
C. brevimanus	SINE	TRNA-I	0	4735323108	0	0
C. brevimanus	SINE	TRNA-L2	1171161	4735323108	0.0007	0.0002
C. brevimanus	SINE	TRNA-META	0	4735323108	0	0
C. brevimanus	SINE	TRNA-RTE	0	4735323108	0	0
C. brevimanus	SINE	TRNA-V	0	4735323108	0	0
C. brevimanus	SINE	U	0	4735323108	0	0
C. brevimanus	SINE	U-L1	0	4735323108	0	0
D. horrida	DNA	ACADEM-1	3675988	2577612728	0.0033	0.0014
D. horrida	DNA	CMC-CHAPAEV	1446951	2577612728	0.0013	0.0006
D. horrida	DNA	CMC-CHAPAEV-3	18124046	2577612728	0.0161	0.007
D. horrida	DNA	CMC-ENSPM	81967377	2577612728	0.0729	0.0318
D. horrida	DNA	CMC-MIRAGE	0	2577612728	0	0
D. horrida	DNA	CMC-TRANSIB	0	2577612728	0	0
D. horrida	DNA	CRYPTON	0	2577612728	0	0
D. horrida	DNA	CRYPTON-H	332678	2577612728	0.0003	0.0001
D. horrida	DNA	CRYPTON-S	0	2577612728	0	0
D. horrida	DNA	CRYPTON-V	0	2577612728	0	0
D. horrida	DNA	CRYPTON-X	0	2577612728	0	0
D. horrida	DNA	DADA	331936	2577612728	0.0003	0.0001
D. horrida	DNA	GINGER-1	690295	2577612728	0.0006	0.0003
D. horrida	DNA	GINGER-2	108645	2577612728	0.0001	0
D. horrida	DNA	HAT	2022838	2577612728	0.0018	0.0008
D. horrida	DNA	HAT-AC	11001923	2577612728	0.0098	0.0043
D. horrida	DNA	HAT-BLACKJACK	4448917	2577612728	0.004	0.0017
D. horrida	DNA	HAT-CHARLIE	7259151	2577612728	0.0065	0.0028
D. horrida	DNA	HAT-HAT19	170107	2577612728	0.0002	0.0001
D. horrida	DNA	HAT-HAT5	36863	2577612728	0	0
D. horrida	DNA	HAT-HAT6	0	2577612728	0	0
D. horrida	DNA	HAT-HATM	9419722	2577612728	0.0084	0.0037
D. horrida	DNA	HAT-HATW	0	2577612728	0	0
D. horrida	DNA	HAT-HATX	448328	2577612728	0.0004	0.0002
D. horrida	DNA	HAT-PEGASUS	0	2577612728	0	0
D. horrida	DNA	HAT-TAG1	1244877	2577612728	0.0011	0.0005
D. horrida	DNA	HAT-TIP100	6119360	2577612728	0.0054	0.0024
D. horrida	DNA	HELITRON	5221706	2577612728	0.0046	0.002
D. horrida	DNA	HELITRON-2	0	2577612728	0	0
D. horrida	DNA	IS3EU	0	2577612728	0	0
D. horrida	DNA	KOLOBOK-E	0	2577612728	0	0
D. horrida	DNA	KOLOBOK-HYDRA	33087	2577612728	0	0
D. horrida	DNA	KOLOBOK-T2	309055	2577612728	0.0003	0.0001
D. horrida	DNA	MAVERICK	4577991	2577612728	0.0041	0.0018
D. horrida	DNA	MAVERICK-MAVIRUS	0	2577612728	0	0
D. horrida	DNA	MERLIN	870894	2577612728	0.0008	0.0003
D. horrida	DNA	MULE	0	2577612728	0	0
D. horrida	DNA	MULE-MUDR	4408072	2577612728	0.0039	0.0017
D. horrida	DNA	MULE-NOF	0	2577612728	0	0
D. horrida	DNA	NOVOSIB	3344247	2577612728	0.003	0.0013
D. horrida	DNA	P	3081448	2577612728	0.0027	0.0012
D. horrida	DNA	PIF-HARBINGER	10723833	2577612728	0.0095	0.0042
D. horrida	DNA	PIF-HARBS	0	2577612728	0	0
D. horrida	DNA	PIF-ISL2EU	974206	2577612728	0.0009	0.0004
D. horrida	DNA	PIF-SPY	750819	2577612728	0.0007	0.0003
D. horrida	DNA	PIGGYBAC	1702837	2577612728	0.0015	0.0007
D. horrida	DNA	PIGGYBAC-X	0	2577612728	0	0
D. horrida	DNA	SOLA-1	16478130	2577612728	0.0147	0.0064
D. horrida	DNA	SOLA-2	238745	2577612728	0.0002	0.0001
D. horrida	DNA	SOLA-3	0	2577612728	0	0
D. horrida	DNA	TCMAR	110394	2577612728	0.0001	0
D. horrida	DNA	TCMAR-FOT1	639386	2577612728	0.0006	0.0002
D. horrida	DNA	TCMAR-ISRM11	1503475	2577612728	0.0013	0.0006
D. horrida	DNA	TCMAR-M44	983271	2577612728	0.0009	0.0004
D. horrida	DNA	TCMAR-MARINER	9332169	2577612728	0.0083	0.0036
D. horrida	DNA	TCMAR-POGO	462002	2577612728	0.0004	0.0002
D. horrida	DNA	TCMAR-STOWAWAY	0	2577612728	0	0
D. horrida	DNA	TCMAR-TC1	9063083	2577612728	0.0081	0.0035
D. horrida	DNA	TCMAR-TC2	4087865	2577612728	0.0036	0.0016
D. horrida	DNA	TCMAR-TC4	0	2577612728	0	0
D. horrida	DNA	TCMAR-TIGGER	15393164	2577612728	0.0137	0.006
D. horrida	DNA	ZATOR	0	2577612728	0	0
D. horrida	DNA	ZISUPTON	3264444	2577612728	0.0029	0.0013
D. horrida	LINE	CR1	337972812	2577612728	0.3006	0.1311
D. horrida	LINE	CR1-ZENON	103381865	2577612728	0.092	0.0401
D. horrida	LINE	CRE	6136191	2577612728	0.0055	0.0024
D. horrida	LINE	DONG-R4	0	2577612728	0	0
D. horrida	LINE	I	55437725	2577612728	0.0493	0.0215
D. horrida	LINE	I-JOCKEY	3578531	2577612728	0.0032	0.0014
D. horrida	LINE	L1	1323962	2577612728	0.0012	0.0005
D. horrida	LINE	L1-TX1	155936	2577612728	0.0001	0.0001
D. horrida	LINE	L2	13860601	2577612728	0.0123	0.0054
D. horrida	LINE	PENELOPE	16083462	2577612728	0.0143	0.0062
D. horrida	LINE	PROTO2	646099	2577612728	0.0006	0.0003
D. horrida	LINE	R1	325252	2577612728	0.0003	0.0001
D. horrida	LINE	R1-LOA	0	2577612728	0	0
D. horrida	LINE	R2	721870	2577612728	0.0006	0.0003
D. horrida	LINE	R2-NESL	0	2577612728	0	0
D. horrida	LINE	REX-BABAR	988594	2577612728	0.0009	0.0004
D. horrida	LINE	RTE	0	2577612728	0	0
D. horrida	LINE	RTE-BOVB	82130535	2577612728	0.0731	0.0319
D. horrida	LINE	RTE-ORTE	0	2577612728	0	0
D. horrida	LINE	RTE-RTE	21928534	2577612728	0.0195	0.0085
D. horrida	LINE	RTE-X	11727439	2577612728	0.0104	0.0045
D. horrida	LINE	TAD1	794993	2577612728	0.0007	0.0003
D. horrida	LTR	CAULIMOVIRUS	133154	2577612728	0.0001	0.0001
D. horrida	LTR	COPIA	5564361	2577612728	0.0049	0.0022
D. horrida	LTR	DIRS	21954423	2577612728	0.0195	0.0085
D. horrida	LTR	ERV1	3207013	2577612728	0.0029	0.0012
D. horrida	LTR	ERV4	0	2577612728	0	0
D. horrida	LTR	ERVK	8714688	2577612728	0.0078	0.0034
D. horrida	LTR	ERVL	0	2577612728	0	0
D. horrida	LTR	ERVL-MALR	0	2577612728	0	0
D. horrida	LTR	GYPSY	123073196	2577612728	0.1095	0.0477
D. horrida	LTR	NGARO	443906	2577612728	0.0004	0.0002
D. horrida	LTR	PAO	10882372	2577612728	0.0097	0.0042
D. horrida	SINE	5S	30178	2577612728	0	0
D. horrida	SINE	ALU	0	2577612728	0	0
D. horrida	SINE	B2	0	2577612728	0	0
D. horrida	SINE	B4	0	2577612728	0	0
D. horrida	SINE	ID	70909	2577612728	0.0001	0
D. horrida	SINE	MIR	0	2577612728	0	0
D. horrida	SINE	TRNA	43926174	2577612728	0.0391	0.017
D. horrida	SINE	TRNA-CORE	2406853	2577612728	0.0021	0.0009
D. horrida	SINE	TRNA-CORE-RTE	0	2577612728	0	0
D. horrida	SINE	TRNA-DEU	0	2577612728	0	0
D. horrida	SINE	TRNA-DEU-L2	0	2577612728	0	0
D. horrida	SINE	TRNA-DEU-RTE	107349	2577612728	0.0001	0
D. horrida	SINE	TRNA-I	0	2577612728	0	0
D. horrida	SINE	TRNA-L2	0	2577612728	0	0
D. horrida	SINE	TRNA-META	0	2577612728	0	0
D. horrida	SINE	TRNA-RTE	0	2577612728	0	0
D. horrida	SINE	TRNA-V	0	2577612728	0	0
D. horrida	SINE	U	151337	2577612728	0.0001	0.0001
D. horrida	SINE	U-L1	0	2577612728	0	0
C. philargius	DNA	ACADEM-1	0	707342361	0	0
C. philargius	DNA	CMC-CHAPAEV	0	707342361	0	0
C. philargius	DNA	CMC-CHAPAEV-3	128432	707342361	0.0018	0.0002
C. philargius	DNA	CMC-ENSPM	418382	707342361	0.0059	0.0006
C. philargius	DNA	CMC-MIRAGE	0	707342361	0	0
C. philargius	DNA	CMC-TRANSIB	0	707342361	0	0
C. philargius	DNA	CRYPTON	0	707342361	0	0
C. philargius	DNA	CRYPTON-H	0	707342361	0	0
C. philargius	DNA	CRYPTON-S	0	707342361	0	0
C. philargius	DNA	CRYPTON-V	0	707342361	0	0
C. philargius	DNA	CRYPTON-X	0	707342361	0	0
C. philargius	DNA	DADA	0	707342361	0	0
C. philargius	DNA	GINGER-1	45474	707342361	0.0006	0.0001
C. philargius	DNA	GINGER-2	313247	707342361	0.0044	0.0004
C. philargius	DNA	HAT	0	707342361	0	0
C. philargius	DNA	HAT-AC	1015934	707342361	0.0142	0.0014
C. philargius	DNA	HAT-BLACKJACK	78329	707342361	0.0011	0.0001
C. philargius	DNA	HAT-CHARLIE	5648635	707342361	0.0791	0.008
C. philargius	DNA	HAT-HAT19	0	707342361	0	0
C. philargius	DNA	HAT-HAT5	0	707342361	0	0
C. philargius	DNA	HAT-HAT6	0	707342361	0	0
C. philargius	DNA	HAT-HATM	0	707342361	0	0
C. philargius	DNA	HAT-HATW	0	707342361	0	0
C. philargius	DNA	HAT-HATX	0	707342361	0	0
C. philargius	DNA	HAT-PEGASUS	0	707342361	0	0
C. philargius	DNA	HAT-TAG1	168124	707342361	0.0024	0.0002
C. philargius	DNA	HAT-TIP100	27454	707342361	0.0004	0
C. philargius	DNA	HELITRON	593182	707342361	0.0083	0.0008
C. philargius	DNA	HELITRON-2	0	707342361	0	0
C. philargius	DNA	IS3EU	0	707342361	0	0
C. philargius	DNA	KOLOBOK-E	0	707342361	0	0
C. philargius	DNA	KOLOBOK-HYDRA	310257	707342361	0.0043	0.0004
C. philargius	DNA	KOLOBOK-T2	0	707342361	0	0
C. philargius	DNA	MAVERICK	0	707342361	0	0
C. philargius	DNA	MAVERICK-MAVIRUS	0	707342361	0	0
C. philargius	DNA	MERLIN	45336	707342361	0.0006	0.0001
C. philargius	DNA	MULE	0	707342361	0	0
C. philargius	DNA	MULE-MUDR	338707	707342361	0.0047	0.0005
C. philargius	DNA	MULE-NOF	88414	707342361	0.0012	0.0001
C. philargius	DNA	NOVOSIB	183281	707342361	0.0026	0.0003
C. philargius	DNA	P	0	707342361	0	0
C. philargius	DNA	PIF-HARBINGER	963216	707342361	0.0135	0.0014
C. philargius	DNA	PIF-HARBS	0	707342361	0	0
C. philargius	DNA	PIF-ISL2EU	0	707342361	0	0
C. philargius	DNA	PIF-SPY	0	707342361	0	0
C. philargius	DNA	PIGGYBAC	31713	707342361	0.0004	0
C. philargius	DNA	PIGGYBAC-X	0	707342361	0	0
C. philargius	DNA	SOLA-1	0	707342361	0	0
C. philargius	DNA	SOLA-2	4662144	707342361	0.0653	0.0066
C. philargius	DNA	SOLA-3	99035	707342361	0.0014	0.0001
C. philargius	DNA	TCMAR	0	707342361	0	0
C. philargius	DNA	TCMAR-FOT1	115561	707342361	0.0016	0.0002
C. philargius	DNA	TCMAR-ISRM11	0	707342361	0	0
C. philargius	DNA	TCMAR-M44	0	707342361	0	0
C. philargius	DNA	TCMAR-MARINER	992284	707342361	0.0139	0.0014
C. philargius	DNA	TCMAR-POGO	0	707342361	0	0
C. philargius	DNA	TCMAR-STOWAWAY	0	707342361	0	0
C. philargius	DNA	TCMAR-TC1	920175	707342361	0.0129	0.0013
C. philargius	DNA	TCMAR-TC2	595044	707342361	0.0083	0.0008
C. philargius	DNA	TCMAR-TC4	0	707342361	0	0
C. philargius	DNA	TCMAR-TIGGER	1653429	707342361	0.0231	0.0023
C. philargius	DNA	ZATOR	0	707342361	0	0
C. philargius	DNA	ZISUPTON	0	707342361	0	0
C. philargius	LINE	CR1	14834204	707342361	0.2077	0.021
C. philargius	LINE	CR1-ZENON	3941014	707342361	0.0552	0.0056
C. philargius	LINE	CRE	91679	707342361	0.0013	0.0001
C. philargius	LINE	DONG-R4	0	707342361	0	0
C. philargius	LINE	I	2464892	707342361	0.0345	0.0035
C. philargius	LINE	I-JOCKEY	3833354	707342361	0.0537	0.0054
C. philargius	LINE	L1	487005	707342361	0.0068	0.0007
C. philargius	LINE	L1-TX1	0	707342361	0	0
C. philargius	LINE	L2	2353435	707342361	0.0329	0.0033
C. philargius	LINE	PENELOPE	2173645	707342361	0.0304	0.0031
C. philargius	LINE	PROTO2	208723	707342361	0.0029	0.0003
C. philargius	LINE	R1	74693	707342361	0.001	0.0001
C. philargius	LINE	R1-LOA	0	707342361	0	0
C. philargius	LINE	R2	426877	707342361	0.006	0.0006
C. philargius	LINE	R2-NESL	79807	707342361	0.0011	0.0001
C. philargius	LINE	REX-BABAR	691632	707342361	0.0097	0.001
C. philargius	LINE	RTE	109961	707342361	0.0015	0.0002
C. philargius	LINE	RTE-BOVB	5887649	707342361	0.0824	0.0083
C. philargius	LINE	RTE-ORTE	0	707342361	0	0
C. philargius	LINE	RTE-RTE	542258	707342361	0.0076	0.0008
C. philargius	LINE	RTE-X	3845619	707342361	0.0538	0.0054
C. philargius	LINE	TAD1	0	707342361	0	0
C. philargius	LTR	CAULIMOVIRUS	0	707342361	0	0
C. philargius	LTR	COPIA	1209354	707342361	0.0169	0.0017
C. philargius	LTR	DIRS	71691	707342361	0.001	0.0001
C. philargius	LTR	ERV1	256355	707342361	0.0036	0.0004
C. philargius	LTR	ERV4	0	707342361	0	0
C. philargius	LTR	ERVK	0	707342361	0	0
C. philargius	LTR	ERVL	0	707342361	0	0
C. philargius	LTR	ERVL-MALR	0	707342361	0	0
C. philargius	LTR	GYPSY	5772238	707342361	0.0808	0.0082
C. philargius	LTR	NGARO	109472	707342361	0.0015	0.0002
C. philargius	LTR	PAO	405269	707342361	0.0057	0.0006
C. philargius	SINE	5S	39625	707342361	0.0006	0.0001
C. philargius	SINE	ALU	0	707342361	0	0
C. philargius	SINE	B2	0	707342361	0	0
C. philargius	SINE	B4	0	707342361	0	0
C. philargius	SINE	ID	0	707342361	0	0
C. philargius	SINE	MIR	0	707342361	0	0
C. philargius	SINE	TRNA	272629	707342361	0.0038	0.0004
C. philargius	SINE	TRNA-CORE	1763510	707342361	0.0247	0.0025
C. philargius	SINE	TRNA-CORE-RTE	0	707342361	0	0
C. philargius	SINE	TRNA-DEU	0	707342361	0	0
C. philargius	SINE	TRNA-DEU-L2	0	707342361	0	0
C. philargius	SINE	TRNA-DEU-RTE	0	707342361	0	0
C. philargius	SINE	TRNA-I	0	707342361	0	0
C. philargius	SINE	TRNA-L2	0	707342361	0	0
C. philargius	SINE	TRNA-META	0	707342361	0	0
C. philargius	SINE	TRNA-RTE	0	707342361	0	0
C. philargius	SINE	TRNA-V	0	707342361	0	0
C. philargius	SINE	U	55339	707342361	0.0008	0.0001
C. philargius	SINE	U-L1	0	707342361	0	0
L. dehaani	DNA	ACADEM-1	2878677	2147180685	0.0046	0.0013
L. dehaani	DNA	CMC-CHAPAEV	0	2147180685	0	0
L. dehaani	DNA	CMC-CHAPAEV-3	1270836	2147180685	0.002	0.0006
L. dehaani	DNA	CMC-ENSPM	210998	2147180685	0.0003	0.0001
L. dehaani	DNA	CMC-MIRAGE	0	2147180685	0	0
L. dehaani	DNA	CMC-TRANSIB	0	2147180685	0	0
L. dehaani	DNA	CRYPTON	0	2147180685	0	0
L. dehaani	DNA	CRYPTON-H	0	2147180685	0	0
L. dehaani	DNA	CRYPTON-S	13326	2147180685	0	0
L. dehaani	DNA	CRYPTON-V	0	2147180685	0	0
L. dehaani	DNA	CRYPTON-X	0	2147180685	0	0
L. dehaani	DNA	DADA	0	2147180685	0	0
L. dehaani	DNA	GINGER-1	0	2147180685	0	0
L. dehaani	DNA	GINGER-2	693979	2147180685	0.0011	0.0003
L. dehaani	DNA	HAT	0	2147180685	0	0
L. dehaani	DNA	HAT-AC	2012895	2147180685	0.0032	0.0009
L. dehaani	DNA	HAT-BLACKJACK	1732105	2147180685	0.0028	0.0008
L. dehaani	DNA	HAT-CHARLIE	3432121	2147180685	0.0055	0.0016
L. dehaani	DNA	HAT-HAT19	0	2147180685	0	0
L. dehaani	DNA	HAT-HAT5	0	2147180685	0	0
L. dehaani	DNA	HAT-HAT6	0	2147180685	0	0
L. dehaani	DNA	HAT-HATM	712217	2147180685	0.0011	0.0003
L. dehaani	DNA	HAT-HATW	0	2147180685	0	0
L. dehaani	DNA	HAT-HATX	221868	2147180685	0.0004	0.0001
L. dehaani	DNA	HAT-PEGASUS	0	2147180685	0	0
L. dehaani	DNA	HAT-TAG1	1183061	2147180685	0.0019	0.0006
L. dehaani	DNA	HAT-TIP100	3300639	2147180685	0.0053	0.0015
L. dehaani	DNA	HELITRON	3762564	2147180685	0.006	0.0018
L. dehaani	DNA	HELITRON-2	0	2147180685	0	0
L. dehaani	DNA	IS3EU	0	2147180685	0	0
L. dehaani	DNA	KOLOBOK-E	0	2147180685	0	0
L. dehaani	DNA	KOLOBOK-HYDRA	131475	2147180685	0.0002	0.0001
L. dehaani	DNA	KOLOBOK-T2	0	2147180685	0	0
L. dehaani	DNA	MAVERICK	1135996	2147180685	0.0018	0.0005
L. dehaani	DNA	MAVERICK-MAVIRUS	0	2147180685	0	0
L. dehaani	DNA	MERLIN	68075	2147180685	0.0001	0
L. dehaani	DNA	MULE	279656	2147180685	0.0004	0.0001
L. dehaani	DNA	MULE-MUDR	1291190	2147180685	0.0021	0.0006
L. dehaani	DNA	MULE-NOF	0	2147180685	0	0
L. dehaani	DNA	NOVOSIB	0	2147180685	0	0
L. dehaani	DNA	P	1776320	2147180685	0.0028	0.0008
L. dehaani	DNA	PIF-HARBINGER	5371702	2147180685	0.0086	0.0025
L. dehaani	DNA	PIF-HARBS	0	2147180685	0	0
L. dehaani	DNA	PIF-ISL2EU	1277758	2147180685	0.002	0.0006
L. dehaani	DNA	PIF-SPY	0	2147180685	0	0
L. dehaani	DNA	PIGGYBAC	1916090	2147180685	0.0031	0.0009
L. dehaani	DNA	PIGGYBAC-X	0	2147180685	0	0
L. dehaani	DNA	SOLA-1	207869	2147180685	0.0003	0.0001
L. dehaani	DNA	SOLA-2	690539	2147180685	0.0011	0.0003
L. dehaani	DNA	SOLA-3	0	2147180685	0	0
L. dehaani	DNA	TCMAR	201312	2147180685	0.0003	0.0001
L. dehaani	DNA	TCMAR-FOT1	890524	2147180685	0.0014	0.0004
L. dehaani	DNA	TCMAR-ISRM11	230561	2147180685	0.0004	0.0001
L. dehaani	DNA	TCMAR-M44	3367637	2147180685	0.0054	0.0016
L. dehaani	DNA	TCMAR-MARINER	2491192	2147180685	0.004	0.0012
L. dehaani	DNA	TCMAR-POGO	0	2147180685	0	0
L. dehaani	DNA	TCMAR-STOWAWAY	0	2147180685	0	0
L. dehaani	DNA	TCMAR-TC1	14649836	2147180685	0.0235	0.0068
L. dehaani	DNA	TCMAR-TC2	1682270	2147180685	0.0027	0.0008
L. dehaani	DNA	TCMAR-TC4	0	2147180685	0	0
L. dehaani	DNA	TCMAR-TIGGER	12747052	2147180685	0.0204	0.0059
L. dehaani	DNA	ZATOR	0	2147180685	0	0
L. dehaani	DNA	ZISUPTON	323073	2147180685	0.0005	0.0002
L. dehaani	LINE	CR1	209131078	2147180685	0.3348	0.0974
L. dehaani	LINE	CR1-ZENON	15727895	2147180685	0.0252	0.0073
L. dehaani	LINE	CRE	7337119	2147180685	0.0117	0.0034
L. dehaani	LINE	DONG-R4	0	2147180685	0	0
L. dehaani	LINE	I	84107184	2147180685	0.1346	0.0392
L. dehaani	LINE	I-JOCKEY	10218256	2147180685	0.0164	0.0048
L. dehaani	LINE	L1	348704	2147180685	0.0006	0.0002
L. dehaani	LINE	L1-TX1	556299	2147180685	0.0009	0.0003
L. dehaani	LINE	L2	12811414	2147180685	0.0205	0.006
L. dehaani	LINE	PENELOPE	1901888	2147180685	0.003	0.0009
L. dehaani	LINE	PROTO2	9408187	2147180685	0.0151	0.0044
L. dehaani	LINE	R1	23732846	2147180685	0.038	0.0111
L. dehaani	LINE	R1-LOA	0	2147180685	0	0
L. dehaani	LINE	R2	0	2147180685	0	0
L. dehaani	LINE	R2-NESL	294118	2147180685	0.0005	0.0001
L. dehaani	LINE	REX-BABAR	4419191	2147180685	0.0071	0.0021
L. dehaani	LINE	RTE	341195	2147180685	0.0005	0.0002
L. dehaani	LINE	RTE-BOVB	107686261	2147180685	0.1724	0.0502
L. dehaani	LINE	RTE-ORTE	988784	2147180685	0.0016	0.0005
L. dehaani	LINE	RTE-RTE	0	2147180685	0	0
L. dehaani	LINE	RTE-X	15884800	2147180685	0.0254	0.0074
L. dehaani	LINE	TAD1	0	2147180685	0	0
L. dehaani	LTR	CAULIMOVIRUS	0	2147180685	0	0
L. dehaani	LTR	COPIA	1952463	2147180685	0.0031	0.0009
L. dehaani	LTR	DIRS	7045395	2147180685	0.0113	0.0033
L. dehaani	LTR	ERV1	569833	2147180685	0.0009	0.0003
L. dehaani	LTR	ERV4	0	2147180685	0	0
L. dehaani	LTR	ERVK	0	2147180685	0	0
L. dehaani	LTR	ERVL	430568	2147180685	0.0007	0.0002
L. dehaani	LTR	ERVL-MALR	0	2147180685	0	0
L. dehaani	LTR	GYPSY	21482144	2147180685	0.0344	0.01
L. dehaani	LTR	NGARO	0	2147180685	0	0
L. dehaani	LTR	PAO	5640676	2147180685	0.009	0.0026
L. dehaani	SINE	5S	0	2147180685	0	0
L. dehaani	SINE	ALU	0	2147180685	0	0
L. dehaani	SINE	B2	0	2147180685	0	0
L. dehaani	SINE	B4	0	2147180685	0	0
L. dehaani	SINE	ID	331368	2147180685	0.0005	0.0002
L. dehaani	SINE	MIR	0	2147180685	0	0
L. dehaani	SINE	TRNA	3446993	2147180685	0.0055	0.0016
L. dehaani	SINE	TRNA-CORE	1443846	2147180685	0.0023	0.0007
L. dehaani	SINE	TRNA-CORE-RTE	0	2147180685	0	0
L. dehaani	SINE	TRNA-DEU	0	2147180685	0	0
L. dehaani	SINE	TRNA-DEU-L2	0	2147180685	0	0
L. dehaani	SINE	TRNA-DEU-RTE	2377749	2147180685	0.0038	0.0011
L. dehaani	SINE	TRNA-I	0	2147180685	0	0
L. dehaani	SINE	TRNA-L2	2692804	2147180685	0.0043	0.0013
L. dehaani	SINE	TRNA-META	221388	2147180685	0.0004	0.0001
L. dehaani	SINE	TRNA-RTE	0	2147180685	0	0
L. dehaani	SINE	TRNA-V	0	2147180685	0	0
L. dehaani	SINE	U	0	2147180685	0	0
L. dehaani	SINE	U-L1	0	2147180685	0	0
P. trituberculatus	DNA	ACADEM-1	547188	1022190805	0.0028	0.0005
P. trituberculatus	DNA	CMC-CHAPAEV	0	1022190805	0	0
P. trituberculatus	DNA	CMC-CHAPAEV-3	165248	1022190805	0.0009	0.0002
P. trituberculatus	DNA	CMC-ENSPM	3586229	1022190805	0.0186	0.0035
P. trituberculatus	DNA	CMC-MIRAGE	0	1022190805	0	0
P. trituberculatus	DNA	CMC-TRANSIB	0	1022190805	0	0
P. trituberculatus	DNA	CRYPTON	0	1022190805	0	0
P. trituberculatus	DNA	CRYPTON-H	0	1022190805	0	0
P. trituberculatus	DNA	CRYPTON-S	0	1022190805	0	0
P. trituberculatus	DNA	CRYPTON-V	0	1022190805	0	0
P. trituberculatus	DNA	CRYPTON-X	0	1022190805	0	0
P. trituberculatus	DNA	DADA	0	1022190805	0	0
P. trituberculatus	DNA	GINGER-1	0	1022190805	0	0
P. trituberculatus	DNA	GINGER-2	37492	1022190805	0.0002	0
P. trituberculatus	DNA	HAT	68398	1022190805	0.0004	0.0001
P. trituberculatus	DNA	HAT-AC	383876	1022190805	0.002	0.0004
P. trituberculatus	DNA	HAT-BLACKJACK	845859	1022190805	0.0044	0.0008
P. trituberculatus	DNA	HAT-CHARLIE	2081269	1022190805	0.0108	0.002
P. trituberculatus	DNA	HAT-HAT19	0	1022190805	0	0
P. trituberculatus	DNA	HAT-HAT5	0	1022190805	0	0
P. trituberculatus	DNA	HAT-HAT6	0	1022190805	0	0
P. trituberculatus	DNA	HAT-HATM	0	1022190805	0	0
P. trituberculatus	DNA	HAT-HATW	0	1022190805	0	0
P. trituberculatus	DNA	HAT-HATX	49020	1022190805	0.0003	0
P. trituberculatus	DNA	HAT-PEGASUS	0	1022190805	0	0
P. trituberculatus	DNA	HAT-TAG1	21439	1022190805	0.0001	0
P. trituberculatus	DNA	HAT-TIP100	292945	1022190805	0.0015	0.0003
P. trituberculatus	DNA	HELITRON	85295	1022190805	0.0004	0.0001
P. trituberculatus	DNA	HELITRON-2	0	1022190805	0	0
P. trituberculatus	DNA	IS3EU	0	1022190805	0	0
P. trituberculatus	DNA	KOLOBOK-E	0	1022190805	0	0
P. trituberculatus	DNA	KOLOBOK-HYDRA	0	1022190805	0	0
P. trituberculatus	DNA	KOLOBOK-T2	0	1022190805	0	0
P. trituberculatus	DNA	MAVERICK	0	1022190805	0	0
P. trituberculatus	DNA	MAVERICK-MAVIRUS	0	1022190805	0	0
P. trituberculatus	DNA	MERLIN	604723	1022190805	0.0031	0.0006
P. trituberculatus	DNA	MULE	0	1022190805	0	0
P. trituberculatus	DNA	MULE-MUDR	330519	1022190805	0.0017	0.0003
P. trituberculatus	DNA	MULE-NOF	0	1022190805	0	0
P. trituberculatus	DNA	NOVOSIB	0	1022190805	0	0
P. trituberculatus	DNA	P	299931	1022190805	0.0016	0.0003
P. trituberculatus	DNA	PIF-HARBINGER	1528138	1022190805	0.0079	0.0015
P. trituberculatus	DNA	PIF-HARBS	0	1022190805	0	0
P. trituberculatus	DNA	PIF-ISL2EU	0	1022190805	0	0
P. trituberculatus	DNA	PIF-SPY	0	1022190805	0	0
P. trituberculatus	DNA	PIGGYBAC	979359	1022190805	0.0051	0.001
P. trituberculatus	DNA	PIGGYBAC-X	0	1022190805	0	0
P. trituberculatus	DNA	SOLA-1	175289	1022190805	0.0009	0.0002
P. trituberculatus	DNA	SOLA-2	0	1022190805	0	0
P. trituberculatus	DNA	SOLA-3	0	1022190805	0	0
P. trituberculatus	DNA	TCMAR	100351	1022190805	0.0005	0.0001
P. trituberculatus	DNA	TCMAR-FOT1	154272	1022190805	0.0008	0.0002
P. trituberculatus	DNA	TCMAR-ISRM11	0	1022190805	0	0
P. trituberculatus	DNA	TCMAR-M44	0	1022190805	0	0
P. trituberculatus	DNA	TCMAR-MARINER	0	1022190805	0	0
P. trituberculatus	DNA	TCMAR-POGO	0	1022190805	0	0
P. trituberculatus	DNA	TCMAR-STOWAWAY	0	1022190805	0	0
P. trituberculatus	DNA	TCMAR-TC1	1454607	1022190805	0.0075	0.0014
P. trituberculatus	DNA	TCMAR-TC2	1040820	1022190805	0.0054	0.001
P. trituberculatus	DNA	TCMAR-TC4	0	1022190805	0	0
P. trituberculatus	DNA	TCMAR-TIGGER	12483320	1022190805	0.0646	0.0122
P. trituberculatus	DNA	ZATOR	0	1022190805	0	0
P. trituberculatus	DNA	ZISUPTON	0	1022190805	0	0
P. trituberculatus	LINE	CR1	72907240	1022190805	0.3775	0.0713
P. trituberculatus	LINE	CR1-ZENON	30083728	1022190805	0.1558	0.0294
P. trituberculatus	LINE	CRE	351216	1022190805	0.0018	0.0003
P. trituberculatus	LINE	DONG-R4	0	1022190805	0	0
P. trituberculatus	LINE	I	9715382	1022190805	0.0503	0.0095
P. trituberculatus	LINE	I-JOCKEY	2204937	1022190805	0.0114	0.0022
P. trituberculatus	LINE	L1	340679	1022190805	0.0018	0.0003
P. trituberculatus	LINE	L1-TX1	958496	1022190805	0.005	0.0009
P. trituberculatus	LINE	L2	4957890	1022190805	0.0257	0.0049
P. trituberculatus	LINE	PENELOPE	1139602	1022190805	0.0059	0.0011
P. trituberculatus	LINE	PROTO2	27820	1022190805	0.0001	0
P. trituberculatus	LINE	R1	76064	1022190805	0.0004	0.0001
P. trituberculatus	LINE	R1-LOA	0	1022190805	0	0
P. trituberculatus	LINE	R2	390219	1022190805	0.002	0.0004
P. trituberculatus	LINE	R2-NESL	0	1022190805	0	0
P. trituberculatus	LINE	REX-BABAR	1050587	1022190805	0.0054	0.001
P. trituberculatus	LINE	RTE	0	1022190805	0	0
P. trituberculatus	LINE	RTE-BOVB	2246974	1022190805	0.0116	0.0022
P. trituberculatus	LINE	RTE-ORTE	0	1022190805	0	0
P. trituberculatus	LINE	RTE-RTE	27045	1022190805	0.0001	0
P. trituberculatus	LINE	RTE-X	3766216	1022190805	0.0195	0.0037
P. trituberculatus	LINE	TAD1	0	1022190805	0	0
P. trituberculatus	LTR	CAULIMOVIRUS	12480	1022190805	0.0001	0
P. trituberculatus	LTR	COPIA	2873602	1022190805	0.0149	0.0028
P. trituberculatus	LTR	DIRS	3686035	1022190805	0.0191	0.0036
P. trituberculatus	LTR	ERV1	0	1022190805	0	0
P. trituberculatus	LTR	ERV4	0	1022190805	0	0
P. trituberculatus	LTR	ERVK	55355	1022190805	0.0003	0.0001
P. trituberculatus	LTR	ERVL	0	1022190805	0	0
P. trituberculatus	LTR	ERVL-MALR	0	1022190805	0	0
P. trituberculatus	LTR	GYPSY	10829469	1022190805	0.0561	0.0106
P. trituberculatus	LTR	NGARO	0	1022190805	0	0
P. trituberculatus	LTR	PAO	370906	1022190805	0.0019	0.0004
P. trituberculatus	SINE	5S	0	1022190805	0	0
P. trituberculatus	SINE	ALU	1371640	1022190805	0.0071	0.0013
P. trituberculatus	SINE	B2	0	1022190805	0	0
P. trituberculatus	SINE	B4	0	1022190805	0	0
P. trituberculatus	SINE	ID	0	1022190805	0	0
P. trituberculatus	SINE	MIR	0	1022190805	0	0
P. trituberculatus	SINE	TRNA	8443143	1022190805	0.0437	0.0083
P. trituberculatus	SINE	TRNA-CORE	7880235	1022190805	0.0408	0.0077
P. trituberculatus	SINE	TRNA-CORE-RTE	0	1022190805	0	0
P. trituberculatus	SINE	TRNA-DEU	0	1022190805	0	0
P. trituberculatus	SINE	TRNA-DEU-L2	0	1022190805	0	0
P. trituberculatus	SINE	TRNA-DEU-RTE	0	1022190805	0	0
P. trituberculatus	SINE	TRNA-I	0	1022190805	0	0
P. trituberculatus	SINE	TRNA-L2	0	1022190805	0	0
P. trituberculatus	SINE	TRNA-META	0	1022190805	0	0
P. trituberculatus	SINE	TRNA-RTE	0	1022190805	0	0
P. trituberculatus	SINE	TRNA-V	0	1022190805	0	0
P. trituberculatus	SINE	U	45813	1022190805	0.0002	0
P. trituberculatus	SINE	U-L1	0	1022190805	0	0
R. ranina	DNA	ACADEM-1	21889111	7478065989	0.0044	0.0029
R. ranina	DNA	CMC-CHAPAEV	0	7478065989	0	0
R. ranina	DNA	CMC-CHAPAEV-3	219317954	7478065989	0.0445	0.0293
R. ranina	DNA	CMC-ENSPM	825032	7478065989	0.0002	0.0001
R. ranina	DNA	CMC-MIRAGE	0	7478065989	0	0
R. ranina	DNA	CMC-TRANSIB	0	7478065989	0	0
R. ranina	DNA	CRYPTON	2012808	7478065989	0.0004	0.0003
R. ranina	DNA	CRYPTON-H	0	7478065989	0	0
R. ranina	DNA	CRYPTON-S	0	7478065989	0	0
R. ranina	DNA	CRYPTON-V	0	7478065989	0	0
R. ranina	DNA	CRYPTON-X	0	7478065989	0	0
R. ranina	DNA	DADA	0	7478065989	0	0
R. ranina	DNA	GINGER-1	0	7478065989	0	0
R. ranina	DNA	GINGER-2	0	7478065989	0	0
R. ranina	DNA	HAT	809197	7478065989	0.0002	0.0001
R. ranina	DNA	HAT-AC	7826757	7478065989	0.0016	0.001
R. ranina	DNA	HAT-BLACKJACK	1054480	7478065989	0.0002	0.0001
R. ranina	DNA	HAT-CHARLIE	7256424	7478065989	0.0015	0.001
R. ranina	DNA	HAT-HAT19	0	7478065989	0	0
R. ranina	DNA	HAT-HAT5	0	7478065989	0	0
R. ranina	DNA	HAT-HAT6	0	7478065989	0	0
R. ranina	DNA	HAT-HATM	70897344	7478065989	0.0144	0.0095
R. ranina	DNA	HAT-HATW	0	7478065989	0	0
R. ranina	DNA	HAT-HATX	0	7478065989	0	0
R. ranina	DNA	HAT-PEGASUS	0	7478065989	0	0
R. ranina	DNA	HAT-TAG1	0	7478065989	0	0
R. ranina	DNA	HAT-TIP100	8431225	7478065989	0.0017	0.0011
R. ranina	DNA	HELITRON	866468	7478065989	0.0002	0.0001
R. ranina	DNA	HELITRON-2	0	7478065989	0	0
R. ranina	DNA	IS3EU	0	7478065989	0	0
R. ranina	DNA	KOLOBOK-E	0	7478065989	0	0
R. ranina	DNA	KOLOBOK-HYDRA	849217	7478065989	0.0002	0.0001
R. ranina	DNA	KOLOBOK-T2	0	7478065989	0	0
R. ranina	DNA	MAVERICK	729513	7478065989	0.0001	0.0001
R. ranina	DNA	MAVERICK-MAVIRUS	0	7478065989	0	0
R. ranina	DNA	MERLIN	215851	7478065989	0	0
R. ranina	DNA	MULE	0	7478065989	0	0
R. ranina	DNA	MULE-MUDR	678040	7478065989	0.0001	0.0001
R. ranina	DNA	MULE-NOF	0	7478065989	0	0
R. ranina	DNA	NOVOSIB	0	7478065989	0	0
R. ranina	DNA	P	717313	7478065989	0.0001	0.0001
R. ranina	DNA	PIF-HARBINGER	4003053	7478065989	0.0008	0.0005
R. ranina	DNA	PIF-HARBS	0	7478065989	0	0
[truncated: 302 more rows]
