# Supplementary material for: Phylogenomics of crabs provides insights into their origin and evolution
Source: Research Square preprint supplement (doi:10.21203/rs.3.rs-5612812/v1), 2025-01-10
Supplement: Supplementary file 3 [file 88bb7613e07ea96dba4ebbc6.xlsx]

## Sheet: duanwei-ref_aijiexie-kegg.resul
	ID	Description	GeneRatio	BgRatio	pvalue	p.adjust	qvalue	geneID	Count
map02010	map02010	ABC transporters	23/159	69/6832	2.63435316039913e-21	4.89989687834238e-19	4.18723502337125e-19	A. integerrimus|evm.model.ctg015520_np12.6/A. integerrimus|evm.model.ctg029050_np12.204/A. integerrimus|evm.model.ctg018280_np12.28/A. integerrimus|evm.model.ctg029050_np12.193/A. integerrimus|evm.model.ctg019620_np12.254/A. integerrimus|evm.model.ctg019620_np12.252/A. integerrimus|evm.model.ctg019620_np12.263/A. integerrimus|evm.model.ctg017440_np12.6/A. integerrimus|evm.model.ctg015860_np12.1/A…	23
map01523	map01523	Antifolate resistance	18/159	46/6832	2.44311395787271e-18	2.27209598082162e-16	1.94163267178305e-16	A. integerrimus|evm.model.ctg015520_np12.6/A. integerrimus|evm.model.ctg029050_np12.204/A. integerrimus|evm.model.ctg018280_np12.28/A. integerrimus|evm.model.ctg029050_np12.193/A. integerrimus|evm.model.ctg019620_np12.254/A. integerrimus|evm.model.ctg019620_np12.252/A. integerrimus|evm.model.ctg019620_np12.263/A. integerrimus|evm.model.ctg017440_np12.6/A. integerrimus|evm.model.ctg015860_np12.1/A…	18
map05340	map05340	Primary immunodeficiency	12/159	27/6832	2.1420034723136e-13	1.32804215283443e-11	1.13488605024335e-11	A. integerrimus|evm.model.ctg028260_np12.18/A. integerrimus|evm.model.ctg023050_np12.152/A. integerrimus|evm.model.ctg021490_np12.5/A. integerrimus|evm.model.ctg011250_np12.10/A. integerrimus|evm.model.ctg009700_np12.70/A. integerrimus|evm.model.ctg019130_np12.40/A. integerrimus|evm.model.ctg017880_np12.76/A. integerrimus|evm.model.ctg019910_np12.15/A. integerrimus|evm.model.ctg021870_np12.37/A. …	12
map04071	map04071	Sphingolipid signaling pathway	18/159	101/6832	1.08322191506626e-11	5.03698190505813e-10	4.30438182039489e-10	A. integerrimus|evm.model.ctg018040_np12.257/A. integerrimus|evm.model.ctg015520_np12.6/A. integerrimus|evm.model.ctg029050_np12.204/A. integerrimus|evm.model.ctg018280_np12.28/A. integerrimus|evm.model.ctg029050_np12.193/A. integerrimus|evm.model.ctg019620_np12.254/A. integerrimus|evm.model.ctg019620_np12.252/A. integerrimus|evm.model.ctg019620_np12.263/A. integerrimus|evm.model.ctg017440_np12.6…	18
map04976	map04976	Bile secretion	19/159	138/6832	3.01487437059793e-10	1.12153326586243e-08	9.58412694653238e-09	A. integerrimus|evm.model.ctg016130_np12.42/A. integerrimus|evm.model.ctg015520_np12.6/A. integerrimus|evm.model.ctg029050_np12.204/A. integerrimus|evm.model.ctg018280_np12.28/A. integerrimus|evm.model.ctg029050_np12.193/A. integerrimus|evm.model.ctg019620_np12.254/A. integerrimus|evm.model.ctg019620_np12.252/A. integerrimus|evm.model.ctg019620_np12.263/A. integerrimus|evm.model.ctg017440_np12.6/…	19
map01524	map01524	Platinum drug resistance	15/159	98/6832	5.65788255374541e-09	1.75394359166108e-07	1.49884257125536e-07	A. integerrimus|evm.model.ctg015520_np12.6/A. integerrimus|evm.model.ctg029050_np12.204/A. integerrimus|evm.model.ctg018280_np12.28/A. integerrimus|evm.model.ctg029050_np12.193/A. integerrimus|evm.model.ctg019620_np12.254/A. integerrimus|evm.model.ctg019620_np12.252/A. integerrimus|evm.model.ctg019620_np12.263/A. integerrimus|evm.model.ctg017440_np12.6/A. integerrimus|evm.model.ctg015860_np12.1/A…	15
map04977	map04977	Vitamin digestion and absorption	15/159	104/6832	1.30962832306587e-08	3.47986954414645e-07	2.97374250801423e-07	A. integerrimus|evm.model.ctg025940_np12.19/A. integerrimus|evm.model.ctg015520_np12.6/A. integerrimus|evm.model.ctg029050_np12.204/A. integerrimus|evm.model.ctg018280_np12.28/A. integerrimus|evm.model.ctg029050_np12.193/A. integerrimus|evm.model.ctg019620_np12.254/A. integerrimus|evm.model.ctg019620_np12.252/A. integerrimus|evm.model.ctg019620_np12.263/A. integerrimus|evm.model.ctg017440_np12.6/…	15
map04730	map04730	Long-term depression	15/159	107/6832	1.94884975249135e-08	4.53107567454239e-07	3.8720567450815e-07	A. integerrimus|evm.model.ctg015770_np12.48/A. integerrimus|evm.model.ctg015790_np12.9/A. integerrimus|evm.model.ctg009690_np12.4/A. integerrimus|evm.model.ctg018040_np12.257/A. integerrimus|evm.model.ctg010860_np12.15/A. integerrimus|evm.model.ctg024180_np12.119/A. integerrimus|evm.model.ctg024240_np12.2/A. integerrimus|evm.model.ctg024490_np12.82/A. integerrimus|evm.model.ctg024490_np12.89/A. i…	15
map04940	map04940	Type I diabetes mellitus	6/159	11/6832	6.0693003101599e-08	1.25432206409971e-06	1.07188812495222e-06	A. integerrimus|evm.model.ctg010920_np12.12/A. integerrimus|evm.model.ctg026100_np12.128/A. integerrimus|evm.model.ctg010920_np12.14/A. integerrimus|evm.model.ctg007660_np12.56/A. integerrimus|evm.model.ctg007660_np12.59/A. integerrimus|evm.model.ctg007660_np12.66	6
map00430	map00430	Taurine and hypotaurine metabolism	6/159	14/6832	3.72237974193869e-07	6.92362632000597e-06	5.91662464244992e-06	A. integerrimus|evm.model.ctg010920_np12.12/A. integerrimus|evm.model.ctg026100_np12.128/A. integerrimus|evm.model.ctg010920_np12.14/A. integerrimus|evm.model.ctg007660_np12.56/A. integerrimus|evm.model.ctg007660_np12.59/A. integerrimus|evm.model.ctg007660_np12.66	6
map02024	map02024	Quorum sensing	6/159	17/6832	1.44756053085534e-06	2.44769326126449e-05	2.09169033645126e-05	A. integerrimus|evm.model.ctg010920_np12.12/A. integerrimus|evm.model.ctg026100_np12.128/A. integerrimus|evm.model.ctg010920_np12.14/A. integerrimus|evm.model.ctg007660_np12.56/A. integerrimus|evm.model.ctg007660_np12.59/A. integerrimus|evm.model.ctg007660_np12.66	6
map00650	map00650	Butanoate metabolism	6/159	30/6832	5.40391607740195e-05	0.000837606991997302	0.000715781866392714	A. integerrimus|evm.model.ctg010920_np12.12/A. integerrimus|evm.model.ctg026100_np12.128/A. integerrimus|evm.model.ctg010920_np12.14/A. integerrimus|evm.model.ctg007660_np12.56/A. integerrimus|evm.model.ctg007660_np12.59/A. integerrimus|evm.model.ctg007660_np12.66	6
map05206	map05206	MicroRNAs in cancer	16/159	234/6832	9.95037133935367e-05	0.00132567575302542	0.00113286382969348	A. integerrimus|evm.model.ctg015520_np12.6/A. integerrimus|evm.model.ctg029050_np12.204/A. integerrimus|evm.model.ctg018280_np12.28/A. integerrimus|evm.model.ctg029050_np12.193/A. integerrimus|evm.model.ctg019620_np12.254/A. integerrimus|evm.model.ctg019620_np12.252/A. integerrimus|evm.model.ctg019620_np12.263/A. integerrimus|evm.model.ctg017440_np12.6/A. integerrimus|evm.model.ctg015860_np12.1/A…	16
map05231	map05231	Choline metabolism in cancer	14/159	186/6832	9.97820459266444e-05	0.00132567575302542	0.00113286382969348	A. integerrimus|evm.model.ctg023400_np12.16/A. integerrimus|evm.model.ctg019300_np12.79/A. integerrimus|evm.model.ctg014890_np12.11/A. integerrimus|evm.model.ctg016060_np12.18/A. integerrimus|evm.model.ctg027590_np12.10/A. integerrimus|evm.model.ctg013530_np12.37/A. integerrimus|evm.model.ctg016060_np12.20/A. integerrimus|evm.model.ctg024490_np12.3/A. integerrimus|evm.model.ctg006170_np12.18/A. i…	14
map03018	map03018	RNA degradation	8/159	68/6832	0.00016297647088393	0.00202090823896073	0.0017269787441034	A. integerrimus|evm.model.ctg023320_np12.228/A. integerrimus|evm.model.ctg025540_np12.36/A. integerrimus|evm.model.ctg008930_np12.180/A. integerrimus|evm.model.ctg018670_np12.19/A. integerrimus|evm.model.ctg025420_np12.102/A. integerrimus|evm.model.ctg018680_np12.33/A. integerrimus|evm.model.ctg004400_np12.33/A. integerrimus|evm.model.ctg007300_np12.46	8
map00410	map00410	beta-Alanine metabolism	6/159	40/6832	0.000288220435007305	0.00335056255695992	0.00286324247934888	A. integerrimus|evm.model.ctg010920_np12.12/A. integerrimus|evm.model.ctg026100_np12.128/A. integerrimus|evm.model.ctg010920_np12.14/A. integerrimus|evm.model.ctg007660_np12.56/A. integerrimus|evm.model.ctg007660_np12.59/A. integerrimus|evm.model.ctg007660_np12.66	6
map00230	map00230	Purine metabolism	14/159	207/6832	0.000307989339852537	0.00336976571838658	0.00287965265125282	A. integerrimus|evm.model.ctg018980_np12.9/A. integerrimus|evm.model.ctg015580_np12.206/A. integerrimus|evm.model.ctg028260_np12.18/A. integerrimus|evm.model.ctg023050_np12.152/A. integerrimus|evm.model.ctg021490_np12.5/A. integerrimus|evm.model.ctg011250_np12.10/A. integerrimus|evm.model.ctg009700_np12.70/A. integerrimus|evm.model.ctg019130_np12.40/A. integerrimus|evm.model.ctg017880_np12.76/A. …	14
map00250	map00250	Alanine, aspartate and glutamate metabolism	6/159	46/6832	0.000626904193278893	0.00614191364639272	0.0052486075869004	A. integerrimus|evm.model.ctg010920_np12.12/A. integerrimus|evm.model.ctg026100_np12.128/A. integerrimus|evm.model.ctg010920_np12.14/A. integerrimus|evm.model.ctg007660_np12.56/A. integerrimus|evm.model.ctg007660_np12.59/A. integerrimus|evm.model.ctg007660_np12.66	6
map04080	map04080	Neuroactive ligand-receptor interaction	20/159	388/6832	0.000627399781083128	0.00614191364639272	0.0052486075869004	A. integerrimus|evm.model.ctg023120_np12.30/A. integerrimus|evm.model.ctg015770_np12.48/A. integerrimus|evm.model.ctg015790_np12.9/A. integerrimus|evm.model.ctg017670_np12.79/A. integerrimus|evm.model.ctg012160_np12.5/A. integerrimus|evm.model.ctg014880_np12.26/A. integerrimus|evm.model.ctg019310_np12.1/A. integerrimus|evm.model.ctg009690_np12.4/A. integerrimus|evm.model.ctg025750_np12.46/A. inte…	20
map04727	map04727	GABAergic synapse	7/159	69/6832	0.00104153293562595	0.00968625630132132	0.00827744596207991	A. integerrimus|evm.model.ctg024520_np12.507/A. integerrimus|evm.model.ctg010920_np12.12/A. integerrimus|evm.model.ctg026100_np12.128/A. integerrimus|evm.model.ctg010920_np12.14/A. integerrimus|evm.model.ctg007660_np12.56/A. integerrimus|evm.model.ctg007660_np12.59/A. integerrimus|evm.model.ctg007660_np12.66	7
map00770	map00770	Pantothenate and CoA biosynthesis	4/159	24/6832	0.00208675416224384	0.0184826797227312	0.0157944801252541	A. integerrimus|evm.model.ctg026100_np12.128/A. integerrimus|evm.model.ctg007660_np12.56/A. integerrimus|evm.model.ctg007660_np12.59/A. integerrimus|evm.model.ctg007660_np12.66	4

## Sheet: xie-ref_aijiexie-kegg.result
	ID	Description	GeneRatio	BgRatio	pvalue	p.adjust	qvalue	geneID	Count
map05231	map05231	Choline metabolism in cancer	57/270	186/6832	1.44154167989597e-36	2.2920512710346e-34	1.79054650766026e-34	A. integerrimus|evm.model.ctg023320_np12.239/A. integerrimus|evm.model.ctg024850_np12.2/A. integerrimus|evm.model.ctg025720_np12.54/A. integerrimus|evm.model.ctg007120_np12.224/A. integerrimus|evm.model.ctg003400_np12.20/A. integerrimus|evm.model.ctg023000_np12.52/A. integerrimus|evm.model.ctg023000_np12.62/A. integerrimus|evm.model.ctg027100_np12.20/A. integerrimus|evm.model.ctg018650_np12.9/A. …	57
map04080	map04080	Neuroactive ligand-receptor interaction	73/270	388/6832	1.50152080163004e-31	1.19370903729588e-29	9.32523445222868e-30	A. integerrimus|evm.model.ctg030450_np12.21/A. integerrimus|evm.model.ctg017800_np12.242/A. integerrimus|evm.model.ctg029120_np12.13/A. integerrimus|evm.model.ctg003400_np12.86/A. integerrimus|evm.model.ctg006170_np12.84/A. integerrimus|evm.model.ctg011140_np12.15/A. integerrimus|evm.model.ctg018040_np12.470/A. integerrimus|evm.model.ctg016450_np12.125/A. integerrimus|evm.model.ctg021980_np12.232…	73
map00592	map00592	alpha-Linolenic acid metabolism	26/270	48/6832	1.25711139511357e-24	6.6626903941019e-23	5.20488226748775e-23	A. integerrimus|evm.model.ctg022590_np12.441/A. integerrimus|evm.model.ctg023600_np12.54/A. integerrimus|evm.model.ctg026490_np12.109/A. integerrimus|evm.model.ctg028280_np12.69/A. integerrimus|evm.model.ctg011700_np12.5/A. integerrimus|evm.model.ctg005780_np12.387/A. integerrimus|evm.model.ctg006790_np12.38/A. integerrimus|evm.model.ctg019280_np12.87/A. integerrimus|evm.model.ctg007670_np12.433/…	26
map04724	map04724	Glutamatergic synapse	41/270	147/6832	1.71333216944624e-24	6.8104953735488e-23	5.32034726301726e-23	A. integerrimus|evm.model.ctg030450_np12.21/A. integerrimus|evm.model.ctg029120_np12.13/A. integerrimus|evm.model.ctg003400_np12.86/A. integerrimus|evm.model.ctg011140_np12.15/A. integerrimus|evm.model.ctg016450_np12.125/A. integerrimus|evm.model.ctg018040_np12.477/A. integerrimus|evm.model.ctg009420_np12.1/A. integerrimus|evm.model.ctg001410_np12.233/A. integerrimus|evm.model.ctg001830_np12.23/A…	41
map01040	map01040	Biosynthesis of unsaturated fatty acids	26/270	51/6832	1.02413989270593e-23	3.25676485880486e-22	2.54417910188e-22	A. integerrimus|evm.model.ctg022590_np12.441/A. integerrimus|evm.model.ctg023600_np12.54/A. integerrimus|evm.model.ctg026490_np12.109/A. integerrimus|evm.model.ctg028280_np12.69/A. integerrimus|evm.model.ctg011700_np12.5/A. integerrimus|evm.model.ctg005780_np12.387/A. integerrimus|evm.model.ctg006790_np12.38/A. integerrimus|evm.model.ctg019280_np12.87/A. integerrimus|evm.model.ctg007670_np12.433/…	26
map00071	map00071	Fatty acid degradation	26/270	83/6832	3.22594806128079e-17	8.5487623623941e-16	6.67827844265147e-16	A. integerrimus|evm.model.ctg022590_np12.441/A. integerrimus|evm.model.ctg023600_np12.54/A. integerrimus|evm.model.ctg026490_np12.109/A. integerrimus|evm.model.ctg028280_np12.69/A. integerrimus|evm.model.ctg011700_np12.5/A. integerrimus|evm.model.ctg005780_np12.387/A. integerrimus|evm.model.ctg006790_np12.38/A. integerrimus|evm.model.ctg019280_np12.87/A. integerrimus|evm.model.ctg007670_np12.433/…	26
map04977	map04977	Vitamin digestion and absorption	28/270	104/6832	1.58744058595563e-16	3.25322491953516e-15	2.54141370741575e-15	A. integerrimus|evm.model.ctg004720_np12.4/A. integerrimus|evm.model.ctg007360_np12.608/A. integerrimus|evm.model.ctg024920_np12.3/A. integerrimus|evm.model.ctg017210_np12.5/A. integerrimus|evm.model.ctg018070_np12.468/A. integerrimus|evm.model.ctg028290_np12.67/A. integerrimus|evm.model.ctg018070_np12.467/A. integerrimus|evm.model.ctg027270_np12.114/A. integerrimus|evm.model.ctg014730_np12.11/A.…	28
map01212	map01212	Fatty acid metabolism	26/270	88/6832	1.63684272681014e-16	3.25322491953516e-15	2.54141370741575e-15	A. integerrimus|evm.model.ctg022590_np12.441/A. integerrimus|evm.model.ctg023600_np12.54/A. integerrimus|evm.model.ctg026490_np12.109/A. integerrimus|evm.model.ctg028280_np12.69/A. integerrimus|evm.model.ctg011700_np12.5/A. integerrimus|evm.model.ctg005780_np12.387/A. integerrimus|evm.model.ctg006790_np12.38/A. integerrimus|evm.model.ctg019280_np12.87/A. integerrimus|evm.model.ctg007670_np12.433/…	26
map03320	map03320	PPAR signaling pathway	26/270	91/6832	4.09461961969373e-16	7.23382799479225e-15	5.65105397805684e-15	A. integerrimus|evm.model.ctg022590_np12.441/A. integerrimus|evm.model.ctg023600_np12.54/A. integerrimus|evm.model.ctg026490_np12.109/A. integerrimus|evm.model.ctg028280_np12.69/A. integerrimus|evm.model.ctg011700_np12.5/A. integerrimus|evm.model.ctg005780_np12.387/A. integerrimus|evm.model.ctg006790_np12.38/A. integerrimus|evm.model.ctg019280_np12.87/A. integerrimus|evm.model.ctg007670_np12.433/…	26
map04730	map04730	Long-term depression	27/270	107/6832	3.36761127862821e-15	5.35450193301885e-14	4.18292769345398e-14	A. integerrimus|evm.model.ctg017800_np12.242/A. integerrimus|evm.model.ctg006170_np12.84/A. integerrimus|evm.model.ctg018040_np12.470/A. integerrimus|evm.model.ctg021980_np12.232/A. integerrimus|evm.model.ctg010720_np12.43/A. integerrimus|evm.model.ctg027340_np12.103/A. integerrimus|evm.model.ctg027340_np12.84/A. integerrimus|evm.model.ctg017120_np12.48/A. integerrimus|evm.model.ctg017120_np12.55…	27
map04024	map04024	cAMP signaling pathway	36/270	224/6832	2.503326837964e-13	3.61844515669341e-12	2.8267231280359e-12	A. integerrimus|evm.model.ctg022590_np12.441/A. integerrimus|evm.model.ctg023600_np12.54/A. integerrimus|evm.model.ctg018040_np12.477/A. integerrimus|evm.model.ctg009420_np12.1/A. integerrimus|evm.model.ctg001410_np12.233/A. integerrimus|evm.model.ctg030530_np12.13/A. integerrimus|evm.model.ctg025120_np12.7/A. integerrimus|evm.model.ctg008460_np12.26/A. integerrimus|evm.model.ctg018600_np12.5/A. …	36
map04146	map04146	Peroxisome	29/270	149/6832	4.34716859177361e-13	5.75999838410004e-12	4.49970082306392e-12	A. integerrimus|evm.model.ctg022590_np12.441/A. integerrimus|evm.model.ctg023600_np12.54/A. integerrimus|evm.model.ctg026490_np12.109/A. integerrimus|evm.model.ctg028280_np12.69/A. integerrimus|evm.model.ctg011700_np12.5/A. integerrimus|evm.model.ctg005780_np12.387/A. integerrimus|evm.model.ctg006790_np12.38/A. integerrimus|evm.model.ctg019280_np12.87/A. integerrimus|evm.model.ctg007670_np12.433/…	29
map00591	map00591	Linoleic acid metabolism	21/270	77/6832	8.63352238575553e-13	1.05594619948856e-11	8.24903353456804e-12	A. integerrimus|evm.model.ctg029530_np12.75/A. integerrimus|evm.model.ctg026370_np12.38/A. integerrimus|evm.model.ctg029530_np12.95/A. integerrimus|evm.model.ctg026930_np12.37/A. integerrimus|evm.model.ctg024120_np12.41/A. integerrimus|evm.model.ctg009140_np12.85/A. integerrimus|evm.model.ctg023440_np12.16/A. integerrimus|evm.model.ctg024760_np12.37/A. integerrimus|evm.model.ctg009140_np12.87/A. …	21
map04913	map04913	Ovarian steroidogenesis	23/270	99/6832	2.72318336846095e-12	3.09275825418065e-11	2.41605742464956e-11	A. integerrimus|evm.model.ctg005770_np12.185/A. integerrimus|evm.model.ctg029530_np12.75/A. integerrimus|evm.model.ctg026370_np12.38/A. integerrimus|evm.model.ctg029530_np12.95/A. integerrimus|evm.model.ctg026930_np12.37/A. integerrimus|evm.model.ctg024120_np12.41/A. integerrimus|evm.model.ctg009140_np12.85/A. integerrimus|evm.model.ctg023440_np12.16/A. integerrimus|evm.model.ctg024760_np12.37/A.…	23
map00590	map00590	Arachidonic acid metabolism	21/270	107/6832	7.34295766696518e-10	7.78353512698309e-09	6.08048424352204e-09	A. integerrimus|evm.model.ctg029530_np12.75/A. integerrimus|evm.model.ctg026370_np12.38/A. integerrimus|evm.model.ctg029530_np12.95/A. integerrimus|evm.model.ctg026930_np12.37/A. integerrimus|evm.model.ctg024120_np12.41/A. integerrimus|evm.model.ctg009140_np12.85/A. integerrimus|evm.model.ctg023440_np12.16/A. integerrimus|evm.model.ctg024760_np12.37/A. integerrimus|evm.model.ctg009140_np12.87/A. …	21
map05030	map05030	Cocaine addiction	19/270	88/6832	8.90475129136192e-10	8.8490965957909e-09	6.91289902882043e-09	A. integerrimus|evm.model.ctg018040_np12.477/A. integerrimus|evm.model.ctg009420_np12.1/A. integerrimus|evm.model.ctg001410_np12.233/A. integerrimus|evm.model.ctg025120_np12.7/A. integerrimus|evm.model.ctg008460_np12.26/A. integerrimus|evm.model.ctg018600_np12.5/A. integerrimus|evm.model.ctg017670_np12.79/A. integerrimus|evm.model.ctg005770_np12.185/A. integerrimus|evm.model.ctg020960_np12.342/A.…	19
map01110	map01110	Biosynthesis of secondary metabolites	48/270	488/6832	1.95763104125699e-09	1.83096079741095e-08	1.43034342333328e-08	A. integerrimus|evm.model.ctg022590_np12.441/A. integerrimus|evm.model.ctg023600_np12.54/A. integerrimus|evm.model.ctg026490_np12.109/A. integerrimus|evm.model.ctg028280_np12.69/A. integerrimus|evm.model.ctg011700_np12.5/A. integerrimus|evm.model.ctg005780_np12.387/A. integerrimus|evm.model.ctg006790_np12.38/A. integerrimus|evm.model.ctg019280_np12.87/A. integerrimus|evm.model.ctg007670_np12.433/…	48
map04750	map04750	Inflammatory mediator regulation of TRP channels	22/270	135/6832	1.11453481359506e-08	9.84505752008971e-08	7.69094198855071e-08	A. integerrimus|evm.model.ctg005770_np12.185/A. integerrimus|evm.model.ctg029530_np12.75/A. integerrimus|evm.model.ctg026370_np12.38/A. integerrimus|evm.model.ctg029530_np12.95/A. integerrimus|evm.model.ctg026930_np12.37/A. integerrimus|evm.model.ctg024120_np12.41/A. integerrimus|evm.model.ctg009140_np12.85/A. integerrimus|evm.model.ctg023440_np12.16/A. integerrimus|evm.model.ctg024760_np12.37/A.…	22
map00982	map00982	Drug metabolism - cytochrome P450	21/270	126/6832	1.61466459655998e-08	1.35121932027914e-07	1.05557020716941e-07	A. integerrimus|evm.model.ctg027370_np12.154/A. integerrimus|evm.model.ctg010710_np12.141/A. integerrimus|evm.model.ctg025450_np12.21/A. integerrimus|evm.model.ctg007680_np12.128/A. integerrimus|evm.model.ctg007680_np12.131/A. integerrimus|evm.model.ctg010430_np12.287/A. integerrimus|evm.model.ctg010430_np12.277/A. integerrimus|evm.model.ctg010430_np12.282/A. integerrimus|evm.model.ctg010430_np12…	21
map00980	map00980	Metabolism of xenobiotics by cytochrome P450	21/270	133/6832	4.31792298811426e-08	3.43274877555084e-07	2.68165743472359e-07	A. integerrimus|evm.model.ctg027370_np12.154/A. integerrimus|evm.model.ctg010710_np12.141/A. integerrimus|evm.model.ctg025450_np12.21/A. integerrimus|evm.model.ctg007680_np12.128/A. integerrimus|evm.model.ctg007680_np12.131/A. integerrimus|evm.model.ctg010430_np12.287/A. integerrimus|evm.model.ctg010430_np12.277/A. integerrimus|evm.model.ctg010430_np12.282/A. integerrimus|evm.model.ctg010430_np12…	21
map04726	map04726	Serotonergic synapse	24/270	175/6832	7.54706704426616e-08	5.59871955971141e-07	4.37371008305824e-07	A. integerrimus|evm.model.ctg005770_np12.185/A. integerrimus|evm.model.ctg029530_np12.75/A. integerrimus|evm.model.ctg026370_np12.38/A. integerrimus|evm.model.ctg029530_np12.95/A. integerrimus|evm.model.ctg026930_np12.37/A. integerrimus|evm.model.ctg024120_np12.41/A. integerrimus|evm.model.ctg009140_np12.85/A. integerrimus|evm.model.ctg023440_np12.16/A. integerrimus|evm.model.ctg024760_np12.37/A.…	24
map04392	map04392	Hippo signaling pathway - multiple species	12/270	44/6832	7.74665599456925e-08	5.59871955971141e-07	4.37371008305824e-07	A. integerrimus|evm.model.ctg028020_np12.103/A. integerrimus|evm.model.ctg028020_np12.79/A. integerrimus|evm.model.ctg028020_np12.98/A. integerrimus|evm.model.ctg028020_np12.113/A. integerrimus|evm.model.ctg017800_np12.426/A. integerrimus|evm.model.ctg021290_np12.69/A. integerrimus|evm.model.ctg023710_np12.14/A. integerrimus|evm.model.ctg021290_np12.38/A. integerrimus|evm.model.ctg006750_np12.17/…	12
map00860	map00860	Porphyrin metabolism	17/270	92/6832	8.26211162225282e-08	5.71163368668782e-07	4.46191840469489e-07	A. integerrimus|evm.model.ctg027370_np12.154/A. integerrimus|evm.model.ctg010710_np12.141/A. integerrimus|evm.model.ctg025450_np12.21/A. integerrimus|evm.model.ctg007680_np12.128/A. integerrimus|evm.model.ctg007680_np12.131/A. integerrimus|evm.model.ctg010430_np12.287/A. integerrimus|evm.model.ctg010430_np12.277/A. integerrimus|evm.model.ctg010430_np12.282/A. integerrimus|evm.model.ctg010430_np12…	17
map00053	map00053	Ascorbate and aldarate metabolism	17/270	100/6832	2.92932539844728e-07	1.94067807647132e-06	1.51605437288061e-06	A. integerrimus|evm.model.ctg027370_np12.154/A. integerrimus|evm.model.ctg010710_np12.141/A. integerrimus|evm.model.ctg025450_np12.21/A. integerrimus|evm.model.ctg007680_np12.128/A. integerrimus|evm.model.ctg007680_np12.131/A. integerrimus|evm.model.ctg010430_np12.287/A. integerrimus|evm.model.ctg010430_np12.277/A. integerrimus|evm.model.ctg010430_np12.282/A. integerrimus|evm.model.ctg010430_np12…	17
map00830	map00830	Retinol metabolism	19/270	126/6832	4.08754634627251e-07	2.59967947622932e-06	2.03086513204276e-06	A. integerrimus|evm.model.ctg027370_np12.154/A. integerrimus|evm.model.ctg010710_np12.141/A. integerrimus|evm.model.ctg025450_np12.21/A. integerrimus|evm.model.ctg007680_np12.128/A. integerrimus|evm.model.ctg007680_np12.131/A. integerrimus|evm.model.ctg010430_np12.287/A. integerrimus|evm.model.ctg010430_np12.277/A. integerrimus|evm.model.ctg010430_np12.282/A. integerrimus|evm.model.ctg010430_np12…	19
map04212	map04212	Longevity regulating pathway - worm	19/270	130/6832	6.71992237942919e-07	4.10949099357401e-06	3.21032729057751e-06	A. integerrimus|evm.model.ctg029530_np12.75/A. integerrimus|evm.model.ctg026370_np12.38/A. integerrimus|evm.model.ctg029530_np12.95/A. integerrimus|evm.model.ctg026930_np12.37/A. integerrimus|evm.model.ctg024120_np12.41/A. integerrimus|evm.model.ctg009140_np12.85/A. integerrimus|evm.model.ctg023440_np12.16/A. integerrimus|evm.model.ctg024760_np12.37/A. integerrimus|evm.model.ctg009140_np12.87/A. …	19
map05204	map05204	Chemical carcinogenesis - DNA adducts	19/270	131/6832	7.5839881363178e-07	4.4661263469427e-06	3.48893021475828e-06	A. integerrimus|evm.model.ctg027370_np12.154/A. integerrimus|evm.model.ctg010710_np12.141/A. integerrimus|evm.model.ctg025450_np12.21/A. integerrimus|evm.model.ctg007680_np12.128/A. integerrimus|evm.model.ctg007680_np12.131/A. integerrimus|evm.model.ctg010430_np12.287/A. integerrimus|evm.model.ctg010430_np12.277/A. integerrimus|evm.model.ctg010430_np12.282/A. integerrimus|evm.model.ctg010430_np12…	19
map00140	map00140	Steroid hormone biosynthesis	25/270	217/6832	1.2000318649027e-06	6.81446666141175e-06	5.32344962626009e-06	A. integerrimus|evm.model.ctg027370_np12.154/A. integerrimus|evm.model.ctg010710_np12.141/A. integerrimus|evm.model.ctg025450_np12.21/A. integerrimus|evm.model.ctg007680_np12.128/A. integerrimus|evm.model.ctg007680_np12.131/A. integerrimus|evm.model.ctg010430_np12.287/A. integerrimus|evm.model.ctg010430_np12.277/A. integerrimus|evm.model.ctg010430_np12.282/A. integerrimus|evm.model.ctg010430_np12…	25
map00040	map00040	Pentose and glucuronate interconversions	17/270	111/6832	1.35572221337812e-06	7.43309765265935e-06	5.80672309178288e-06	A. integerrimus|evm.model.ctg027370_np12.154/A. integerrimus|evm.model.ctg010710_np12.141/A. integerrimus|evm.model.ctg025450_np12.21/A. integerrimus|evm.model.ctg007680_np12.128/A. integerrimus|evm.model.ctg007680_np12.131/A. integerrimus|evm.model.ctg010430_np12.287/A. integerrimus|evm.model.ctg010430_np12.277/A. integerrimus|evm.model.ctg010430_np12.282/A. integerrimus|evm.model.ctg010430_np12…	17
map00565	map00565	Ether lipid metabolism	15/270	99/6832	6.59236117295274e-06	3.49395142166495e-05	2.72946883652078e-05	A. integerrimus|evm.model.ctg010710_np12.141/A. integerrimus|evm.model.ctg025450_np12.21/A. integerrimus|evm.model.ctg007680_np12.131/A. integerrimus|evm.model.ctg010430_np12.287/A. integerrimus|evm.model.ctg010430_np12.277/A. integerrimus|evm.model.ctg010430_np12.282/A. integerrimus|evm.model.ctg010430_np12.283/A. integerrimus|evm.model.ctg010430_np12.280/A. integerrimus|evm.model.ctg010430_np12…	15
map00600	map00600	Sphingolipid metabolism	15/270	115/6832	4.15316470589662e-05	0.000213017157495988	0.000166408636772768	A. integerrimus|evm.model.ctg010710_np12.141/A. integerrimus|evm.model.ctg025450_np12.21/A. integerrimus|evm.model.ctg007680_np12.131/A. integerrimus|evm.model.ctg010430_np12.287/A. integerrimus|evm.model.ctg010430_np12.277/A. integerrimus|evm.model.ctg010430_np12.282/A. integerrimus|evm.model.ctg010430_np12.283/A. integerrimus|evm.model.ctg010430_np12.280/A. integerrimus|evm.model.ctg010430_np12…	15
map04720	map04720	Long-term potentiation	10/270	66/6832	0.000233985231988793	0.00116261412144432	0.000908232150482815	A. integerrimus|evm.model.ctg018040_np12.477/A. integerrimus|evm.model.ctg009420_np12.1/A. integerrimus|evm.model.ctg001410_np12.233/A. integerrimus|evm.model.ctg025120_np12.7/A. integerrimus|evm.model.ctg008460_np12.26/A. integerrimus|evm.model.ctg018600_np12.5/A. integerrimus|evm.model.ctg017670_np12.79/A. integerrimus|evm.model.ctg005770_np12.185/A. integerrimus|evm.model.ctg009680_np12.80/A. …	10
map00983	map00983	Drug metabolism - other enzymes	19/270	196/6832	0.00025146762013789	0.00121161671520983	0.000946512892385041	A. integerrimus|evm.model.ctg027370_np12.154/A. integerrimus|evm.model.ctg010710_np12.141/A. integerrimus|evm.model.ctg025450_np12.21/A. integerrimus|evm.model.ctg007680_np12.128/A. integerrimus|evm.model.ctg007680_np12.131/A. integerrimus|evm.model.ctg010430_np12.287/A. integerrimus|evm.model.ctg010430_np12.277/A. integerrimus|evm.model.ctg010430_np12.282/A. integerrimus|evm.model.ctg010430_np12…	19
map00512	map00512	Mucin type O-glycan biosynthesis	7/270	41/6832	0.000986998663939603	0.00461567022254108	0.00360575363296821	A. integerrimus|evm.model.ctg017800_np12.242/A. integerrimus|evm.model.ctg018040_np12.470/A. integerrimus|evm.model.ctg021980_np12.232/A. integerrimus|evm.model.ctg007860_np12.31/A. integerrimus|evm.model.ctg018070_np12.8/A. integerrimus|evm.model.ctg011760_np12.44/A. integerrimus|evm.model.ctg011760_np12.7	7
map04391	map04391	Hippo signaling pathway - fly	12/270	109/6832	0.00116337045716662	0.00528502579112835	0.00412865305099732	A. integerrimus|evm.model.ctg028020_np12.103/A. integerrimus|evm.model.ctg028020_np12.79/A. integerrimus|evm.model.ctg028020_np12.98/A. integerrimus|evm.model.ctg028020_np12.113/A. integerrimus|evm.model.ctg017800_np12.426/A. integerrimus|evm.model.ctg021290_np12.69/A. integerrimus|evm.model.ctg023710_np12.14/A. integerrimus|evm.model.ctg021290_np12.38/A. integerrimus|evm.model.ctg006750_np12.17/…	12
map05033	map05033	Nicotine addiction	8/270	57/6832	0.00164615179174277	0.00727050374686389	0.00567970501244581	A. integerrimus|evm.model.ctg018040_np12.477/A. integerrimus|evm.model.ctg009420_np12.1/A. integerrimus|evm.model.ctg001410_np12.233/A. integerrimus|evm.model.ctg030530_np12.13/A. integerrimus|evm.model.ctg025120_np12.7/A. integerrimus|evm.model.ctg008460_np12.26/A. integerrimus|evm.model.ctg018600_np12.5/A. integerrimus|evm.model.ctg017670_np12.79	8
map04713	map04713	Circadian entrainment	9/270	82/6832	0.0048184564082612	0.0207063397003657	0.0161757569324274	A. integerrimus|evm.model.ctg018040_np12.477/A. integerrimus|evm.model.ctg009420_np12.1/A. integerrimus|evm.model.ctg001410_np12.233/A. integerrimus|evm.model.ctg030530_np12.13/A. integerrimus|evm.model.ctg025120_np12.7/A. integerrimus|evm.model.ctg008460_np12.26/A. integerrimus|evm.model.ctg018600_np12.5/A. integerrimus|evm.model.ctg017670_np12.79/A. integerrimus|evm.model.ctg005770_np12.185	9
map05031	map05031	Amphetamine addiction	9/270	90/6832	0.00883607107550891	0.0369719816054189	0.0288824483908602	A. integerrimus|evm.model.ctg018040_np12.477/A. integerrimus|evm.model.ctg009420_np12.1/A. integerrimus|evm.model.ctg001410_np12.233/A. integerrimus|evm.model.ctg030530_np12.13/A. integerrimus|evm.model.ctg025120_np12.7/A. integerrimus|evm.model.ctg008460_np12.26/A. integerrimus|evm.model.ctg018600_np12.5/A. integerrimus|evm.model.ctg017670_np12.79/A. integerrimus|evm.model.ctg005770_np12.185	9
map04072	map04072	Phospholipase D signaling pathway	11/270	125/6832	0.0102546818067251	0.0418075489043407	0.0326599852413916	A. integerrimus|evm.model.ctg020960_np12.342/A. integerrimus|evm.model.ctg023540_np12.64/A. integerrimus|evm.model.ctg024450_np12.1/A. integerrimus|evm.model.ctg026740_np12.88/A. integerrimus|evm.model.ctg020960_np12.348/A. integerrimus|evm.model.ctg005400_np12.109/A. integerrimus|evm.model.ctg005400_np12.270/A. integerrimus|evm.model.ctg005400_np12.217/A. integerrimus|evm.model.ctg005400_np12.22…	11

## Sheet: mianxie-ref_mianxie-kegg.result
	ID	Description	GeneRatio	BgRatio	pvalue	p.adjust	qvalue	geneID	Count
map00140	map00140	Steroid hormone biosynthesis	173/2838	198/6454	3.41911392930873e-38	1.15566050810635e-35	8.67375217856214e-36	L. dehaani|evm.model.ctg000350_np12.3/L. dehaani|evm.model.ctg010220_np12.142/L. dehaani|evm.model.ctg013340_np12.216/L. dehaani|evm.model.ctg008030_np12.375/L. dehaani|evm.model.ctg017920_np12.46/L. dehaani|evm.model.ctg016290_np12.39/L. dehaani|evm.model.ctg002510_np12.17/L. dehaani|evm.model.ctg016810_np12.104/L. dehaani|evm.model.ctg019030_np12.219/L. dehaani|evm.model.ctg018590_np12.27/L. de…	173
map04080	map04080	Neuroactive ligand-receptor interaction	300/2838	419/6454	2.69459408616365e-32	4.55386400561658e-30	3.41787986718653e-30	L. dehaani|evm.model.ctg015210_np12.11/L. dehaani|evm.model.ctg019680_np12.4/L. dehaani|evm.model.ctg013040_np12.319/L. dehaani|evm.model.ctg004030_np12.14/L. dehaani|evm.model.ctg000270_np12.64/L. dehaani|evm.model.ctg017530_np12.101/L. dehaani|evm.model.ctg007890_np12.78/L. dehaani|evm.model.ctg006570_np12.3/L. dehaani|evm.model.ctg010800_np12.32/L. dehaani|evm.model.ctg007890_np12.25/L. dehaan…	300
map00982	map00982	Drug metabolism - cytochrome P450	137/2838	157/6454	2.99054763457946e-30	3.36935033495953e-28	2.52884905239877e-28	L. dehaani|evm.model.ctg000350_np12.3/L. dehaani|evm.model.ctg010220_np12.142/L. dehaani|evm.model.ctg013340_np12.216/L. dehaani|evm.model.ctg008030_np12.375/L. dehaani|evm.model.ctg017920_np12.46/L. dehaani|evm.model.ctg016290_np12.39/L. dehaani|evm.model.ctg002510_np12.17/L. dehaani|evm.model.ctg016810_np12.104/L. dehaani|evm.model.ctg019030_np12.219/L. dehaani|evm.model.ctg018590_np12.27/L. de…	137
map05204	map05204	Chemical carcinogenesis - DNA adducts	124/2838	147/6454	1.55667881161699e-24	1.31539359581635e-22	9.87262088420248e-23	L. dehaani|evm.model.ctg000350_np12.3/L. dehaani|evm.model.ctg010220_np12.142/L. dehaani|evm.model.ctg013340_np12.216/L. dehaani|evm.model.ctg008030_np12.375/L. dehaani|evm.model.ctg017920_np12.46/L. dehaani|evm.model.ctg016290_np12.39/L. dehaani|evm.model.ctg002510_np12.17/L. dehaani|evm.model.ctg016810_np12.104/L. dehaani|evm.model.ctg019030_np12.219/L. dehaani|evm.model.ctg018590_np12.27/L. de…	124
map00983	map00983	Drug metabolism - other enzymes	162/2838	208/6454	3.81269561370073e-24	2.5773822348617e-22	1.93444135347764e-22	L. dehaani|evm.model.ctg000350_np12.3/L. dehaani|evm.model.ctg010220_np12.142/L. dehaani|evm.model.ctg013340_np12.216/L. dehaani|evm.model.ctg008030_np12.375/L. dehaani|evm.model.ctg017920_np12.46/L. dehaani|evm.model.ctg016290_np12.39/L. dehaani|evm.model.ctg002510_np12.17/L. dehaani|evm.model.ctg016810_np12.104/L. dehaani|evm.model.ctg019030_np12.219/L. dehaani|evm.model.ctg018590_np12.27/L. de…	162
map00980	map00980	Metabolism of xenobiotics by cytochrome P450	121/2838	144/6454	1.17141226495035e-23	6.59895575922033e-22	4.95281326057957e-22	L. dehaani|evm.model.ctg000350_np12.3/L. dehaani|evm.model.ctg010220_np12.142/L. dehaani|evm.model.ctg013340_np12.216/L. dehaani|evm.model.ctg008030_np12.375/L. dehaani|evm.model.ctg017920_np12.46/L. dehaani|evm.model.ctg016290_np12.39/L. dehaani|evm.model.ctg002510_np12.17/L. dehaani|evm.model.ctg016810_np12.104/L. dehaani|evm.model.ctg019030_np12.219/L. dehaani|evm.model.ctg018590_np12.27/L. de…	121
map00830	map00830	Retinol metabolism	115/2838	136/6454	5.1850614359098e-23	2.50364395048216e-21	1.87909745271318e-21	L. dehaani|evm.model.ctg000350_np12.3/L. dehaani|evm.model.ctg010220_np12.142/L. dehaani|evm.model.ctg013340_np12.216/L. dehaani|evm.model.ctg008030_np12.375/L. dehaani|evm.model.ctg017920_np12.46/L. dehaani|evm.model.ctg016290_np12.39/L. dehaani|evm.model.ctg002510_np12.17/L. dehaani|evm.model.ctg016810_np12.104/L. dehaani|evm.model.ctg019030_np12.219/L. dehaani|evm.model.ctg018590_np12.27/L. de…	115
map04977	map04977	Vitamin digestion and absorption	113/2838	138/6454	2.46509061168774e-20	1.04150078343807e-18	7.81693207127298e-19	L. dehaani|evm.model.ctg007030_np12.86/L. dehaani|evm.model.ctg004930_np12.145/L. dehaani|evm.model.ctg004930_np12.140/L. dehaani|evm.model.ctg014290_np12.129/L. dehaani|evm.model.ctg006070_np12.131/L. dehaani|evm.model.ctg012160_np12.135/L. dehaani|evm.model.ctg004930_np12.131/L. dehaani|evm.model.ctg018540_np12.40/L. dehaani|evm.model.ctg018000_np12.194/L. dehaani|evm.model.ctg010090_np12.47/L.…	113
map00533	map00533	Glycosaminoglycan biosynthesis - keratan sulfate	53/2838	54/6454	2.88429830977981e-18	1.08321425411731e-16	8.13001044043199e-17	L. dehaani|evm.model.ctg011490_np12.250/L. dehaani|evm.model.ctg009890_np12.98/L. dehaani|evm.model.ctg012220_np12.657/L. dehaani|evm.model.ctg015590_np12.93/L. dehaani|evm.model.ctg009770_np12.111/L. dehaani|evm.model.ctg008360_np12.279/L. dehaani|evm.model.ctg006900_np12.113/L. dehaani|evm.model.ctg019250_np12.425/L. dehaani|evm.model.ctg002560_np12.17/L. dehaani|evm.model.ctg019660_np12.70/L. …	53
map04974	map04974	Protein digestion and absorption	124/2838	164/6454	7.34792213542666e-17	2.48359768177421e-15	1.86405182593455e-15	L. dehaani|evm.model.ctg004820_np12.14/L. dehaani|evm.model.ctg015350_np12.546/L. dehaani|evm.model.ctg011490_np12.90/L. dehaani|evm.model.ctg005540_np12.84/L. dehaani|evm.model.ctg014760_np12.31/L. dehaani|evm.model.ctg001300_np12.264/L. dehaani|evm.model.ctg009390_np12.14/L. dehaani|evm.model.ctg006220_np12.91/L. dehaani|evm.model.ctg006220_np12.54/L. dehaani|evm.model.ctg016990_np12.55/L. deha…	124
map00601	map00601	Glycosphingolipid biosynthesis - lacto and neolacto series	63/2838	69/6454	9.48959032907133e-17	2.91589230111464e-15	2.18850839168056e-15	L. dehaani|evm.model.ctg016720_np12.89/L. dehaani|evm.model.ctg016160_np12.232/L. dehaani|evm.model.ctg017000_np12.4/L. dehaani|evm.model.ctg016720_np12.260/L. dehaani|evm.model.ctg008170_np12.63/L. dehaani|evm.model.ctg004940_np12.296/L. dehaani|evm.model.ctg008170_np12.70/L. dehaani|evm.model.ctg011710_np12.8/L. dehaani|evm.model.ctg017360_np12.42/L. dehaani|evm.model.ctg016560_np12.33/L. dehaa…	63
map05231	map05231	Choline metabolism in cancer	139/2838	198/6454	3.32871264791253e-14	9.37587395828695e-13	7.03701533462209e-13	L. dehaani|evm.model.ctg010220_np12.142/L. dehaani|evm.model.ctg017920_np12.46/L. dehaani|evm.model.ctg016290_np12.39/L. dehaani|evm.model.ctg000560_np12.546/L. dehaani|evm.model.ctg002510_np12.17/L. dehaani|evm.model.ctg016810_np12.104/L. dehaani|evm.model.ctg009930_np12.258/L. dehaani|evm.model.ctg001050_np12.44/L. dehaani|evm.model.ctg018110_np12.44/L. dehaani|evm.model.ctg000120_np12.129/L. d…	139
map00053	map00053	Ascorbate and aldarate metabolism	81/2838	101/6454	6.27355375668827e-14	1.63112397673895e-12	1.22423194766144e-12	L. dehaani|evm.model.ctg000350_np12.3/L. dehaani|evm.model.ctg010220_np12.142/L. dehaani|evm.model.ctg013340_np12.216/L. dehaani|evm.model.ctg008030_np12.375/L. dehaani|evm.model.ctg017920_np12.46/L. dehaani|evm.model.ctg016290_np12.39/L. dehaani|evm.model.ctg002510_np12.17/L. dehaani|evm.model.ctg016810_np12.104/L. dehaani|evm.model.ctg019030_np12.219/L. dehaani|evm.model.ctg018590_np12.27/L. de…	81
map03320	map03320	PPAR signaling pathway	82/2838	105/6454	6.70772953774684e-13	1.61943755982745e-11	1.2154607658624e-11	L. dehaani|evm.model.ctg015440_np12.102/L. dehaani|evm.model.ctg001840_np12.134/L. dehaani|evm.model.ctg001840_np12.142/L. dehaani|evm.model.ctg007890_np12.30/L. dehaani|evm.model.ctg019250_np12.62/L. dehaani|evm.model.ctg000990_np12.6/L. dehaani|evm.model.ctg006330_np12.69/L. dehaani|evm.model.ctg016160_np12.87/L. dehaani|evm.model.ctg000230_np12.22/L. dehaani|evm.model.ctg016180_np12.142/L. deh…	82
map05033	map05033	Nicotine addiction	62/2838	74/6454	1.41313339297085e-12	3.18426057882764e-11	2.38993086109456e-11	L. dehaani|evm.model.ctg007890_np12.82/L. dehaani|evm.model.ctg001840_np12.137/L. dehaani|evm.model.ctg007810_np12.451/L. dehaani|evm.model.ctg014610_np12.74/L. dehaani|evm.model.ctg007810_np12.464/L. dehaani|evm.model.ctg007810_np12.458/L. dehaani|evm.model.ctg016160_np12.118/L. dehaani|evm.model.ctg003160_np12.44/L. dehaani|evm.model.ctg019790_np12.18/L. dehaani|evm.model.ctg015590_np12.64/L. d…	62
map00071	map00071	Fatty acid degradation	74/2838	94/6454	4.44492405188657e-12	9.38990205961039e-11	7.04754405595174e-11	L. dehaani|evm.model.ctg015440_np12.102/L. dehaani|evm.model.ctg001840_np12.134/L. dehaani|evm.model.ctg001840_np12.142/L. dehaani|evm.model.ctg007890_np12.30/L. dehaani|evm.model.ctg019250_np12.62/L. dehaani|evm.model.ctg000990_np12.6/L. dehaani|evm.model.ctg016160_np12.87/L. dehaani|evm.model.ctg000230_np12.22/L. dehaani|evm.model.ctg016180_np12.142/L. dehaani|evm.model.ctg016180_np12.139/L. de…	74
map04730	map04730	Long-term depression	92/2838	125/6454	1.14950049244912e-11	2.16216247021698e-10	1.62280023457581e-10	L. dehaani|evm.model.ctg007890_np12.78/L. dehaani|evm.model.ctg006570_np12.3/L. dehaani|evm.model.ctg010800_np12.32/L. dehaani|evm.model.ctg007890_np12.25/L. dehaani|evm.model.ctg006570_np12.4/L. dehaani|evm.model.ctg005390_np12.10/L. dehaani|evm.model.ctg006570_np12.32/L. dehaani|evm.model.ctg000440_np12.3/L. dehaani|evm.model.ctg006570_np12.9/L. dehaani|evm.model.ctg009900_np12.41/L. dehaani|ev…	92
map00590	map00590	Arachidonic acid metabolism	74/2838	95/6454	1.15144746934632e-11	2.16216247021698e-10	1.62280023457581e-10	L. dehaani|evm.model.ctg003920_np12.1/L. dehaani|evm.model.ctg005150_np12.49/L. dehaani|evm.model.ctg001770_np12.22/L. dehaani|evm.model.ctg008920_np12.94/L. dehaani|evm.model.ctg000560_np12.15/L. dehaani|evm.model.ctg017570_np12.33/L. dehaani|evm.model.ctg000720_np12.14/L. dehaani|evm.model.ctg011620_np12.58/L. dehaani|evm.model.ctg006470_np12.140/L. dehaani|evm.model.ctg010050_np12.85/L. dehaan…	74
map00591	map00591	Linoleic acid metabolism	56/2838	67/6454	2.15631211142513e-11	3.83596575611418e-10	2.87906492439588e-10	L. dehaani|evm.model.ctg003920_np12.1/L. dehaani|evm.model.ctg005150_np12.49/L. dehaani|evm.model.ctg008920_np12.94/L. dehaani|evm.model.ctg000560_np12.15/L. dehaani|evm.model.ctg017570_np12.33/L. dehaani|evm.model.ctg000720_np12.14/L. dehaani|evm.model.ctg011620_np12.58/L. dehaani|evm.model.ctg006470_np12.140/L. dehaani|evm.model.ctg010050_np12.85/L. dehaani|evm.model.ctg000390_np12.85/L. dehaan…	56
map00330	map00330	Arginine and proline metabolism	83/2838	112/6454	6.57417984575152e-11	1.10789724177112e-09	8.31526737050261e-10	L. dehaani|evm.model.ctg010960_np12.4/L. dehaani|evm.model.ctg007030_np12.86/L. dehaani|evm.model.ctg019680_np12.125/L. dehaani|evm.model.ctg003430_np12.11/L. dehaani|evm.model.ctg003940_np12.21/L. dehaani|evm.model.ctg008810_np12.77/L. dehaani|evm.model.ctg006220_np12.302/L. dehaani|evm.model.ctg014190_np12.472/L. dehaani|evm.model.ctg001950_np12.26/L. dehaani|evm.model.ctg019230_np12.10/L. deha…	83
map00040	map00040	Pentose and glucuronate interconversions	80/2838	107/6454	6.88338522993888e-11	1.10789724177112e-09	8.31526737050261e-10	L. dehaani|evm.model.ctg000350_np12.3/L. dehaani|evm.model.ctg010220_np12.142/L. dehaani|evm.model.ctg013340_np12.216/L. dehaani|evm.model.ctg008030_np12.375/L. dehaani|evm.model.ctg017920_np12.46/L. dehaani|evm.model.ctg016290_np12.39/L. dehaani|evm.model.ctg002510_np12.17/L. dehaani|evm.model.ctg016810_np12.104/L. dehaani|evm.model.ctg019030_np12.219/L. dehaani|evm.model.ctg018590_np12.27/L. de…	80
map04145	map04145	Phagosome	136/2838	207/6454	1.30892882045786e-10	2.0109906423398e-09	1.50933897478633e-09	L. dehaani|evm.model.ctg009650_np12.4/L. dehaani|evm.model.ctg014070_np12.152/L. dehaani|evm.model.ctg004360_np12.140/L. dehaani|evm.model.ctg015350_np12.317/L. dehaani|evm.model.ctg013170_np12.9/L. dehaani|evm.model.ctg012600_np12.4/L. dehaani|evm.model.ctg013120_np12.95/L. dehaani|evm.model.ctg013040_np12.100/L. dehaani|evm.model.ctg018820_np12.27/L. dehaani|evm.model.ctg007480_np12.82/L. dehaa…	136
map00592	map00592	alpha-Linolenic acid metabolism	49/2838	58/6454	1.85697420113707e-10	2.72894469558404e-09	2.04819580079649e-09	L. dehaani|evm.model.ctg015440_np12.102/L. dehaani|evm.model.ctg001840_np12.134/L. dehaani|evm.model.ctg001840_np12.142/L. dehaani|evm.model.ctg007890_np12.30/L. dehaani|evm.model.ctg019250_np12.62/L. dehaani|evm.model.ctg000990_np12.6/L. dehaani|evm.model.ctg016160_np12.87/L. dehaani|evm.model.ctg000230_np12.22/L. dehaani|evm.model.ctg016180_np12.142/L. dehaani|evm.model.ctg016180_np12.139/L. de…	49
map04146	map04146	Peroxisome	125/2838	189/6454	3.92351316664272e-10	5.52561437635516e-09	4.14722225070568e-09	L. dehaani|evm.model.ctg009290_np12.59/L. dehaani|evm.model.ctg011950_np12.39/L. dehaani|evm.model.ctg014600_np12.117/L. dehaani|evm.model.ctg015440_np12.102/L. dehaani|evm.model.ctg001840_np12.134/L. dehaani|evm.model.ctg001840_np12.142/L. dehaani|evm.model.ctg007890_np12.30/L. dehaani|evm.model.ctg019250_np12.62/L. dehaani|evm.model.ctg000990_np12.6/L. dehaani|evm.model.ctg016160_np12.87/L. deh…	125
map00480	map00480	Glutathione metabolism	82/2838	113/6454	5.02421265010086e-10	6.79273550293636e-09	5.09825367862866e-09	L. dehaani|evm.model.ctg019680_np12.125/L. dehaani|evm.model.ctg001790_np12.98/L. dehaani|evm.model.ctg008190_np12.48/L. dehaani|evm.model.ctg007080_np12.436/L. dehaani|evm.model.ctg008420_np12.155/L. dehaani|evm.model.ctg015460_np12.85/L. dehaani|evm.model.ctg015460_np12.45/L. dehaani|evm.model.ctg012550_np12.194/L. dehaani|evm.model.ctg017300_np12.168/L. dehaani|evm.model.ctg015240_np12.38/L. d…	82
map04724	map04724	Glutamatergic synapse	110/2838	163/6454	7.57634985527203e-10	9.84925481185364e-09	7.39230896809943e-09	L. dehaani|evm.model.ctg015210_np12.11/L. dehaani|evm.model.ctg019680_np12.4/L. dehaani|evm.model.ctg013040_np12.319/L. dehaani|evm.model.ctg004030_np12.14/L. dehaani|evm.model.ctg017530_np12.101/L. dehaani|evm.model.ctg007890_np12.82/L. dehaani|evm.model.ctg001840_np12.137/L. dehaani|evm.model.ctg007810_np12.451/L. dehaani|evm.model.ctg011800_np12.129/L. dehaani|evm.model.ctg007940_np12.10/L. de…	110
map00930	map00930	Caprolactam degradation	29/2838	31/6454	6.4257235943826e-09	8.04405398111599e-08	6.03742450778248e-08	L. dehaani|evm.model.ctg012640_np12.258/L. dehaani|evm.model.ctg012640_np12.257/L. dehaani|evm.model.ctg008890_np12.81/L. dehaani|evm.model.ctg004810_np12.31/L. dehaani|evm.model.ctg009770_np12.208/L. dehaani|evm.model.ctg008890_np12.79/L. dehaani|evm.model.ctg008890_np12.78/L. dehaani|evm.model.ctg005460_np12.228/L. dehaani|evm.model.ctg005460_np12.229/L. dehaani|evm.model.ctg000540_np12.60/L. d…	29
map04142	map04142	Lysosome	159/2838	260/6454	9.96622573544169e-09	1.20306582092118e-07	9.02955038436634e-08	L. dehaani|evm.model.ctg009650_np12.4/L. dehaani|evm.model.ctg014070_np12.152/L. dehaani|evm.model.ctg004360_np12.140/L. dehaani|evm.model.ctg015350_np12.317/L. dehaani|evm.model.ctg017150_np12.24/L. dehaani|evm.model.ctg014290_np12.423/L. dehaani|evm.model.ctg010650_np12.7/L. dehaani|evm.model.ctg019790_np12.18/L. dehaani|evm.model.ctg012600_np12.4/L. dehaani|evm.model.ctg005730_np12.492/L. deha…	159
map00860	map00860	Porphyrin metabolism	67/2838	92/6454	1.55856826274215e-08	1.81653818209257e-07	1.36339365270728e-07	L. dehaani|evm.model.ctg000350_np12.3/L. dehaani|evm.model.ctg010220_np12.142/L. dehaani|evm.model.ctg013340_np12.216/L. dehaani|evm.model.ctg008030_np12.375/L. dehaani|evm.model.ctg017920_np12.46/L. dehaani|evm.model.ctg016290_np12.39/L. dehaani|evm.model.ctg002510_np12.17/L. dehaani|evm.model.ctg016810_np12.104/L. dehaani|evm.model.ctg019030_np12.219/L. dehaani|evm.model.ctg018590_np12.27/L. de…	67
map00260	map00260	Glycine, serine and threonine metabolism	68/2838	94/6454	1.91316811525663e-08	2.15550274318913e-07	1.61780180974332e-07	L. dehaani|evm.model.ctg007030_np12.86/L. dehaani|evm.model.ctg003430_np12.11/L. dehaani|evm.model.ctg001460_np12.76/L. dehaani|evm.model.ctg003940_np12.222/L. dehaani|evm.model.ctg003940_np12.134/L. dehaani|evm.model.ctg004230_np12.110/L. dehaani|evm.model.ctg001100_np12.249/L. dehaani|evm.model.ctg001180_np12.27/L. dehaani|evm.model.ctg014290_np12.329/L. dehaani|evm.model.ctg010200_np12.121/L. …	68
map05130	map05130	Pathogenic Escherichia coli infection	65/2838	89/6454	2.12571184898347e-08	2.31771162889165e-07	1.7395468781155e-07	L. dehaani|evm.model.ctg004910_np12.38/L. dehaani|evm.model.ctg004910_np12.57/L. dehaani|evm.model.ctg004910_np12.56/L. dehaani|evm.model.ctg004910_np12.51/L. dehaani|evm.model.ctg004910_np12.55/L. dehaani|evm.model.ctg004910_np12.54/L. dehaani|evm.model.ctg004910_np12.53/L. dehaani|evm.model.ctg004910_np12.52/L. dehaani|evm.model.ctg013860_np12.58/L. dehaani|evm.model.ctg013860_np12.77/L. dehaan…	65
map00232	map00232	Caffeine metabolism	23/2838	24/6454	8.23131125105445e-08	8.69432250892626e-07	6.5254803010004e-07	L. dehaani|evm.model.ctg016690_np12.95/L. dehaani|evm.model.ctg018000_np12.183/L. dehaani|evm.model.ctg018180_np12.2/L. dehaani|evm.model.ctg006070_np12.12/L. dehaani|evm.model.ctg008180_np12.1/L. dehaani|evm.model.ctg006070_np12.184/L. dehaani|evm.model.ctg002600_np12.5/L. dehaani|evm.model.ctg016690_np12.114/L. dehaani|evm.model.ctg014070_np12.97/L. dehaani|evm.model.ctg003430_np12.14/L. dehaan…	23
map01040	map01040	Biosynthesis of unsaturated fatty acids	50/2838	66/6454	1.33372452126661e-07	1.36605723693368e-06	1.02528743102154e-06	L. dehaani|evm.model.ctg015440_np12.102/L. dehaani|evm.model.ctg001840_np12.134/L. dehaani|evm.model.ctg001840_np12.142/L. dehaani|evm.model.ctg007890_np12.30/L. dehaani|evm.model.ctg019250_np12.62/L. dehaani|evm.model.ctg000990_np12.6/L. dehaani|evm.model.ctg016160_np12.87/L. dehaani|evm.model.ctg000230_np12.22/L. dehaani|evm.model.ctg016180_np12.142/L. dehaani|evm.model.ctg016180_np12.139/L. de…	50
map00513	map00513	Various types of N-glycan biosynthesis	74/2838	108/6454	1.82780884862403e-07	1.81705703186741e-06	1.36378307281235e-06	L. dehaani|evm.model.ctg010980_np12.5/L. dehaani|evm.model.ctg017000_np12.12/L. dehaani|evm.model.ctg001520_np12.13/L. dehaani|evm.model.ctg002440_np12.236/L. dehaani|evm.model.ctg016590_np12.456/L. dehaani|evm.model.ctg016720_np12.89/L. dehaani|evm.model.ctg016160_np12.232/L. dehaani|evm.model.ctg017000_np12.4/L. dehaani|evm.model.ctg016720_np12.260/L. dehaani|evm.model.ctg008170_np12.63/L. deha…	74
map01220	map01220	Degradation of aromatic compounds	24/2838	26/6454	2.82818320687474e-07	2.73121692549617e-06	2.04990121159943e-06	L. dehaani|evm.model.ctg012640_np12.258/L. dehaani|evm.model.ctg012640_np12.257/L. dehaani|evm.model.ctg008890_np12.81/L. dehaani|evm.model.ctg004810_np12.31/L. dehaani|evm.model.ctg009770_np12.208/L. dehaani|evm.model.ctg008890_np12.79/L. dehaani|evm.model.ctg008890_np12.78/L. dehaani|evm.model.ctg005460_np12.228/L. dehaani|evm.model.ctg005460_np12.229/L. dehaani|evm.model.ctg000540_np12.60/L. d…	24
map01212	map01212	Fatty acid metabolism	67/2838	97/6454	4.36680625525433e-07	4.09994587298878e-06	3.07719388162659e-06	L. dehaani|evm.model.ctg015440_np12.102/L. dehaani|evm.model.ctg001840_np12.134/L. dehaani|evm.model.ctg001840_np12.142/L. dehaani|evm.model.ctg007890_np12.30/L. dehaani|evm.model.ctg019250_np12.62/L. dehaani|evm.model.ctg000990_np12.6/L. dehaani|evm.model.ctg016160_np12.87/L. dehaani|evm.model.ctg000230_np12.22/L. dehaani|evm.model.ctg016180_np12.142/L. dehaani|evm.model.ctg016180_np12.139/L. de…	67
map00532	map00532	Glycosaminoglycan biosynthesis - chondroitin sulfate / dermatan sulfate	48/2838	65/6454	8.89684633005631e-07	8.12738935015955e-06	6.09997145247104e-06	L. dehaani|evm.model.ctg001300_np12.221/L. dehaani|evm.model.ctg011490_np12.250/L. dehaani|evm.model.ctg009890_np12.98/L. dehaani|evm.model.ctg012220_np12.657/L. dehaani|evm.model.ctg015590_np12.93/L. dehaani|evm.model.ctg008360_np12.279/L. dehaani|evm.model.ctg006900_np12.113/L. dehaani|evm.model.ctg019250_np12.425/L. dehaani|evm.model.ctg015800_np12.42/L. dehaani|evm.model.ctg006400_np12.592/L.…	48
map05410	map05410	Hypertrophic cardiomyopathy	60/2838	87/6454	1.89977583300753e-06	1.68980060935933e-05	1.26827140098286e-05	L. dehaani|evm.model.ctg004910_np12.38/L. dehaani|evm.model.ctg004910_np12.57/L. dehaani|evm.model.ctg004910_np12.56/L. dehaani|evm.model.ctg004910_np12.51/L. dehaani|evm.model.ctg004910_np12.55/L. dehaani|evm.model.ctg004910_np12.54/L. dehaani|evm.model.ctg004910_np12.53/L. dehaani|evm.model.ctg004910_np12.52/L. dehaani|evm.model.ctg013860_np12.58/L. dehaani|evm.model.ctg013860_np12.77/L. dehaan…	60
map04210	map04210	Apoptosis	102/2838	166/6454	3.41004946874761e-06	2.95537620624793e-05	2.21814283932031e-05	L. dehaani|evm.model.ctg009650_np12.4/L. dehaani|evm.model.ctg014070_np12.152/L. dehaani|evm.model.ctg004360_np12.140/L. dehaani|evm.model.ctg015350_np12.317/L. dehaani|evm.model.ctg018330_np12.266/L. dehaani|evm.model.ctg012600_np12.4/L. dehaani|evm.model.ctg007480_np12.82/L. dehaani|evm.model.ctg015350_np12.538/L. dehaani|evm.model.ctg004910_np12.38/L. dehaani|evm.model.ctg004910_np12.57/L. deh…	102
map05134	map05134	Legionellosis	72/2838	110/6454	3.86104284601713e-06	3.26258120488448e-05	2.44871401550034e-05	L. dehaani|evm.model.ctg009650_np12.4/L. dehaani|evm.model.ctg014070_np12.152/L. dehaani|evm.model.ctg004360_np12.140/L. dehaani|evm.model.ctg015350_np12.317/L. dehaani|evm.model.ctg002160_np12.13/L. dehaani|evm.model.ctg010050_np12.273/L. dehaani|evm.model.ctg010050_np12.197/L. dehaani|evm.model.ctg011730_np12.260/L. dehaani|evm.model.ctg011820_np12.333/L. dehaani|evm.model.ctg018780_np12.215/L.…	72
map00310	map00310	Lysine degradation	80/2838	125/6454	4.24510010727275e-06	3.49961911282485e-05	2.62662163248455e-05	L. dehaani|evm.model.ctg019250_np12.325/L. dehaani|evm.model.ctg019440_np12.314/L. dehaani|evm.model.ctg008460_np12.106/L. dehaani|evm.model.ctg007850_np12.9/L. dehaani|evm.model.ctg010410_np12.78/L. dehaani|evm.model.ctg006200_np12.435/L. dehaani|evm.model.ctg003290_np12.94/L. dehaani|evm.model.ctg008770_np12.29/L. dehaani|evm.model.ctg001060_np12.24/L. dehaani|evm.model.ctg004260_np12.108/L. de…	80
map04611	map04611	Platelet activation	98/2838	159/6454	4.36803201456808e-06	3.51522576410479e-05	2.63833512659375e-05	L. dehaani|evm.model.ctg001300_np12.264/L. dehaani|evm.model.ctg015600_np12.187/L. dehaani|evm.model.ctg004910_np12.38/L. dehaani|evm.model.ctg004910_np12.57/L. dehaani|evm.model.ctg004910_np12.56/L. dehaani|evm.model.ctg004910_np12.51/L. dehaani|evm.model.ctg004910_np12.55/L. dehaani|evm.model.ctg004910_np12.54/L. dehaani|evm.model.ctg004910_np12.53/L. dehaani|evm.model.ctg004910_np12.52/L. deha…	98
map05412	map05412	Arrhythmogenic right ventricular cardiomyopathy	47/2838	66/6454	6.29450845000554e-06	4.94777640953924e-05	3.71352885300204e-05	L. dehaani|evm.model.ctg004910_np12.38/L. dehaani|evm.model.ctg004910_np12.57/L. dehaani|evm.model.ctg004910_np12.56/L. dehaani|evm.model.ctg004910_np12.51/L. dehaani|evm.model.ctg004910_np12.55/L. dehaani|evm.model.ctg004910_np12.54/L. dehaani|evm.model.ctg004910_np12.53/L. dehaani|evm.model.ctg004910_np12.52/L. dehaani|evm.model.ctg013860_np12.58/L. dehaani|evm.model.ctg013860_np12.77/L. dehaan…	47
map04913	map04913	Ovarian steroidogenesis	57/2838	84/6454	7.56658017192485e-06	5.81250931388773e-05	4.3625498120428e-05	L. dehaani|evm.model.ctg003920_np12.1/L. dehaani|evm.model.ctg005150_np12.49/L. dehaani|evm.model.ctg008920_np12.94/L. dehaani|evm.model.ctg000560_np12.15/L. dehaani|evm.model.ctg017570_np12.33/L. dehaani|evm.model.ctg000720_np12.14/L. dehaani|evm.model.ctg011620_np12.58/L. dehaani|evm.model.ctg006470_np12.140/L. dehaani|evm.model.ctg010050_np12.85/L. dehaani|evm.model.ctg000390_np12.85/L. dehaan…	57
map01524	map01524	Platinum drug resistance	77/2838	121/6454	8.75803758956174e-06	6.57825934504859e-05	4.93727967037282e-05	L. dehaani|evm.model.ctg009650_np12.4/L. dehaani|evm.model.ctg014070_np12.152/L. dehaani|evm.model.ctg004900_np12.133/L. dehaani|evm.model.ctg004360_np12.140/L. dehaani|evm.model.ctg015350_np12.317/L. dehaani|evm.model.ctg012600_np12.4/L. dehaani|evm.model.ctg007480_np12.82/L. dehaani|evm.model.ctg009760_np12.64/L. dehaani|evm.model.ctg009760_np12.59/L. dehaani|evm.model.ctg008320_np12.27/L. deha…	77
map04610	map04610	Complement and coagulation cascades	42/2838	58/6454	9.96159452764023e-06	7.31960641378782e-05	5.49369400723408e-05	L. dehaani|evm.model.ctg015590_np12.116/L. dehaani|evm.model.ctg000050_np12.19/L. dehaani|evm.model.ctg000050_np12.12/L. dehaani|evm.model.ctg000050_np12.21/L. dehaani|evm.model.ctg012160_np12.215/L. dehaani|evm.model.ctg006220_np12.682/L. dehaani|evm.model.ctg009280_np12.53/L. dehaani|evm.model.ctg006220_np12.43/L. dehaani|evm.model.ctg009280_np12.236/L. dehaani|evm.model.ctg009280_np12.230/L. d…	42
map04512	map04512	ECM-receptor interaction	59/2838	89/6454	1.60545470787025e-05	0.000115456104523435	8.66550021493236e-05	L. dehaani|evm.model.ctg015440_np12.103/L. dehaani|evm.model.ctg013170_np12.9/L. dehaani|evm.model.ctg001300_np12.264/L. dehaani|evm.model.ctg003310_np12.46/L. dehaani|evm.model.ctg017910_np12.17/L. dehaani|evm.model.ctg016590_np12.449/L. dehaani|evm.model.ctg016590_np12.451/L. dehaani|evm.model.ctg016590_np12.452/L. dehaani|evm.model.ctg001300_np12.270/L. dehaani|evm.model.ctg001300_np12.272/L. …	59
map00565	map00565	Ether lipid metabolism	59/2838	90/6454	2.67896024745124e-05	0.000188643450758025	0.000141585399042927	L. dehaani|evm.model.ctg015430_np12.11/L. dehaani|evm.model.ctg014600_np12.5/L. dehaani|evm.model.ctg004340_np12.91/L. dehaani|evm.model.ctg014730_np12.243/L. dehaani|evm.model.ctg013160_np12.4/L. dehaani|evm.model.ctg010990_np12.262/L. dehaani|evm.model.ctg012110_np12.64/L. dehaani|evm.model.ctg005090_np12.112/L. dehaani|evm.model.ctg012110_np12.69/L. dehaani|evm.model.ctg004780_np12.29/L. dehaa…	59
map05322	map05322	Systemic lupus erythematosus	38/2838	53/6454	3.8289476034261e-05	0.000264119242848576	0.000198233377535057	L. dehaani|evm.model.ctg013460_np12.35/L. dehaani|evm.model.ctg005690_np12.56/L. dehaani|evm.model.ctg001050_np12.14/L. dehaani|evm.model.ctg015120_np12.24/L. dehaani|evm.model.ctg002620_np12.6/L. dehaani|evm.model.ctg013680_np12.12/L. dehaani|evm.model.ctg009070_np12.48/L. dehaani|evm.model.ctg013460_np12.32/L. dehaani|evm.model.ctg015350_np12.170/L. dehaani|evm.model.ctg013770_np12.7/L. dehaani…	38
map00730	map00730	Thiamine metabolism	19/2838	22/6454	4.93989599301895e-05	0.000333936969128081	0.000250634723014225	L. dehaani|evm.model.ctg018770_np12.59/L. dehaani|evm.model.ctg018400_np12.14/L. dehaani|evm.model.ctg006100_np12.150/L. dehaani|evm.model.ctg000230_np12.182/L. dehaani|evm.model.ctg011580_np12.25/L. dehaani|evm.model.ctg000230_np12.162/L. dehaani|evm.model.ctg008320_np12.24/L. dehaani|evm.model.ctg001080_np12.315/L. dehaani|evm.model.ctg016990_np12.83/L. dehaani|evm.model.ctg015590_np12.181/L. d…	19
map05132	map05132	Salmonella infection	63/2838	99/6454	5.68923492160071e-05	0.000377051255588439	0.000282993935212749	L. dehaani|evm.model.ctg013170_np12.9/L. dehaani|evm.model.ctg002160_np12.13/L. dehaani|evm.model.ctg010050_np12.273/L. dehaani|evm.model.ctg010050_np12.197/L. dehaani|evm.model.ctg011730_np12.260/L. dehaani|evm.model.ctg011820_np12.333/L. dehaani|evm.model.ctg018780_np12.215/L. dehaani|evm.model.ctg016550_np12.36/L. dehaani|evm.model.ctg015740_np12.14/L. dehaani|evm.model.ctg004900_np12.16/L. de…	63
map04727	map04727	GABAergic synapse	64/2838	101/6454	6.02279733639444e-05	0.000391481826865639	0.000293824728354466	L. dehaani|evm.model.ctg009650_np12.4/L. dehaani|evm.model.ctg014070_np12.152/L. dehaani|evm.model.ctg004360_np12.140/L. dehaani|evm.model.ctg015350_np12.317/L. dehaani|evm.model.ctg003940_np12.8/L. dehaani|evm.model.ctg012600_np12.4/L. dehaani|evm.model.ctg010480_np12.271/L. dehaani|evm.model.ctg015230_np12.10/L. dehaani|evm.model.ctg012640_np12.109/L. dehaani|evm.model.ctg010480_np12.240/L. deh…	64
map05030	map05030	Cocaine addiction	68/2838	110/6454	0.000110683517144853	0.000705868467829441	0.000529786050286189	L. dehaani|evm.model.ctg015210_np12.11/L. dehaani|evm.model.ctg013040_np12.319/L. dehaani|evm.model.ctg004030_np12.14/L. dehaani|evm.model.ctg007030_np12.86/L. dehaani|evm.model.ctg017530_np12.101/L. dehaani|evm.model.ctg007890_np12.82/L. dehaani|evm.model.ctg001840_np12.137/L. dehaani|evm.model.ctg007810_np12.451/L. dehaani|evm.model.ctg014610_np12.74/L. dehaani|evm.model.ctg007810_np12.464/L. d…	68
map04972	map04972	Pancreatic secretion	91/2838	155/6454	0.000134071837772928	0.000839190391986102	0.000629850154059952	L. dehaani|evm.model.ctg004940_np12.74/L. dehaani|evm.model.ctg004520_np12.424/L. dehaani|evm.model.ctg016720_np12.77/L. dehaani|evm.model.ctg012830_np12.222/L. dehaani|evm.model.ctg012040_np12.69/L. dehaani|evm.model.ctg010060_np12.103/L. dehaani|evm.model.ctg019490_np12.8/L. dehaani|evm.model.ctg016580_np12.99/L. dehaani|evm.model.ctg012830_np12.268/L. dehaani|evm.model.ctg004480_np12.24/L. deh…	91
map05418	map05418	Fluid shear stress and atherosclerosis	93/2838	159/6454	0.000137361732782059	0.000843214703312986	0.000632870580811055	L. dehaani|evm.model.ctg004910_np12.38/L. dehaani|evm.model.ctg004910_np12.57/L. dehaani|evm.model.ctg004910_np12.56/L. dehaani|evm.model.ctg004910_np12.51/L. dehaani|evm.model.ctg004910_np12.55/L. dehaani|evm.model.ctg004910_np12.54/L. dehaani|evm.model.ctg004910_np12.53/L. dehaani|evm.model.ctg004910_np12.52/L. dehaani|evm.model.ctg013860_np12.58/L. dehaani|evm.model.ctg013860_np12.77/L. dehaan…	93
map00981	map00981	Insect hormone biosynthesis	38/2838	55/6454	0.000139704211199785	0.000843214703312986	0.000632870580811055	L. dehaani|evm.model.ctg008030_np12.236/L. dehaani|evm.model.ctg007450_np12.431/L. dehaani|evm.model.ctg010220_np12.125/L. dehaani|evm.model.ctg006490_np12.151/L. dehaani|evm.model.ctg007080_np12.464/L. dehaani|evm.model.ctg009280_np12.67/L. dehaani|evm.model.ctg010470_np12.207/L. dehaani|evm.model.ctg010470_np12.210/L. dehaani|evm.model.ctg007190_np12.24/L. dehaani|evm.model.ctg000480_np12.213/L…	38
map00600	map00600	Sphingolipid metabolism	67/2838	109/6454	0.000158565558787301	0.000940265945089611	0.000705711905221415	L. dehaani|evm.model.ctg014290_np12.423/L. dehaani|evm.model.ctg015430_np12.11/L. dehaani|evm.model.ctg014600_np12.5/L. dehaani|evm.model.ctg004340_np12.91/L. dehaani|evm.model.ctg014730_np12.243/L. dehaani|evm.model.ctg013160_np12.4/L. dehaani|evm.model.ctg010990_np12.262/L. dehaani|evm.model.ctg012110_np12.64/L. dehaani|evm.model.ctg005090_np12.112/L. dehaani|evm.model.ctg012110_np12.69/L. deha…	67
map00515	map00515	Mannose type O-glycan biosynthesis	42/2838	63/6454	0.000220334735897291	0.00128401966781525	0.000963714543579804	L. dehaani|evm.model.ctg016160_np12.232/L. dehaani|evm.model.ctg011710_np12.8/L. dehaani|evm.model.ctg009300_np12.31/L. dehaani|evm.model.ctg010230_np12.150/L. dehaani|evm.model.ctg007080_np12.798/L. dehaani|evm.model.ctg014620_np12.450/L. dehaani|evm.model.ctg015770_np12.78/L. dehaani|evm.model.ctg003760_np12.88/L. dehaani|evm.model.ctg015390_np12.75/L. dehaani|evm.model.ctg008640_np12.123/L. de…	42
map00790	map00790	Folate biosynthesis	51/2838	80/6454	0.000267180306125732	0.0015306261605169	0.00114880381402857	L. dehaani|evm.model.ctg009650_np12.4/L. dehaani|evm.model.ctg014070_np12.152/L. dehaani|evm.model.ctg004360_np12.140/L. dehaani|evm.model.ctg015350_np12.317/L. dehaani|evm.model.ctg005150_np12.53/L. dehaani|evm.model.ctg012600_np12.4/L. dehaani|evm.model.ctg007480_np12.82/L. dehaani|evm.model.ctg008340_np12.40/L. dehaani|evm.model.ctg016200_np12.5/L. dehaani|evm.model.ctg013040_np12.404/L. dehaa…	51
map00740	map00740	Riboflavin metabolism	12/2838	13/6454	0.000399058417619366	0.00224802908592243	0.00168724699379416	L. dehaani|evm.model.ctg001090_np12.158/L. dehaani|evm.model.ctg018330_np12.111/L. dehaani|evm.model.ctg011190_np12.10/L. dehaani|evm.model.ctg004670_np12.35/L. dehaani|evm.model.ctg016720_np12.150/L. dehaani|evm.model.ctg002680_np12.41/L. dehaani|evm.model.ctg002760_np12.14/L. dehaani|evm.model.ctg015380_np12.10/L. dehaani|evm.model.ctg002390_np12.20/L. dehaani|evm.model.ctg009080_np12.50/L. deh…	12
map04024	map04024	cAMP signaling pathway	143/2838	265/6454	0.000539463101655188	0.00298915620261399	0.00224349624674547	L. dehaani|evm.model.ctg007060_np12.38/L. dehaani|evm.model.ctg015440_np12.102/L. dehaani|evm.model.ctg001840_np12.134/L. dehaani|evm.model.ctg001840_np12.142/L. dehaani|evm.model.ctg007890_np12.82/L. dehaani|evm.model.ctg001840_np12.137/L. dehaani|evm.model.ctg007890_np12.30/L. dehaani|evm.model.ctg007810_np12.451/L. dehaani|evm.model.ctg019250_np12.62/L. dehaani|evm.model.ctg000990_np12.6/L. de…	143
map05222	map05222	Small cell lung cancer	79/2838	137/6454	0.000780751478427356	0.00421581991430298	0.00316416256414519	L. dehaani|evm.model.ctg009650_np12.4/L. dehaani|evm.model.ctg015440_np12.103/L. dehaani|evm.model.ctg014070_np12.152/L. dehaani|evm.model.ctg004900_np12.133/L. dehaani|evm.model.ctg004360_np12.140/L. dehaani|evm.model.ctg015350_np12.317/L. dehaani|evm.model.ctg013170_np12.9/L. dehaani|evm.model.ctg001300_np12.264/L. dehaani|evm.model.ctg012600_np12.4/L. dehaani|evm.model.ctg003310_np12.46/L. deh…	79
map04216	map04216	Ferroptosis	33/2838	49/6454	0.00078578891893813	0.00421581991430298	0.00316416256414519	L. dehaani|evm.model.ctg010960_np12.4/L. dehaani|evm.model.ctg015840_np12.1/L. dehaani|evm.model.ctg004960_np12.68/L. dehaani|evm.model.ctg002440_np12.243/L. dehaani|evm.model.ctg002310_np12.8/L. dehaani|evm.model.ctg018540_np12.367/L. dehaani|evm.model.ctg013870_np12.226/L. dehaani|evm.model.ctg004330_np12.21/L. dehaani|evm.model.ctg004910_np12.119/L. dehaani|evm.model.ctg004240_np12.161/L. deha…	33
map04976	map04976	Bile secretion	66/2838	112/6454	0.000941832667713203	0.00497405377636036	0.00373325119932372	L. dehaani|evm.model.ctg000480_np12.304/L. dehaani|evm.model.ctg001220_np12.101/L. dehaani|evm.model.ctg000270_np12.94/L. dehaani|evm.model.ctg002610_np12.68/L. dehaani|evm.model.ctg007870_np12.21/L. dehaani|evm.model.ctg004750_np12.42/L. dehaani|evm.model.ctg009760_np12.64/L. dehaani|evm.model.ctg009760_np12.59/L. dehaani|evm.model.ctg008320_np12.27/L. dehaani|evm.model.ctg002750_np12.97/L. deha…	66
map00380	map00380	Tryptophan metabolism	41/2838	65/6454	0.0014227921949899	0.0073985194139475	0.00555292176506181	L. dehaani|evm.model.ctg007030_np12.86/L. dehaani|evm.model.ctg003430_np12.11/L. dehaani|evm.model.ctg012110_np12.40/L. dehaani|evm.model.ctg016690_np12.95/L. dehaani|evm.model.ctg018000_np12.183/L. dehaani|evm.model.ctg018180_np12.2/L. dehaani|evm.model.ctg006070_np12.12/L. dehaani|evm.model.ctg008180_np12.1/L. dehaani|evm.model.ctg006070_np12.184/L. dehaani|evm.model.ctg002600_np12.5/L. dehaani…	41
map00311	map00311	Penicillin and cephalosporin biosynthesis	10/2838	11/6454	0.00177118833171515	0.00880384788411352	0.00660768402389087	L. dehaani|evm.model.ctg008010_np12.3/L. dehaani|evm.model.ctg017620_np12.140/L. dehaani|evm.model.ctg017620_np12.124/L. dehaani|evm.model.ctg017620_np12.50/L. dehaani|evm.model.ctg017620_np12.131/L. dehaani|evm.model.ctg004930_np12.207/L. dehaani|evm.model.ctg014070_np12.40/L. dehaani|evm.model.ctg009940_np12.32/L. dehaani|evm.model.ctg009940_np12.46/L. dehaani|evm.model.ctg009940_np12.45	10
map00472	map00472	map00472	10/2838	11/6454	0.00177118833171515	0.00880384788411352	0.00660768402389087	L. dehaani|evm.model.ctg008010_np12.3/L. dehaani|evm.model.ctg017620_np12.140/L. dehaani|evm.model.ctg017620_np12.124/L. dehaani|evm.model.ctg017620_np12.50/L. dehaani|evm.model.ctg017620_np12.131/L. dehaani|evm.model.ctg004930_np12.207/L. dehaani|evm.model.ctg014070_np12.40/L. dehaani|evm.model.ctg009940_np12.32/L. dehaani|evm.model.ctg009940_np12.46/L. dehaani|evm.model.ctg009940_np12.45	10
map00940	map00940	Phenylpropanoid biosynthesis	10/2838	11/6454	0.00177118833171515	0.00880384788411352	0.00660768402389087	L. dehaani|evm.model.ctg001090_np12.115/L. dehaani|evm.model.ctg003470_np12.59/L. dehaani|evm.model.ctg009890_np12.54/L. dehaani|evm.model.ctg004900_np12.78/L. dehaani|evm.model.ctg007890_np12.170/L. dehaani|evm.model.ctg000710_np12.4/L. dehaani|evm.model.ctg004840_np12.185/L. dehaani|evm.model.ctg003590_np12.61/L. dehaani|evm.model.ctg001080_np12.1/L. dehaani|evm.model.ctg012110_np12.108	10
map00120	map00120	Primary bile acid biosynthesis	15/2838	19/6454	0.00205332710026466	0.0100583269549197	0.00754922702004247	L. dehaani|evm.model.ctg015440_np12.102/L. dehaani|evm.model.ctg013040_np12.572/L. dehaani|evm.model.ctg008360_np12.330/L. dehaani|evm.model.ctg019390_np12.65/L. dehaani|evm.model.ctg011490_np12.921/L. dehaani|evm.model.ctg006610_np12.161/L. dehaani|evm.model.ctg012260_np12.616/L. dehaani|evm.model.ctg019440_np12.506/L. dehaani|evm.model.ctg019440_np12.521/L. dehaani|evm.model.ctg016050_np12.139/…	15
map04510	map04510	Focal adhesion	113/2838	210/6454	0.0022706515268772	0.0109640030869214	0.00822897771394595	L. dehaani|evm.model.ctg015440_np12.103/L. dehaani|evm.model.ctg013170_np12.9/L. dehaani|evm.model.ctg001300_np12.264/L. dehaani|evm.model.ctg006610_np12.143/L. dehaani|evm.model.ctg003310_np12.46/L. dehaani|evm.model.ctg017910_np12.17/L. dehaani|evm.model.ctg008340_np12.40/L. dehaani|evm.model.ctg016200_np12.5/L. dehaani|evm.model.ctg013040_np12.404/L. dehaani|evm.model.ctg010470_np12.162/L. deh…	113
map04621	map04621	NOD-like receptor signaling pathway	80/2838	143/6454	0.00240346808043563	0.0114418621293978	0.00858763242972552	L. dehaani|evm.model.ctg002160_np12.13/L. dehaani|evm.model.ctg014060_np12.101/L. dehaani|evm.model.ctg001220_np12.102/L. dehaani|evm.model.ctg010050_np12.273/L. dehaani|evm.model.ctg016560_np12.10/L. dehaani|evm.model.ctg017300_np12.167/L. dehaani|evm.model.ctg003130_np12.15/L. dehaani|evm.model.ctg018350_np12.129/L. dehaani|evm.model.ctg010050_np12.197/L. dehaani|evm.model.ctg011730_np12.260/L.…	80
map00750	map00750	Vitamin B6 metabolism	11/2838	13/6454	0.00328718514685947	0.0154315080505347	0.0115820412338177	L. dehaani|evm.model.ctg016690_np12.95/L. dehaani|evm.model.ctg018000_np12.183/L. dehaani|evm.model.ctg018180_np12.2/L. dehaani|evm.model.ctg006070_np12.12/L. dehaani|evm.model.ctg008180_np12.1/L. dehaani|evm.model.ctg006070_np12.184/L. dehaani|evm.model.ctg002600_np12.5/L. dehaani|evm.model.ctg016690_np12.114/L. dehaani|evm.model.ctg000230_np12.35/L. dehaani|evm.model.ctg000230_np12.34/L. dehaan…	11
map05414	map05414	Dilated cardiomyopathy	49/2838	83/6454	0.00389654510593746	0.0180415376137926	0.0135409858764373	L. dehaani|evm.model.ctg004910_np12.38/L. dehaani|evm.model.ctg004910_np12.57/L. dehaani|evm.model.ctg004910_np12.56/L. dehaani|evm.model.ctg004910_np12.51/L. dehaani|evm.model.ctg004910_np12.55/L. dehaani|evm.model.ctg004910_np12.54/L. dehaani|evm.model.ctg004910_np12.53/L. dehaani|evm.model.ctg004910_np12.52/L. dehaani|evm.model.ctg013860_np12.58/L. dehaani|evm.model.ctg013860_np12.77/L. dehaan…	49
map00350	map00350	Tyrosine metabolism	34/2838	55/6454	0.00565962508979766	0.0258507200047515	0.0194021286862196	L. dehaani|evm.model.ctg007030_np12.86/L. dehaani|evm.model.ctg003430_np12.11/L. dehaani|evm.model.ctg015920_np12.19/L. dehaani|evm.model.ctg012430_np12.23/L. dehaani|evm.model.ctg010480_np12.452/L. dehaani|evm.model.ctg012390_np12.98/L. dehaani|evm.model.ctg008920_np12.443/L. dehaani|evm.model.ctg009930_np12.188/L. dehaani|evm.model.ctg011820_np12.68/L. dehaani|evm.model.ctg016580_np12.101/L. de…	34
map04919	map04919	Thyroid hormone signaling pathway	83/2838	153/6454	0.00621847489611381	0.0280245935318196	0.0210337185959779	L. dehaani|evm.model.ctg015460_np12.66/L. dehaani|evm.model.ctg004910_np12.38/L. dehaani|evm.model.ctg004910_np12.57/L. dehaani|evm.model.ctg004910_np12.56/L. dehaani|evm.model.ctg004910_np12.51/L. dehaani|evm.model.ctg004910_np12.55/L. dehaani|evm.model.ctg004910_np12.54/L. dehaani|evm.model.ctg004910_np12.53/L. dehaani|evm.model.ctg004910_np12.52/L. dehaani|evm.model.ctg013860_np12.58/L. dehaan…	83
map05323	map05323	Rheumatoid arthritis	41/2838	69/6454	0.00679939824564984	0.0302394290398638	0.0226960523158118	L. dehaani|evm.model.ctg009650_np12.4/L. dehaani|evm.model.ctg014070_np12.152/L. dehaani|evm.model.ctg004360_np12.140/L. dehaani|evm.model.ctg015350_np12.317/L. dehaani|evm.model.ctg012600_np12.4/L. dehaani|evm.model.ctg007480_np12.82/L. dehaani|evm.model.ctg008390_np12.20/L. dehaani|evm.model.ctg013570_np12.161/L. dehaani|evm.model.ctg004220_np12.134/L. dehaani|evm.model.ctg018820_np12.100/L. de…	41
map05131	map05131	Shigellosis	51/2838	89/6454	0.00746457713536282	0.0325269434401741	0.0244129348149547	L. dehaani|evm.model.ctg015350_np12.538/L. dehaani|evm.model.ctg004910_np12.38/L. dehaani|evm.model.ctg004910_np12.57/L. dehaani|evm.model.ctg004910_np12.56/L. dehaani|evm.model.ctg004910_np12.51/L. dehaani|evm.model.ctg004910_np12.55/L. dehaani|evm.model.ctg004910_np12.54/L. dehaani|evm.model.ctg004910_np12.53/L. dehaani|evm.model.ctg004910_np12.52/L. dehaani|evm.model.ctg013860_np12.58/L. dehaa…	51
map05014	map05014	Amyotrophic lateral sclerosis	54/2838	95/6454	0.00750621771696326	0.0325269434401741	0.0244129348149547	L. dehaani|evm.model.ctg009650_np12.4/L. dehaani|evm.model.ctg014070_np12.152/L. dehaani|evm.model.ctg004360_np12.140/L. dehaani|evm.model.ctg015350_np12.317/L. dehaani|evm.model.ctg007890_np12.82/L. dehaani|evm.model.ctg001840_np12.137/L. dehaani|evm.model.ctg007810_np12.451/L. dehaani|evm.model.ctg014610_np12.74/L. dehaani|evm.model.ctg007810_np12.464/L. dehaani|evm.model.ctg007810_np12.458/L. …	54
map04640	map04640	Hematopoietic cell lineage	31/2838	50/6454	0.00761183310567412	0.0325670834141501	0.024443061671785	L. dehaani|evm.model.ctg008190_np12.3/L. dehaani|evm.model.ctg000930_np12.123/L. dehaani|evm.model.ctg006600_np12.307/L. dehaani|evm.model.ctg013290_np12.115/L. dehaani|evm.model.ctg019440_np12.141/L. dehaani|evm.model.ctg011260_np12.26/L. dehaani|evm.model.ctg011260_np12.29/L. dehaani|evm.model.ctg004070_np12.300/L. dehaani|evm.model.ctg010960_np12.36/L. dehaani|evm.model.ctg000640_np12.13/L. de…	31
map04726	map04726	Serotonergic synapse	75/2838	138/6454	0.00850802301925402	0.0359463972563482	0.0269793887847397	L. dehaani|evm.model.ctg007030_np12.86/L. dehaani|evm.model.ctg009120_np12.124/L. dehaani|evm.model.ctg003920_np12.1/L. dehaani|evm.model.ctg010480_np12.271/L. dehaani|evm.model.ctg015230_np12.10/L. dehaani|evm.model.ctg018320_np12.28/L. dehaani|evm.model.ctg018820_np12.248/L. dehaani|evm.model.ctg013570_np12.48/L. dehaani|evm.model.ctg009280_np12.73/L. dehaani|evm.model.ctg003940_np12.67/L. deha…	75
map04217	map04217	Necroptosis	62/2838	112/6454	0.00955156210166615	0.0398571356834958	0.0299145739636328	L. dehaani|evm.model.ctg001300_np12.281/L. dehaani|evm.model.ctg002620_np12.6/L. dehaani|evm.model.ctg013680_np12.12/L. dehaani|evm.model.ctg013460_np12.32/L. dehaani|evm.model.ctg014060_np12.101/L. dehaani|evm.model.ctg016560_np12.10/L. dehaani|evm.model.ctg017300_np12.167/L. dehaani|evm.model.ctg018350_np12.129/L. dehaani|evm.model.ctg000660_np12.18/L. dehaani|evm.model.ctg010050_np12.223/L. de…	62
map04750	map04750	Inflammatory mediator regulation of TRP channels	57/2838	102/6454	0.00982424405579768	0.0404950547665807	0.0303933609428401	L. dehaani|evm.model.ctg003920_np12.1/L. dehaani|evm.model.ctg005150_np12.49/L. dehaani|evm.model.ctg008920_np12.94/L. dehaani|evm.model.ctg000560_np12.15/L. dehaani|evm.model.ctg017570_np12.33/L. dehaani|evm.model.ctg000720_np12.14/L. dehaani|evm.model.ctg011620_np12.58/L. dehaani|evm.model.ctg006470_np12.140/L. dehaani|evm.model.ctg010050_np12.85/L. dehaani|evm.model.ctg000390_np12.85/L. dehaan…	57

## Sheet: xixie-ref_xixie-kegg.result
	ID	Description	GeneRatio	BgRatio	pvalue	p.adjust	qvalue	geneID	Count
map00053	map00053	Ascorbate and aldarate metabolism	60/1524	98/4701	3.14373897724473e-09	9.7770282192311e-07	8.9017451039877e-07	S. planum|evm.model.ctg47306_pilon_pilon.1/S. planum|evm.model.ctg67667_pilon_pilon.1/S. planum|evm.model.ctg44_pilon_pilon.5/S. planum|evm.model.ctg40036_pilon_pilon.1/S. planum|evm.model.ctg89721_pilon_pilon.3/S. planum|evm.model.ctg57985_pilon_pilon.3/S. planum|evm.model.ctg22974_pilon_pilon.2/S. planum|evm.model.ctg9449_pilon_pilon.3/S. planum|evm.model.ctg1176_pilon_pilon.2/S. planum|evm.mod…	60
map00980	map00980	Metabolism of xenobiotics by cytochrome P450	64/1524	116/4701	2.61208012639529e-07	4.06178459654468e-05	3.69815554737018e-05	S. planum|evm.model.ctg47306_pilon_pilon.1/S. planum|evm.model.ctg23_pilon_pilon.9/S. planum|evm.model.ctg67667_pilon_pilon.1/S. planum|evm.model.ctg44_pilon_pilon.5/S. planum|evm.model.ctg40036_pilon_pilon.1/S. planum|evm.model.ctg89721_pilon_pilon.3/S. planum|evm.model.ctg57985_pilon_pilon.3/S. planum|evm.model.ctg22974_pilon_pilon.2/S. planum|evm.model.ctg7351_pilon_pilon.4/S. planum|evm.model…	64
map04972	map04972	Pancreatic secretion	60/1524	108/4701	4.50261284666864e-07	4.66770865104649e-05	4.24983458159251e-05	S. planum|evm.model.ctg47306_pilon_pilon.1/S. planum|evm.model.ctg75615_pilon_pilon.2/S. planum|evm.model.ctg3864_pilon_pilon.4/S. planum|evm.model.ctg18_pilon_pilon.13/S. planum|evm.model.ctg703_pilon_pilon.1/S. planum|evm.model.ctg4822_pilon_pilon.1/S. planum|evm.model.ctg51482_pilon_pilon.1/S. planum|evm.model.ctg24523_pilon_pilon.2/S. planum|evm.model.ctg12023_pilon_pilon.1/S. planum|evm.mode…	60
map05204	map05204	Chemical carcinogenesis - DNA adducts	61/1524	116/4701	4.31866434988141e-06	0.00033577615320328	0.000305715976346868	S. planum|evm.model.ctg47306_pilon_pilon.1/S. planum|evm.model.ctg23_pilon_pilon.9/S. planum|evm.model.ctg67667_pilon_pilon.1/S. planum|evm.model.ctg44_pilon_pilon.5/S. planum|evm.model.ctg40036_pilon_pilon.1/S. planum|evm.model.ctg89721_pilon_pilon.3/S. planum|evm.model.ctg57985_pilon_pilon.3/S. planum|evm.model.ctg22974_pilon_pilon.2/S. planum|evm.model.ctg7351_pilon_pilon.4/S. planum|evm.model…	61
map00860	map00860	Porphyrin metabolism	52/1524	96/4701	7.224600353355e-06	0.000398825088217426	0.000363120489864572	S. planum|evm.model.ctg67667_pilon_pilon.1/S. planum|evm.model.ctg44_pilon_pilon.5/S. planum|evm.model.ctg40036_pilon_pilon.1/S. planum|evm.model.ctg89721_pilon_pilon.3/S. planum|evm.model.ctg57985_pilon_pilon.3/S. planum|evm.model.ctg22974_pilon_pilon.2/S. planum|evm.model.ctg9449_pilon_pilon.3/S. planum|evm.model.ctg1176_pilon_pilon.2/S. planum|evm.model.ctg47891_pilon_pilon.1/S. planum|evm.mod…	52
map00982	map00982	Drug metabolism - cytochrome P450	57/1524	108/4701	7.69437469229761e-06	0.000398825088217426	0.000363120489864572	S. planum|evm.model.ctg47306_pilon_pilon.1/S. planum|evm.model.ctg67667_pilon_pilon.1/S. planum|evm.model.ctg44_pilon_pilon.5/S. planum|evm.model.ctg40036_pilon_pilon.1/S. planum|evm.model.ctg89721_pilon_pilon.3/S. planum|evm.model.ctg57985_pilon_pilon.3/S. planum|evm.model.ctg22974_pilon_pilon.2/S. planum|evm.model.ctg9449_pilon_pilon.3/S. planum|evm.model.ctg1176_pilon_pilon.2/S. planum|evm.mod…	57
map00830	map00830	Retinol metabolism	56/1524	108/4701	1.84210074572545e-05	0.000818419045600878	0.000745150527218264	S. planum|evm.model.ctg23_pilon_pilon.9/S. planum|evm.model.ctg67667_pilon_pilon.1/S. planum|evm.model.ctg44_pilon_pilon.5/S. planum|evm.model.ctg40036_pilon_pilon.1/S. planum|evm.model.ctg89721_pilon_pilon.3/S. planum|evm.model.ctg57985_pilon_pilon.3/S. planum|evm.model.ctg22974_pilon_pilon.2/S. planum|evm.model.ctg7351_pilon_pilon.4/S. planum|evm.model.ctg9449_pilon_pilon.3/S. planum|evm.model.…	56
map00040	map00040	Pentose and glucuronate interconversions	53/1524	102/4701	2.8522138955715e-05	0.00110879815190342	0.00100953360251149	S. planum|evm.model.ctg67667_pilon_pilon.1/S. planum|evm.model.ctg44_pilon_pilon.5/S. planum|evm.model.ctg40036_pilon_pilon.1/S. planum|evm.model.ctg89721_pilon_pilon.3/S. planum|evm.model.ctg57985_pilon_pilon.3/S. planum|evm.model.ctg22974_pilon_pilon.2/S. planum|evm.model.ctg9449_pilon_pilon.3/S. planum|evm.model.ctg1176_pilon_pilon.2/S. planum|evm.model.ctg47891_pilon_pilon.1/S. planum|evm.mod…	53
map00140	map00140	Steroid hormone biosynthesis	61/1524	122/4701	3.37841989997521e-05	0.00115800399736817	0.00105433432151646	S. planum|evm.model.ctg23_pilon_pilon.9/S. planum|evm.model.ctg67667_pilon_pilon.1/S. planum|evm.model.ctg44_pilon_pilon.5/S. planum|evm.model.ctg40036_pilon_pilon.1/S. planum|evm.model.ctg89721_pilon_pilon.3/S. planum|evm.model.ctg57985_pilon_pilon.3/S. planum|evm.model.ctg22974_pilon_pilon.2/S. planum|evm.model.ctg7351_pilon_pilon.4/S. planum|evm.model.ctg9449_pilon_pilon.3/S. planum|evm.model.…	61
map04217	map04217	Necroptosis	46/1524	86/4701	3.72348552208415e-05	0.00115800399736817	0.00105433432151646	S. planum|evm.model.ctg265_pilon_pilon.3/S. planum|evm.model.ctg149331_pilon_pilon.1/S. planum|evm.model.ctg62603_pilon_pilon.1/S. planum|evm.model.ctg6842_pilon_pilon.8/S. planum|evm.model.ctg33695_pilon_pilon.2/S. planum|evm.model.ctg19212_pilon_pilon.2/S. planum|evm.model.ctg201951_pilon_pilon.1/S. planum|evm.model.ctg2729_pilon_pilon.2/S. planum|evm.model.ctg3712_pilon_pilon.2/S. planum|evm.m…	46
map00620	map00620	Pyruvate metabolism	27/1524	45/4701	0.000121398819635391	0.00343227571878242	0.00312500310831772	S. planum|evm.model.ctg47306_pilon_pilon.1/S. planum|evm.model.ctg78035_pilon_pilon.3/S. planum|evm.model.ctg118325_pilon_pilon.1/S. planum|evm.model.ctg22757_pilon_pilon.1/S. planum|evm.model.ctg173438_pilon_pilon.1/S. planum|evm.model.ctg4087_pilon_pilon.3/S. planum|evm.model.ctg37228_pilon_pilon.3/S. planum|evm.model.ctg297177_pilon_pilon.1/S. planum|evm.model.ctg147568_pilon_pilon.1/S. planum…	27
map04973	map04973	Carbohydrate digestion and absorption	23/1524	38/4701	0.000323030825035295	0.00837188221549806	0.00762239402934161	S. planum|evm.model.ctg32941_pilon_pilon.1/S. planum|evm.model.ctg902_pilon_pilon.3/S. planum|evm.model.ctg11926_pilon_pilon.2/S. planum|evm.model.ctg45200_pilon_pilon.1/S. planum|evm.model.ctg29338_pilon_pilon.3/S. planum|evm.model.ctg4131_pilon_pilon.1/S. planum|evm.model.ctg4131_pilon_pilon.6/S. planum|evm.model.ctg107036_pilon_pilon.1/S. planum|evm.model.ctg346004_pilon_pilon.1/S. planum|evm.…	23
map05231	map05231	Choline metabolism in cancer	71/1524	156/4701	0.000354445867036461	0.00847943574217995	0.00772031888524761	S. planum|evm.model.ctg8331_pilon_pilon.10/S. planum|evm.model.ctg67667_pilon_pilon.1/S. planum|evm.model.ctg44_pilon_pilon.5/S. planum|evm.model.ctg40036_pilon_pilon.1/S. planum|evm.model.ctg8977_pilon_pilon.1/S. planum|evm.model.ctg89721_pilon_pilon.3/S. planum|evm.model.ctg57985_pilon_pilon.3/S. planum|evm.model.ctg9449_pilon_pilon.3/S. planum|evm.model.ctg1176_pilon_pilon.2/S. planum|evm.mode…	71
map00010	map00010	Glycolysis / Gluconeogenesis	29/1524	54/4701	0.000927066209118555	0.0205941136454193	0.0187504368611196	S. planum|evm.model.ctg47306_pilon_pilon.1/S. planum|evm.model.ctg16083_pilon_pilon.1/S. planum|evm.model.ctg78035_pilon_pilon.3/S. planum|evm.model.ctg118325_pilon_pilon.1/S. planum|evm.model.ctg22757_pilon_pilon.1/S. planum|evm.model.ctg173438_pilon_pilon.1/S. planum|evm.model.ctg4087_pilon_pilon.3/S. planum|evm.model.ctg37228_pilon_pilon.3/S. planum|evm.model.ctg297177_pilon_pilon.1/S. planum|…	29
map00903	map00903	Limonene degradation	9/1524	11/4701	0.00107906765005083	0.0223726692777206	0.020369768271135	S. planum|evm.model.ctg47306_pilon_pilon.1/S. planum|evm.model.ctg118325_pilon_pilon.1/S. planum|evm.model.ctg22757_pilon_pilon.1/S. planum|evm.model.ctg173438_pilon_pilon.1/S. planum|evm.model.ctg4087_pilon_pilon.3/S. planum|evm.model.ctg37228_pilon_pilon.3/S. planum|evm.model.ctg88235_pilon_pilon.1/S. planum|evm.model.ctg112589_pilon_pilon.1/S. planum|evm.model.ctg178_pilon_pilon.163	9
map03030	map03030	DNA replication	24/1524	43/4701	0.00124236644350074	0.0241484977455457	0.0219866166645855	S. planum|evm.model.ctg2800_pilon_pilon.5/S. planum|evm.model.ctg28163_pilon_pilon.3/S. planum|evm.model.ctg2432_pilon_pilon.1/S. planum|evm.model.ctg174902_pilon_pilon.2/S. planum|evm.model.ctg28869_pilon_pilon.4/S. planum|evm.model.ctg4369_pilon_pilon.5/S. planum|evm.model.ctg39675_pilon_pilon.1/S. planum|evm.model.ctg51043_pilon_pilon.2/S. planum|evm.model.ctg29403_pilon_pilon.1/S. planum|evm.…	24
map04621	map04621	NOD-like receptor signaling pathway	45/1524	95/4701	0.00154515705521297	0.028267284951249	0.0257366716936402	S. planum|evm.model.ctg47306_pilon_pilon.1/S. planum|evm.model.ctg149331_pilon_pilon.1/S. planum|evm.model.ctg62603_pilon_pilon.1/S. planum|evm.model.ctg6842_pilon_pilon.8/S. planum|evm.model.ctg33695_pilon_pilon.2/S. planum|evm.model.ctg19212_pilon_pilon.2/S. planum|evm.model.ctg201951_pilon_pilon.1/S. planum|evm.model.ctg2729_pilon_pilon.2/S. planum|evm.model.ctg3712_pilon_pilon.2/S. planum|evm…	45
map01120	map01120	Microbial metabolism in diverse environments	90/1524	215/4701	0.00184973606499182	0.0306555968963501	0.0279111713153433	S. planum|evm.model.ctg2171_pilon_pilon.6/S. planum|evm.model.ctg47306_pilon_pilon.1/S. planum|evm.model.ctg29450_pilon_pilon.2/S. planum|evm.model.ctg78035_pilon_pilon.3/S. planum|evm.model.ctg13597_pilon_pilon.8/S. planum|evm.model.ctg52279_pilon_pilon.1/S. planum|evm.model.ctg118325_pilon_pilon.1/S. planum|evm.model.ctg22757_pilon_pilon.1/S. planum|evm.model.ctg173438_pilon_pilon.1/S. planum|e…	90
map00410	map00410	beta-Alanine metabolism	21/1524	37/4701	0.00187284997115965	0.0306555968963501	0.0279111713153433	S. planum|evm.model.ctg47306_pilon_pilon.1/S. planum|evm.model.ctg118325_pilon_pilon.1/S. planum|evm.model.ctg22757_pilon_pilon.1/S. planum|evm.model.ctg173438_pilon_pilon.1/S. planum|evm.model.ctg4087_pilon_pilon.3/S. planum|evm.model.ctg37228_pilon_pilon.3/S. planum|evm.model.ctg29808_pilon_pilon.2/S. planum|evm.model.ctg297177_pilon_pilon.1/S. planum|evm.model.ctg147568_pilon_pilon.1/S. planum…	21
map00981	map00981	Insect hormone biosynthesis	20/1524	35/4701	0.0021426070326931	0.0333175393583777	0.0303348048312865	S. planum|evm.model.ctg47306_pilon_pilon.1/S. planum|evm.model.ctg118325_pilon_pilon.1/S. planum|evm.model.ctg22757_pilon_pilon.1/S. planum|evm.model.ctg173438_pilon_pilon.1/S. planum|evm.model.ctg4087_pilon_pilon.3/S. planum|evm.model.ctg37228_pilon_pilon.3/S. planum|evm.model.ctg88235_pilon_pilon.1/S. planum|evm.model.ctg112589_pilon_pilon.1/S. planum|evm.model.ctg251458_pilon_pilon.1/S. planum…	20
map00650	map00650	Butanoate metabolism	18/1524	31/4701	0.00279068004685345	0.0413286425986392	0.0376287184262445	S. planum|evm.model.ctg115863_pilon_pilon.1/S. planum|evm.model.ctg257502_pilon_pilon.1/S. planum|evm.model.ctg437_pilon_pilon.29/S. planum|evm.model.ctg105236_pilon_pilon.2/S. planum|evm.model.ctg18173_pilon_pilon.2/S. planum|evm.model.ctg108157_pilon_pilon.1/S. planum|evm.model.ctg1996_pilon_pilon.6/S. planum|evm.model.ctg33550_pilon_pilon.2/S. planum|evm.model.ctg530675_pilon_pilon.1/S. planum…	18
map04940	map04940	Type I diabetes mellitus	9/1524	12/4701	0.0030721778169913	0.0429284312899509	0.0390852869080954	S. planum|evm.model.ctg1996_pilon_pilon.6/S. planum|evm.model.ctg33550_pilon_pilon.2/S. planum|evm.model.ctg530675_pilon_pilon.1/S. planum|evm.model.ctg9333_pilon_pilon.1/S. planum|evm.model.ctg19834_pilon_pilon.3/S. planum|evm.model.ctg119164_pilon_pilon.1/S. planum|evm.model.ctg2078_pilon_pilon.4/S. planum|evm.model.ctg495857_pilon_pilon.1/S. planum|evm.model.ctg118404_pilon_pilon.1	9
map04614	map04614	Renin-angiotensin system	17/1524	29/4701	0.00317477144588061	0.0429284312899509	0.0390852869080954	S. planum|evm.model.ctg20082_pilon_pilon.1/S. planum|evm.model.ctg151753_pilon_pilon.1/S. planum|evm.model.ctg122044_pilon_pilon.1/S. planum|evm.model.ctg159416_pilon_pilon.1/S. planum|evm.model.ctg363600_pilon_pilon.1/S. planum|evm.model.ctg15055_pilon_pilon.1/S. planum|evm.model.ctg87550_pilon_pilon.1/S. planum|evm.model.ctg87016_pilon_pilon.1/S. planum|evm.model.ctg73141_pilon_pilon.1/S. planu…	17

## Sheet: shizumu-ref_ZhongGuoDuiXia-kegg
	ID	Description	GeneRatio	BgRatio	pvalue	p.adjust	qvalue	geneID	Count
map04080	map04080	Neuroactive ligand-receptor interaction	91/519	387/7452	7.62587227938687e-27	1.55567794499492e-24	1.09170382104907e-24	P. chinensis|gene7618/P. chinensis|gene7298/P. chinensis|gene7293/P. chinensis|gene19210/P. chinensis|gene24622/P. chinensis|gene26287/P. chinensis|gene20068/P. chinensis|gene25966/P. chinensis|gene2474/P. chinensis|gene2475/P. chinensis|gene17174/P. chinensis|gene6930/P. chinensis|gene7730/P. chinensis|gene7733/P. chinensis|gene7729/P. chinensis|gene4462/P. chinensis|gene6175/P. chinensis|gene20…	91
map05016	map05016	Huntington disease	64/519	269/7452	3.30629144452214e-19	3.37241727341259e-17	2.36660861292111e-17	P. chinensis|gene16518/P. chinensis|gene5189/P. chinensis|gene885/P. chinensis|gene16520/P. chinensis|gene15164/P. chinensis|gene18614/P. chinensis|gene23659/P. chinensis|gene18611/P. chinensis|gene2984/P. chinensis|gene23657/P. chinensis|gene2983/P. chinensis|gene20902/P. chinensis|gene18617/P. chinensis|gene25837/P. chinensis|gene2979/P. chinensis|gene18612/P. chinensis|gene2981/P. chinensis|ge…	64
map05033	map05033	Nicotine addiction	27/519	90/7452	3.22851330637238e-11	2.19538904833322e-09	1.54062389356717e-09	P. chinensis|gene7293/P. chinensis|gene19210/P. chinensis|gene24622/P. chinensis|gene26287/P. chinensis|gene25966/P. chinensis|gene2474/P. chinensis|gene2475/P. chinensis|gene6930/P. chinensis|gene7733/P. chinensis|gene11522/P. chinensis|gene25921/P. chinensis|gene14361/P. chinensis|gene16563/P. chinensis|gene23650/P. chinensis|gene16932/P. chinensis|gene4486/P. chinensis|gene12191/P. chinensis|g…	27
map04926	map04926	Relaxin signaling pathway	32/519	136/7452	5.35721190416586e-10	2.18990259777008e-08	1.53677375282111e-08	P. chinensis|gene3510/P. chinensis|gene1140/P. chinensis|gene16283/P. chinensis|gene16278/P. chinensis|gene2279/P. chinensis|gene2286/P. chinensis|gene16279/P. chinensis|gene16281/P. chinensis|gene16293/P. chinensis|gene16292/P. chinensis|gene16287/P. chinensis|gene16294/P. chinensis|gene16284/P. chinensis|gene16280/P. chinensis|gene18955/P. chinensis|gene6264/P. chinensis|gene555/P. chinensis|ge…	32
map00981	map00981	Insect hormone biosynthesis	20/519	57/7452	5.36740832786785e-10	2.18990259777008e-08	1.53677375282111e-08	P. chinensis|gene13515/P. chinensis|gene14275/P. chinensis|gene13191/P. chinensis|gene9786/P. chinensis|gene23085/P. chinensis|gene21281/P. chinensis|gene15112/P. chinensis|gene2724/P. chinensis|gene6650/P. chinensis|gene12512/P. chinensis|gene8333/P. chinensis|gene3853/P. chinensis|gene259/P. chinensis|gene15309/P. chinensis|gene8813/P. chinensis|gene18761/P. chinensis|gene6367/P. chinensis|gene…	20
map05217	map05217	Basal cell carcinoma	19/519	52/7452	6.56832463616784e-10	2.23323037629707e-08	1.56717921143654e-08	P. chinensis|gene22994/P. chinensis|gene9650/P. chinensis|gene21406/P. chinensis|gene26065/P. chinensis|gene9932/P. chinensis|gene18373/P. chinensis|gene16300/P. chinensis|gene16303/P. chinensis|gene11493/P. chinensis|gene20217/P. chinensis|gene1587/P. chinensis|gene19832/P. chinensis|gene9981/P. chinensis|gene17996/P. chinensis|gene20215/P. chinensis|gene20216/P. chinensis|gene9983/P. chinensis|…	19
map05146	map05146	Amoebiasis	33/519	147/7452	1.05711709133355e-09	3.08074123760064e-08	2.16192367550922e-08	P. chinensis|gene13528/P. chinensis|gene7251/P. chinensis|gene13968/P. chinensis|gene16283/P. chinensis|gene16278/P. chinensis|gene2279/P. chinensis|gene2286/P. chinensis|gene16279/P. chinensis|gene16281/P. chinensis|gene16293/P. chinensis|gene16292/P. chinensis|gene16287/P. chinensis|gene16294/P. chinensis|gene16284/P. chinensis|gene16280/P. chinensis|gene18955/P. chinensis|gene6264/P. chinensis…	33
map04610	map04610	Complement and coagulation cascades	22/519	72/7452	1.51002750288036e-09	3.85057013234492e-08	2.70215447883854e-08	P. chinensis|gene7251/P. chinensis|gene25328/P. chinensis|gene10174/P. chinensis|gene9191/P. chinensis|gene10182/P. chinensis|gene21946/P. chinensis|gene26110/P. chinensis|gene10186/P. chinensis|gene14424/P. chinensis|gene7623/P. chinensis|gene6427/P. chinensis|gene24929/P. chinensis|gene6432/P. chinensis|gene10769/P. chinensis|gene6425/P. chinensis|gene10760/P. chinensis|gene6437/P. chinensis|ge…	22
map05205	map05205	Proteoglycans in cancer	47/519	273/7452	4.07921586441886e-09	9.24622262601609e-08	6.4885772814148e-08	P. chinensis|gene13528/P. chinensis|gene15075/P. chinensis|gene1140/P. chinensis|gene5308/P. chinensis|gene1770/P. chinensis|gene1135/P. chinensis|gene1136/P. chinensis|gene9909/P. chinensis|gene18987/P. chinensis|gene4131/P. chinensis|gene14182/P. chinensis|gene17297/P. chinensis|gene17290/P. chinensis|gene14186/P. chinensis|gene20724/P. chinensis|gene20722/P. chinensis|gene17284/P. chinensis|ge…	47
map04974	map04974	Protein digestion and absorption	35/519	176/7452	9.93870606431427e-09	2.02749603712011e-07	1.42280423657552e-07	P. chinensis|gene20607/P. chinensis|gene16593/P. chinensis|gene18127/P. chinensis|gene14427/P. chinensis|gene15900/P. chinensis|gene18113/P. chinensis|gene14425/P. chinensis|gene21544/P. chinensis|gene21629/P. chinensis|gene13342/P. chinensis|gene18126/P. chinensis|gene16005/P. chinensis|gene10979/P. chinensis|gene2422/P. chinensis|gene18110/P. chinensis|gene15899/P. chinensis|gene10984/P. chinen…	35
map00592	map00592	alpha-Linolenic acid metabolism	15/519	38/7452	1.24695097284568e-08	2.31252725873198e-07	1.62282614647858e-07	P. chinensis|gene6131/P. chinensis|gene24462/P. chinensis|gene26279/P. chinensis|gene6461/P. chinensis|gene21222/P. chinensis|gene21224/P. chinensis|gene4989/P. chinensis|gene7498/P. chinensis|gene2919/P. chinensis|gene13739/P. chinensis|gene7515/P. chinensis|gene9836/P. chinensis|gene11442/P. chinensis|gene12440/P. chinensis|gene14675	15
map04611	map04611	Platelet activation	35/519	181/7452	2.11946484610988e-08	3.60309023838679e-07	2.52848437781529e-07	P. chinensis|gene7251/P. chinensis|gene1140/P. chinensis|gene5308/P. chinensis|gene1770/P. chinensis|gene1135/P. chinensis|gene1136/P. chinensis|gene16283/P. chinensis|gene16278/P. chinensis|gene2279/P. chinensis|gene2286/P. chinensis|gene16279/P. chinensis|gene16281/P. chinensis|gene16293/P. chinensis|gene16292/P. chinensis|gene16287/P. chinensis|gene16294/P. chinensis|gene16284/P. chinensis|gen…	35
map00983	map00983	Drug metabolism - other enzymes	32/519	167/7452	1.08408990778995e-07	1.70118723991653e-06	1.19381560695897e-06	P. chinensis|gene13515/P. chinensis|gene6174/P. chinensis|gene14273/P. chinensis|gene14275/P. chinensis|gene2726/P. chinensis|gene263/P. chinensis|gene13191/P. chinensis|gene9786/P. chinensis|gene23085/P. chinensis|gene21281/P. chinensis|gene6180/P. chinensis|gene15112/P. chinensis|gene2724/P. chinensis|gene6650/P. chinensis|gene12512/P. chinensis|gene8333/P. chinensis|gene17406/P. chinensis|gene…	32
map01040	map01040	Biosynthesis of unsaturated fatty acids	15/519	44/7452	1.25195838303506e-07	1.82428221527966e-06	1.28019804581029e-06	P. chinensis|gene6131/P. chinensis|gene24462/P. chinensis|gene26279/P. chinensis|gene6461/P. chinensis|gene21222/P. chinensis|gene21224/P. chinensis|gene4989/P. chinensis|gene7498/P. chinensis|gene2919/P. chinensis|gene13739/P. chinensis|gene7515/P. chinensis|gene9836/P. chinensis|gene11442/P. chinensis|gene12440/P. chinensis|gene14675	15
map05165	map05165	Human papillomavirus infection	48/519	319/7452	2.22008875225676e-07	3.0193207030692e-06	2.11882154601347e-06	P. chinensis|gene13528/P. chinensis|gene7251/P. chinensis|gene1361/P. chinensis|gene13968/P. chinensis|gene8908/P. chinensis|gene506/P. chinensis|gene9909/P. chinensis|gene16283/P. chinensis|gene16278/P. chinensis|gene2279/P. chinensis|gene2286/P. chinensis|gene16279/P. chinensis|gene16281/P. chinensis|gene16293/P. chinensis|gene16292/P. chinensis|gene16287/P. chinensis|gene16294/P. chinensis|gen…	48
map04725	map04725	Cholinergic synapse	27/519	134/7452	3.81179335065403e-07	4.86003652208389e-06	3.41055194532203e-06	P. chinensis|gene13515/P. chinensis|gene6174/P. chinensis|gene14273/P. chinensis|gene14275/P. chinensis|gene2726/P. chinensis|gene263/P. chinensis|gene13191/P. chinensis|gene9786/P. chinensis|gene23085/P. chinensis|gene21281/P. chinensis|gene15112/P. chinensis|gene2724/P. chinensis|gene6650/P. chinensis|gene12512/P. chinensis|gene8333/P. chinensis|gene3853/P. chinensis|gene21154/P. chinensis|gene…	27
map05225	map05225	Hepatocellular carcinoma	30/519	165/7452	8.87067445838785e-07	1.06448093500654e-05	7.47004164916872e-06	P. chinensis|gene1140/P. chinensis|gene5308/P. chinensis|gene1770/P. chinensis|gene1135/P. chinensis|gene1136/P. chinensis|gene22994/P. chinensis|gene9650/P. chinensis|gene21406/P. chinensis|gene26065/P. chinensis|gene9932/P. chinensis|gene18373/P. chinensis|gene16300/P. chinensis|gene16303/P. chinensis|gene11493/P. chinensis|gene20217/P. chinensis|gene1587/P. chinensis|gene19832/P. chinensis|gen…	30
map04745	map04745	Phototransduction - fly	20/519	86/7452	1.20054883984086e-06	1.36062201848631e-05	9.54822469113201e-06	P. chinensis|gene1140/P. chinensis|gene5308/P. chinensis|gene1770/P. chinensis|gene1135/P. chinensis|gene1136/P. chinensis|gene26038/P. chinensis|gene26036/P. chinensis|gene23673/P. chinensis|gene23683/P. chinensis|gene23682/P. chinensis|gene23671/P. chinensis|gene744/P. chinensis|gene23677/P. chinensis|gene23679/P. chinensis|gene22955/P. chinensis|gene22951/P. chinensis|gene22961/P. chinensis|ge…	20
map04390	map04390	Hippo signaling pathway	30/519	169/7452	1.4992728263732e-06	1.60974556094807e-05	1.12964600768286e-05	P. chinensis|gene1140/P. chinensis|gene5308/P. chinensis|gene1770/P. chinensis|gene1135/P. chinensis|gene1136/P. chinensis|gene22994/P. chinensis|gene9650/P. chinensis|gene21406/P. chinensis|gene26065/P. chinensis|gene9932/P. chinensis|gene18373/P. chinensis|gene16300/P. chinensis|gene16303/P. chinensis|gene11493/P. chinensis|gene20217/P. chinensis|gene1587/P. chinensis|gene19832/P. chinensis|gen…	30
map00532	map00532	Glycosaminoglycan biosynthesis - chondroitin sulfate / dermatan sulfate	22/519	104/7452	1.96696457366522e-06	2.00630386513853e-05	1.40793253693932e-05	P. chinensis|gene8639/P. chinensis|gene22062/P. chinensis|gene8633/P. chinensis|gene5185/P. chinensis|gene1706/P. chinensis|gene7929/P. chinensis|gene24250/P. chinensis|gene21151/P. chinensis|gene9787/P. chinensis|gene10485/P. chinensis|gene16500/P. chinensis|gene23065/P. chinensis|gene2545/P. chinensis|gene1752/P. chinensis|gene25387/P. chinensis|gene19861/P. chinensis|gene14095/P. chinensis|gen…	22
map04933	map04933	AGE-RAGE signaling pathway in diabetic complications	21/519	100/7452	3.80522009598974e-06	3.6964995218186e-05	2.59403475215341e-05	P. chinensis|gene13528/P. chinensis|gene16283/P. chinensis|gene16278/P. chinensis|gene2279/P. chinensis|gene2286/P. chinensis|gene16279/P. chinensis|gene16281/P. chinensis|gene16293/P. chinensis|gene16292/P. chinensis|gene16287/P. chinensis|gene16294/P. chinensis|gene16284/P. chinensis|gene16280/P. chinensis|gene18955/P. chinensis|gene6264/P. chinensis|gene555/P. chinensis|gene557/P. chinensis|ge…	21
map04916	map04916	Melanogenesis	19/519	85/7452	4.1744759593796e-06	3.87087770778835e-05	2.71640540897428e-05	P. chinensis|gene22994/P. chinensis|gene9650/P. chinensis|gene21406/P. chinensis|gene26065/P. chinensis|gene9932/P. chinensis|gene18373/P. chinensis|gene16300/P. chinensis|gene16303/P. chinensis|gene11493/P. chinensis|gene20217/P. chinensis|gene1587/P. chinensis|gene19832/P. chinensis|gene9981/P. chinensis|gene17996/P. chinensis|gene20215/P. chinensis|gene20216/P. chinensis|gene9983/P. chinensis|…	19
map04723	map04723	Retrograde endocannabinoid signaling	27/519	153/7452	5.65006269999684e-06	5.0113599599972e-05	3.51674383157698e-05	P. chinensis|gene7293/P. chinensis|gene19210/P. chinensis|gene24622/P. chinensis|gene26287/P. chinensis|gene25966/P. chinensis|gene2474/P. chinensis|gene2475/P. chinensis|gene6930/P. chinensis|gene7733/P. chinensis|gene11522/P. chinensis|gene25921/P. chinensis|gene14361/P. chinensis|gene16563/P. chinensis|gene23650/P. chinensis|gene16932/P. chinensis|gene4486/P. chinensis|gene12191/P. chinensis|g…	27
map05222	map05222	Small cell lung cancer	23/519	125/7452	1.37833009257359e-05	0.000114350586917398	8.0246025906946e-05	P. chinensis|gene13528/P. chinensis|gene3510/P. chinensis|gene13968/P. chinensis|gene16283/P. chinensis|gene16278/P. chinensis|gene2279/P. chinensis|gene2286/P. chinensis|gene16279/P. chinensis|gene16281/P. chinensis|gene16293/P. chinensis|gene16292/P. chinensis|gene16287/P. chinensis|gene16294/P. chinensis|gene16284/P. chinensis|gene16280/P. chinensis|gene18955/P. chinensis|gene6264/P. chinensis…	23
map04730	map04730	Long-term depression	20/519	100/7452	1.40135523183086e-05	0.000114350586917398	8.0246025906946e-05	P. chinensis|gene7298/P. chinensis|gene7293/P. chinensis|gene24622/P. chinensis|gene26287/P. chinensis|gene20068/P. chinensis|gene3887/P. chinensis|gene11443/P. chinensis|gene14361/P. chinensis|gene16563/P. chinensis|gene15784/P. chinensis|gene15806/P. chinensis|gene14461/P. chinensis|gene23650/P. chinensis|gene16427/P. chinensis|gene17211/P. chinensis|gene17209/P. chinensis|gene12930/P. chinensi…	20
map05322	map05322	Systemic lupus erythematosus	13/519	48/7452	1.56492327798375e-05	0.000119272152015156	8.36997558001096e-05	P. chinensis|gene17420/P. chinensis|gene16679/P. chinensis|gene16606/P. chinensis|gene8212/P. chinensis|gene16082/P. chinensis|gene10260/P. chinensis|gene17423/P. chinensis|gene8249/P. chinensis|gene14808/P. chinensis|gene23733/P. chinensis|gene17639/P. chinensis|gene15250/P. chinensis|gene8227	13
map04924	map04924	Renin secretion	23/519	126/7452	1.5786020119653e-05	0.000119272152015156	8.36997558001096e-05	P. chinensis|gene12162/P. chinensis|gene6305/P. chinensis|gene21476/P. chinensis|gene10889/P. chinensis|gene19844/P. chinensis|gene1378/P. chinensis|gene16581/P. chinensis|gene22469/P. chinensis|gene21153/P. chinensis|gene6304/P. chinensis|gene21668/P. chinensis|gene14230/P. chinensis|gene14621/P. chinensis|gene14620/P. chinensis|gene1494/P. chinensis|gene1377/P. chinensis|gene11437/P. chinensis|…	23
map04512	map04512	ECM-receptor interaction	25/519	148/7452	2.73173283308021e-05	0.000195747473820799	0.000137366648295297	P. chinensis|gene13528/P. chinensis|gene7251/P. chinensis|gene13968/P. chinensis|gene8908/P. chinensis|gene506/P. chinensis|gene16283/P. chinensis|gene16278/P. chinensis|gene2279/P. chinensis|gene2286/P. chinensis|gene16279/P. chinensis|gene16281/P. chinensis|gene16293/P. chinensis|gene16292/P. chinensis|gene16287/P. chinensis|gene16294/P. chinensis|gene16284/P. chinensis|gene16280/P. chinensis|g…	25
map04727	map04727	GABAergic synapse	21/519	113/7452	2.7826846768643e-05	0.000195747473820799	0.000137366648295297	P. chinensis|gene12915/P. chinensis|gene25966/P. chinensis|gene2474/P. chinensis|gene2475/P. chinensis|gene6930/P. chinensis|gene7733/P. chinensis|gene11522/P. chinensis|gene25921/P. chinensis|gene16932/P. chinensis|gene4486/P. chinensis|gene12191/P. chinensis|gene21733/P. chinensis|gene16329/P. chinensis|gene22212/P. chinensis|gene22207/P. chinensis|gene14339/P. chinensis|gene24309/P. chinensis|…	21
map05226	map05226	Gastric cancer	23/519	135/7452	4.96435364636022e-05	0.000337576047952495	0.000236895472247365	P. chinensis|gene7251/P. chinensis|gene22994/P. chinensis|gene9650/P. chinensis|gene21406/P. chinensis|gene26065/P. chinensis|gene9932/P. chinensis|gene18373/P. chinensis|gene16300/P. chinensis|gene16303/P. chinensis|gene11493/P. chinensis|gene20217/P. chinensis|gene1587/P. chinensis|gene19832/P. chinensis|gene9981/P. chinensis|gene17996/P. chinensis|gene20215/P. chinensis|gene20216/P. chinensis|…	23
map04510	map04510	Focal adhesion	36/519	263/7452	6.27569195600333e-05	0.000412981019040219	0.000289811241431733	P. chinensis|gene13528/P. chinensis|gene7251/P. chinensis|gene13968/P. chinensis|gene1140/P. chinensis|gene5308/P. chinensis|gene1770/P. chinensis|gene1135/P. chinensis|gene1136/P. chinensis|gene8908/P. chinensis|gene506/P. chinensis|gene9909/P. chinensis|gene16283/P. chinensis|gene16278/P. chinensis|gene2279/P. chinensis|gene2286/P. chinensis|gene16279/P. chinensis|gene16281/P. chinensis|gene162…	36
map00071	map00071	Fatty acid degradation	15/519	71/7452	8.5892133044689e-05	0.000547562348159893	0.000384254279410451	P. chinensis|gene6131/P. chinensis|gene24462/P. chinensis|gene26279/P. chinensis|gene6461/P. chinensis|gene21222/P. chinensis|gene21224/P. chinensis|gene4989/P. chinensis|gene7498/P. chinensis|gene2919/P. chinensis|gene13739/P. chinensis|gene7515/P. chinensis|gene9836/P. chinensis|gene11442/P. chinensis|gene12440/P. chinensis|gene14675	15
map04370	map04370	VEGF signaling pathway	14/519	65/7452	0.000118191888877801	0.000730640767608224	0.000512730363233842	P. chinensis|gene9909/P. chinensis|gene4131/P. chinensis|gene14182/P. chinensis|gene17297/P. chinensis|gene17290/P. chinensis|gene14186/P. chinensis|gene20724/P. chinensis|gene20722/P. chinensis|gene17284/P. chinensis|gene17286/P. chinensis|gene17288/P. chinensis|gene14043/P. chinensis|gene14518/P. chinensis|gene12750	14
map04150	map04150	mTOR signaling pathway	23/519	146/7452	0.000170939514549232	0.00102563708729539	0.000719745324417818	P. chinensis|gene21629/P. chinensis|gene16005/P. chinensis|gene2422/P. chinensis|gene13183/P. chinensis|gene22994/P. chinensis|gene9650/P. chinensis|gene21406/P. chinensis|gene26065/P. chinensis|gene9932/P. chinensis|gene18373/P. chinensis|gene16300/P. chinensis|gene16303/P. chinensis|gene11493/P. chinensis|gene20217/P. chinensis|gene1587/P. chinensis|gene19832/P. chinensis|gene9981/P. chinensis|…	23
map04934	map04934	Cushing syndrome	27/519	186/7452	0.000196732529121411	0.00114666959830765	0.000804680419865019	P. chinensis|gene18234/P. chinensis|gene559/P. chinensis|gene556/P. chinensis|gene17277/P. chinensis|gene551/P. chinensis|gene9532/P. chinensis|gene5307/P. chinensis|gene14195/P. chinensis|gene22994/P. chinensis|gene9650/P. chinensis|gene21406/P. chinensis|gene26065/P. chinensis|gene9932/P. chinensis|gene18373/P. chinensis|gene16300/P. chinensis|gene16303/P. chinensis|gene11493/P. chinensis|gene2…	27
map01212	map01212	Fatty acid metabolism	15/519	77/7452	0.000224549243502782	0.0012551547626788	0.000880810359774594	P. chinensis|gene6131/P. chinensis|gene24462/P. chinensis|gene26279/P. chinensis|gene6461/P. chinensis|gene21222/P. chinensis|gene21224/P. chinensis|gene4989/P. chinensis|gene7498/P. chinensis|gene2919/P. chinensis|gene13739/P. chinensis|gene7515/P. chinensis|gene9836/P. chinensis|gene11442/P. chinensis|gene12440/P. chinensis|gene14675	15
map05032	map05032	Morphine addiction	21/519	130/7452	0.000227650618721154	0.0012551547626788	0.000880810359774594	P. chinensis|gene25966/P. chinensis|gene2474/P. chinensis|gene2475/P. chinensis|gene6930/P. chinensis|gene7733/P. chinensis|gene11522/P. chinensis|gene25921/P. chinensis|gene16932/P. chinensis|gene4486/P. chinensis|gene12191/P. chinensis|gene21733/P. chinensis|gene16329/P. chinensis|gene22212/P. chinensis|gene22207/P. chinensis|gene14339/P. chinensis|gene24309/P. chinensis|gene2529/P. chinensis|g…	21
map05132	map05132	Salmonella infection	17/519	97/7452	0.000332901027131957	0.00178715288249787	0.00125414237368272	P. chinensis|gene13964/P. chinensis|gene13968/P. chinensis|gene13967/P. chinensis|gene1140/P. chinensis|gene5308/P. chinensis|gene1770/P. chinensis|gene1135/P. chinensis|gene1136/P. chinensis|gene15644/P. chinensis|gene22955/P. chinensis|gene22951/P. chinensis|gene22961/P. chinensis|gene22953/P. chinensis|gene22956/P. chinensis|gene1142/P. chinensis|gene9328/P. chinensis|gene14589	17
map01523	map01523	Antifolate resistance	12/519	57/7452	0.000449175628218426	0.00234953405529638	0.00164879582827816	P. chinensis|gene17410/P. chinensis|gene9822/P. chinensis|gene19401/P. chinensis|gene17593/P. chinensis|gene25985/P. chinensis|gene4567/P. chinensis|gene19410/P. chinensis|gene9823/P. chinensis|gene4569/P. chinensis|gene4573/P. chinensis|gene996/P. chinensis|gene21902	12
map04310	map04310	Wnt signaling pathway	19/519	124/7452	0.000875692538086437	0.00446603194424083	0.00313405750473041	P. chinensis|gene22994/P. chinensis|gene9650/P. chinensis|gene21406/P. chinensis|gene26065/P. chinensis|gene9932/P. chinensis|gene18373/P. chinensis|gene16300/P. chinensis|gene16303/P. chinensis|gene11493/P. chinensis|gene20217/P. chinensis|gene1587/P. chinensis|gene19832/P. chinensis|gene9981/P. chinensis|gene17996/P. chinensis|gene20215/P. chinensis|gene20216/P. chinensis|gene9983/P. chinensis|…	19
map05224	map05224	Breast cancer	20/519	135/7452	0.00099899586546355	0.00497061357450157	0.0034881498768432	P. chinensis|gene1361/P. chinensis|gene22994/P. chinensis|gene9650/P. chinensis|gene21406/P. chinensis|gene26065/P. chinensis|gene9932/P. chinensis|gene18373/P. chinensis|gene16300/P. chinensis|gene16303/P. chinensis|gene11493/P. chinensis|gene20217/P. chinensis|gene1587/P. chinensis|gene19832/P. chinensis|gene9981/P. chinensis|gene17996/P. chinensis|gene20215/P. chinensis|gene20216/P. chinensis|…	20
map03320	map03320	PPAR signaling pathway	15/519	91/7452	0.00141297669275792	0.00686302965053846	0.0048161611582726	P. chinensis|gene6131/P. chinensis|gene24462/P. chinensis|gene26279/P. chinensis|gene6461/P. chinensis|gene21222/P. chinensis|gene21224/P. chinensis|gene4989/P. chinensis|gene7498/P. chinensis|gene2919/P. chinensis|gene13739/P. chinensis|gene7515/P. chinensis|gene9836/P. chinensis|gene11442/P. chinensis|gene12440/P. chinensis|gene14675	15
map04145	map04145	Phagosome	28/519	223/7452	0.00160445711482441	0.00761184305637626	0.0053416442500886	P. chinensis|gene24516/P. chinensis|gene25328/P. chinensis|gene13964/P. chinensis|gene13968/P. chinensis|gene13967/P. chinensis|gene1140/P. chinensis|gene5308/P. chinensis|gene1770/P. chinensis|gene1135/P. chinensis|gene1136/P. chinensis|gene21121/P. chinensis|gene15544/P. chinensis|gene7126/P. chinensis|gene7125/P. chinensis|gene13527/P. chinensis|gene24701/P. chinensis|gene24227/P. chinensis|ge…	28
map04726	map04726	Serotonergic synapse	20/519	143/7452	0.00204568846425678	0.0094845556070087	0.00665582849614646	P. chinensis|gene25966/P. chinensis|gene2474/P. chinensis|gene2475/P. chinensis|gene6930/P. chinensis|gene7733/P. chinensis|gene11522/P. chinensis|gene25921/P. chinensis|gene15345/P. chinensis|gene16329/P. chinensis|gene22212/P. chinensis|gene22207/P. chinensis|gene14339/P. chinensis|gene24309/P. chinensis|gene2529/P. chinensis|gene21455/P. chinensis|gene10039/P. chinensis|gene6581/P. chinensis|g…	20
map04972	map04972	Pancreatic secretion	24/519	185/7452	0.0021858439678221	0.0099091593207935	0.00695379601459193	P. chinensis|gene15111/P. chinensis|gene12162/P. chinensis|gene6305/P. chinensis|gene21476/P. chinensis|gene10889/P. chinensis|gene19844/P. chinensis|gene1378/P. chinensis|gene16581/P. chinensis|gene22469/P. chinensis|gene21153/P. chinensis|gene6304/P. chinensis|gene21668/P. chinensis|gene14230/P. chinensis|gene14621/P. chinensis|gene14620/P. chinensis|gene1494/P. chinensis|gene1377/P. chinensis|…	24
map05164	map05164	Influenza A	21/519	159/7452	0.00325217166742813	0.014422674351203	0.0101211749833003	P. chinensis|gene3510/P. chinensis|gene1140/P. chinensis|gene5308/P. chinensis|gene1770/P. chinensis|gene1135/P. chinensis|gene1136/P. chinensis|gene14043/P. chinensis|gene14518/P. chinensis|gene12750/P. chinensis|gene22955/P. chinensis|gene22951/P. chinensis|gene22961/P. chinensis|gene22953/P. chinensis|gene22956/P. chinensis|gene1142/P. chinensis|gene14978/P. chinensis|gene6008/P. chinensis|gen…	21
map05169	map05169	Epstein-Barr virus infection	26/519	213/7452	0.00344393859550645	0.0149481590102833	0.0104899361475672	P. chinensis|gene3510/P. chinensis|gene22376/P. chinensis|gene18069/P. chinensis|gene22369/P. chinensis|gene22367/P. chinensis|gene18073/P. chinensis|gene22375/P. chinensis|gene22373/P. chinensis|gene18075/P. chinensis|gene4131/P. chinensis|gene14182/P. chinensis|gene17297/P. chinensis|gene17290/P. chinensis|gene14186/P. chinensis|gene20724/P. chinensis|gene20722/P. chinensis|gene17284/P. chinens…	26
map04215	map04215	Apoptosis - multiple species	10/519	54/7452	0.00363049235920871	0.015429592526637	0.010827784229219	P. chinensis|gene6412/P. chinensis|gene14043/P. chinensis|gene14518/P. chinensis|gene18605/P. chinensis|gene8486/P. chinensis|gene19651/P. chinensis|gene14256/P. chinensis|gene12750/P. chinensis|gene15617/P. chinensis|gene2714	10
map04724	map04724	Glutamatergic synapse	19/519	141/7452	0.00400118794209789	0.0166580069426116	0.0116898294334117	P. chinensis|gene7618/P. chinensis|gene7293/P. chinensis|gene19210/P. chinensis|gene24622/P. chinensis|gene26287/P. chinensis|gene12915/P. chinensis|gene18284/P. chinensis|gene24523/P. chinensis|gene14361/P. chinensis|gene16563/P. chinensis|gene12523/P. chinensis|gene2619/P. chinensis|gene1717/P. chinensis|gene23650/P. chinensis|gene7772/P. chinensis|gene7778/P. chinensis|gene17214/P. chinensis|g…	19
map05416	map05416	Viral myocarditis	15/519	103/7452	0.0048651255018698	0.0198497120476288	0.0139296224895641	P. chinensis|gene3218/P. chinensis|gene1140/P. chinensis|gene5308/P. chinensis|gene1770/P. chinensis|gene1135/P. chinensis|gene1136/P. chinensis|gene14043/P. chinensis|gene14518/P. chinensis|gene12750/P. chinensis|gene22955/P. chinensis|gene22951/P. chinensis|gene22961/P. chinensis|gene22953/P. chinensis|gene22956/P. chinensis|gene1142	15
map03020	map03020	RNA polymerase	11/519	66/7452	0.00542869271653109	0.0217147708661244	0.0152384356955259	P. chinensis|gene22376/P. chinensis|gene18069/P. chinensis|gene22369/P. chinensis|gene22367/P. chinensis|gene18073/P. chinensis|gene22375/P. chinensis|gene22373/P. chinensis|gene18075/P. chinensis|gene15729/P. chinensis|gene5569/P. chinensis|gene12319	11
map04217	map04217	Necroptosis	16/519	116/7452	0.0063318785547996	0.02484044663806	0.017431892377586	P. chinensis|gene14043/P. chinensis|gene14518/P. chinensis|gene12750/P. chinensis|gene17420/P. chinensis|gene16679/P. chinensis|gene16606/P. chinensis|gene8212/P. chinensis|gene16082/P. chinensis|gene10260/P. chinensis|gene17423/P. chinensis|gene14978/P. chinensis|gene6008/P. chinensis|gene7462/P. chinensis|gene14981/P. chinensis|gene15976/P. chinensis|gene11747	16
map05231	map05231	Choline metabolism in cancer	20/519	160/7452	0.00747820865918627	0.0287840484240377	0.0201993322273949	P. chinensis|gene23826/P. chinensis|gene25731/P. chinensis|gene12666/P. chinensis|gene20366/P. chinensis|gene20363/P. chinensis|gene24380/P. chinensis|gene23825/P. chinensis|gene10446/P. chinensis|gene24377/P. chinensis|gene25199/P. chinensis|gene25732/P. chinensis|gene8033/P. chinensis|gene7935/P. chinensis|gene7933/P. chinensis|gene10296/P. chinensis|gene7939/P. chinensis|gene3537/P. chinensis|…	20
map04919	map04919	Thyroid hormone signaling pathway	20/519	162/7452	0.00855709374890206	0.0323267986069633	0.0226854727066409	P. chinensis|gene1361/P. chinensis|gene1140/P. chinensis|gene5308/P. chinensis|gene1770/P. chinensis|gene1135/P. chinensis|gene1136/P. chinensis|gene21406/P. chinensis|gene16300/P. chinensis|gene16303/P. chinensis|gene17996/P. chinensis|gene12341/P. chinensis|gene14043/P. chinensis|gene14518/P. chinensis|gene12750/P. chinensis|gene22955/P. chinensis|gene22951/P. chinensis|gene22961/P. chinensis|g…	20
map04550	map04550	Signaling pathways regulating pluripotency of stem cells	19/519	153/7452	0.00963513866616371	0.0357376052344981	0.0250790212171917	P. chinensis|gene22994/P. chinensis|gene9650/P. chinensis|gene21406/P. chinensis|gene26065/P. chinensis|gene9932/P. chinensis|gene18373/P. chinensis|gene16300/P. chinensis|gene16303/P. chinensis|gene11493/P. chinensis|gene20217/P. chinensis|gene1587/P. chinensis|gene19832/P. chinensis|gene9981/P. chinensis|gene17996/P. chinensis|gene20215/P. chinensis|gene20216/P. chinensis|gene9983/P. chinensis|…	19
map05110	map05110	Vibrio cholerae infection	11/519	72/7452	0.010484292682356	0.037522731705274	0.0263317415475607	P. chinensis|gene1140/P. chinensis|gene5308/P. chinensis|gene1770/P. chinensis|gene1135/P. chinensis|gene1136/P. chinensis|gene22955/P. chinensis|gene22951/P. chinensis|gene22961/P. chinensis|gene22953/P. chinensis|gene22956/P. chinensis|gene1142	11
map05412	map05412	Arrhythmogenic right ventricular cardiomyopathy	11/519	72/7452	0.010484292682356	0.037522731705274	0.0263317415475607	P. chinensis|gene1140/P. chinensis|gene5308/P. chinensis|gene1770/P. chinensis|gene1135/P. chinensis|gene1136/P. chinensis|gene22955/P. chinensis|gene22951/P. chinensis|gene22961/P. chinensis|gene22953/P. chinensis|gene22956/P. chinensis|gene1142	11
map04210	map04210	Apoptosis	18/519	145/7452	0.011607404413227	0.0408260431085915	0.0286498548130466	P. chinensis|gene3510/P. chinensis|gene1140/P. chinensis|gene5308/P. chinensis|gene1770/P. chinensis|gene1135/P. chinensis|gene1136/P. chinensis|gene14043/P. chinensis|gene14518/P. chinensis|gene25440/P. chinensis|gene16247/P. chinensis|gene19654/P. chinensis|gene12750/P. chinensis|gene22955/P. chinensis|gene22951/P. chinensis|gene22961/P. chinensis|gene22953/P. chinensis|gene22956/P. chinensis|g…	18
map05200	map05200	Pathways in cancer	44/519	452/7452	0.0137216621589104	0.0474443911935208	0.0332943096094883	P. chinensis|gene13528/P. chinensis|gene3510/P. chinensis|gene1361/P. chinensis|gene13968/P. chinensis|gene9909/P. chinensis|gene16283/P. chinensis|gene16278/P. chinensis|gene2279/P. chinensis|gene2286/P. chinensis|gene16279/P. chinensis|gene16281/P. chinensis|gene16293/P. chinensis|gene16292/P. chinensis|gene16287/P. chinensis|gene16294/P. chinensis|gene16284/P. chinensis|gene16280/P. chinensis|…	44

## Sheet: yiwei-ref_jijuxie-kegg.result
	ID	Description	GeneRatio	BgRatio	pvalue	p.adjust	qvalue	geneID	Count
map04730	map04730	Long-term depression	114/1211	187/6443	2.42152627725445e-38	7.33722462008098e-36	5.68421431397623e-36	C. brevimanus|evm.model.jjx.Chr40.4066/C. brevimanus|evm.model.jjx.Chr40.4541/C. brevimanus|evm.model.jjx.Chr4.1787/C. brevimanus|evm.model.jjx.Chr39.788/C. brevimanus|evm.model.jjx.Chr40.3925/C. brevimanus|evm.model.jjx.Chr40.4425/C. brevimanus|evm.model.jjx.Chr40.3857/C. brevimanus|evm.model.jjx.Chr33.1648/C. brevimanus|evm.model.jjx.Chr40.210/C. brevimanus|evm.model.jjx.Chr40.3911/C. brevimanu…	114
map04724	map04724	Glutamatergic synapse	122/1211	221/6443	6.52915685011979e-35	9.89167262793149e-33	7.66316830303534e-33	C. brevimanus|evm.model.jjx.Chr40.3093/C. brevimanus|evm.model.jjx.Chr16.554/C. brevimanus|evm.model.jjx.Chr58.63/C. brevimanus|evm.model.jjx.Chr30.2194/C. brevimanus|evm.model.jjx.Chr83.965/C. brevimanus|evm.model.jjx.Chr40.504/C. brevimanus|evm.model.jjx.Chr15.2580/C. brevimanus|evm.model.jjx.Chr30.2457/C. brevimanus|evm.model.jjx.Chr40.3433/C. brevimanus|evm.model.jjx.Chr40.190/C. brevimanus|e…	122
map00140	map00140	Steroid hormone biosynthesis	105/1211	202/6443	3.67480308952832e-27	3.71155112042361e-25	2.87537224198181e-25	C. brevimanus|evm.model.jjx.Chr23.3317/C. brevimanus|evm.model.jjx.Chr97.664/C. brevimanus|evm.model.jjx.Chr93.1312/C. brevimanus|evm.model.jjx.Chr23.3405/C. brevimanus|evm.model.jjx.Chr23.3321/C. brevimanus|evm.model.jjx.Chr52.270/C. brevimanus|evm.model.jjx.Chr52.265/C. brevimanus|evm.model.jjx.Chr52.269/C. brevimanus|evm.model.jjx.Chr51.1523/C. brevimanus|evm.model.jjx.Chr52.1469/C. brevimanus…	105
map05030	map05030	Cocaine addiction	86/1211	163/6443	5.82759218498472e-23	4.41440108012592e-21	3.41987646645156e-21	C. brevimanus|evm.model.jjx.Chr30.2194/C. brevimanus|evm.model.jjx.Chr48.1281/C. brevimanus|evm.model.jjx.Chr65.210/C. brevimanus|evm.model.jjx.Chr26.2357/C. brevimanus|evm.model.jjx.Chr29.43/C. brevimanus|evm.model.jjx.HiC_scaffold_2595.1/C. brevimanus|evm.model.jjx.Chr108.16/C. brevimanus|evm.model.jjx.HiC_scaffold_2599.7/C. brevimanus|evm.model.jjx.Chr51.1725/C. brevimanus|evm.model.jjx.HiC_sc…	86
map05033	map05033	Nicotine addiction	72/1211	127/6443	8.1147778513326e-22	4.91755537790755e-20	3.80967465441509e-20	C. brevimanus|evm.model.jjx.Chr30.2194/C. brevimanus|evm.model.jjx.Chr32.803/C. brevimanus|evm.model.jjx.Chr32.790/C. brevimanus|evm.model.jjx.Chr24.49/C. brevimanus|evm.model.jjx.Chr84.2364/C. brevimanus|evm.model.jjx.Chr57.2902/C. brevimanus|evm.model.jjx.Chr87.171/C. brevimanus|evm.model.jjx.Chr86.2258/C. brevimanus|evm.model.jjx.Chr60.2552/C. brevimanus|evm.model.jjx.Chr65.210/C. brevimanus|e…	72
map00983	map00983	Drug metabolism - other enzymes	100/1211	221/6443	4.40575766683565e-20	2.224907621752e-18	1.72365606965675e-18	C. brevimanus|evm.model.jjx.Chr54.1891/C. brevimanus|evm.model.jjx.Chr30.1667/C. brevimanus|evm.model.jjx.Chr42.249/C. brevimanus|evm.model.jjx.Chr30.1490/C. brevimanus|evm.model.jjx.Chr54.2025/C. brevimanus|evm.model.jjx.Chr57.2894/C. brevimanus|evm.model.jjx.Chr42.261/C. brevimanus|evm.model.jjx.Chr47.141/C. brevimanus|evm.model.jjx.Chr27.1141/C. brevimanus|evm.model.jjx.Chr47.475/C. brevimanus…	100
map00590	map00590	Arachidonic acid metabolism	69/1211	129/6443	4.71382656480691e-19	1.92114026102601e-17	1.48832474625256e-17	C. brevimanus|evm.model.jjx.Chr79.2027/C. brevimanus|evm.model.jjx.Chr98.465/C. brevimanus|evm.model.jjx.Chr98.466/C. brevimanus|evm.model.jjx.Chr89.1331/C. brevimanus|evm.model.jjx.Chr18.1862/C. brevimanus|evm.model.jjx.Chr35.992/C. brevimanus|evm.model.jjx.Chr35.1214/C. brevimanus|evm.model.jjx.Chr41.339/C. brevimanus|evm.model.jjx.Chr18.1630/C. brevimanus|evm.model.jjx.Chr18.1923/C. brevimanus…	69
map04720	map04720	Long-term potentiation	74/1211	144/6443	5.07231752086075e-19	1.92114026102601e-17	1.48832474625256e-17	C. brevimanus|evm.model.jjx.Chr65.210/C. brevimanus|evm.model.jjx.Chr26.2357/C. brevimanus|evm.model.jjx.Chr29.43/C. brevimanus|evm.model.jjx.HiC_scaffold_2595.1/C. brevimanus|evm.model.jjx.Chr108.16/C. brevimanus|evm.model.jjx.HiC_scaffold_2599.7/C. brevimanus|evm.model.jjx.Chr59.1415/C. brevimanus|evm.model.jjx.Chr59.43/C. brevimanus|evm.model.jjx.Chr51.1725/C. brevimanus|evm.model.jjx.HiC_scaf…	74
map00591	map00591	Linoleic acid metabolism	60/1211	105/6443	1.34782311362413e-18	4.53767114920122e-17	3.51537490454012e-17	C. brevimanus|evm.model.jjx.Chr79.2027/C. brevimanus|evm.model.jjx.Chr98.465/C. brevimanus|evm.model.jjx.Chr98.466/C. brevimanus|evm.model.jjx.Chr89.1331/C. brevimanus|evm.model.jjx.Chr18.1862/C. brevimanus|evm.model.jjx.Chr35.992/C. brevimanus|evm.model.jjx.Chr35.1214/C. brevimanus|evm.model.jjx.Chr41.339/C. brevimanus|evm.model.jjx.Chr18.1630/C. brevimanus|evm.model.jjx.Chr18.1923/C. brevimanus…	60
map05014	map05014	Amyotrophic lateral sclerosis	61/1211	116/6443	1.66431149839128e-16	5.04286384012559e-15	3.90675225411849e-15	C. brevimanus|evm.model.jjx.Chr65.210/C. brevimanus|evm.model.jjx.Chr26.2357/C. brevimanus|evm.model.jjx.Chr90.1288/C. brevimanus|evm.model.jjx.Chr110.696/C. brevimanus|evm.model.jjx.Chr1.379/C. brevimanus|evm.model.jjx.Chr1.2301/C. brevimanus|evm.model.jjx.Chr1.2114/C. brevimanus|evm.model.jjx.Chr1.631/C. brevimanus|evm.model.jjx.Chr1.619/C. brevimanus|evm.model.jjx.Chr1.1678/C. brevimanus|evm.m…	61
map04713	map04713	Circadian entrainment	76/1211	163/6443	2.13303844518617e-16	5.87555135355828e-15	4.55184280647385e-15	C. brevimanus|evm.model.jjx.Chr32.803/C. brevimanus|evm.model.jjx.Chr32.790/C. brevimanus|evm.model.jjx.Chr65.210/C. brevimanus|evm.model.jjx.Chr26.2357/C. brevimanus|evm.model.jjx.Chr29.43/C. brevimanus|evm.model.jjx.Chr69.1178/C. brevimanus|evm.model.jjx.Chr71.2916/C. brevimanus|evm.model.jjx.HiC_scaffold_2595.1/C. brevimanus|evm.model.jjx.Chr108.16/C. brevimanus|evm.model.jjx.HiC_scaffold_2599…	76
map05031	map05031	Amphetamine addiction	75/1211	162/6443	5.52400561070049e-16	1.39481141670187e-14	1.08057302735632e-14	C. brevimanus|evm.model.jjx.Chr30.2194/C. brevimanus|evm.model.jjx.Chr32.803/C. brevimanus|evm.model.jjx.Chr32.790/C. brevimanus|evm.model.jjx.Chr48.1281/C. brevimanus|evm.model.jjx.Chr65.210/C. brevimanus|evm.model.jjx.Chr26.2357/C. brevimanus|evm.model.jjx.Chr29.43/C. brevimanus|evm.model.jjx.HiC_scaffold_2595.1/C. brevimanus|evm.model.jjx.Chr108.16/C. brevimanus|evm.model.jjx.HiC_scaffold_2599…	75
map04024	map04024	cAMP signaling pathway	119/1211	319/6443	1.25302544151759e-15	2.92051314446023e-14	2.2625479632261e-14	C. brevimanus|evm.model.jjx.Chr40.4257/C. brevimanus|evm.model.jjx.Chr94.781/C. brevimanus|evm.model.jjx.Chr40.208/C. brevimanus|evm.model.jjx.Chr45.1951/C. brevimanus|evm.model.jjx.Chr30.2194/C. brevimanus|evm.model.jjx.Chr108.89/C. brevimanus|evm.model.jjx.Chr111.72/C. brevimanus|evm.model.jjx.Chr109.244/C. brevimanus|evm.model.jjx.Chr32.803/C. brevimanus|evm.model.jjx.Chr109.786/C. brevimanus|…	119
map00592	map00592	alpha-Linolenic acid metabolism	39/1211	60/6443	3.79521611679543e-15	8.21393202420725e-14	6.36340747402541e-14	C. brevimanus|evm.model.jjx.Chr40.4257/C. brevimanus|evm.model.jjx.Chr94.781/C. brevimanus|evm.model.jjx.Chr40.208/C. brevimanus|evm.model.jjx.Chr45.1951/C. brevimanus|evm.model.jjx.Chr108.89/C. brevimanus|evm.model.jjx.Chr111.72/C. brevimanus|evm.model.jjx.Chr109.244/C. brevimanus|evm.model.jjx.Chr109.786/C. brevimanus|evm.model.jjx.Chr79.2027/C. brevimanus|evm.model.jjx.Chr14.2997/C. brevimanus…	39
map04723	map04723	Retrograde endocannabinoid signaling	78/1211	179/6443	9.27039494235199e-15	1.8726197783551e-13	1.45073548922421e-13	C. brevimanus|evm.model.jjx.Chr32.803/C. brevimanus|evm.model.jjx.Chr32.790/C. brevimanus|evm.model.jjx.Chr24.49/C. brevimanus|evm.model.jjx.Chr84.2364/C. brevimanus|evm.model.jjx.Chr57.2902/C. brevimanus|evm.model.jjx.Chr87.171/C. brevimanus|evm.model.jjx.Chr86.2258/C. brevimanus|evm.model.jjx.Chr60.2552/C. brevimanus|evm.model.jjx.Chr29.43/C. brevimanus|evm.model.jjx.HiC_scaffold_2595.1/C. brev…	78
map04977	map04977	Vitamin digestion and absorption	51/1211	96/6443	3.09732766581777e-14	5.8655642671424e-13	4.5441057202458e-13	C. brevimanus|evm.model.jjx.Chr41.904/C. brevimanus|evm.model.jjx.Chr19.9/C. brevimanus|evm.model.jjx.Chr81.1426/C. brevimanus|evm.model.jjx.Chr48.1254/C. brevimanus|evm.model.jjx.Chr73.769/C. brevimanus|evm.model.jjx.Chr25.104/C. brevimanus|evm.model.jjx.Chr48.1262/C. brevimanus|evm.model.jjx.Chr25.105/C. brevimanus|evm.model.jjx.Chr13.2714/C. brevimanus|evm.model.jjx.Chr48.1271/C. brevimanus|ev…	51
map00982	map00982	Drug metabolism - cytochrome P450	63/1211	137/6443	1.9046714938659e-13	3.39479683906686e-12	2.62997983363526e-12	C. brevimanus|evm.model.jjx.Chr18.1630/C. brevimanus|evm.model.jjx.Chr54.775/C. brevimanus|evm.model.jjx.Chr54.728/C. brevimanus|evm.model.jjx.Chr48.1281/C. brevimanus|evm.model.jjx.Chr92.1201/C. brevimanus|evm.model.jjx.Chr69.261/C. brevimanus|evm.model.jjx.Chr69.412/C. brevimanus|evm.model.jjx.Chr69.301/C. brevimanus|evm.model.jjx.Chr69.287/C. brevimanus|evm.model.jjx.Chr93.540/C. brevimanus|ev…	63
map04726	map04726	Serotonergic synapse	75/1211	181/6443	7.27958664999019e-13	1.22539708608168e-11	9.49326212250183e-12	C. brevimanus|evm.model.jjx.Chr24.49/C. brevimanus|evm.model.jjx.Chr84.2364/C. brevimanus|evm.model.jjx.Chr57.2902/C. brevimanus|evm.model.jjx.Chr87.171/C. brevimanus|evm.model.jjx.Chr86.2258/C. brevimanus|evm.model.jjx.Chr60.2552/C. brevimanus|evm.model.jjx.Chr98.465/C. brevimanus|evm.model.jjx.Chr98.466/C. brevimanus|evm.model.jjx.Chr89.1331/C. brevimanus|evm.model.jjx.Chr18.1862/C. brevimanus|…	75
map04728	map04728	Dopaminergic synapse	74/1211	181/6443	2.32458746866056e-12	3.7071052789692e-11	2.87192800837288e-11	C. brevimanus|evm.model.jjx.Chr32.803/C. brevimanus|evm.model.jjx.Chr32.790/C. brevimanus|evm.model.jjx.Chr48.1281/C. brevimanus|evm.model.jjx.Chr65.210/C. brevimanus|evm.model.jjx.Chr26.2357/C. brevimanus|evm.model.jjx.Chr29.43/C. brevimanus|evm.model.jjx.HiC_scaffold_2595.1/C. brevimanus|evm.model.jjx.Chr108.16/C. brevimanus|evm.model.jjx.HiC_scaffold_2599.7/C. brevimanus|evm.model.jjx.Chr59.14…	74
map00910	map00910	Nitrogen metabolism	21/1211	25/6443	2.86895696903113e-12	4.34646980808217e-11	3.36724949523128e-11	C. brevimanus|evm.model.jjx.Chr105.285/C. brevimanus|evm.model.jjx.Chr64.279/C. brevimanus|evm.model.jjx.Chr105.1796/C. brevimanus|evm.model.jjx.Chr38.72/C. brevimanus|evm.model.jjx.Chr1.2285/C. brevimanus|evm.model.jjx.Chr72.771/C. brevimanus|evm.model.jjx.Chr1.925/C. brevimanus|evm.model.jjx.Chr1.1074/C. brevimanus|evm.model.jjx.Chr1.2407/C. brevimanus|evm.model.jjx.Chr1.2124/C. brevimanus|evm.…	21
map01040	map01040	Biosynthesis of unsaturated fatty acids	38/1211	68/6443	7.91754016317768e-12	1.14238793782992e-10	8.85018273879009e-11	C. brevimanus|evm.model.jjx.Chr40.4257/C. brevimanus|evm.model.jjx.Chr94.781/C. brevimanus|evm.model.jjx.Chr40.208/C. brevimanus|evm.model.jjx.Chr45.1951/C. brevimanus|evm.model.jjx.Chr108.89/C. brevimanus|evm.model.jjx.Chr111.72/C. brevimanus|evm.model.jjx.Chr109.244/C. brevimanus|evm.model.jjx.Chr109.786/C. brevimanus|evm.model.jjx.Chr14.2997/C. brevimanus|evm.model.jjx.Chr63.2146/C. brevimanus…	38
map04913	map04913	Ovarian steroidogenesis	54/1211	122/6443	6.54425036012983e-11	9.01321754145154e-10	6.98262119765049e-10	C. brevimanus|evm.model.jjx.Chr98.465/C. brevimanus|evm.model.jjx.Chr98.466/C. brevimanus|evm.model.jjx.Chr89.1331/C. brevimanus|evm.model.jjx.Chr18.1862/C. brevimanus|evm.model.jjx.Chr35.992/C. brevimanus|evm.model.jjx.Chr35.1214/C. brevimanus|evm.model.jjx.Chr41.339/C. brevimanus|evm.model.jjx.Chr18.1923/C. brevimanus|evm.model.jjx.Chr98.468/C. brevimanus|evm.model.jjx.HiC_scaffold_3696.34/C. b…	54
map05204	map05204	Chemical carcinogenesis - DNA adducts	61/1211	146/6443	7.18459321422748e-11	9.46492062569968e-10	7.33255966486375e-10	C. brevimanus|evm.model.jjx.Chr18.1630/C. brevimanus|evm.model.jjx.Chr54.775/C. brevimanus|evm.model.jjx.Chr54.728/C. brevimanus|evm.model.jjx.Chr92.1201/C. brevimanus|evm.model.jjx.Chr69.261/C. brevimanus|evm.model.jjx.Chr69.412/C. brevimanus|evm.model.jjx.Chr69.301/C. brevimanus|evm.model.jjx.Chr69.287/C. brevimanus|evm.model.jjx.Chr93.540/C. brevimanus|evm.model.jjx.Chr69.259/C. brevimanus|evm…	61
map00980	map00980	Metabolism of xenobiotics by cytochrome P450	59/1211	141/6443	1.37885618256422e-10	1.74080593048733e-09	1.34861810838518e-09	C. brevimanus|evm.model.jjx.Chr18.1630/C. brevimanus|evm.model.jjx.Chr54.775/C. brevimanus|evm.model.jjx.Chr54.728/C. brevimanus|evm.model.jjx.Chr92.1201/C. brevimanus|evm.model.jjx.Chr69.261/C. brevimanus|evm.model.jjx.Chr69.412/C. brevimanus|evm.model.jjx.Chr69.301/C. brevimanus|evm.model.jjx.Chr69.287/C. brevimanus|evm.model.jjx.Chr93.540/C. brevimanus|evm.model.jjx.Chr69.259/C. brevimanus|evm…	59
map04750	map04750	Inflammatory mediator regulation of TRP channels	62/1211	155/6443	4.33039366384394e-10	5.24843712057886e-09	4.06601173489347e-09	C. brevimanus|evm.model.jjx.Chr98.465/C. brevimanus|evm.model.jjx.Chr98.466/C. brevimanus|evm.model.jjx.Chr89.1331/C. brevimanus|evm.model.jjx.Chr18.1862/C. brevimanus|evm.model.jjx.Chr35.992/C. brevimanus|evm.model.jjx.Chr35.1214/C. brevimanus|evm.model.jjx.Chr41.339/C. brevimanus|evm.model.jjx.Chr18.1630/C. brevimanus|evm.model.jjx.Chr18.1923/C. brevimanus|evm.model.jjx.Chr98.468/C. brevimanus|…	62
map04360	map04360	Axon guidance	65/1211	170/6443	1.50896331052111e-09	1.75852262726114e-08	1.36234339370934e-08	C. brevimanus|evm.model.jjx.Chr71.2898/C. brevimanus|evm.model.jjx.Chr59.1415/C. brevimanus|evm.model.jjx.Chr69.1687/C. brevimanus|evm.model.jjx.Chr47.1607/C. brevimanus|evm.model.jjx.Chr116.40/C. brevimanus|evm.model.jjx.Chr13.979/C. brevimanus|evm.model.jjx.Chr13.466/C. brevimanus|evm.model.jjx.Chr13.230/C. brevimanus|evm.model.jjx.Chr13.309/C. brevimanus|evm.model.jjx.Chr13.479/C. brevimanus|e…	65
map00071	map00071	Fatty acid degradation	40/1211	86/6443	3.45257378438021e-09	3.87455502469334e-08	3.00165284178084e-08	C. brevimanus|evm.model.jjx.Chr40.4257/C. brevimanus|evm.model.jjx.Chr94.781/C. brevimanus|evm.model.jjx.Chr40.208/C. brevimanus|evm.model.jjx.Chr45.1951/C. brevimanus|evm.model.jjx.Chr108.89/C. brevimanus|evm.model.jjx.Chr111.72/C. brevimanus|evm.model.jjx.Chr109.244/C. brevimanus|evm.model.jjx.Chr109.786/C. brevimanus|evm.model.jjx.Chr14.2997/C. brevimanus|evm.model.jjx.Chr63.2146/C. brevimanus…	40
map04725	map04725	Cholinergic synapse	55/1211	139/6443	6.78197324359142e-09	7.33906390288642e-08	5.68563922301085e-08	C. brevimanus|evm.model.jjx.Chr54.1891/C. brevimanus|evm.model.jjx.Chr30.1667/C. brevimanus|evm.model.jjx.Chr42.249/C. brevimanus|evm.model.jjx.Chr30.1490/C. brevimanus|evm.model.jjx.Chr54.2025/C. brevimanus|evm.model.jjx.Chr57.2894/C. brevimanus|evm.model.jjx.Chr42.261/C. brevimanus|evm.model.jjx.Chr47.141/C. brevimanus|evm.model.jjx.Chr27.1141/C. brevimanus|evm.model.jjx.Chr47.475/C. brevimanus…	55
map04964	map04964	Proximal tubule bicarbonate reclamation	20/1211	32/6443	5.87185287385136e-08	6.13507386474814e-07	4.75289724453304e-07	C. brevimanus|evm.model.jjx.Chr105.285/C. brevimanus|evm.model.jjx.Chr64.279/C. brevimanus|evm.model.jjx.Chr38.72/C. brevimanus|evm.model.jjx.Chr1.2285/C. brevimanus|evm.model.jjx.Chr72.771/C. brevimanus|evm.model.jjx.Chr1.925/C. brevimanus|evm.model.jjx.Chr1.1074/C. brevimanus|evm.model.jjx.Chr1.2407/C. brevimanus|evm.model.jjx.Chr1.2124/C. brevimanus|evm.model.jjx.Chr1.1057/C. brevimanus|evm.mo…	20
map04530	map04530	Tight junction	73/1211	221/6443	2.02038305975665e-07	2.04058689035422e-06	1.58086113096749e-06	C. brevimanus|evm.model.jjx.Chr40.3760/C. brevimanus|evm.model.jjx.Chr70.2095/C. brevimanus|evm.model.jjx.Chr74.295/C. brevimanus|evm.model.jjx.Chr74.315/C. brevimanus|evm.model.jjx.Chr74.301/C. brevimanus|evm.model.jjx.Chr74.300/C. brevimanus|evm.model.jjx.Chr74.306/C. brevimanus|evm.model.jjx.Chr74.298/C. brevimanus|evm.model.jjx.Chr74.299/C. brevimanus|evm.model.jjx.Chr74.305/C. brevimanus|evm…	73
map01212	map01212	Fatty acid metabolism	40/1211	97/6443	2.14841997509101e-07	2.09990726597605e-06	1.62681716280236e-06	C. brevimanus|evm.model.jjx.Chr40.4257/C. brevimanus|evm.model.jjx.Chr94.781/C. brevimanus|evm.model.jjx.Chr40.208/C. brevimanus|evm.model.jjx.Chr45.1951/C. brevimanus|evm.model.jjx.Chr108.89/C. brevimanus|evm.model.jjx.Chr111.72/C. brevimanus|evm.model.jjx.Chr109.244/C. brevimanus|evm.model.jjx.Chr109.786/C. brevimanus|evm.model.jjx.Chr14.2997/C. brevimanus|evm.model.jjx.Chr63.2146/C. brevimanus…	40
map03320	map03320	PPAR signaling pathway	39/1211	98/6443	9.10680492143684e-07	8.62300590998551e-06	6.6803207153961e-06	C. brevimanus|evm.model.jjx.Chr40.4257/C. brevimanus|evm.model.jjx.Chr94.781/C. brevimanus|evm.model.jjx.Chr40.208/C. brevimanus|evm.model.jjx.Chr45.1951/C. brevimanus|evm.model.jjx.Chr108.89/C. brevimanus|evm.model.jjx.Chr111.72/C. brevimanus|evm.model.jjx.Chr109.244/C. brevimanus|evm.model.jjx.Chr109.786/C. brevimanus|evm.model.jjx.Chr14.2997/C. brevimanus|evm.model.jjx.Chr63.2146/C. brevimanus…	39
map04212	map04212	Longevity regulating pathway - worm	46/1211	128/6443	2.96104448046763e-06	2.71877720479301e-05	2.10626130508543e-05	C. brevimanus|evm.model.jjx.Chr98.465/C. brevimanus|evm.model.jjx.Chr98.466/C. brevimanus|evm.model.jjx.Chr89.1331/C. brevimanus|evm.model.jjx.Chr18.1862/C. brevimanus|evm.model.jjx.Chr35.992/C. brevimanus|evm.model.jjx.Chr35.1214/C. brevimanus|evm.model.jjx.Chr41.339/C. brevimanus|evm.model.jjx.Chr18.1923/C. brevimanus|evm.model.jjx.Chr98.468/C. brevimanus|evm.model.jjx.HiC_scaffold_3696.34/C. b…	46
map05110	map05110	Vibrio cholerae infection	35/1211	88/6443	3.3409132691176e-06	2.97734329571362e-05	2.30657479570658e-05	C. brevimanus|evm.model.jjx.Chr74.295/C. brevimanus|evm.model.jjx.Chr74.315/C. brevimanus|evm.model.jjx.Chr74.301/C. brevimanus|evm.model.jjx.Chr74.300/C. brevimanus|evm.model.jjx.Chr74.306/C. brevimanus|evm.model.jjx.Chr74.298/C. brevimanus|evm.model.jjx.Chr74.299/C. brevimanus|evm.model.jjx.Chr74.305/C. brevimanus|evm.model.jjx.Chr74.304/C. brevimanus|evm.model.jjx.Chr74.297/C. brevimanus|evm.m…	35
map04919	map04919	Thyroid hormone signaling pathway	53/1211	161/6443	1.07530319230586e-05	9.30905335053359e-05	7.21180787621675e-05	C. brevimanus|evm.model.jjx.Chr74.295/C. brevimanus|evm.model.jjx.Chr74.315/C. brevimanus|evm.model.jjx.Chr74.301/C. brevimanus|evm.model.jjx.Chr74.300/C. brevimanus|evm.model.jjx.Chr74.306/C. brevimanus|evm.model.jjx.Chr74.298/C. brevimanus|evm.model.jjx.Chr74.299/C. brevimanus|evm.model.jjx.Chr74.305/C. brevimanus|evm.model.jjx.Chr74.304/C. brevimanus|evm.model.jjx.Chr74.297/C. brevimanus|evm.m…	53
map02020	map02020	Two-component system	12/1211	19/6443	2.51034981424304e-05	0.000211287776032123	0.000163686552215263	C. brevimanus|evm.model.jjx.Chr63.2144/C. brevimanus|evm.model.jjx.Chr47.125/C. brevimanus|evm.model.jjx.Chr23.24/C. brevimanus|evm.model.jjx.Chr72.148/C. brevimanus|evm.model.jjx.Chr72.149/C. brevimanus|evm.model.jjx.Chr19.1882/C. brevimanus|evm.model.jjx.Chr3.40/C. brevimanus|evm.model.jjx.Chr23.11/C. brevimanus|evm.model.jjx.Chr93.2141/C. brevimanus|evm.model.jjx.Chr7.36/C. brevimanus|evm.mode…	12
map00480	map00480	Glutathione metabolism	29/1211	75/6443	4.27821646281203e-05	0.000350351240062715	0.000271420276303579	C. brevimanus|evm.model.jjx.Chr21.97/C. brevimanus|evm.model.jjx.Chr51.1498/C. brevimanus|evm.model.jjx.Chr51.1503/C. brevimanus|evm.model.jjx.Chr51.1009/C. brevimanus|evm.model.jjx.Chr51.1499/C. brevimanus|evm.model.jjx.Chr61.2093/C. brevimanus|evm.model.jjx.Chr51.1500/C. brevimanus|evm.model.jjx.Chr33.3182/C. brevimanus|evm.model.jjx.Chr35.1029/C. brevimanus|evm.model.jjx.Chr51.1502/C. breviman…	29
map00830	map00830	Retinol metabolism	41/1211	121/6443	5.02296122131064e-05	0.000400515065804506	0.000310282646080962	C. brevimanus|evm.model.jjx.Chr18.1630/C. brevimanus|evm.model.jjx.Chr54.775/C. brevimanus|evm.model.jjx.Chr54.728/C. brevimanus|evm.model.jjx.Chr5.645/C. brevimanus|evm.model.jjx.Chr54.2054/C. brevimanus|evm.model.jjx.Chr54.2056/C. brevimanus|evm.model.jjx.Chr92.1201/C. brevimanus|evm.model.jjx.Chr69.261/C. brevimanus|evm.model.jjx.Chr69.412/C. brevimanus|evm.model.jjx.Chr69.301/C. brevimanus|ev…	41
map05202	map05202	Transcriptional misregulation in cancer	58/1211	190/6443	5.22407711754835e-05	0.00040587060682491	0.000314431632176324	C. brevimanus|evm.model.jjx.Chr40.3977/C. brevimanus|evm.model.jjx.Chr90.1288/C. brevimanus|evm.model.jjx.Chr110.696/C. brevimanus|evm.model.jjx.Chr1.379/C. brevimanus|evm.model.jjx.Chr1.2301/C. brevimanus|evm.model.jjx.Chr1.2114/C. brevimanus|evm.model.jjx.Chr1.631/C. brevimanus|evm.model.jjx.Chr1.619/C. brevimanus|evm.model.jjx.Chr1.1678/C. brevimanus|evm.model.jjx.Chr1.2076/C. brevimanus|evm.m…	58
map00053	map00053	Ascorbate and aldarate metabolism	34/1211	95/6443	6.30315008159012e-05	0.000467504855524226	0.000362180242424535	C. brevimanus|evm.model.jjx.Chr56.275/C. brevimanus|evm.model.jjx.Chr63.2095/C. brevimanus|evm.model.jjx.Chr56.151/C. brevimanus|evm.model.jjx.Chr56.2148/C. brevimanus|evm.model.jjx.Chr63.2089/C. brevimanus|evm.model.jjx.Chr56.266/C. brevimanus|evm.model.jjx.Chr56.2078/C. brevimanus|evm.model.jjx.Chr56.262/C. brevimanus|evm.model.jjx.Chr56.314/C. brevimanus|evm.model.jjx.Chr14.505/C. brevimanus|e…	34
map00500	map00500	Starch and sucrose metabolism	23/1211	55/6443	6.32597329257204e-05	0.000467504855524226	0.000362180242424535	C. brevimanus|evm.model.jjx.Chr5.162/C. brevimanus|evm.model.jjx.Chr96.1330/C. brevimanus|evm.model.jjx.Chr86.2367/C. brevimanus|evm.model.jjx.Chr110.103/C. brevimanus|evm.model.jjx.Chr8.3285/C. brevimanus|evm.model.jjx.Chr96.1207/C. brevimanus|evm.model.jjx.Chr39.1567/C. brevimanus|evm.model.jjx.Chr25.185/C. brevimanus|evm.model.jjx.Chr7.168/C. brevimanus|evm.model.jjx.Chr105.626/C. brevimanus|e…	23
map00730	map00730	Thiamine metabolism	11/1211	18/6443	8.58383825092068e-05	0.000619262616673564	0.000479748353372259	C. brevimanus|evm.model.jjx.Chr47.125/C. brevimanus|evm.model.jjx.Chr23.24/C. brevimanus|evm.model.jjx.Chr72.148/C. brevimanus|evm.model.jjx.Chr72.149/C. brevimanus|evm.model.jjx.Chr19.1882/C. brevimanus|evm.model.jjx.Chr3.40/C. brevimanus|evm.model.jjx.Chr23.11/C. brevimanus|evm.model.jjx.Chr93.2141/C. brevimanus|evm.model.jjx.Chr7.36/C. brevimanus|evm.model.jjx.Chr28.569/C. brevimanus|evm.model…	11
map04514	map04514	Cell adhesion molecules	25/1211	65/6443	0.000157434645115359	0.00110936505744079	0.000859435149589355	C. brevimanus|evm.model.jjx.Chr5.202/C. brevimanus|evm.model.jjx.Chr75.1507/C. brevimanus|evm.model.jjx.Chr5.198/C. brevimanus|evm.model.jjx.Chr98.296/C. brevimanus|evm.model.jjx.Chr101.148/C. brevimanus|evm.model.jjx.Chr35.1093/C. brevimanus|evm.model.jjx.Chr111.250/C. brevimanus|evm.model.jjx.Chr56.599/C. brevimanus|evm.model.jjx.Chr105.143/C. brevimanus|evm.model.jjx.Chr72.479/C. brevimanus|ev…	25
map04914	map04914	Progesterone-mediated oocyte maturation	58/1211	198/6443	0.000184560040172252	0.00127094754936801	0.000984614568383069	C. brevimanus|evm.model.jjx.Chr98.1191/C. brevimanus|evm.model.jjx.Chr5.970/C. brevimanus|evm.model.jjx.Chr101.895/C. brevimanus|evm.model.jjx.Chr23.3022/C. brevimanus|evm.model.jjx.Chr4.106/C. brevimanus|evm.model.jjx.Chr30.2623/C. brevimanus|evm.model.jjx.Chr57.817/C. brevimanus|evm.model.jjx.Chr72.192/C. brevimanus|evm.model.jjx.Chr55.2409/C. brevimanus|evm.model.jjx.Chr96.453/C. brevimanus|ev…	58
map04973	map04973	Carbohydrate digestion and absorption	18/1211	42/6443	0.000271768084403988	0.00182990510165352	0.00141764404262197	C. brevimanus|evm.model.jjx.Chr5.162/C. brevimanus|evm.model.jjx.Chr59.1415/C. brevimanus|evm.model.jjx.Chr25.185/C. brevimanus|evm.model.jjx.Chr7.168/C. brevimanus|evm.model.jjx.Chr105.626/C. brevimanus|evm.model.jjx.Chr57.1864/C. brevimanus|evm.model.jjx.Chr57.1548/C. brevimanus|evm.model.jjx.Chr57.1878/C. brevimanus|evm.model.jjx.Chr57.1879/C. brevimanus|evm.model.jjx.Chr53.2801/C. brevimanus|…	18
map04146	map04146	Peroxisome	44/1211	142/6443	0.000283936491843254	0.00187027732670665	0.00144892077073331	C. brevimanus|evm.model.jjx.Chr40.4257/C. brevimanus|evm.model.jjx.Chr94.781/C. brevimanus|evm.model.jjx.Chr40.208/C. brevimanus|evm.model.jjx.Chr45.1951/C. brevimanus|evm.model.jjx.Chr108.89/C. brevimanus|evm.model.jjx.Chr111.72/C. brevimanus|evm.model.jjx.Chr109.244/C. brevimanus|evm.model.jjx.Chr109.786/C. brevimanus|evm.model.jjx.Chr14.2997/C. brevimanus|evm.model.jjx.Chr63.2146/C. brevimanus…	44
map05164	map05164	Influenza A	45/1211	147/6443	0.000329222733362925	0.00207830688899962	0.0016100831552785	C. brevimanus|evm.model.jjx.Chr26.676/C. brevimanus|evm.model.jjx.HiC_scaffold_2060.2/C. brevimanus|evm.model.jjx.HiC_scaffold_2061.3/C. brevimanus|evm.model.jjx.HiC_scaffold_2830.4/C. brevimanus|evm.model.jjx.HiC_scaffold_2734.6/C. brevimanus|evm.model.jjx.HiC_scaffold_2776.18/C. brevimanus|evm.model.jjx.HiC_scaffold_2780.14/C. brevimanus|evm.model.jjx.Chr86.2224/C. brevimanus|evm.model.jjx.Chr1…	45
map05020	map05020	Prion disease	19/1211	46/6443	0.000329236734891029	0.00207830688899962	0.0016100831552785	C. brevimanus|evm.model.jjx.Chr75.1506/C. brevimanus|evm.model.jjx.Chr29.43/C. brevimanus|evm.model.jjx.HiC_scaffold_2595.1/C. brevimanus|evm.model.jjx.Chr108.16/C. brevimanus|evm.model.jjx.HiC_scaffold_2599.7/C. brevimanus|evm.model.jjx.Chr51.1725/C. brevimanus|evm.model.jjx.HiC_scaffold_2552.11/C. brevimanus|evm.model.jjx.Chr29.2371/C. brevimanus|evm.model.jjx.HiC_scaffold_2607.8/C. brevimanus|…	19
map00981	map00981	Insect hormone biosynthesis	20/1211	51/6443	0.000522544783638729	0.00321235099520442	0.00248863738728708	C. brevimanus|evm.model.jjx.Chr30.1667/C. brevimanus|evm.model.jjx.Chr30.1490/C. brevimanus|evm.model.jjx.Chr54.2025/C. brevimanus|evm.model.jjx.Chr57.2894/C. brevimanus|evm.model.jjx.Chr28.246/C. brevimanus|evm.model.jjx.Chr92.379/C. brevimanus|evm.model.jjx.Chr3.1457/C. brevimanus|evm.model.jjx.Chr30.2602/C. brevimanus|evm.model.jjx.Chr3.1328/C. brevimanus|evm.model.jjx.Chr3.1341/C. brevimanus|…	20
map01220	map01220	Degradation of aromatic compounds	12/1211	24/6443	0.000530090923301059	0.00321235099520442	0.00248863738728708	C. brevimanus|evm.model.jjx.Chr27.1346/C. brevimanus|evm.model.jjx.Chr108.377/C. brevimanus|evm.model.jjx.Chr8.735/C. brevimanus|evm.model.jjx.Chr108.395/C. brevimanus|evm.model.jjx.Chr108.388/C. brevimanus|evm.model.jjx.Chr108.387/C. brevimanus|evm.model.jjx.Chr57.620/C. brevimanus|evm.model.jjx.Chr108.390/C. brevimanus|evm.model.jjx.Chr8.772/C. brevimanus|evm.model.jjx.Chr77.95/C. brevimanus|ev…	12
map04611	map04611	Platelet activation	53/1211	184/6443	0.000540997726235442	0.00321416296175174	0.00249004113416932	C. brevimanus|evm.model.jjx.Chr74.295/C. brevimanus|evm.model.jjx.Chr74.315/C. brevimanus|evm.model.jjx.Chr74.301/C. brevimanus|evm.model.jjx.Chr74.300/C. brevimanus|evm.model.jjx.Chr74.306/C. brevimanus|evm.model.jjx.Chr74.298/C. brevimanus|evm.model.jjx.Chr74.299/C. brevimanus|evm.model.jjx.Chr74.305/C. brevimanus|evm.model.jjx.Chr74.304/C. brevimanus|evm.model.jjx.Chr74.297/C. brevimanus|evm.m…	53
map04972	map04972	Pancreatic secretion	46/1211	155/6443	0.000610006277485944	0.00355445965535079	0.00275367206233533	C. brevimanus|evm.model.jjx.Chr26.676/C. brevimanus|evm.model.jjx.HiC_scaffold_2060.2/C. brevimanus|evm.model.jjx.HiC_scaffold_2061.3/C. brevimanus|evm.model.jjx.HiC_scaffold_2830.4/C. brevimanus|evm.model.jjx.HiC_scaffold_2734.6/C. brevimanus|evm.model.jjx.HiC_scaffold_2776.18/C. brevimanus|evm.model.jjx.HiC_scaffold_2780.14/C. brevimanus|evm.model.jjx.HiC_scaffold_2779.3/C. brevimanus|evm.model…	46
map04745	map04745	Phototransduction - fly	26/1211	75/6443	0.000784294947403809	0.0044837994162897	0.00347363998552233	C. brevimanus|evm.model.jjx.Chr74.295/C. brevimanus|evm.model.jjx.Chr74.315/C. brevimanus|evm.model.jjx.Chr74.301/C. brevimanus|evm.model.jjx.Chr74.300/C. brevimanus|evm.model.jjx.Chr74.306/C. brevimanus|evm.model.jjx.Chr74.298/C. brevimanus|evm.model.jjx.Chr74.299/C. brevimanus|evm.model.jjx.Chr74.305/C. brevimanus|evm.model.jjx.Chr74.304/C. brevimanus|evm.model.jjx.Chr74.297/C. brevimanus|evm.m…	26
map00350	map00350	Tyrosine metabolism	17/1211	43/6443	0.00121334487745319	0.00680821292348733	0.00527438416514738	C. brevimanus|evm.model.jjx.Chr48.1281/C. brevimanus|evm.model.jjx.Chr42.86/C. brevimanus|evm.model.jjx.Chr87.1058/C. brevimanus|evm.model.jjx.Chr34.251/C. brevimanus|evm.model.jjx.Chr34.326/C. brevimanus|evm.model.jjx.Chr71.256/C. brevimanus|evm.model.jjx.Chr57.3036/C. brevimanus|evm.model.jjx.Chr71.223/C. brevimanus|evm.model.jjx.Chr57.3063/C. brevimanus|evm.model.jjx.Chr28.115/C. brevimanus|ev…	17
map05414	map05414	Dilated cardiomyopathy	32/1211	102/6443	0.00146734919933429	0.00808376013451433	0.00626256213304393	C. brevimanus|evm.model.jjx.Chr74.295/C. brevimanus|evm.model.jjx.Chr74.315/C. brevimanus|evm.model.jjx.Chr74.301/C. brevimanus|evm.model.jjx.Chr74.300/C. brevimanus|evm.model.jjx.Chr74.306/C. brevimanus|evm.model.jjx.Chr74.298/C. brevimanus|evm.model.jjx.Chr74.299/C. brevimanus|evm.model.jjx.Chr74.305/C. brevimanus|evm.model.jjx.Chr74.304/C. brevimanus|evm.model.jjx.Chr74.297/C. brevimanus|evm.m…	32
map05032	map05032	Morphine addiction	32/1211	105/6443	0.00247529831910287	0.0133931319765745	0.0103757805481192	C. brevimanus|evm.model.jjx.Chr24.49/C. brevimanus|evm.model.jjx.Chr84.2364/C. brevimanus|evm.model.jjx.Chr57.2902/C. brevimanus|evm.model.jjx.Chr87.171/C. brevimanus|evm.model.jjx.Chr86.2258/C. brevimanus|evm.model.jjx.Chr60.2552/C. brevimanus|evm.model.jjx.Chr29.43/C. brevimanus|evm.model.jjx.HiC_scaffold_2595.1/C. brevimanus|evm.model.jjx.Chr108.16/C. brevimanus|evm.model.jjx.HiC_scaffold_2599…	32
map04610	map04610	Complement and coagulation cascades	16/1211	44/6443	0.0045356912498257	0.0241107798017051	0.0186788393113782	C. brevimanus|evm.model.jjx.Chr86.2224/C. brevimanus|evm.model.jjx.Chr101.391/C. brevimanus|evm.model.jjx.Chr86.2225/C. brevimanus|evm.model.jjx.HiC_scaffold_2835.5/C. brevimanus|evm.model.jjx.Chr69.1488/C. brevimanus|evm.model.jjx.Chr84.1895/C. brevimanus|evm.model.jjx.Chr21.1812/C. brevimanus|evm.model.jjx.Chr21.1111/C. brevimanus|evm.model.jjx.Chr21.1110/C. brevimanus|evm.model.jjx.Chr112.186/…	16
map00604	map00604	Glycosphingolipid biosynthesis - ganglio series	8/1211	16/6443	0.00466175050194867	0.0242953511083341	0.0188218283729668	C. brevimanus|evm.model.jjx.Chr48.2188/C. brevimanus|evm.model.jjx.Chr85.412/C. brevimanus|evm.model.jjx.Chr85.151/C. brevimanus|evm.model.jjx.Chr72.145/C. brevimanus|evm.model.jjx.Chr72.143/C. brevimanus|evm.model.jjx.Chr85.425/C. brevimanus|evm.model.jjx.Chr96.1333/C. brevimanus|evm.model.jjx.Chr109.2029	8
map00930	map00930	Caprolactam degradation	11/1211	26/6443	0.00477141694252349	0.0242953511083341	0.0188218283729668	C. brevimanus|evm.model.jjx.Chr108.377/C. brevimanus|evm.model.jjx.Chr8.735/C. brevimanus|evm.model.jjx.Chr108.395/C. brevimanus|evm.model.jjx.Chr108.388/C. brevimanus|evm.model.jjx.Chr108.387/C. brevimanus|evm.model.jjx.Chr57.620/C. brevimanus|evm.model.jjx.Chr108.390/C. brevimanus|evm.model.jjx.Chr8.772/C. brevimanus|evm.model.jjx.Chr77.95/C. brevimanus|evm.model.jjx.Chr8.795/C. brevimanus|evm.…	11
map04727	map04727	GABAergic synapse	26/1211	84/6443	0.0048109606155117	0.0242953511083341	0.0188218283729668	C. brevimanus|evm.model.jjx.Chr24.49/C. brevimanus|evm.model.jjx.Chr84.2364/C. brevimanus|evm.model.jjx.Chr57.2902/C. brevimanus|evm.model.jjx.Chr87.171/C. brevimanus|evm.model.jjx.Chr86.2258/C. brevimanus|evm.model.jjx.Chr60.2552/C. brevimanus|evm.model.jjx.Chr29.43/C. brevimanus|evm.model.jjx.HiC_scaffold_2595.1/C. brevimanus|evm.model.jjx.Chr108.16/C. brevimanus|evm.model.jjx.HiC_scaffold_2599…	26
map00100	map00100	Steroid biosynthesis	14/1211	37/6443	0.00514929973357472	0.0255776691684121	0.0198152517788984	C. brevimanus|evm.model.jjx.Chr98.468/C. brevimanus|evm.model.jjx.Chr35.1093/C. brevimanus|evm.model.jjx.Chr72.479/C. brevimanus|evm.model.jjx.Chr72.401/C. brevimanus|evm.model.jjx.Chr72.449/C. brevimanus|evm.model.jjx.Chr18.353/C. brevimanus|evm.model.jjx.Chr92.445/C. brevimanus|evm.model.jjx.Chr55.346/C. brevimanus|evm.model.jjx.Chr35.884/C. brevimanus|evm.model.jjx.Chr95.1922/C. brevimanus|evm…	14
map00030	map00030	Pentose phosphate pathway	12/1211	31/6443	0.00759624871858578	0.0371236026085724	0.0287599909039835	C. brevimanus|evm.model.jjx.Chr108.377/C. brevimanus|evm.model.jjx.Chr8.735/C. brevimanus|evm.model.jjx.Chr108.395/C. brevimanus|evm.model.jjx.Chr108.388/C. brevimanus|evm.model.jjx.Chr108.387/C. brevimanus|evm.model.jjx.Chr57.620/C. brevimanus|evm.model.jjx.Chr108.390/C. brevimanus|evm.model.jjx.Chr8.772/C. brevimanus|evm.model.jjx.Chr77.95/C. brevimanus|evm.model.jjx.Chr8.795/C. brevimanus|evm.…	12
map05418	map05418	Fluid shear stress and atherosclerosis	39/1211	143/6443	0.00772605345686305	0.0371586380544366	0.0287871331809601	C. brevimanus|evm.model.jjx.Chr108.88/C. brevimanus|evm.model.jjx.Chr70.2095/C. brevimanus|evm.model.jjx.Chr74.295/C. brevimanus|evm.model.jjx.Chr74.315/C. brevimanus|evm.model.jjx.Chr74.301/C. brevimanus|evm.model.jjx.Chr74.300/C. brevimanus|evm.model.jjx.Chr74.306/C. brevimanus|evm.model.jjx.Chr74.298/C. brevimanus|evm.model.jjx.Chr74.299/C. brevimanus|evm.model.jjx.Chr74.305/C. brevimanus|evm.…	39
map00740	map00740	Riboflavin metabolism	6/1211	11/6443	0.00847474334725607	0.0401226130346655	0.0310833514216794	C. brevimanus|evm.model.jjx.Chr96.1330/C. brevimanus|evm.model.jjx.Chr86.2367/C. brevimanus|evm.model.jjx.Chr110.103/C. brevimanus|evm.model.jjx.Chr8.3285/C. brevimanus|evm.model.jjx.Chr96.1207/C. brevimanus|evm.model.jjx.Chr39.1567	6

## Sheet: waxie-ref_waxie-kegg.result
	ID	Description	GeneRatio	BgRatio	pvalue	p.adjust	qvalue	geneID	Count
map04914	map04914	Progesterone-mediated oocyte maturation	251/2147	393/6889	4.85631314883867e-43	1.50545707613999e-40	1.3342081387862e-40	R. ranina|evm.model.ctg028650_np12.13/R. ranina|evm.model.ctg060770_np12.5/R. ranina|evm.model.ctg114610_np12.5/R. ranina|evm.model.ctg036380_np12.5/R. ranina|evm.model.ctg073440_np12.9/R. ranina|evm.model.ctg108460_np12.1/R. ranina|evm.model.ctg028350_np12.3/R. ranina|evm.model.ctg036890_np12.20/R. ranina|evm.model.ctg161020_np12.25/R. ranina|evm.model.ctg059980_np12.10/R. ranina|evm.model.ctg06…	251
map03010	map03010	Ribosome	247/2147	413/6889	2.626596471843e-35	4.07122453135664e-33	3.60811410079485e-33	R. ranina|evm.model.ctg060770_np12.5/R. ranina|evm.model.ctg114610_np12.5/R. ranina|evm.model.ctg036380_np12.5/R. ranina|evm.model.ctg073440_np12.9/R. ranina|evm.model.ctg108460_np12.1/R. ranina|evm.model.ctg028350_np12.3/R. ranina|evm.model.ctg036890_np12.20/R. ranina|evm.model.ctg161020_np12.25/R. ranina|evm.model.ctg059980_np12.10/R. ranina|evm.model.ctg062850_np12.9/R. ranina|evm.model.ctg052…	247
map00660	map00660	C5-Branched dibasic acid metabolism	49/2147	57/6889	1.00205909693137e-17	7.76595800121813e-16	6.88256379734442e-16	R. ranina|evm.model.ctg119810_np12.7/R. ranina|evm.model.ctg038340_np12.35/R. ranina|evm.model.ctg123680_np12.58/R. ranina|evm.model.ctg106280_np12.9/R. ranina|evm.model.ctg066000_np12.1/R. ranina|evm.model.ctg117080_np12.13/R. ranina|evm.model.ctg134710_np12.40/R. ranina|evm.model.ctg157100_np12.5/R. ranina|evm.model.ctg165480_np12.16/R. ranina|evm.model.ctg051290_np12.1/R. ranina|evm.model.ctg0…	49
map00966	map00966	Glucosinolate biosynthesis	49/2147	57/6889	1.00205909693137e-17	7.76595800121813e-16	6.88256379734442e-16	R. ranina|evm.model.ctg119810_np12.7/R. ranina|evm.model.ctg038340_np12.35/R. ranina|evm.model.ctg123680_np12.58/R. ranina|evm.model.ctg106280_np12.9/R. ranina|evm.model.ctg066000_np12.1/R. ranina|evm.model.ctg117080_np12.13/R. ranina|evm.model.ctg134710_np12.40/R. ranina|evm.model.ctg157100_np12.5/R. ranina|evm.model.ctg165480_np12.16/R. ranina|evm.model.ctg051290_np12.1/R. ranina|evm.model.ctg0…	49
map00290	map00290	Valine, leucine and isoleucine biosynthesis	49/2147	59/6889	1.86433997841014e-16	1.15589078661429e-14	1.02440575655799e-14	R. ranina|evm.model.ctg119810_np12.7/R. ranina|evm.model.ctg038340_np12.35/R. ranina|evm.model.ctg123680_np12.58/R. ranina|evm.model.ctg106280_np12.9/R. ranina|evm.model.ctg066000_np12.1/R. ranina|evm.model.ctg117080_np12.13/R. ranina|evm.model.ctg134710_np12.40/R. ranina|evm.model.ctg157100_np12.5/R. ranina|evm.model.ctg165480_np12.16/R. ranina|evm.model.ctg051290_np12.1/R. ranina|evm.model.ctg0…	49
map04139	map04139	Mitophagy - yeast	55/2147	79/6889	1.86896939902229e-12	9.65634189494848e-11	8.55791251131257e-11	R. ranina|evm.model.ctg061900_np12.5/R. ranina|evm.model.ctg066760_np12.12/R. ranina|evm.model.ctg110160_np12.10/R. ranina|evm.model.ctg121170_np12.23/R. ranina|evm.model.ctg055100_np12.27/R. ranina|evm.model.ctg103350_np12.5/R. ranina|evm.model.ctg081820_np12.3/R. ranina|evm.model.ctg083610_np12.13/R. ranina|evm.model.ctg004800_np12.17/R. ranina|evm.model.ctg002750_np12.76/R. ranina|evm.model.ct…	55
map01210	map01210	2-Oxocarboxylic acid metabolism	51/2147	74/6889	2.21082426720084e-11	9.790793183318e-10	8.67706968029201e-10	R. ranina|evm.model.ctg119810_np12.7/R. ranina|evm.model.ctg096350_np12.5/R. ranina|evm.model.ctg038340_np12.35/R. ranina|evm.model.ctg123680_np12.58/R. ranina|evm.model.ctg106280_np12.9/R. ranina|evm.model.ctg066000_np12.1/R. ranina|evm.model.ctg117080_np12.13/R. ranina|evm.model.ctg134710_np12.40/R. ranina|evm.model.ctg157100_np12.5/R. ranina|evm.model.ctg165480_np12.16/R. ranina|evm.model.ctg0…	51
map01230	map01230	Biosynthesis of amino acids	71/2147	126/6889	3.18179373599639e-09	1.2329450726986e-07	1.09269495407245e-07	R. ranina|evm.model.ctg119810_np12.7/R. ranina|evm.model.ctg096350_np12.5/R. ranina|evm.model.ctg038340_np12.35/R. ranina|evm.model.ctg123680_np12.58/R. ranina|evm.model.ctg105530_np12.183/R. ranina|evm.model.ctg106280_np12.9/R. ranina|evm.model.ctg066000_np12.1/R. ranina|evm.model.ctg117080_np12.13/R. ranina|evm.model.ctg134710_np12.40/R. ranina|evm.model.ctg157100_np12.5/R. ranina|evm.model.ctg…	71
map04971	map04971	Gastric acid secretion	52/2147	100/6889	1.02921653130713e-05	0.000354507916339122	0.000314181888504282	R. ranina|evm.model.ctg117270_np12.96/R. ranina|evm.model.ctg006170_np12.34/R. ranina|evm.model.ctg099050_np12.14/R. ranina|evm.model.ctg008950_np12.13/R. ranina|evm.model.ctg091820_np12.2/R. ranina|evm.model.ctg103430_np12.2/R. ranina|evm.model.ctg117050_np12.24/R. ranina|evm.model.ctg105610_np12.37/R. ranina|evm.model.ctg098350_np12.5/R. ranina|evm.model.ctg138270_np12.22/R. ranina|evm.model.ct…	52
map04962	map04962	Vasopressin-regulated water reabsorption	32/2147	56/6889	4.7873230736165e-05	0.00148407015282111	0.00131525402338306	R. ranina|evm.model.ctg013950_np12.4/R. ranina|evm.model.ctg035270_np12.16/R. ranina|evm.model.ctg055390_np12.4/R. ranina|evm.model.ctg124550_np12.5/R. ranina|evm.model.ctg086890_np12.5/R. ranina|evm.model.ctg096050_np12.3/R. ranina|evm.model.ctg094990_np12.35/R. ranina|evm.model.ctg086890_np12.6/R. ranina|evm.model.ctg092270_np12.34/R. ranina|evm.model.ctg013030_np12.36/R. ranina|evm.model.ctg09…	32
map04217	map04217	Necroptosis	57/2147	118/6889	6.48560794115609e-05	0.00182776223796217	0.00161985040444186	R. ranina|evm.model.ctg147080_np12.2/R. ranina|evm.model.ctg110160_np12.10/R. ranina|evm.model.ctg121170_np12.23/R. ranina|evm.model.ctg055100_np12.27/R. ranina|evm.model.ctg103350_np12.5/R. ranina|evm.model.ctg081820_np12.3/R. ranina|evm.model.ctg083610_np12.13/R. ranina|evm.model.ctg004800_np12.17/R. ranina|evm.model.ctg002750_np12.76/R. ranina|evm.model.ctg140480_np12.22/R. ranina|evm.model.ct…	57
map00230	map00230	Purine metabolism	96/2147	228/6889	0.000255993527254498	0.00661316612074121	0.00586090443977404	R. ranina|evm.model.ctg049570_np12.1/R. ranina|evm.model.ctg154990_np12.9/R. ranina|evm.model.ctg048010_np12.88/R. ranina|evm.model.ctg105560_np12.5/R. ranina|evm.model.ctg106430_np12.8/R. ranina|evm.model.ctg135400_np12.12/R. ranina|evm.model.ctg139580_np12.97/R. ranina|evm.model.ctg143470_np12.6/R. ranina|evm.model.ctg120750_np12.7/R. ranina|evm.model.ctg036690_np12.29/R. ranina|evm.model.ctg07…	96
map04621	map04621	NOD-like receptor signaling pathway	54/2147	118/6889	0.000558320955712364	0.0117389475864434	0.0104036173856086	R. ranina|evm.model.ctg003180_np12.6/R. ranina|evm.model.ctg110160_np12.10/R. ranina|evm.model.ctg121170_np12.23/R. ranina|evm.model.ctg055100_np12.27/R. ranina|evm.model.ctg103350_np12.5/R. ranina|evm.model.ctg081820_np12.3/R. ranina|evm.model.ctg083610_np12.13/R. ranina|evm.model.ctg004800_np12.17/R. ranina|evm.model.ctg002750_np12.76/R. ranina|evm.model.ctg140480_np12.22/R. ranina|evm.model.ct…	54
map04270	map04270	Vascular smooth muscle contraction	66/2147	150/6889	0.000561709517081678	0.0117389475864434	0.0104036173856086	R. ranina|evm.model.ctg117270_np12.96/R. ranina|evm.model.ctg006170_np12.34/R. ranina|evm.model.ctg099050_np12.14/R. ranina|evm.model.ctg008950_np12.13/R. ranina|evm.model.ctg155400_np12.49/R. ranina|evm.model.ctg091820_np12.2/R. ranina|evm.model.ctg103430_np12.2/R. ranina|evm.model.ctg117050_np12.24/R. ranina|evm.model.ctg115420_np12.1/R. ranina|evm.model.ctg107370_np12.131/R. ranina|evm.model.c…	66
map00340	map00340	Histidine metabolism	22/2147	38/6889	0.000568013592892424	0.0117389475864434	0.0104036173856086	R. ranina|evm.model.ctg081910_np12.38/R. ranina|evm.model.ctg168350_np12.11/R. ranina|evm.model.ctg058160_np12.82/R. ranina|evm.model.ctg007300_np12.7/R. ranina|evm.model.ctg025760_np12.38/R. ranina|evm.model.ctg127350_np12.15/R. ranina|evm.model.ctg100170_np12.5/R. ranina|evm.model.ctg047890_np12.3/R. ranina|evm.model.ctg048810_np12.2/R. ranina|evm.model.ctg050890_np12.7/R. ranina|evm.model.ctg0…	22
map04927	map04927	Cortisol synthesis and secretion	38/2147	80/6889	0.00153179542440586	0.0289150718268714	0.0256259210418113	R. ranina|evm.model.ctg154590_np12.5/R. ranina|evm.model.ctg055390_np12.4/R. ranina|evm.model.ctg091820_np12.2/R. ranina|evm.model.ctg103430_np12.2/R. ranina|evm.model.ctg082870_np12.105/R. ranina|evm.model.ctg115420_np12.1/R. ranina|evm.model.ctg107370_np12.131/R. ranina|evm.model.ctg107370_np12.135/R. ranina|evm.model.ctg115420_np12.4/R. ranina|evm.model.ctg147310_np12.2/R. ranina|evm.model.ctg…	38
map04611	map04611	Platelet activation	74/2147	177/6889	0.00158566522921553	0.0289150718268714	0.0256259210418113	R. ranina|evm.model.ctg117270_np12.96/R. ranina|evm.model.ctg099050_np12.14/R. ranina|evm.model.ctg008950_np12.13/R. ranina|evm.model.ctg155400_np12.49/R. ranina|evm.model.ctg161760_np12.12/R. ranina|evm.model.ctg091820_np12.2/R. ranina|evm.model.ctg103430_np12.2/R. ranina|evm.model.ctg117050_np12.24/R. ranina|evm.model.ctg105610_np12.37/R. ranina|evm.model.ctg098350_np12.5/R. ranina|evm.model.ct…	74
map04728	map04728	Dopaminergic synapse	57/2147	131/6889	0.00178606172653531	0.0307599519569969	0.0272609421418547	R. ranina|evm.model.ctg006170_np12.34/R. ranina|evm.model.ctg157490_np12.5/R. ranina|evm.model.ctg163670_np12.27/R. ranina|evm.model.ctg071190_np12.1/R. ranina|evm.model.ctg173140_np12.1/R. ranina|evm.model.ctg055390_np12.4/R. ranina|evm.model.ctg033820_np12.19/R. ranina|evm.model.ctg095480_np12.47/R. ranina|evm.model.ctg134760_np12.55/R. ranina|evm.model.ctg084460_np12.107/R. ranina|evm.model.ct…	57
map04713	map04713	Circadian entrainment	53/2147	122/6889	0.00264915527094386	0.0420874040715452	0.0372998725387888	R. ranina|evm.model.ctg006170_np12.34/R. ranina|evm.model.ctg134760_np12.55/R. ranina|evm.model.ctg084460_np12.107/R. ranina|evm.model.ctg084460_np12.43/R. ranina|evm.model.ctg098950_np12.48/R. ranina|evm.model.ctg159210_np12.136/R. ranina|evm.model.ctg085570_np12.50/R. ranina|evm.model.ctg132320_np12.46/R. ranina|evm.model.ctg076860_np12.6/R. ranina|evm.model.ctg091820_np12.2/R. ranina|evm.model…	53
map00310	map00310	Lysine degradation	65/2147	155/6889	0.0027153163917126	0.0420874040715452	0.0372998725387888	R. ranina|evm.model.ctg169190_np12.13/R. ranina|evm.model.ctg048730_np12.15/R. ranina|evm.model.ctg160820_np12.1/R. ranina|evm.model.ctg049230_np12.58/R. ranina|evm.model.ctg114460_np12.85/R. ranina|evm.model.ctg104020_np12.115/R. ranina|evm.model.ctg160820_np12.19/R. ranina|evm.model.ctg015500_np12.13/R. ranina|evm.model.ctg029300_np12.14/R. ranina|evm.model.ctg148890_np12.5/R. ranina|evm.model.…	65
map04371	map04371	Apelin signaling pathway	63/2147	150/6889	0.00299729120931321	0.0440305123181502	0.0390219480985983	R. ranina|evm.model.ctg117270_np12.96/R. ranina|evm.model.ctg006170_np12.34/R. ranina|evm.model.ctg099050_np12.14/R. ranina|evm.model.ctg008950_np12.13/R. ranina|evm.model.ctg077570_np12.86/R. ranina|evm.model.ctg091820_np12.2/R. ranina|evm.model.ctg103430_np12.2/R. ranina|evm.model.ctg117050_np12.24/R. ranina|evm.model.ctg105610_np12.37/R. ranina|evm.model.ctg098350_np12.5/R. ranina|evm.model.ct…	63
map00240	map00240	Pyrimidine metabolism	60/2147	142/6889	0.00315774010411175	0.0440305123181502	0.0390219480985983	R. ranina|evm.model.ctg051860_np12.17/R. ranina|evm.model.ctg049570_np12.1/R. ranina|evm.model.ctg025910_np12.3/R. ranina|evm.model.ctg105560_np12.5/R. ranina|evm.model.ctg106430_np12.8/R. ranina|evm.model.ctg135400_np12.12/R. ranina|evm.model.ctg139580_np12.97/R. ranina|evm.model.ctg143470_np12.6/R. ranina|evm.model.ctg120750_np12.7/R. ranina|evm.model.ctg036690_np12.29/R. ranina|evm.model.ctg07…	60
map00330	map00330	Arginine and proline metabolism	30/2147	62/6889	0.00326677994618534	0.0440305123181502	0.0390219480985983	R. ranina|evm.model.ctg081910_np12.38/R. ranina|evm.model.ctg168350_np12.11/R. ranina|evm.model.ctg058160_np12.82/R. ranina|evm.model.ctg007300_np12.7/R. ranina|evm.model.ctg025760_np12.38/R. ranina|evm.model.ctg127350_np12.15/R. ranina|evm.model.ctg100170_np12.5/R. ranina|evm.model.ctg047890_np12.3/R. ranina|evm.model.ctg048810_np12.2/R. ranina|evm.model.ctg050890_np12.7/R. ranina|evm.model.ctg0…	30
map04921	map04921	Oxytocin signaling pathway	71/2147	173/6889	0.0034332928679351	0.0443466995441617	0.0393021683566255	R. ranina|evm.model.ctg117270_np12.96/R. ranina|evm.model.ctg006170_np12.34/R. ranina|evm.model.ctg099050_np12.14/R. ranina|evm.model.ctg008950_np12.13/R. ranina|evm.model.ctg155400_np12.49/R. ranina|evm.model.ctg030460_np12.16/R. ranina|evm.model.ctg091820_np12.2/R. ranina|evm.model.ctg153730_np12.1/R. ranina|evm.model.ctg103430_np12.2/R. ranina|evm.model.ctg117050_np12.24/R. ranina|evm.model.ct…	71
map04623	map04623	Cytosolic DNA-sensing pathway	29/2147	60/6889	0.0038750149406511	0.0480501852640736	0.0425843747162079	R. ranina|evm.model.ctg003180_np12.6/R. ranina|evm.model.ctg105560_np12.5/R. ranina|evm.model.ctg106430_np12.8/R. ranina|evm.model.ctg135400_np12.12/R. ranina|evm.model.ctg139580_np12.97/R. ranina|evm.model.ctg143470_np12.6/R. ranina|evm.model.ctg120750_np12.7/R. ranina|evm.model.ctg036690_np12.29/R. ranina|evm.model.ctg077350_np12.3/R. ranina|evm.model.ctg089290_np12.3/R. ranina|evm.model.ctg021…	29

## Sheet: zhenxie-ref_aijiexie-kegg.resul
	ID	Description	GeneRatio	BgRatio	pvalue	p.adjust	qvalue	geneID	Count
map04060	map04060	Cytokine-cytokine receptor interaction	51/222	76/6832	1.24946842822745e-59	2.71134648925357e-57	1.95969258743043e-57	A. integerrimus|evm.model.ctg024980_np12.3/A. integerrimus|evm.model.ctg029200_np12.141/A. integerrimus|evm.model.ctg020000_np12.45/A. integerrimus|evm.model.ctg022200_np12.29/A. integerrimus|evm.model.ctg028300_np12.15/A. integerrimus|evm.model.ctg021510_np12.2/A. integerrimus|evm.model.ctg020720_np12.8/A. integerrimus|evm.model.ctg022890_np12.408/A. integerrimus|evm.model.ctg028290_np12.129/A. …	51
map05202	map05202	Transcriptional misregulation in cancer	71/222	218/6832	1.23357047298966e-54	1.33842396319378e-52	9.67378949870839e-53	A. integerrimus|evm.model.ctg003490_np12.86/A. integerrimus|evm.model.ctg022900_np12.23/A. integerrimus|evm.model.ctg024980_np12.3/A. integerrimus|evm.model.ctg029200_np12.141/A. integerrimus|evm.model.ctg020000_np12.45/A. integerrimus|evm.model.ctg022200_np12.29/A. integerrimus|evm.model.ctg028300_np12.15/A. integerrimus|evm.model.ctg021510_np12.2/A. integerrimus|evm.model.ctg020720_np12.8/A. in…	71
map05323	map05323	Rheumatoid arthritis	51/222	90/6832	5.26465140542677e-54	3.80809784992536e-52	2.75239669967926e-52	A. integerrimus|evm.model.ctg024980_np12.3/A. integerrimus|evm.model.ctg029200_np12.141/A. integerrimus|evm.model.ctg020000_np12.45/A. integerrimus|evm.model.ctg022200_np12.29/A. integerrimus|evm.model.ctg028300_np12.15/A. integerrimus|evm.model.ctg021510_np12.2/A. integerrimus|evm.model.ctg020720_np12.8/A. integerrimus|evm.model.ctg022890_np12.408/A. integerrimus|evm.model.ctg028290_np12.129/A. …	51
map04066	map04066	HIF-1 signaling pathway	59/222	137/6832	2.02555423459029e-53	1.09886317226523e-51	7.94230476194614e-52	A. integerrimus|evm.model.ctg019560_np12.94/A. integerrimus|evm.model.ctg011060_np12.12/A. integerrimus|evm.model.ctg008510_np12.131/A. integerrimus|evm.model.ctg007730_np12.16/A. integerrimus|evm.model.ctg005230_np12.2/A. integerrimus|evm.model.ctg020960_np12.126/A. integerrimus|evm.model.ctg003100_np12.62/A. integerrimus|evm.model.ctg024980_np12.3/A. integerrimus|evm.model.ctg029200_np12.141/A.…	59
map01521	map01521	EGFR tyrosine kinase inhibitor resistance	52/222	110/6832	1.47863645314663e-49	6.41728220665639e-48	4.63824908460733e-48	A. integerrimus|evm.model.ctg024980_np12.3/A. integerrimus|evm.model.ctg029200_np12.141/A. integerrimus|evm.model.ctg020000_np12.45/A. integerrimus|evm.model.ctg022200_np12.29/A. integerrimus|evm.model.ctg028300_np12.15/A. integerrimus|evm.model.ctg021510_np12.2/A. integerrimus|evm.model.ctg020720_np12.8/A. integerrimus|evm.model.ctg022890_np12.408/A. integerrimus|evm.model.ctg028290_np12.129/A. …	52
map04370	map04370	VEGF signaling pathway	51/222	106/6832	4.36009154193537e-49	1.35162837799997e-47	9.76922766538903e-48	A. integerrimus|evm.model.ctg024980_np12.3/A. integerrimus|evm.model.ctg029200_np12.141/A. integerrimus|evm.model.ctg020000_np12.45/A. integerrimus|evm.model.ctg022200_np12.29/A. integerrimus|evm.model.ctg028300_np12.15/A. integerrimus|evm.model.ctg021510_np12.2/A. integerrimus|evm.model.ctg020720_np12.8/A. integerrimus|evm.model.ctg022890_np12.408/A. integerrimus|evm.model.ctg028290_np12.129/A. …	51
map05230	map05230	Central carbon metabolism in cancer	51/222	106/6832	4.36009154193537e-49	1.35162837799997e-47	9.76922766538903e-48	A. integerrimus|evm.model.ctg024980_np12.3/A. integerrimus|evm.model.ctg029200_np12.141/A. integerrimus|evm.model.ctg020000_np12.45/A. integerrimus|evm.model.ctg022200_np12.29/A. integerrimus|evm.model.ctg028300_np12.15/A. integerrimus|evm.model.ctg021510_np12.2/A. integerrimus|evm.model.ctg020720_np12.8/A. integerrimus|evm.model.ctg022890_np12.408/A. integerrimus|evm.model.ctg028290_np12.129/A. …	51
map05218	map05218	Melanoma	48/222	91/6832	1.08256983538368e-48	2.93647067847824e-47	2.12240665094959e-47	A. integerrimus|evm.model.ctg020000_np12.45/A. integerrimus|evm.model.ctg022200_np12.29/A. integerrimus|evm.model.ctg028300_np12.15/A. integerrimus|evm.model.ctg021510_np12.2/A. integerrimus|evm.model.ctg020720_np12.8/A. integerrimus|evm.model.ctg022890_np12.408/A. integerrimus|evm.model.ctg028290_np12.129/A. integerrimus|evm.model.ctg024900_np12.15/A. integerrimus|evm.model.ctg028310_np12.8/A. i…	48
map05224	map05224	Breast cancer	54/222	148/6832	4.65856261048046e-44	1.12323120719362e-42	8.11843074808876e-43	A. integerrimus|evm.model.ctg020000_np12.45/A. integerrimus|evm.model.ctg022200_np12.29/A. integerrimus|evm.model.ctg028300_np12.15/A. integerrimus|evm.model.ctg021510_np12.2/A. integerrimus|evm.model.ctg020720_np12.8/A. integerrimus|evm.model.ctg022890_np12.408/A. integerrimus|evm.model.ctg028290_np12.129/A. integerrimus|evm.model.ctg024900_np12.15/A. integerrimus|evm.model.ctg028310_np12.8/A. i…	54
map05215	map05215	Prostate cancer	51/222	128/6832	7.35684680415472e-44	1.59643575650157e-42	1.15386334086216e-42	A. integerrimus|evm.model.ctg024980_np12.3/A. integerrimus|evm.model.ctg029200_np12.141/A. integerrimus|evm.model.ctg020000_np12.45/A. integerrimus|evm.model.ctg022200_np12.29/A. integerrimus|evm.model.ctg028300_np12.15/A. integerrimus|evm.model.ctg021510_np12.2/A. integerrimus|evm.model.ctg020720_np12.8/A. integerrimus|evm.model.ctg022890_np12.408/A. integerrimus|evm.model.ctg028290_np12.129/A. …	51
map04151	map04151	PI3K-Akt signaling pathway	67/222	261/6832	9.1017564969897e-44	1.79552832713342e-42	1.29776240961863e-42	A. integerrimus|evm.model.ctg029390_np12.3/A. integerrimus|evm.model.ctg025770_np12.2/A. integerrimus|evm.model.ctg023480_np12.1/A. integerrimus|evm.model.ctg029060_np12.92/A. integerrimus|evm.model.ctg015250_np12.214/A. integerrimus|evm.model.ctg019300_np12.32/A. integerrimus|evm.model.ctg019560_np12.94/A. integerrimus|evm.model.ctg011060_np12.12/A. integerrimus|evm.model.ctg008510_np12.131/A. i…	67
map04014	map04014	Ras signaling pathway	64/222	251/6832	1.71593680139735e-41	3.10298571586021e-40	2.24275950358075e-40	A. integerrimus|evm.model.ctg019560_np12.94/A. integerrimus|evm.model.ctg011060_np12.12/A. integerrimus|evm.model.ctg008510_np12.131/A. integerrimus|evm.model.ctg007730_np12.16/A. integerrimus|evm.model.ctg005230_np12.2/A. integerrimus|evm.model.ctg020960_np12.126/A. integerrimus|evm.model.ctg003100_np12.62/A. integerrimus|evm.model.ctg000610_np12.159/A. integerrimus|evm.model.ctg003140_np12.17/A…	64
map04015	map04015	Rap1 signaling pathway	61/222	226/6832	4.74979691517851e-41	7.92850715841337e-40	5.73052421345424e-40	A. integerrimus|evm.model.ctg019560_np12.94/A. integerrimus|evm.model.ctg011060_np12.12/A. integerrimus|evm.model.ctg008510_np12.131/A. integerrimus|evm.model.ctg007730_np12.16/A. integerrimus|evm.model.ctg005230_np12.2/A. integerrimus|evm.model.ctg020960_np12.126/A. integerrimus|evm.model.ctg003100_np12.62/A. integerrimus|evm.model.ctg000610_np12.159/A. integerrimus|evm.model.ctg003140_np12.17/A…	61
map04510	map04510	Focal adhesion	62/222	252/6832	4.10485852121383e-39	6.36253070788143e-38	4.59867608767564e-38	A. integerrimus|evm.model.ctg029390_np12.3/A. integerrimus|evm.model.ctg025770_np12.2/A. integerrimus|evm.model.ctg023480_np12.1/A. integerrimus|evm.model.ctg029060_np12.92/A. integerrimus|evm.model.ctg015250_np12.214/A. integerrimus|evm.model.ctg019300_np12.32/A. integerrimus|evm.model.ctg013720_np12.42/A. integerrimus|evm.model.ctg000610_np12.159/A. integerrimus|evm.model.ctg003140_np12.17/A. i…	62
map04550	map04550	Signaling pathways regulating pluripotency of stem cells	51/222	158/6832	1.95569027597617e-38	2.82923193257885e-37	2.04489720084525e-37	A. integerrimus|evm.model.ctg024980_np12.3/A. integerrimus|evm.model.ctg029200_np12.141/A. integerrimus|evm.model.ctg020000_np12.45/A. integerrimus|evm.model.ctg022200_np12.29/A. integerrimus|evm.model.ctg028300_np12.15/A. integerrimus|evm.model.ctg021510_np12.2/A. integerrimus|evm.model.ctg020720_np12.8/A. integerrimus|evm.model.ctg022890_np12.408/A. integerrimus|evm.model.ctg028290_np12.129/A. …	51
map05418	map05418	Fluid shear stress and atherosclerosis	54/222	192/6832	3.3797453896862e-37	4.5837796847619e-36	3.31303988857397e-36	A. integerrimus|evm.model.ctg000610_np12.159/A. integerrimus|evm.model.ctg003140_np12.17/A. integerrimus|evm.model.ctg024980_np12.3/A. integerrimus|evm.model.ctg029200_np12.141/A. integerrimus|evm.model.ctg020000_np12.45/A. integerrimus|evm.model.ctg022200_np12.29/A. integerrimus|evm.model.ctg028300_np12.15/A. integerrimus|evm.model.ctg021510_np12.2/A. integerrimus|evm.model.ctg020720_np12.8/A. i…	54
map04010	map04010	MAPK signaling pathway	62/222	284/6832	8.53106811997434e-36	1.0889657541379e-34	7.87076872988344e-35	A. integerrimus|evm.model.ctg019560_np12.94/A. integerrimus|evm.model.ctg011060_np12.12/A. integerrimus|evm.model.ctg008510_np12.131/A. integerrimus|evm.model.ctg007730_np12.16/A. integerrimus|evm.model.ctg005230_np12.2/A. integerrimus|evm.model.ctg020960_np12.126/A. integerrimus|evm.model.ctg003100_np12.62/A. integerrimus|evm.model.ctg024980_np12.3/A. integerrimus|evm.model.ctg029200_np12.141/A.…	62
map04520	map04520	Adherens junction	50/222	174/6832	7.08531198711268e-35	8.54173722890807e-34	6.17375138058357e-34	A. integerrimus|evm.model.ctg000610_np12.159/A. integerrimus|evm.model.ctg003140_np12.17/A. integerrimus|evm.model.ctg020000_np12.45/A. integerrimus|evm.model.ctg022200_np12.29/A. integerrimus|evm.model.ctg028300_np12.15/A. integerrimus|evm.model.ctg021510_np12.2/A. integerrimus|evm.model.ctg020720_np12.8/A. integerrimus|evm.model.ctg022890_np12.408/A. integerrimus|evm.model.ctg028290_np12.129/A.…	50
map05226	map05226	Gastric cancer	51/222	187/6832	2.42374845013792e-34	2.76817586147331e-33	2.00076741867341e-33	A. integerrimus|evm.model.ctg024980_np12.3/A. integerrimus|evm.model.ctg029200_np12.141/A. integerrimus|evm.model.ctg020000_np12.45/A. integerrimus|evm.model.ctg022200_np12.29/A. integerrimus|evm.model.ctg028300_np12.15/A. integerrimus|evm.model.ctg021510_np12.2/A. integerrimus|evm.model.ctg020720_np12.8/A. integerrimus|evm.model.ctg022890_np12.408/A. integerrimus|evm.model.ctg028290_np12.129/A. …	51
map04810	map04810	Regulation of actin cytoskeleton	55/222	229/6832	6.4477079953549e-34	6.99576317496006e-33	5.05636048056779e-33	A. integerrimus|evm.model.ctg000610_np12.159/A. integerrimus|evm.model.ctg003140_np12.17/A. integerrimus|evm.model.ctg024980_np12.3/A. integerrimus|evm.model.ctg029200_np12.141/A. integerrimus|evm.model.ctg020000_np12.45/A. integerrimus|evm.model.ctg022200_np12.29/A. integerrimus|evm.model.ctg028300_np12.15/A. integerrimus|evm.model.ctg021510_np12.2/A. integerrimus|evm.model.ctg020720_np12.8/A. i…	55
map05205	map05205	Proteoglycans in cancer	56/222	295/6832	8.33420914240523e-29	8.61201611381873e-28	6.22454717903949e-28	A. integerrimus|evm.model.ctg023550_np12.48/A. integerrimus|evm.model.ctg023080_np12.110/A. integerrimus|evm.model.ctg000610_np12.159/A. integerrimus|evm.model.ctg003140_np12.17/A. integerrimus|evm.model.ctg024980_np12.3/A. integerrimus|evm.model.ctg029200_np12.141/A. integerrimus|evm.model.ctg020000_np12.45/A. integerrimus|evm.model.ctg022200_np12.29/A. integerrimus|evm.model.ctg028300_np12.15/A…	56
map04144	map04144	Endocytosis	53/222	265/6832	2.1789842071889e-28	2.14927078618178e-27	1.55343850177582e-27	A. integerrimus|evm.model.ctg000610_np12.159/A. integerrimus|evm.model.ctg003140_np12.17/A. integerrimus|evm.model.ctg024980_np12.3/A. integerrimus|evm.model.ctg029200_np12.141/A. integerrimus|evm.model.ctg020000_np12.45/A. integerrimus|evm.model.ctg022200_np12.29/A. integerrimus|evm.model.ctg028300_np12.15/A. integerrimus|evm.model.ctg021510_np12.2/A. integerrimus|evm.model.ctg020720_np12.8/A. i…	53
map04714	map04714	Thermogenesis	51/222	249/6832	8.24211915035362e-28	7.77626024185537e-27	5.62048399726631e-27	A. integerrimus|evm.model.ctg020000_np12.45/A. integerrimus|evm.model.ctg022200_np12.29/A. integerrimus|evm.model.ctg028300_np12.15/A. integerrimus|evm.model.ctg021510_np12.2/A. integerrimus|evm.model.ctg020720_np12.8/A. integerrimus|evm.model.ctg022890_np12.408/A. integerrimus|evm.model.ctg028290_np12.129/A. integerrimus|evm.model.ctg024900_np12.15/A. integerrimus|evm.model.ctg028310_np12.8/A. i…	51
map05200	map05200	Pathways in cancer	62/222	413/6832	4.69839900891566e-26	4.24813577056124e-25	3.07044496635278e-25	A. integerrimus|evm.model.ctg000610_np12.159/A. integerrimus|evm.model.ctg003140_np12.17/A. integerrimus|evm.model.ctg024980_np12.3/A. integerrimus|evm.model.ctg029200_np12.141/A. integerrimus|evm.model.ctg020000_np12.45/A. integerrimus|evm.model.ctg022200_np12.29/A. integerrimus|evm.model.ctg028300_np12.15/A. integerrimus|evm.model.ctg021510_np12.2/A. integerrimus|evm.model.ctg020720_np12.8/A. i…	62
map05322	map05322	Systemic lupus erythematosus	18/222	51/6832	8.86360012916336e-15	7.6936049121138e-14	5.56074281787512e-14	A. integerrimus|evm.model.ctg028010_np12.142/A. integerrimus|evm.model.ctg023650_np12.17/A. integerrimus|evm.model.ctg028010_np12.211/A. integerrimus|evm.model.ctg023650_np12.23/A. integerrimus|evm.model.ctg028010_np12.191/A. integerrimus|evm.model.ctg028010_np12.183/A. integerrimus|evm.model.ctg028010_np12.225/A. integerrimus|evm.model.ctg028010_np12.154/A. integerrimus|evm.model.ctg023650_np12.…	18
map00591	map00591	Linoleic acid metabolism	21/222	77/6832	1.74765277190902e-14	1.45861789040099e-13	1.05425207698156e-13	A. integerrimus|evm.model.ctg029530_np12.75/A. integerrimus|evm.model.ctg026370_np12.38/A. integerrimus|evm.model.ctg029530_np12.95/A. integerrimus|evm.model.ctg026930_np12.37/A. integerrimus|evm.model.ctg024120_np12.41/A. integerrimus|evm.model.ctg009140_np12.85/A. integerrimus|evm.model.ctg023440_np12.16/A. integerrimus|evm.model.ctg024760_np12.37/A. integerrimus|evm.model.ctg009140_np12.87/A. …	21
map04913	map04913	Ovarian steroidogenesis	21/222	99/6832	3.74983598674819e-12	3.01375707083095e-11	2.17826729834495e-11	A. integerrimus|evm.model.ctg005770_np12.185/A. integerrimus|evm.model.ctg029530_np12.75/A. integerrimus|evm.model.ctg026370_np12.38/A. integerrimus|evm.model.ctg029530_np12.95/A. integerrimus|evm.model.ctg026930_np12.37/A. integerrimus|evm.model.ctg024120_np12.41/A. integerrimus|evm.model.ctg009140_np12.85/A. integerrimus|evm.model.ctg023440_np12.16/A. integerrimus|evm.model.ctg024760_np12.37/A.…	21
map00590	map00590	Arachidonic acid metabolism	21/222	107/6832	1.83026007660784e-11	1.41845155937108e-10	1.02522086997958e-10	A. integerrimus|evm.model.ctg029530_np12.75/A. integerrimus|evm.model.ctg026370_np12.38/A. integerrimus|evm.model.ctg029530_np12.95/A. integerrimus|evm.model.ctg026930_np12.37/A. integerrimus|evm.model.ctg024120_np12.41/A. integerrimus|evm.model.ctg009140_np12.85/A. integerrimus|evm.model.ctg023440_np12.16/A. integerrimus|evm.model.ctg024760_np12.37/A. integerrimus|evm.model.ctg009140_np12.87/A. …	21
map00981	map00981	Insect hormone biosynthesis	16/222	60/6832	3.7952082726375e-11	2.8398627419391e-10	2.0525808806642e-10	A. integerrimus|evm.model.ctg008780_np12.43/A. integerrimus|evm.model.ctg022280_np12.256/A. integerrimus|evm.model.ctg007360_np12.91/A. integerrimus|evm.model.ctg000610_np12.159/A. integerrimus|evm.model.ctg003140_np12.17/A. integerrimus|evm.model.ctg007680_np12.1/A. integerrimus|evm.model.ctg007680_np12.8/A. integerrimus|evm.model.ctg007680_np12.10/A. integerrimus|evm.model.ctg007680_np12.4/A. i…	16
map04750	map04750	Inflammatory mediator regulation of TRP channels	23/222	135/6832	4.05911611345909e-11	2.93609398873541e-10	2.12213438914177e-10	A. integerrimus|evm.model.ctg005070_np12.127/A. integerrimus|evm.model.ctg005770_np12.185/A. integerrimus|evm.model.ctg029530_np12.75/A. integerrimus|evm.model.ctg026370_np12.38/A. integerrimus|evm.model.ctg029530_np12.95/A. integerrimus|evm.model.ctg026930_np12.37/A. integerrimus|evm.model.ctg024120_np12.41/A. integerrimus|evm.model.ctg009140_np12.85/A. integerrimus|evm.model.ctg023440_np12.16/A…	23
map04726	map04726	Serotonergic synapse	24/222	175/6832	1.56145353368556e-09	1.09301747357989e-08	7.90005353205939e-09	A. integerrimus|evm.model.ctg005770_np12.185/A. integerrimus|evm.model.ctg029530_np12.75/A. integerrimus|evm.model.ctg026370_np12.38/A. integerrimus|evm.model.ctg029530_np12.95/A. integerrimus|evm.model.ctg026930_np12.37/A. integerrimus|evm.model.ctg024120_np12.41/A. integerrimus|evm.model.ctg009140_np12.85/A. integerrimus|evm.model.ctg023440_np12.16/A. integerrimus|evm.model.ctg024760_np12.37/A.…	24
map04212	map04212	Longevity regulating pathway - worm	19/222	130/6832	3.03099541002999e-08	2.05539376242659e-07	1.48558656610023e-07	A. integerrimus|evm.model.ctg029530_np12.75/A. integerrimus|evm.model.ctg026370_np12.38/A. integerrimus|evm.model.ctg029530_np12.95/A. integerrimus|evm.model.ctg026930_np12.37/A. integerrimus|evm.model.ctg024120_np12.41/A. integerrimus|evm.model.ctg009140_np12.85/A. integerrimus|evm.model.ctg023440_np12.16/A. integerrimus|evm.model.ctg024760_np12.37/A. integerrimus|evm.model.ctg009140_np12.87/A. …	19
map00900	map00900	Terpenoid backbone biosynthesis	11/222	40/6832	3.35797440742555e-08	2.20812256488286e-07	1.59597507721342e-07	A. integerrimus|evm.model.ctg007680_np12.1/A. integerrimus|evm.model.ctg007680_np12.8/A. integerrimus|evm.model.ctg007680_np12.10/A. integerrimus|evm.model.ctg007680_np12.4/A. integerrimus|evm.model.ctg026410_np12.4/A. integerrimus|evm.model.ctg007680_np12.2/A. integerrimus|evm.model.ctg003180_np12.235/A. integerrimus|evm.model.ctg003180_np12.146/A. integerrimus|evm.model.ctg002390_np12.39/A. int…	11
map05034	map05034	Alcoholism	18/222	131/6832	1.87039965431559e-07	1.19375507348965e-06	8.62815939606881e-07	A. integerrimus|evm.model.ctg028010_np12.142/A. integerrimus|evm.model.ctg023650_np12.17/A. integerrimus|evm.model.ctg028010_np12.211/A. integerrimus|evm.model.ctg023650_np12.23/A. integerrimus|evm.model.ctg028010_np12.191/A. integerrimus|evm.model.ctg028010_np12.183/A. integerrimus|evm.model.ctg028010_np12.225/A. integerrimus|evm.model.ctg028010_np12.154/A. integerrimus|evm.model.ctg023650_np12.…	18
map00330	map00330	Arginine and proline metabolism	11/222	60/6832	2.80567347740404e-06	1.7395175559905e-05	1.25727924250587e-05	A. integerrimus|evm.model.ctg023320_np12.10/A. integerrimus|evm.model.ctg008780_np12.43/A. integerrimus|evm.model.ctg022280_np12.256/A. integerrimus|evm.model.ctg007360_np12.91/A. integerrimus|evm.model.ctg007940_np12.126/A. integerrimus|evm.model.ctg000610_np12.159/A. integerrimus|evm.model.ctg003140_np12.17/A. integerrimus|evm.model.ctg003140_np12.6/A. integerrimus|evm.model.ctg026760_np12.232/…	11
map00250	map00250	Alanine, aspartate and glutamate metabolism	9/222	46/6832	1.32678937474907e-05	7.99759150890413e-05	5.7804566326787e-05	A. integerrimus|evm.model.ctg007160_np12.10/A. integerrimus|evm.model.ctg003140_np12.6/A. integerrimus|evm.model.ctg005460_np12.35/A. integerrimus|evm.model.ctg000210_np12.3/A. integerrimus|evm.model.ctg017800_np12.453/A. integerrimus|evm.model.ctg027970_np12.90/A. integerrimus|evm.model.ctg015770_np12.38/A. integerrimus|evm.model.ctg007670_np12.406/A. integerrimus|evm.model.ctg016140_np12.8	9
map00340	map00340	Histidine metabolism	7/222	29/6832	2.9493350094392e-05	0.000172974512715758	0.00012502159783967	A. integerrimus|evm.model.ctg023320_np12.10/A. integerrimus|evm.model.ctg008780_np12.43/A. integerrimus|evm.model.ctg022280_np12.256/A. integerrimus|evm.model.ctg007360_np12.91/A. integerrimus|evm.model.ctg007940_np12.126/A. integerrimus|evm.model.ctg000610_np12.159/A. integerrimus|evm.model.ctg003140_np12.17	7
map00410	map00410	beta-Alanine metabolism	8/222	40/6832	3.43078341992305e-05	0.000195915790032448	0.00014160297217965	A. integerrimus|evm.model.ctg023320_np12.10/A. integerrimus|evm.model.ctg008780_np12.43/A. integerrimus|evm.model.ctg022280_np12.256/A. integerrimus|evm.model.ctg007360_np12.91/A. integerrimus|evm.model.ctg007940_np12.126/A. integerrimus|evm.model.ctg006940_np12.17/A. integerrimus|evm.model.ctg000610_np12.159/A. integerrimus|evm.model.ctg003140_np12.17	8
map01130	map01130	map01130	21/222	257/6832	8.34499656423221e-05	0.000464324167804715	0.000335601751166154	A. integerrimus|evm.model.ctg023320_np12.10/A. integerrimus|evm.model.ctg008780_np12.43/A. integerrimus|evm.model.ctg022280_np12.256/A. integerrimus|evm.model.ctg007360_np12.91/A. integerrimus|evm.model.ctg007940_np12.126/A. integerrimus|evm.model.ctg000610_np12.159/A. integerrimus|evm.model.ctg003140_np12.17/A. integerrimus|evm.model.ctg007680_np12.1/A. integerrimus|evm.model.ctg007680_np12.8/A.…	21
map00561	map00561	Glycerolipid metabolism	10/222	72/6832	9.82782810258725e-05	0.000533159674565358	0.000385354312443553	A. integerrimus|evm.model.ctg023320_np12.10/A. integerrimus|evm.model.ctg008780_np12.43/A. integerrimus|evm.model.ctg022280_np12.256/A. integerrimus|evm.model.ctg007360_np12.91/A. integerrimus|evm.model.ctg007940_np12.126/A. integerrimus|evm.model.ctg000610_np12.159/A. integerrimus|evm.model.ctg003140_np12.17/A. integerrimus|evm.model.ctg022760_np12.8/A. integerrimus|evm.model.ctg027660_np12.422/…	10
map00620	map00620	Pyruvate metabolism	7/222	43/6832	0.000413398197078681	0.00218798557966034	0.00158142057419059	A. integerrimus|evm.model.ctg023320_np12.10/A. integerrimus|evm.model.ctg008780_np12.43/A. integerrimus|evm.model.ctg022280_np12.256/A. integerrimus|evm.model.ctg007360_np12.91/A. integerrimus|evm.model.ctg007940_np12.126/A. integerrimus|evm.model.ctg000610_np12.159/A. integerrimus|evm.model.ctg003140_np12.17	7
map00280	map00280	Valine, leucine and isoleucine degradation	8/222	57/6832	0.000458235059320259	0.002367547806488	0.00171120360498042	A. integerrimus|evm.model.ctg023320_np12.10/A. integerrimus|evm.model.ctg008780_np12.43/A. integerrimus|evm.model.ctg022280_np12.256/A. integerrimus|evm.model.ctg007360_np12.91/A. integerrimus|evm.model.ctg007940_np12.126/A. integerrimus|evm.model.ctg006940_np12.17/A. integerrimus|evm.model.ctg000610_np12.159/A. integerrimus|evm.model.ctg003140_np12.17	8
map04064	map04064	NF-kappa B signaling pathway	7/222	45/6832	0.00055093460239912	0.00278029787722346	0.0020095289047116	A. integerrimus|evm.model.ctg005370_np12.27/A. integerrimus|evm.model.ctg022900_np12.23/A. integerrimus|evm.model.ctg005130_np12.94/A. integerrimus|evm.model.ctg022900_np12.7/A. integerrimus|evm.model.ctg022900_np12.11/A. integerrimus|evm.model.ctg022900_np12.20/A. integerrimus|evm.model.ctg022900_np12.6	7
map05203	map05203	Viral carcinogenesis	15/222	182/6832	0.00080718501717377	0.00398088974378882	0.00287728630523665	A. integerrimus|evm.model.ctg000610_np12.159/A. integerrimus|evm.model.ctg003140_np12.17/A. integerrimus|evm.model.ctg005770_np12.185/A. integerrimus|evm.model.ctg028010_np12.142/A. integerrimus|evm.model.ctg023650_np12.17/A. integerrimus|evm.model.ctg028010_np12.211/A. integerrimus|evm.model.ctg028010_np12.191/A. integerrimus|evm.model.ctg028010_np12.183/A. integerrimus|evm.model.ctg028010_np12.…	15
map01522	map01522	Endocrine resistance	9/222	78/6832	0.000890966259654217	0.00429643729655478	0.0031053560862802	A. integerrimus|evm.model.ctg003490_np12.86/A. integerrimus|evm.model.ctg005770_np12.185/A. integerrimus|evm.model.ctg013450_np12.21/A. integerrimus|evm.model.ctg021730_np12.200/A. integerrimus|evm.model.ctg026760_np12.358/A. integerrimus|evm.model.ctg008950_np12.101/A. integerrimus|evm.model.ctg007670_np12.69/A. integerrimus|evm.model.ctg009140_np12.91/A. integerrimus|evm.model.ctg000970_np12.5	9
map00010	map00010	Glycolysis / Gluconeogenesis	7/222	53/6832	0.00150168863797996	0.0070028282149202	0.0050614669125545	A. integerrimus|evm.model.ctg023320_np12.10/A. integerrimus|evm.model.ctg008780_np12.43/A. integerrimus|evm.model.ctg022280_np12.256/A. integerrimus|evm.model.ctg007360_np12.91/A. integerrimus|evm.model.ctg007940_np12.126/A. integerrimus|evm.model.ctg000610_np12.159/A. integerrimus|evm.model.ctg003140_np12.17	7
map05206	map05206	MicroRNAs in cancer	17/222	234/6832	0.00151674159493663	0.0070028282149202	0.0050614669125545	A. integerrimus|evm.model.ctg022900_np12.23/A. integerrimus|evm.model.ctg029390_np12.3/A. integerrimus|evm.model.ctg025770_np12.2/A. integerrimus|evm.model.ctg023480_np12.1/A. integerrimus|evm.model.ctg029060_np12.92/A. integerrimus|evm.model.ctg015250_np12.214/A. integerrimus|evm.model.ctg019300_np12.32/A. integerrimus|evm.model.ctg013720_np12.42/A. integerrimus|evm.model.ctg000610_np12.159/A. i…	17
map00220	map00220	Arginine biosynthesis	5/222	27/6832	0.00155731817041581	0.00704037589542147	0.00508860542526218	A. integerrimus|evm.model.ctg017800_np12.453/A. integerrimus|evm.model.ctg027970_np12.90/A. integerrimus|evm.model.ctg015770_np12.38/A. integerrimus|evm.model.ctg007670_np12.406/A. integerrimus|evm.model.ctg016140_np12.8	5
map00051	map00051	Fructose and mannose metabolism	7/222	55/6832	0.00187135201701737	0.00828741607536262	0.00598993449056042	A. integerrimus|evm.model.ctg029560_np12.14/A. integerrimus|evm.model.ctg029560_np12.16/A. integerrimus|evm.model.ctg016790_np12.183/A. integerrimus|evm.model.ctg016790_np12.182/A. integerrimus|evm.model.ctg016790_np12.179/A. integerrimus|evm.model.ctg016790_np12.181/A. integerrimus|evm.model.ctg016790_np12.184	7
map01230	map01230	Biosynthesis of amino acids	8/222	72/6832	0.00218689182225612	0.00934193854171335	0.00675211662728736	A. integerrimus|evm.model.ctg017800_np12.453/A. integerrimus|evm.model.ctg027970_np12.90/A. integerrimus|evm.model.ctg015770_np12.38/A. integerrimus|evm.model.ctg026760_np12.232/A. integerrimus|evm.model.ctg004800_np12.240/A. integerrimus|evm.model.ctg008310_np12.106/A. integerrimus|evm.model.ctg007670_np12.406/A. integerrimus|evm.model.ctg016140_np12.8	8
map01120	map01120	Microbial metabolism in diverse environments	15/222	201/6832	0.00219557080934277	0.00934193854171335	0.00675211662728736	A. integerrimus|evm.model.ctg023320_np12.10/A. integerrimus|evm.model.ctg007160_np12.10/A. integerrimus|evm.model.ctg008780_np12.43/A. integerrimus|evm.model.ctg022280_np12.256/A. integerrimus|evm.model.ctg007360_np12.91/A. integerrimus|evm.model.ctg007940_np12.126/A. integerrimus|evm.model.ctg000610_np12.159/A. integerrimus|evm.model.ctg003140_np12.17/A. integerrimus|evm.model.ctg005460_np12.35/…	15
map05165	map05165	Human papillomavirus infection	17/222	252/6832	0.00332324943516205	0.0138681755275032	0.0100235661101042	A. integerrimus|evm.model.ctg022900_np12.23/A. integerrimus|evm.model.ctg029390_np12.3/A. integerrimus|evm.model.ctg025770_np12.2/A. integerrimus|evm.model.ctg023480_np12.1/A. integerrimus|evm.model.ctg029060_np12.92/A. integerrimus|evm.model.ctg015250_np12.214/A. integerrimus|evm.model.ctg019300_np12.32/A. integerrimus|evm.model.ctg013720_np12.42/A. integerrimus|evm.model.ctg005770_np12.185/A. i…	17
map00380	map00380	Tryptophan metabolism	7/222	61/6832	0.00341334094119732	0.0139753770611287	0.0101010486641192	A. integerrimus|evm.model.ctg023320_np12.10/A. integerrimus|evm.model.ctg008780_np12.43/A. integerrimus|evm.model.ctg022280_np12.256/A. integerrimus|evm.model.ctg007360_np12.91/A. integerrimus|evm.model.ctg007940_np12.126/A. integerrimus|evm.model.ctg000610_np12.159/A. integerrimus|evm.model.ctg003140_np12.17	7
map00053	map00053	Ascorbate and aldarate metabolism	9/222	100/6832	0.00502145798113292	0.0200114723769093	0.0144637855161751	A. integerrimus|evm.model.ctg027370_np12.154/A. integerrimus|evm.model.ctg023320_np12.10/A. integerrimus|evm.model.ctg008780_np12.43/A. integerrimus|evm.model.ctg022280_np12.256/A. integerrimus|evm.model.ctg007360_np12.91/A. integerrimus|evm.model.ctg007940_np12.126/A. integerrimus|evm.model.ctg000610_np12.159/A. integerrimus|evm.model.ctg003140_np12.17/A. integerrimus|evm.model.ctg014950_np12.131	9
map04658	map04658	Th1 and Th2 cell differentiation	5/222	35/6832	0.00507203216926273	0.0200114723769093	0.0144637855161751	A. integerrimus|evm.model.ctg013450_np12.21/A. integerrimus|evm.model.ctg021730_np12.200/A. integerrimus|evm.model.ctg026760_np12.358/A. integerrimus|evm.model.ctg008950_np12.101/A. integerrimus|evm.model.ctg007670_np12.69	5
map00982	map00982	Drug metabolism - cytochrome P450	10/222	126/6832	0.00769111366994329	0.0298030654710302	0.0215409010680743	A. integerrimus|evm.model.ctg027370_np12.154/A. integerrimus|evm.model.ctg000610_np12.159/A. integerrimus|evm.model.ctg003140_np12.17/A. integerrimus|evm.model.ctg009140_np12.91/A. integerrimus|evm.model.ctg021570_np12.11/A. integerrimus|evm.model.ctg021840_np12.6/A. integerrimus|evm.model.ctg000970_np12.5/A. integerrimus|evm.model.ctg014950_np12.131/A. integerrimus|evm.model.ctg014660_np12.224/A…	10
map00040	map00040	Pentose and glucuronate interconversions	9/222	111/6832	0.00982115405708318	0.037389305796264	0.0270240434811707	A. integerrimus|evm.model.ctg027370_np12.154/A. integerrimus|evm.model.ctg029560_np12.14/A. integerrimus|evm.model.ctg029560_np12.16/A. integerrimus|evm.model.ctg016790_np12.183/A. integerrimus|evm.model.ctg016790_np12.182/A. integerrimus|evm.model.ctg016790_np12.179/A. integerrimus|evm.model.ctg016790_np12.181/A. integerrimus|evm.model.ctg016790_np12.184/A. integerrimus|evm.model.ctg014950_np12.…	9
map00980	map00980	Metabolism of xenobiotics by cytochrome P450	10/222	133/6832	0.0110731598428359	0.0414288911361273	0.0299437534769972	A. integerrimus|evm.model.ctg027370_np12.154/A. integerrimus|evm.model.ctg000610_np12.159/A. integerrimus|evm.model.ctg003140_np12.17/A. integerrimus|evm.model.ctg009140_np12.91/A. integerrimus|evm.model.ctg021570_np12.11/A. integerrimus|evm.model.ctg021840_np12.6/A. integerrimus|evm.model.ctg000970_np12.5/A. integerrimus|evm.model.ctg014950_np12.131/A. integerrimus|evm.model.ctg014660_np12.224/A…	10
