# Supplementary material for: Phylogenomics of crabs provides insights into their origin and evolution
Source: Research Square preprint supplement (doi:10.21203/rs.3.rs-5612812/v1), 2025-01-10
Supplement: Supplementary file 4 [file c22b65a8f5308144cea4ee3e.xlsx]

## Sheet: Sheet1
Supplementary Table S64:Comprehensive phylogeney construction treefile
RBBH_RCFV.genesortR_400genes	(P. monodon:0.2665820697,(((((((((((((C. sapidus:0.1978601681,P. trituberculatus:0.1508494279)100:0.0342900491,S. paramamosain:0.5086817453)100:0.1327073986,C. philargius:0.3116692160)96:0.0314172918,D. horrida:0.2894857472)96:0.0323034810,A. integerrimus:0.2634369462)100:0.0297212165,C. opilio:0.5601459300)100:0.0675948839,((E. j. sinensis_SA:0.2243444678,C. carnifex:0.1944450304)100:0.099839512…
RBBH_av_patristic.genesortR_400genes	(P. monodon:0.2351609992,(((((((((((((C. sapidus:0.1821055016,P. trituberculatus:0.1446320630)100:0.0286366109,S. paramamosain:0.4409825794)100:0.1515485924,C. philargius:0.3086387729)100:0.0313037815,D. horrida:0.2941021185)100:0.0360886553,A. integerrimus:0.2630915611)100:0.0310787585,C. opilio:0.5562533368)100:0.0732623050,((E. j. sinensis_SA:0.2135582480,C. carnifex:0.1835101897)100:0.1058839…
RBBH_average_BS_support.genesortR_400genes	(P. monodon:0.1325277241,((((((((((((C. sapidus:0.1118955289,P. trituberculatus:0.0776033683)100:0.0209411697,S. paramamosain:0.1970269665)100:0.1065534511,(D. horrida:0.1427382419,C. philargius:0.1867315874)100:0.0178552890)100:0.0246191089,A. integerrimus:0.1540543152)100:0.0153649166,C. opilio:0.3162389816)100:0.0544914249,((E. j. sinensis_SA:0.1236342508,C. carnifex:0.0944266182)100:0.0710591…
RBBH_default.genesortR_400genes	(P. monodon:0.0769013381,(((((((((((((C. sapidus:0.0683642632,P. trituberculatus:0.0490019244)100:0.0147066811,S. paramamosain:0.1609256814)100:0.0672714920,C. philargius:0.1160447062)100:0.0096462750,D. horrida:0.1025568378)100:0.0152198717,A. integerrimus:0.0994215861)100:0.0107221766,C. opilio:0.1879610417)100:0.0382425335,((E. j. sinensis_SA:0.0743350788,C. carnifex:0.0589992325)100:0.0435368…
RBBH_missing.genesortR_400genes	(P. monodon:0.0861209048,(((((((((((((C. sapidus:0.0784939886,P. trituberculatus:0.0519500277)100:0.0158231440,S. paramamosain:0.1824138680)100:0.0686178531,C. philargius:0.1296600006)99:0.0101834476,D. horrida:0.1099593461)100:0.0159951364,A. integerrimus:0.1087959875)52:0.0083442224,C. opilio:0.2188129663)100:0.0406357565,((E. j. sinensis_SA:0.0841850717,C. carnifex:0.0678285551)100:0.047748962…
RBBH_saturation.genesortR_400genes	(P. monodon:0.2108693371,(((((((((((((C. sapidus:0.1842861963,P. trituberculatus:0.1418417416)78:0.0241444410,S. paramamosain:0.4594447124)100:0.1484716873,C. philargius:0.2847365932)100:0.0240549075,D. horrida:0.2676206234)100:0.0311655387,A. integerrimus:0.2552897868)100:0.0315223772,C. opilio:0.4686519583)100:0.0746921869,((E. j. sinensis_SA:0.1804994354,C. carnifex:0.1799426034)100:0.09499810…
RBBH_variable_sites.genesortR_400genes	(P. monodon:0.2192165063,(((((((((((((C. sapidus:0.1386947889,P. trituberculatus:0.0941361587)100:0.0222971350,S. paramamosain:0.2559855823)100:0.1190222347,C. philargius:0.2294725984)99:0.0162657580,D. horrida:0.1980376173)100:0.0239292828,A. integerrimus:0.1922788370)93:0.0169263364,C. opilio:0.3855429896)100:0.0596802817,((E. j. sinensis_SA:0.1620315041,C. carnifex:0.1262464712)100:0.081037710…
busco.RCFV.genesortR_400genes	(P. monodon:0.0340138174,((((((((((((C. sapidus:0.0739943818,S. paramamosain:0.1439863164)80:0.0142254638,P. trituberculatus:0.0644219237)100:0.0687934723,C. philargius:0.1253492168)52:0.0086581139,(C. opilio:0.2231172169,D. horrida:0.1053238419)52:0.0133483055)73:0.0109979697,A. integerrimus:0.1007816425)100:0.0328188729,((E. j. sinensis_SA:0.0753269190,C. carnifex:0.0745565309)100:0.0477682212,…
busco.av_patristic.genesortR_400genes	(P. monodon:0.0326408753,(((((((((((((C. sapidus:0.0701727671,P. trituberculatus:0.0552238079)91:0.0140039029,S. paramamosain:0.1300829620)100:0.0524883608,C. opilio:0.2211691689)90:0.0129605955,D. horrida:0.1081599275)70:0.0089586223,C. philargius:0.1209812635)91:0.0104013489,A. integerrimus:0.1025686092)100:0.0307657868,((E. j. sinensis_SA:0.0727682889,C. carnifex:0.0637719518)100:0.0448870748,…
busco.average_BS_support.genesortR_400genes	(P. monodon:0.0243932276,((((((((((((C. sapidus:0.0547418771,P. trituberculatus:0.0441264953)100:0.0111947942,S. paramamosain:0.1089797992)100:0.0422022029,C. opilio:0.1688881767)82:0.0101270981,(D. horrida:0.0841754099,C. philargius:0.0973170358)100:0.0077876422)83:0.0087628632,A. integerrimus:0.0914965050)100:0.0273185832,((E. j. sinensis_SA:0.0584902044,C. carnifex:0.0504323210)100:0.034854480…
busco.default.genesortR_400genes	(P. monodon:0.0212007350,((((((((((((C. sapidus:0.0423248772,P. trituberculatus:0.0371872057)100:0.0108607780,S. paramamosain:0.0979974367)100:0.0442560722,(D. horrida:0.0779444156,C. philargius:0.0901839968)98:0.0072067012)100:0.0075587021,A. integerrimus:0.0819906680)72:0.0040522021,C. opilio:0.1359621714)100:0.0251269437,((E. j. sinensis_SA:0.0522843935,C. carnifex:0.0434957708)100:0.031895734…
busco.missing.genesortR_400genes	(P. monodon:0.0169947815,((((((((((((C. sapidus:0.0379283715,P. trituberculatus:0.0312386524)100:0.0092201729,S. paramamosain:0.0928535395)100:0.0351347332,(D. horrida:0.0659662287,C. philargius:0.0711908741)54:0.0060158816)93:0.0058293111,A. integerrimus:0.0647575780)81:0.0038361775,C. opilio:0.1177384887)100:0.0199865682,((E. j. sinensis_SA:0.0440869624,C. carnifex:0.0398349392)100:0.0230993371…
busco.saturation.genesortR_400genes	(P. monodon:0.0325153964,(((((((((((((C. sapidus:0.0662525693,P. trituberculatus:0.0529775201)79:0.0128859087,S. paramamosain:0.1286951732)100:0.0485893205,C. opilio:0.2111662017)79:0.0125724266,D. horrida:0.0975382075)53:0.0085194345,C. philargius:0.1137638745)83:0.0101158187,A. integerrimus:0.0994219959)100:0.0298609192,((E. j. sinensis_SA:0.0685397070,C. carnifex:0.0591322068)100:0.0421544676,…
busco.variable_sites.genesortR_400genes	(P. monodon:0.0345789667,(((((((((((((C. sapidus:0.0705297528,P. trituberculatus:0.0540747851)59:0.0131900929,S. paramamosain:0.1389201443)100:0.0506863507,C. opilio:0.2104706664)59:0.0121808431,D. horrida:0.1047308054)47:0.0083298650,C. philargius:0.1171952322)61:0.0096789684,A. integerrimus:0.0997512174)100:0.0300002266,((E. j. sinensis_SA:0.0696993023,C. carnifex:0.0625417925)100:0.0433785152,…
busco_JTT+F+C20+G.pmsf.constrain	(P. monodon:0.0249371219,(((((((((((((C. sapidus:0.0547191330,P. trituberculatus:0.0435996471)100:0.0089630496,S. paramamosain:0.1277748870)100:0.0432951946,C. philargius:0.0942975116)73:0.0049980346,D. horrida:0.0858443219)100:0.0067967445,A. integerrimus:0.0851811656)90:0.0029053095,C. opilio:0.1720486356)100:0.0254234199,((E. j. sinensis_SA:0.0545730716,C. carnifex:0.0505027320)100:0.033031560…
busco_JTT+F+C20+G.pmsf	(P. monodon:0.0249384520,((((((((((((C. sapidus:0.0546442949,P. trituberculatus:0.0436798888)100:0.0090270181,S. paramamosain:0.1276900967)100:0.0445733382,(D. horrida:0.0838271298,C. philargius:0.0931549190)99:0.0057064549)100:0.0073880313,A. integerrimus:0.0857605838)84:0.0028820671,C. opilio:0.1721119056)100:0.0253147364,((E. j. sinensis_SA:0.0544938218,C. carnifex:0.0505736341)100:0.033008190…
busco_JTT+F+C20+G	(P. monodon:0.0269027898,((((((((((((C. sapidus:0.0588624588,P. trituberculatus:0.0472208420)100:0.0100504926,S. paramamosain:0.1370607867)100:0.0479898750,(D. horrida:0.0903667911,C. philargius:0.1003268760)86:0.0066117770)99:0.0081202978,A. integerrimus:0.0926361608)84:0.0034453481,C. opilio:0.1846039434)100:0.0271350066,((E. j. sinensis_SA:0.0588641075,C. carnifex:0.0546066992)100:0.0356132126…
busco_JTT+F+C60+G.pmsf.constrain	(P. monodon:0.0249285241,(((((((((((((C. sapidus:0.0548743432,P. trituberculatus:0.0436518058)100:0.0087788706,S. paramamosain:0.1287327558)100:0.0436284123,C. philargius:0.0947419977)75:0.0047424347,D. horrida:0.0861749773)100:0.0067214450,A. integerrimus:0.0855947767)91:0.0026748328,C. opilio:0.1734230512)100:0.0257754716,((E. j. sinensis_SA:0.0546794136,C. carnifex:0.0506275534)100:0.033176874…
busco_JTT+F+C60+G.pmsf	(P. monodon:0.0249298280,((((((((((((C. sapidus:0.0548063579,P. trituberculatus:0.0437242412)100:0.0088348561,S. paramamosain:0.1286492772)100:0.0448404818,(D. horrida:0.0842283909,C. philargius:0.0935873113)100:0.0054611535)100:0.0072955582,A. integerrimus:0.0861494990)85:0.0026644615,C. opilio:0.1735117274)100:0.0256662093,((E. j. sinensis_SA:0.0546066390,C. carnifex:0.0506934059)100:0.03316926…
busco_JTT+F+C60+G	(P. monodon:0.0269373401,((((((((((((C. sapidus:0.0591224294,P. trituberculatus:0.0473579595)100:0.0099297336,S. paramamosain:0.1382307030)100:0.0483147905,(D. horrida:0.0909444284,C. philargius:0.1009769104)86:0.0064354551)99:0.0080777975,A. integerrimus:0.0931701396)77:0.0032758559,C. opilio:0.1862363936)100:0.0274626193,((E. j. sinensis_SA:0.0590731543,C. carnifex:0.0548573022)100:0.0358593189…
busco_LG+F+C20+G.pmsf.constrain	(P. monodon:0.0254154857,(((((((((((((C. sapidus:0.0561397862,P. trituberculatus:0.0447987909)100:0.0095475465,S. paramamosain:0.1309955769)100:0.0436121856,C. philargius:0.0972684563)71:0.0055459609,D. horrida:0.0886967761)100:0.0070271985,A. integerrimus:0.0879880653)94:0.0032400386,C. opilio:0.1772417414)100:0.0254639509,((E. j. sinensis_SA:0.0562814579,C. carnifex:0.0524097001)100:0.033709771…
busco_LG+F+C20+G.pmsf	(P. monodon:0.0254177001,((((((((((((C. sapidus:0.0560445806,P. trituberculatus:0.0449166582)100:0.0096283562,S. paramamosain:0.1309054606)100:0.0450043222,(D. horrida:0.0864301523,C. philargius:0.0959574047)99:0.0063556739)100:0.0076921672,A. integerrimus:0.0886244804)92:0.0031839827,C. opilio:0.1773035724)100:0.0253775847,((E. j. sinensis_SA:0.0561768286,C. carnifex:0.0525094248)100:0.033695455…
busco_LG+F+C20+G	(P. monodon:0.0274183366,((((((((((((C. sapidus:0.0603732434,P. trituberculatus:0.0485549369)100:0.0106683271,S. paramamosain:0.1405345068)100:0.0484855997,(D. horrida:0.0931613209,C. philargius:0.1033504729)87:0.0072983135)99:0.0084495881,A. integerrimus:0.0957372416)86:0.0037669236,C. opilio:0.1901832677)100:0.0272529281,((E. j. sinensis_SA:0.0606654344,C. carnifex:0.0566933473)100:0.0363531858…
busco_LG+F+C60+G.pmsf.constrain	(P. monodon:0.0254278443,(((((((((((((C. sapidus:0.0563852284,P. trituberculatus:0.0449359986)100:0.0093725396,S. paramamosain:0.1322823981)100:0.0439783471,C. philargius:0.0979667360)77:0.0052986173,D. horrida:0.0892311681)100:0.0069071992,A. integerrimus:0.0887392654)97:0.0030875068,C. opilio:0.1791392509)100:0.0258012366,((E. j. sinensis_SA:0.0564682478,C. carnifex:0.0526593157)100:0.034005383…
busco_LG+F+C60+G.pmsf	(P. monodon:0.0254304641,((((((((((((C. sapidus:0.0562934631,P. trituberculatus:0.0450479587)100:0.0094502555,S. paramamosain:0.1321918911)100:0.0453026672,(D. horrida:0.0870319942,C. philargius:0.0966398594)100:0.0061180534)100:0.0075364207,A. integerrimus:0.0893793752)94:0.0030617616,C. opilio:0.1792177315)100:0.0257116576,((E. j. sinensis_SA:0.0563779141,C. carnifex:0.0527472274)100:0.03399361…
busco_LG+F+C60+G	(P. monodon:0.0275217765,((((((((((((C. sapidus:0.0607999275,P. trituberculatus:0.0488413105)100:0.0105700295,S. paramamosain:0.1421613678)100:0.0489132631,(D. horrida:0.0940709722,C. philargius:0.1043494337)88:0.0071260808)100:0.0083855270,A. integerrimus:0.0967309882)88:0.0036737625,C. opilio:0.1925247567)100:0.0276091001,((E. j. sinensis_SA:0.0610481276,C. carnifex:0.0571262268)100:0.036734365…
busco_default_genesortR_JTT+F+C20+G	(P. monodon:0.0220459725,((((((((((((C. sapidus:0.0444173552,P. trituberculatus:0.0390025479)100:0.0107185530,S. paramamosain:0.1052686616)100:0.0472823215,(D. horrida:0.0836338798,C. philargius:0.0967134758)99:0.0064206483)100:0.0075620981,A. integerrimus:0.0873955909)75:0.0034757706,C. opilio:0.1480223272)100:0.0268091362,((E. j. sinensis_SA:0.0550702585,C. carnifex:0.0459139313)100:0.034399260…
busco_default_genesortR_JTT+F+C60+G	(P. monodon:0.0220803229,((((((((((((C. sapidus:0.0445655749,P. trituberculatus:0.0391242844)100:0.0106326140,S. paramamosain:0.1060229675)100:0.0475965532,(D. horrida:0.0841531959,C. philargius:0.0974210723)98:0.0062687713)100:0.0075373888,A. integerrimus:0.0878020965)71:0.0033052871,C. opilio:0.1492502535)100:0.0271256085,((E. j. sinensis_SA:0.0552955095,C. carnifex:0.0460898526)100:0.034636819…
busco_genewise_lnL.txt.chazhi.10.out.fa.JTT+F+R7	(P. monodon:0.0245184723,((((((((((((C. sapidus:0.0490718166,P. trituberculatus:0.0372305061)100:0.0093748311,S. paramamosain:0.1172345296)100:0.0394914623,(D. horrida:0.0771994317,C. philargius:0.0848602559)68:0.0061401519)100:0.0076347724,A. integerrimus:0.0749936632)80:0.0033747717,C. opilio:0.1512146883)100:0.0231458089,((E. j. sinensis_SA:0.0507608090,C. carnifex:0.0471820673)100:0.028129897…
busco_genewise_lnL.txt.chazhi.2.out.fa.JTT+F+R7	(P. monodon:0.0241316626,(((((((((((((C. sapidus:0.0472336766,P. trituberculatus:0.0335208730)100:0.0067184195,S. paramamosain:0.1005689637)100:0.0310874448,D. horrida:0.0640616460)99:0.0042763304,C. philargius:0.0666229431)100:0.0057430141,A. integerrimus:0.0612738246)92:0.0031525210,C. opilio:0.1250599083)100:0.0190669141,((E. j. sinensis_SA:0.0432221185,C. carnifex:0.0440433174)100:0.022670471…
busco_genewise_lnL.txt.chazhi.5.out.fa.JTT+F+R7	(P. monodon:0.0229371467,(((((((((((((C. sapidus:0.0503476519,P. trituberculatus:0.0361568953)100:0.0086270313,S. paramamosain:0.1169204266)100:0.0369159015,D. horrida:0.0755539547)71:0.0050723236,C. philargius:0.0822047750)100:0.0069747357,A. integerrimus:0.0740790896)81:0.0033515002,C. opilio:0.1459502071)100:0.0226798760,((E. j. sinensis_SA:0.0487872775,C. carnifex:0.0468938604)100:0.027416770…
busco_genewise_lnL.txt.head.1.out.fa.JTT+F+R7	(P. monodon:0.0240184182,((((((((((((C. sapidus:0.0517464271,P. trituberculatus:0.0419342208)95:0.0095536655,S. paramamosain:0.1193181418)100:0.0419083988,(D. horrida:0.0787670816,C. philargius:0.0878831717)98:0.0068279450)92:0.0075768294,A. integerrimus:0.0806516139)88:0.0036715483,C. opilio:0.1596479403)100:0.0238976095,((E. j. sinensis_SA:0.0522090916,C. carnifex:0.0481083430)100:0.0303076905,…
busco_genewise_lnL.txt.head.10.out.fa.JTT+F+R7	(P. monodon:0.0239621526,((((((((((((C. sapidus:0.0505083064,P. trituberculatus:0.0410431287)66:0.0089480996,S. paramamosain:0.1190140425)100:0.0403920855,(D. horrida:0.0778489748,C. philargius:0.0855763182)80:0.0064124475)95:0.0076482964,A. integerrimus:0.0751671766)73:0.0033730861,C. opilio:0.1580327880)100:0.0235526653,((E. j. sinensis_SA:0.0513614608,C. carnifex:0.0473094730)100:0.0288591970,…
busco_genewise_lnL.txt.head.5.out.fa.JTT+F+R7	(P. monodon:0.0239588765,((((((((((((C. sapidus:0.0510100933,P. trituberculatus:0.0411957485)88:0.0091926252,S. paramamosain:0.1187742362)100:0.0408629139,(D. horrida:0.0784054865,C. philargius:0.0865705121)98:0.0067450832)96:0.0076950652,A. integerrimus:0.0797318814)81:0.0034255771,C. opilio:0.1584590550)100:0.0238535482,((E. j. sinensis_SA:0.0516574707,C. carnifex:0.0478140380)100:0.0292098761,…
busco_genewise_lnL.txt.head.50.out.fa.JTT+F+R7	(P. monodon:0.0233407249,(((((((((((((C. sapidus:0.0492657124,P. trituberculatus:0.0363161178)100:0.0088327045,S. paramamosain:0.1190978097)100:0.0368606510,C. philargius:0.0819898989)44:0.0050200686,D. horrida:0.0763595782)100:0.0068376923,A. integerrimus:0.0729162912)79:0.0033059954,C. opilio:0.1461571936)100:0.0227387466,((E. j. sinensis_SA:0.0496355433,C. carnifex:0.0458240804)100:0.026930741…
rbbh_JTT+F+C20+G.pmsf.constrain	(P. monodon:0.1371619985,((((((((((((C. sapidus:0.1265385460,P. trituberculatus:0.0862993435)100:0.0191470008,S. paramamosain:0.3217764437)100:0.1081654724,(D. horrida:0.1745697625,C. philargius:0.1960279171)85:0.0129408669)100:0.0227228098,A. integerrimus:0.1713778331)100:0.0121602195,C. opilio:0.3500115356)100:0.0582076206,((E. j. sinensis_SA:0.1276662475,C. carnifex:0.1118302894)100:0.06905007…
rbbh_JTT+F+C20+G.pmsf	(P. monodon:0.1372381357,(((((((((((((C. sapidus:0.1267894965,P. trituberculatus:0.0861197329)100:0.0189222369,S. paramamosain:0.3218815926)100:0.1027220479,C. philargius:0.1973067513)100:0.0133458163,D. horrida:0.1803683640)100:0.0215392902,A. integerrimus:0.1706861355)100:0.0124278147,C. opilio:0.3505852343)100:0.0582884453,((E. j. sinensis_SA:0.1276303122,C. carnifex:0.1119575436)100:0.0691830…
rbbh_JTT+F+C20+G	(P. monodon:0.1439245952,(((((((((((((C. sapidus:0.1331911985,P. trituberculatus:0.0907203705)100:0.0209020440,S. paramamosain:0.3366908883)100:0.1068086021,C. philargius:0.2074455394)97:0.0145040232,D. horrida:0.1902018430)100:0.0228902997,A. integerrimus:0.1801994860)100:0.0139776969,C. opilio:0.3671106577)100:0.0603415856,((E. j. sinensis_SA:0.1338932490,C. carnifex:0.1181289750)100:0.07301541…
rbbh_JTT+F+C20.pmsf	(P. monodon:0.1372381357,(((((((((((((C. sapidus:0.1267894965,P. trituberculatus:0.0861197329)100:0.0189222369,S. paramamosain:0.3218815926)100:0.1027220479,C. philargius:0.1973067513)100:0.0133458163,D. horrida:0.1803683640)100:0.0215392902,A. integerrimus:0.1706861355)100:0.0124278147,C. opilio:0.3505852343)100:0.0582884453,((E. j. sinensis_SA:0.1276303122,C. carnifex:0.1119575436)100:0.0691830…
rbbh_JTT+F+C20	(P. monodon:0.1439245952,(((((((((((((C. sapidus:0.1331911985,P. trituberculatus:0.0907203705)100:0.0209020440,S. paramamosain:0.3366908883)100:0.1068086021,C. philargius:0.2074455394)96:0.0145040232,D. horrida:0.1902018430)100:0.0228902997,A. integerrimus:0.1801994860)100:0.0139776969,C. opilio:0.3671106577)100:0.0603415856,((E. j. sinensis_SA:0.1338932490,C. carnifex:0.1181289750)100:0.07301541…
rbbh_JTT+F+C60+G.pmsf.constrain	(P. monodon:0.1380836748,((((((((((((C. sapidus:0.1273679366,P. trituberculatus:0.0864549475)100:0.0185102893,S. paramamosain:0.3258290566)100:0.1095188457,(D. horrida:0.1758610885,C. philargius:0.1976624601)92:0.0123588965)100:0.0226732020,A. integerrimus:0.1721032347)100:0.0115875894,C. opilio:0.3538531627)100:0.0592653571,((E. j. sinensis_SA:0.1282115174,C. carnifex:0.1123941364)100:0.06948189…
rbbh_JTT+F+C60+G.pmsf	(P. monodon:0.1381620966,(((((((((((((C. sapidus:0.1276009181,P. trituberculatus:0.0863052880)100:0.0183213300,S. paramamosain:0.3259516006)100:0.1041616117,C. philargius:0.1988325710)100:0.0129231553,D. horrida:0.1813931673)100:0.0214984518,A. integerrimus:0.1714113501)100:0.0118336634,C. opilio:0.3544512000)100:0.0593532368,((E. j. sinensis_SA:0.1282139917,C. carnifex:0.1124941862)100:0.0695839…
rbbh_JTT+F+C60+G	(P. monodon:0.1452943051,(((((((((((((C. sapidus:0.1344639501,P. trituberculatus:0.0912635724)100:0.0206351831,S. paramamosain:0.3417654838)100:0.1084490563,C. philargius:0.2098121542)98:0.0142229842,D. horrida:0.1920332218)100:0.0229263696,A. integerrimus:0.1818022267)99:0.0135496617,C. opilio:0.3722262012)100:0.0614202335,((E. j. sinensis_SA:0.1349503249,C. carnifex:0.1191806952)100:0.073856481…
rbbh_JTT+F+C60	(P. monodon:0.1453064677,(((((((((((((C. sapidus:0.1344772339,P. trituberculatus:0.0912706879):0.0206363105,S. paramamosain:0.3418013755):0.1084639282,C. philargius:0.2098323313):0.0142250948,D. horrida:0.1920532036):0.0229262164,A. integerrimus:0.1818171568):0.0135463561,C. opilio:0.3722699735):0.0614271718,((E. j. sinensis_SA:0.1349653437,C. carnifex:0.1191902315):0.0738608185,xixie:0.606977487…
rbbh_LG+C20+F+G.pmsf.constrain	(P. monodon:0.1460671682,((((((((((((C. sapidus:0.1356585749,P. trituberculatus:0.0929284185)100:0.0213817105,S. paramamosain:0.3468840106)100:0.1143083216,(D. horrida:0.1884574356,C. philargius:0.2115274461)94:0.0146556476)100:0.0241818318,A. integerrimus:0.1854735461)100:0.0134797470,C. opilio:0.3803563123)100:0.0613866621,((E. j. sinensis_SA:0.1379821838,C. carnifex:0.1214749562)100:0.07380808…
rbbh_LG+C20+F+G.pmsf	(P. monodon:0.1461559928,(((((((((((((C. sapidus:0.1359518764,P. trituberculatus:0.0927174777)100:0.0211052095,S. paramamosain:0.3470002235)100:0.1083187899,C. philargius:0.2132975123)100:0.0147574264,D. horrida:0.1951957121)100:0.0229341761,A. integerrimus:0.1846176510)100:0.0137762345,C. opilio:0.3809436699)100:0.0614832552,((E. j. sinensis_SA:0.1379650433,C. carnifex:0.1216000274)100:0.0739323…
rbbh_LG+C20+F+G	(P. monodon:0.1536041080,(((((((((((((C. sapidus:0.1430821049,P. trituberculatus:0.0978166127)100:0.0231640192,S. paramamosain:0.3637136104)100:0.1130379870,C. philargius:0.2246316111)92:0.0160068627,D. horrida:0.2061609470)100:0.0244458536,A. integerrimus:0.1952075776)100:0.0154349526,C. opilio:0.3996840400)100:0.0638690423,((E. j. sinensis_SA:0.1450258659,C. carnifex:0.1284645480)100:0.07824390…
rbbh_LG+C60+F+G.pmsf.constrain	(P. monodon:0.1475522501,((((((((((((C. sapidus:0.1370884357,P. trituberculatus:0.0933030198)100:0.0207784504,S. paramamosain:0.3532632194)100:0.1163260094,(D. horrida:0.1907667807,C. philargius:0.2143617812)96:0.0139898900)100:0.0241964914,A. integerrimus:0.1870585413)100:0.0127466661,C. opilio:0.3869009857)100:0.0629619845,((E. j. sinensis_SA:0.1389986552,C. carnifex:0.1226470147)100:0.07471276…
rbbh_LG+C60+F+G.pmsf	(P. monodon:0.1476672642,(((((((((((((C. sapidus:0.1373753567,P. trituberculatus:0.0931459850)100:0.0205336098,S. paramamosain:0.3534695367)100:0.1104828049,C. philargius:0.2159890541)100:0.0142909803,D. horrida:0.1971680101)100:0.0229614617,A. integerrimus:0.1862491448)100:0.0130229060,C. opilio:0.3876892245)100:0.0630661813,((E. j. sinensis_SA:0.1390078165,C. carnifex:0.1227901426)100:0.0748477…
rbbh_LG+C60+F+G	(P. monodon:0.1557538430,(((((((((((((C. sapidus:0.1451328199,P. trituberculatus:0.0987389921)100:0.0229928858,S. paramamosain:0.3715055321)100:0.1153978460,C. philargius:0.2284549307)96:0.0157017582,D. horrida:0.2092459715)100:0.0245716384,A. integerrimus:0.1979821131)100:0.0149038458,C. opilio:0.4079716875)100:0.0654806487,((E. j. sinensis_SA:0.1467159230,C. carnifex:0.1303524149)100:0.07962043…
rbbh_default_genesortR_JTT+F+C20+G	(P. monodon:0.0809241357,(((((((((((((C. sapidus:0.0717210883,P. trituberculatus:0.0510300649)100:0.0144833014,S. paramamosain:0.1725076660)100:0.0716632824,C. philargius:0.1231410516)100:0.0088940877,D. horrida:0.1081131997)100:0.0151374829,A. integerrimus:0.1049960995)100:0.0098507974,C. opilio:0.2022992249)100:0.0405809402,((E. j. sinensis_SA:0.0778553614,C. carnifex:0.0618852658)100:0.0465105…
rbbh_default_genesortR_JTT+F+C60+G	(P. monodon:0.0813920616,(((((((((((((C. sapidus:0.0721091875,P. trituberculatus:0.0512313411)100:0.0143130081,S. paramamosain:0.1741545972)100:0.0724194507,C. philargius:0.1239427885)100:0.0087739490,D. horrida:0.1087550617)100:0.0151320096,A. integerrimus:0.1055127640)100:0.0097084853,C. opilio:0.2040758599)100:0.0409837472,((E. j. sinensis_SA:0.0782842071,C. carnifex:0.0621664971)100:0.0468490…
rbbh_genewise_lnL.txt.chazhi.10.out.fa.JTT+F+R7	(P. monodon:0.1554645264,(((((((((((((C. sapidus:0.1566119903,P. trituberculatus:0.1058617746)100:0.0262126781,S. paramamosain:0.4133242906)100:0.1233187604,C. philargius:0.2409276427)100:0.0208125275,D. horrida:0.2191779782)100:0.0282550161,A. integerrimus:0.2119480914)100:0.0201161564,C. opilio:0.4189297248)100:0.0733070435,((E. j. sinensis_SA:0.1550591563,C. carnifex:0.1363996575)100:0.0815579…
rbbh_genewise_lnL.txt.chazhi.2.out.fa.JTT+F+R7	(P. monodon:0.1607150650,(((((((((((((C. sapidus:0.1805126687,P. trituberculatus:0.1217253598)100:0.0284592987,S. paramamosain:0.5452776956)100:0.1243250327,C. philargius:0.2535473785)100:0.0257981562,D. horrida:0.2542304589)100:0.0282651150,A. integerrimus:0.2198134844)100:0.0263604646,C. opilio:0.4733468705)100:0.0724737971,((E. j. sinensis_SA:0.1688944388,C. carnifex:0.1632146653)100:0.0834354…
rbbh_genewise_lnL.txt.chazhi.5.out.fa.JTT+F+R7	(P. monodon:0.1556435404,(((((((((((((C. sapidus:0.1707477022,P. trituberculatus:0.1193532910)100:0.0274676888,S. paramamosain:0.4869895423)100:0.1314344318,C. philargius:0.2550839744)100:0.0252678711,D. horrida:0.2319601784)100:0.0291447282,A. integerrimus:0.2307447342)91:0.0222672910,C. opilio:0.4557143080)100:0.0801073868,((E. j. sinensis_SA:0.1671769858,C. carnifex:0.1531706301)100:0.08673149…
rbbh_genewise_lnL.txt.head.10.out.fa.JTT+F+R7	(P. monodon:0.1739168999,(((((((((((((C. sapidus:0.1571400948,P. trituberculatus:0.1056566130)100:0.0257297143,S. paramamosain:0.3887757513)100:0.1235479425,C. philargius:0.2413019508)100:0.0207008425,D. horrida:0.2183065420)100:0.0283916190,A. integerrimus:0.2073268606)100:0.0207974445,C. opilio:0.4282051735)100:0.0694205505,((E. j. sinensis_SA:0.1606444610,C. carnifex:0.1351858839)100:0.0842738…
rbbh_genewise_lnL.txt.head.100.out.fa.JTT+F+R7	(P. monodon:0.1549921016,(((((((((((((C. sapidus:0.1547588867,P. trituberculatus:0.1046777293)100:0.0259914322,S. paramamosain:0.4060475797)100:0.1228506774,C. philargius:0.2389662305)100:0.0207577561,D. horrida:0.2165139343)100:0.0278815218,A. integerrimus:0.2094965911)100:0.0202494778,C. opilio:0.4214569772)100:0.0727103771,((E. j. sinensis_SA:0.1532499082,C. carnifex:0.1347126109)100:0.0812932…
rbbh_genewise_lnL.txt.head.5.out.fa.JTT+F+R7	(P. monodon:0.1737785180,(((((((((((((C. sapidus:0.1570332559,P. trituberculatus:0.1059142209)100:0.0258124080,S. paramamosain:0.3892608691)100:0.1238122258,C. philargius:0.2413311360)100:0.0206606514,D. horrida:0.2186118348)100:0.0284596696,A. integerrimus:0.2075762077)100:0.0207279625,C. opilio:0.4274663164)100:0.0696660765,((E. j. sinensis_SA:0.1608854365,C. carnifex:0.1351324736)100:0.0847508…
rbbh_genewise_lnL.txt.head.50.out.fa.JTT+F+R7	(P. monodon:0.1645681237,(((((((((((((C. sapidus:0.1536580928,P. trituberculatus:0.1024801999)100:0.0258246525,S. paramamosain:0.3921124899)100:0.1222975495,C. philargius:0.2418875589)100:0.0208511485,D. horrida:0.2181789665)100:0.0290040736,A. integerrimus:0.2078348971)100:0.0209143515,C. opilio:0.4165017114)100:0.0703028742,((E. j. sinensis_SA:0.1567074690,C. carnifex:0.1334087040)100:0.0832965…
